# Supplementary material
Source: Elsevier journal article supplement (https://univ-rennes.hal.science/hal-01532174v1/file/mmc2.zip)
Supplement: mmc2 [file mmc2.zip › Complex_4.cif]

data_jc007
_audit_creation_date              2016-09-05
_audit_creation_method
;
Olex2 1.2
(compiled 2016.08.23 svn.r3337 for OlexSys, GUI svn.r5217)
;
_publ_contact_author_address      ?
_publ_contact_author_email        ?
_publ_contact_author_name         ''
_publ_contact_author_phone        ?
_publ_section_references
;
Bourhis, L.J., Dolomanov, O.V., Gildea, R.J., Howard, J.A.K., Puschmann, H.
 (2015). Acta Cryst. A71, 59-75.

Dolomanov, O.V., Bourhis, L.J., Gildea, R.J, Howard, J.A.K. & Puschmann, H.
 (2009), J. Appl. Cryst. 42, 339-341.

Sheldrick, G.M. (2008). Acta Cryst. A64, 112-122.
;
_chemical_name_common             ?
_chemical_name_systematic         ?
_chemical_formula_moiety          'C25 H22 N2 Ni O4, H2 O'
_chemical_formula_sum             'C25 H24 N2 Ni O5'
_chemical_formula_weight          491.17
_chemical_melting_point           ?
loop_
  _atom_type_symbol
  _atom_type_description
  _atom_type_scat_dispersion_real
  _atom_type_scat_dispersion_imag
  _atom_type_scat_source
 'C' 'C' 0.0033 0.0016 'International Tables Vol C Tables 4.2.6.8 and 6.1.1.4'
 'H' 'H' 0.0000 0.0000 'International Tables Vol C Tables 4.2.6.8 and 6.1.1.4'
 'N' 'N' 0.0061 0.0033 'International Tables Vol C Tables 4.2.6.8 and 6.1.1.4'
 'Ni' 'Ni' 0.3393 1.1124 'International Tables Vol C Tables 4.2.6.8 and 6.1.1.4'
 'O' 'O' 0.0106 0.0060 'International Tables Vol C Tables 4.2.6.8 and 6.1.1.4'

_shelx_space_group_comment
;
The symmetry employed for this shelxl refinement is uniquely defined
by the following loop, which should always be used as a source of
symmetry information in preference to the above space-group names.
They are only intended as comments.
;
_space_group_crystal_system       'monoclinic'
_space_group_IT_number            15
_space_group_name_H-M_alt         'C 1 2/c 1'
_space_group_name_Hall            '-C 2yc'
loop_
  _space_group_symop_operation_xyz
 'x, y, z'
 '-x, y, -z+1/2'
 'x+1/2, y+1/2, z'
 '-x+1/2, y+1/2, -z+1/2'
 '-x, -y, -z'
 'x, -y, z-1/2'
 '-x+1/2, -y+1/2, -z'
 'x+1/2, -y+1/2, z-1/2'

_cell_length_a                    30.573(3)
_cell_length_b                    7.2985(6)
_cell_length_c                    24.800(4)
_cell_angle_alpha                 90
_cell_angle_beta                  127.384(2)
_cell_angle_gamma                 90
_cell_volume                      4397.0(8)
_cell_formula_units_Z             8
_cell_measurement_reflns_used     7521
_cell_measurement_temperature     296(2)
_cell_measurement_theta_max       25.01
_cell_measurement_theta_min       2.68
_shelx_estimated_absorpt_T_max    0.980
_shelx_estimated_absorpt_T_min    0.598
_exptl_absorpt_coefficient_mu     0.923
_exptl_absorpt_correction_T_max   1.0000
_exptl_absorpt_correction_T_min   0.7419
_exptl_absorpt_correction_type    numerical
_exptl_absorpt_process_details
;
SADABS-2012/1 (Bruker,2012) was used for absorption correction.
wR2(int) was 0.0804 before and 0.0660 after correction.
The Ratio of minimum to maximum transmission is 0.7419.
The \l/2 correction factor is 0.0015.
;
_exptl_absorpt_special_details    ?
_exptl_crystal_colour             'clear dark red'
_exptl_crystal_colour_lustre      clear
_exptl_crystal_colour_modifier    dark
_exptl_crystal_colour_primary     red
_exptl_crystal_density_diffrn     1.484
_exptl_crystal_density_meas       .
_exptl_crystal_density_method     ?
_exptl_crystal_description        block
_exptl_crystal_F_000              2048
_exptl_crystal_size_max           0.62
_exptl_crystal_size_mid           0.274
_exptl_crystal_size_min           0.022
_exptl_transmission_factor_max    ?
_exptl_transmission_factor_min    ?
_diffrn_reflns_av_R_equivalents   0.0594
_diffrn_reflns_av_unetI/netI      0.0456
_diffrn_reflns_Laue_measured_fraction_full 0.996
_diffrn_reflns_Laue_measured_fraction_max 0.996
_diffrn_reflns_limit_h_max        36
_diffrn_reflns_limit_h_min        -36
_diffrn_reflns_limit_k_max        8
_diffrn_reflns_limit_k_min        -8
_diffrn_reflns_limit_l_max        29
_diffrn_reflns_limit_l_min        -29
_diffrn_reflns_number             19886
_diffrn_reflns_point_group_measured_fraction_full 0.996
_diffrn_reflns_point_group_measured_fraction_max 0.996
_diffrn_reflns_theta_full         24.937
_diffrn_reflns_theta_max          24.937
_diffrn_reflns_theta_min          2.665
_diffrn_ambient_temperature       296.15
_diffrn_detector_area_resol_mean  ?
_diffrn_measured_fraction_theta_full 0.996
_diffrn_measured_fraction_theta_max 0.996
_diffrn_measurement_device_type   'Bruker APEX-II CCD'
_diffrn_measurement_method        '\f and \w scans'
_diffrn_radiation_monochromator   'graphite'
_diffrn_radiation_type            MoK\a
_diffrn_radiation_wavelength      0.71073
_diffrn_source                    ?
_diffrn_standards_number          0
_reflns_Friedel_coverage          0.000
_reflns_Friedel_fraction_full     .
_reflns_Friedel_fraction_max      .
_reflns_number_gt                 2901
_reflns_number_total              3845
_reflns_special_details
;
 Reflections were merged by SHELXL according to the crystal
 class for the calculation of statistics and refinement.
 
 _reflns_Friedel_fraction is defined as the number of unique
 Friedel pairs measured divided by the number that would be
 possible theoretically, ignoring centric projections and
 systematic absences.
;
_reflns_threshold_expression      'I > 2\s(I)'
_computing_cell_refinement        'SAINT v8.27A (Bruker, 2012)'
_computing_data_collection        ?
_computing_data_reduction         'SAINT v8.27A (Bruker, 2012)'
_computing_molecular_graphics     'Olex2 (Dolomanov et al., 2009)'
_computing_publication_material   'Olex2 (Dolomanov et al., 2009)'
_computing_structure_refinement   'XL (Sheldrick, 2008)'
_computing_structure_solution     'olex2.solve (Bourhis et al., 2015)'
_refine_diff_density_max          0.651
_refine_diff_density_min          -0.387
_refine_diff_density_rms          0.075
_refine_ls_extinction_coef        .
_refine_ls_extinction_method      none
_refine_ls_goodness_of_fit_ref    1.132
_refine_ls_hydrogen_treatment     constr
_refine_ls_matrix_type            full
_refine_ls_number_parameters      304
_refine_ls_number_reflns          3845
_refine_ls_number_restraints      0
_refine_ls_R_factor_all           0.0895
_refine_ls_R_factor_gt            0.0605
_refine_ls_restrained_S_all       1.132
_refine_ls_shift/su_max           0.001
_refine_ls_shift/su_mean          0.000
_refine_ls_structure_factor_coef  Fsqd
_refine_ls_weighting_details
'w=1/[\s^2^(Fo^2^)+31.0764P] where P=(Fo^2^+2Fc^2^)/3'
_refine_ls_weighting_scheme       calc
_refine_ls_wR_factor_gt           0.1104
_refine_ls_wR_factor_ref          0.1226
_refine_special_details           ?
_olex2_refinement_description
;
1. Fixed Uiso
 At 1.2 times of:
  All C(H) groups
 At 1.5 times of:
  All C(H,H,H) groups, All O(H,H) groups
2.a Free rotating group:
 O5(H5A,H5B)
2.b Aromatic/amide H refined with riding coordinates:
 C3(H3), C4(H4), C6(H6), C7(H7), C9(H9), C13(H13), C14(H14), C15(H15),
 C16(H16), C18(H18), C21(H21), C23(H23), C24(H24)
2.c Idealised Me refined as rotating group:
 C1(H1A,H1B,H1C), C11(H11A,H11B,H11C), C25(H25A,H25B,H25C)
;
_atom_sites_solution_hydrogens    mixed
_atom_sites_solution_primary      iterative
_atom_sites_solution_secondary    ?
loop_
  _atom_site_label
  _atom_site_type_symbol
  _atom_site_fract_x
  _atom_site_fract_y
  _atom_site_fract_z
  _atom_site_U_iso_or_equiv
  _atom_site_adp_type
  _atom_site_occupancy
  _atom_site_site_symmetry_order
  _atom_site_calc_flag
  _atom_site_refinement_flags_posn
  _atom_site_refinement_flags_adp
  _atom_site_refinement_flags_occupancy
  _atom_site_disorder_assembly
  _atom_site_disorder_group
 Ni1 Ni 0.72945(2) 0.79512(9) 0.61099(3) 0.03316(18) Uani 1 1 d . . . . .
 O1 O 0.66399(12) 0.7372(5) 0.59461(14) 0.0390(8) Uani 1 1 d . . . . .
 O2 O 0.68406(12) 0.8911(5) 0.52479(15) 0.0379(8) Uani 1 1 d . . . . .
 O3 O 0.43636(14) 0.6691(6) 0.54311(18) 0.0560(11) Uani 1 1 d . . . . .
 O4 O 0.63135(17) 1.2172(5) 0.32839(18) 0.0576(10) Uani 1 1 d . . . . .
 N1 N 0.77376(14) 0.7196(5) 0.70138(17) 0.0321(9) Uani 1 1 d . . . . .
 N2 N 0.79445(14) 0.8431(5) 0.62347(17) 0.0287(9) Uani 1 1 d . . . . .
 C1 C 0.3932(2) 0.7388(9) 0.4782(3) 0.0651(18) Uani 1 1 d . . . . .
 H1A H 0.3925 0.6743 0.4440 0.098 Uiso 1 1 calc GR . . . .
 H1B H 0.3991 0.8669 0.4762 0.098 Uiso 1 1 calc GR . . . .
 H1C H 0.3587 0.7223 0.4706 0.098 Uiso 1 1 calc GR . . . .
 C2 C 0.48895(19) 0.6782(7) 0.5627(2) 0.0369(11) Uani 1 1 d . . . . .
 C3 C 0.5294(2) 0.6104(8) 0.6264(2) 0.0466(13) Uani 1 1 d . . . . .
 H3 H 0.5199 0.5595 0.6523 0.056 Uiso 1 1 calc R . . . .
 C4 C 0.5834(2) 0.6172(7) 0.6518(2) 0.0436(13) Uani 1 1 d . . . . .
 H4 H 0.6103 0.5719 0.6950 0.052 Uiso 1 1 calc R . . . .
 C5 C 0.59892(17) 0.6907(7) 0.6139(2) 0.0320(10) Uani 1 1 d . . . . .
 C6 C 0.55747(19) 0.7538(6) 0.5495(2) 0.0377(12) Uani 1 1 d . . . . .
 H6 H 0.5667 0.7998 0.5227 0.045 Uiso 1 1 calc R . . . .
 C7 C 0.50287(19) 0.7507(7) 0.5237(2) 0.0425(13) Uani 1 1 d . . . . .
 H7 H 0.4759 0.7968 0.4806 0.051 Uiso 1 1 calc R . . . .
 C8 C 0.65715(18) 0.7088(7) 0.6402(2) 0.0325(10) Uani 1 1 d . . . . .
 C9 C 0.69976(19) 0.7039(8) 0.7089(2) 0.0416(12) Uani 1 1 d . . . . .
 H9 H 0.6903 0.6944 0.7381 0.050 Uiso 1 1 calc R . . . .
 C10 C 0.75561(19) 0.7120(7) 0.7383(2) 0.0375(11) Uani 1 1 d . . . . .
 C11 C 0.7936(2) 0.7214(8) 0.8148(2) 0.0514(14) Uani 1 1 d . . . . .
 H11A H 0.8034 0.5996 0.8331 0.077 Uiso 1 1 calc GR . . . .
 H11B H 0.7754 0.7828 0.8303 0.077 Uiso 1 1 calc GR . . . .
 H11C H 0.8263 0.7879 0.8296 0.077 Uiso 1 1 calc GR . . . .
 C12 C 0.82983(18) 0.7074(7) 0.7284(2) 0.0357(11) Uani 1 1 d . . . . .
 C13 C 0.8718(2) 0.6200(7) 0.7884(2) 0.0452(13) Uani 1 1 d . . . . .
 H13 H 0.8641 0.5605 0.8149 0.054 Uiso 1 1 calc R . . . .
 C14 C 0.9250(2) 0.6224(8) 0.8082(3) 0.0545(15) Uani 1 1 d . . . . .
 H14 H 0.9530 0.5662 0.8487 0.065 Uiso 1 1 calc R . . . .
 C15 C 0.9368(2) 0.7072(8) 0.7688(3) 0.0536(15) Uani 1 1 d . . . . .
 H15 H 0.9730 0.7129 0.7838 0.064 Uiso 1 1 calc R . . . .
 C16 C 0.89529(19) 0.7835(7) 0.7071(3) 0.0437(12) Uani 1 1 d . . . . .
 H16 H 0.9029 0.8358 0.6795 0.052 Uiso 1 1 calc R . . . .
 C17 C 0.84155(18) 0.7807(7) 0.6869(2) 0.0366(11) Uani 1 1 d . . . . .
 C18 C 0.79792(19) 0.9095(6) 0.5776(2) 0.0324(11) Uani 1 1 d . . . . .
 H18 H 0.8328 0.9142 0.5882 0.039 Uiso 1 1 calc R . . . .
 C19 C 0.75335(19) 0.9753(6) 0.5127(2) 0.0308(11) Uani 1 1 d . . . . .
 C20 C 0.69845(19) 0.9685(6) 0.4902(2) 0.0312(10) Uani 1 1 d . . . . .
 C21 C 0.6568(2) 1.0483(6) 0.4276(2) 0.0368(11) Uani 1 1 d . . . . .
 H21 H 0.6205 1.0462 0.4126 0.044 Uiso 1 1 calc R . . . .
 C22 C 0.6690(2) 1.1293(7) 0.3884(2) 0.0407(12) Uani 1 1 d . . . . .
 C23 C 0.7229(2) 1.1290(7) 0.4086(3) 0.0446(13) Uani 1 1 d . . . . .
 H23 H 0.7307 1.1798 0.3809 0.054 Uiso 1 1 calc R . . . .
 C24 C 0.7639(2) 1.0526(7) 0.4697(3) 0.0405(12) Uani 1 1 d . . . . .
 H24 H 0.7997 1.0518 0.4832 0.049 Uiso 1 1 calc R . . . .
 C25 C 0.5768(3) 1.2314(9) 0.3072(3) 0.0684(18) Uani 1 1 d . . . . .
 H25A H 0.5546 1.2959 0.2647 0.103 Uiso 1 1 calc GR . . . .
 H25B H 0.5768 1.2970 0.3407 0.103 Uiso 1 1 calc GR . . . .
 H25C H 0.5619 1.1110 0.3016 0.103 Uiso 1 1 calc GR . . . .
 O5 O 0.5887(2) 0.6816(8) 0.4225(2) 0.0878(16) Uani 1 1 d . . . . .
 H5A H 0.5803 0.5921 0.4366 0.132 Uiso 1 1 d G . . . .
 H5B H 0.6103 0.7339 0.4573 0.132 Uiso 1 1 d G . . . .

loop_
  _atom_site_aniso_label
  _atom_site_aniso_U_11
  _atom_site_aniso_U_22
  _atom_site_aniso_U_33
  _atom_site_aniso_U_23
  _atom_site_aniso_U_13
  _atom_site_aniso_U_12
 Ni1 0.0325(3) 0.0378(4) 0.0299(3) -0.0035(3) 0.0193(3) -0.0049(3)
 O1 0.0289(17) 0.058(2) 0.0285(16) 0.0013(15) 0.0166(14) -0.0052(16)
 O2 0.0323(18) 0.049(2) 0.0334(17) 0.0064(16) 0.0205(15) -0.0015(16)
 O3 0.0328(19) 0.080(3) 0.049(2) 0.011(2) 0.0211(17) -0.0054(19)
 O4 0.077(3) 0.054(2) 0.044(2) 0.0137(19) 0.038(2) 0.001(2)
 N1 0.028(2) 0.034(2) 0.0292(19) 0.0006(18) 0.0146(17) 0.0018(18)
 N2 0.028(2) 0.022(2) 0.0285(19) -0.0086(16) 0.0135(17) -0.0049(16)
 C1 0.034(3) 0.090(5) 0.059(4) 0.015(3) 0.022(3) 0.000(3)
 C2 0.033(3) 0.036(3) 0.040(3) -0.002(2) 0.022(2) -0.007(2)
 C3 0.042(3) 0.061(4) 0.039(3) 0.011(3) 0.026(3) -0.002(3)
 C4 0.037(3) 0.055(3) 0.036(3) 0.013(3) 0.021(2) 0.004(3)
 C5 0.029(2) 0.032(3) 0.033(2) -0.002(2) 0.018(2) -0.003(2)
 C6 0.038(3) 0.040(3) 0.038(3) 0.009(2) 0.025(2) 0.001(2)
 C7 0.034(3) 0.053(4) 0.033(2) 0.013(2) 0.016(2) 0.002(2)
 C8 0.032(2) 0.029(2) 0.035(2) -0.002(2) 0.019(2) 0.000(2)
 C9 0.038(3) 0.059(3) 0.032(2) 0.002(3) 0.023(2) -0.004(3)
 C10 0.037(3) 0.041(3) 0.029(2) 0.001(2) 0.017(2) -0.004(2)
 C11 0.048(3) 0.068(4) 0.032(3) 0.005(3) 0.021(2) 0.002(3)
 C12 0.034(3) 0.031(3) 0.037(2) -0.010(2) 0.018(2) -0.004(2)
 C13 0.041(3) 0.042(3) 0.039(3) 0.005(2) 0.017(2) 0.007(3)
 C14 0.040(3) 0.057(4) 0.048(3) 0.002(3) 0.017(3) 0.010(3)
 C15 0.032(3) 0.058(4) 0.060(3) -0.017(3) 0.022(3) -0.003(3)
 C16 0.038(3) 0.046(3) 0.048(3) -0.010(3) 0.027(2) -0.005(3)
 C17 0.035(3) 0.027(3) 0.038(3) -0.013(2) 0.017(2) -0.002(2)
 C18 0.033(3) 0.024(3) 0.040(3) -0.014(2) 0.022(2) -0.008(2)
 C19 0.039(3) 0.019(3) 0.038(3) -0.012(2) 0.026(2) -0.009(2)
 C20 0.038(3) 0.027(3) 0.033(2) -0.008(2) 0.024(2) -0.006(2)
 C21 0.038(3) 0.035(3) 0.036(3) -0.005(2) 0.022(2) -0.006(2)
 C22 0.062(3) 0.028(3) 0.037(3) -0.005(2) 0.032(3) -0.009(3)
 C23 0.069(4) 0.034(3) 0.051(3) -0.007(3) 0.046(3) -0.010(3)
 C24 0.049(3) 0.033(3) 0.055(3) -0.012(3) 0.039(3) -0.011(2)
 C25 0.073(4) 0.069(5) 0.051(3) 0.019(3) 0.031(3) 0.011(4)
 O5 0.087(4) 0.113(5) 0.060(3) -0.007(3) 0.043(3) -0.048(3)

_geom_special_details
;
 All esds (except the esd in the dihedral angle between two l.s. planes)
 are estimated using the full covariance matrix.  The cell esds are taken
 into account individually in the estimation of esds in distances, angles
 and torsion angles; correlations between esds in cell parameters are only
 used when they are defined by crystal symmetry.  An approximate (isotropic)
 treatment of cell esds is used for estimating esds involving l.s. planes.
;
loop_
  _geom_bond_atom_site_label_1
  _geom_bond_atom_site_label_2
  _geom_bond_distance
  _geom_bond_site_symmetry_2
  _geom_bond_publ_flag
 Ni1 O1 1.834(3) . ?
 Ni1 O2 1.839(3) . ?
 Ni1 N1 1.865(4) . ?
 Ni1 N2 1.849(4) . ?
 O1 C8 1.286(5) . ?
 O2 C20 1.306(5) . ?
 O3 C1 1.418(6) . ?
 O3 C2 1.370(5) . ?
 O4 C22 1.368(6) . ?
 O4 C25 1.416(7) . ?
 N1 C10 1.330(6) . ?
 N1 C12 1.415(6) . ?
 N2 C17 1.417(6) . ?
 N2 C18 1.299(6) . ?
 C1 H1A 0.9600 . ?
 C1 H1B 0.9600 . ?
 C1 H1C 0.9600 . ?
 C2 C3 1.377(6) . ?
 C2 C7 1.377(6) . ?
 C3 H3 0.9300 . ?
 C3 C4 1.364(7) . ?
 C4 H4 0.9300 . ?
 C4 C5 1.390(6) . ?
 C5 C6 1.383(6) . ?
 C5 C8 1.484(6) . ?
 C6 H6 0.9300 . ?
 C6 C7 1.378(6) . ?
 C7 H7 0.9300 . ?
 C8 C9 1.380(6) . ?
 C9 H9 0.9300 . ?
 C9 C10 1.392(6) . ?
 C10 C11 1.508(6) . ?
 C11 H11A 0.9600 . ?
 C11 H11B 0.9600 . ?
 C11 H11C 0.9600 . ?
 C12 C13 1.396(6) . ?
 C12 C17 1.386(7) . ?
 C13 H13 0.9300 . ?
 C13 C14 1.382(7) . ?
 C14 H14 0.9300 . ?
 C14 C15 1.379(8) . ?
 C15 H15 0.9300 . ?
 C15 C16 1.379(7) . ?
 C16 H16 0.9300 . ?
 C16 C17 1.397(6) . ?
 C18 H18 0.9300 . ?
 C18 C19 1.419(6) . ?
 C19 C20 1.413(6) . ?
 C19 C24 1.405(6) . ?
 C20 C21 1.404(6) . ?
 C21 H21 0.9300 . ?
 C21 C22 1.372(6) . ?
 C22 C23 1.401(7) . ?
 C23 H23 0.9300 . ?
 C23 C24 1.368(7) . ?
 C24 H24 0.9300 . ?
 C25 H25A 0.9600 . ?
 C25 H25B 0.9600 . ?
 C25 H25C 0.9600 . ?
 O5 H5A 0.8511 . ?
 O5 H5B 0.7973 . ?

loop_
  _geom_angle_atom_site_label_1
  _geom_angle_atom_site_label_2
  _geom_angle_atom_site_label_3
  _geom_angle
  _geom_angle_site_symmetry_1
  _geom_angle_site_symmetry_3
  _geom_angle_publ_flag
 O1 Ni1 O2 83.02(13) . . ?
 O1 Ni1 N1 95.54(15) . . ?
 O1 Ni1 N2 176.47(15) . . ?
 O2 Ni1 N1 173.98(17) . . ?
 O2 Ni1 N2 95.64(15) . . ?
 N2 Ni1 N1 86.12(16) . . ?
 C8 O1 Ni1 125.5(3) . . ?
 C20 O2 Ni1 127.6(3) . . ?
 C2 O3 C1 118.0(4) . . ?
 C22 O4 C25 117.6(4) . . ?
 C10 N1 Ni1 122.6(3) . . ?
 C10 N1 C12 124.3(4) . . ?
 C12 N1 Ni1 112.0(3) . . ?
 C17 N2 Ni1 112.9(3) . . ?
 C18 N2 Ni1 125.1(3) . . ?
 C18 N2 C17 121.6(4) . . ?
 O3 C1 H1A 109.5 . . ?
 O3 C1 H1B 109.5 . . ?
 O3 C1 H1C 109.5 . . ?
 H1A C1 H1B 109.5 . . ?
 H1A C1 H1C 109.5 . . ?
 H1B C1 H1C 109.5 . . ?
 O3 C2 C3 115.7(4) . . ?
 O3 C2 C7 124.5(4) . . ?
 C7 C2 C3 119.8(4) . . ?
 C2 C3 H3 119.7 . . ?
 C4 C3 C2 120.6(5) . . ?
 C4 C3 H3 119.7 . . ?
 C3 C4 H4 119.5 . . ?
 C3 C4 C5 121.0(5) . . ?
 C5 C4 H4 119.5 . . ?
 C4 C5 C8 123.2(4) . . ?
 C6 C5 C4 117.4(4) . . ?
 C6 C5 C8 119.4(4) . . ?
 C5 C6 H6 118.9 . . ?
 C7 C6 C5 122.2(4) . . ?
 C7 C6 H6 118.9 . . ?
 C2 C7 C6 119.0(4) . . ?
 C2 C7 H7 120.5 . . ?
 C6 C7 H7 120.5 . . ?
 O1 C8 C5 114.9(4) . . ?
 O1 C8 C9 123.6(4) . . ?
 C9 C8 C5 121.4(4) . . ?
 C8 C9 H9 117.1 . . ?
 C8 C9 C10 125.8(4) . . ?
 C10 C9 H9 117.1 . . ?
 N1 C10 C9 122.2(4) . . ?
 N1 C10 C11 122.6(4) . . ?
 C9 C10 C11 115.2(4) . . ?
 C10 C11 H11A 109.5 . . ?
 C10 C11 H11B 109.5 . . ?
 C10 C11 H11C 109.5 . . ?
 H11A C11 H11B 109.5 . . ?
 H11A C11 H11C 109.5 . . ?
 H11B C11 H11C 109.5 . . ?
 C13 C12 N1 126.8(5) . . ?
 C17 C12 N1 114.2(4) . . ?
 C17 C12 C13 118.8(4) . . ?
 C12 C13 H13 120.2 . . ?
 C14 C13 C12 119.7(5) . . ?
 C14 C13 H13 120.2 . . ?
 C13 C14 H14 119.6 . . ?
 C15 C14 C13 120.7(5) . . ?
 C15 C14 H14 119.6 . . ?
 C14 C15 H15 119.8 . . ?
 C14 C15 C16 120.4(5) . . ?
 C16 C15 H15 119.8 . . ?
 C15 C16 H16 120.6 . . ?
 C15 C16 C17 118.8(5) . . ?
 C17 C16 H16 120.6 . . ?
 C12 C17 N2 113.7(4) . . ?
 C12 C17 C16 121.2(5) . . ?
 C16 C17 N2 125.1(5) . . ?
 N2 C18 H18 117.0 . . ?
 N2 C18 C19 125.9(4) . . ?
 C19 C18 H18 117.0 . . ?
 C20 C19 C18 121.9(4) . . ?
 C24 C19 C18 119.4(4) . . ?
 C24 C19 C20 118.7(4) . . ?
 O2 C20 C19 123.4(4) . . ?
 O2 C20 C21 117.6(4) . . ?
 C21 C20 C19 119.0(4) . . ?
 C20 C21 H21 119.7 . . ?
 C22 C21 C20 120.5(5) . . ?
 C22 C21 H21 119.7 . . ?
 O4 C22 C21 124.1(5) . . ?
 O4 C22 C23 114.9(4) . . ?
 C21 C22 C23 121.0(5) . . ?
 C22 C23 H23 120.5 . . ?
 C24 C23 C22 118.9(5) . . ?
 C24 C23 H23 120.5 . . ?
 C19 C24 H24 119.1 . . ?
 C23 C24 C19 121.8(5) . . ?
 C23 C24 H24 119.1 . . ?
 O4 C25 H25A 109.5 . . ?
 O4 C25 H25B 109.5 . . ?
 O4 C25 H25C 109.5 . . ?
 H25A C25 H25B 109.5 . . ?
 H25A C25 H25C 109.5 . . ?
 H25B C25 H25C 109.5 . . ?
 H5A O5 H5B 100.3 . . ?

loop_
  _geom_torsion_atom_site_label_1
  _geom_torsion_atom_site_label_2
  _geom_torsion_atom_site_label_3
  _geom_torsion_atom_site_label_4
  _geom_torsion
  _geom_torsion_site_symmetry_1
  _geom_torsion_site_symmetry_2
  _geom_torsion_site_symmetry_3
  _geom_torsion_site_symmetry_4
  _geom_torsion_publ_flag
 Ni1 O1 C8 C5 171.5(3) . . . . ?
 Ni1 O1 C8 C9 -5.4(7) . . . . ?
 Ni1 O2 C20 C19 6.3(6) . . . . ?
 Ni1 O2 C20 C21 -173.9(3) . . . . ?
 Ni1 N1 C10 C9 20.3(7) . . . . ?
 Ni1 N1 C10 C11 -156.4(4) . . . . ?
 Ni1 N1 C12 C13 -165.5(4) . . . . ?
 Ni1 N1 C12 C17 9.8(5) . . . . ?
 Ni1 N2 C17 C12 -3.9(5) . . . . ?
 Ni1 N2 C17 C16 173.8(4) . . . . ?
 Ni1 N2 C18 C19 7.3(6) . . . . ?
 O1 Ni1 O2 C20 -178.3(4) . . . . ?
 O1 Ni1 N1 C10 -24.2(4) . . . . ?
 O1 Ni1 N1 C12 167.3(3) . . . . ?
 O1 C8 C9 C10 -6.1(9) . . . . ?
 O2 Ni1 O1 C8 -156.9(4) . . . . ?
 O2 Ni1 N2 C17 -178.2(3) . . . . ?
 O2 Ni1 N2 C18 -5.0(4) . . . . ?
 O2 C20 C21 C22 -179.0(4) . . . . ?
 O3 C2 C3 C4 -178.2(5) . . . . ?
 O3 C2 C7 C6 179.3(5) . . . . ?
 O4 C22 C23 C24 176.6(4) . . . . ?
 N1 Ni1 O1 C8 17.2(4) . . . . ?
 N1 Ni1 N2 C17 7.6(3) . . . . ?
 N1 Ni1 N2 C18 -179.2(4) . . . . ?
 N1 C12 C13 C14 -179.2(5) . . . . ?
 N1 C12 C17 N2 -3.9(6) . . . . ?
 N1 C12 C17 C16 178.3(4) . . . . ?
 N2 Ni1 O2 C20 -1.6(4) . . . . ?
 N2 Ni1 N1 C10 158.9(4) . . . . ?
 N2 Ni1 N1 C12 -9.6(3) . . . . ?
 N2 C18 C19 C20 -2.3(7) . . . . ?
 N2 C18 C19 C24 176.5(4) . . . . ?
 C1 O3 C2 C3 179.4(5) . . . . ?
 C1 O3 C2 C7 0.1(8) . . . . ?
 C2 C3 C4 C5 -0.7(9) . . . . ?
 C3 C2 C7 C6 0.0(8) . . . . ?
 C3 C4 C5 C6 -0.9(8) . . . . ?
 C3 C4 C5 C8 177.3(5) . . . . ?
 C4 C5 C6 C7 2.1(8) . . . . ?
 C4 C5 C8 O1 164.0(5) . . . . ?
 C4 C5 C8 C9 -19.0(8) . . . . ?
 C5 C6 C7 C2 -1.7(8) . . . . ?
 C5 C8 C9 C10 177.2(5) . . . . ?
 C6 C5 C8 O1 -17.9(7) . . . . ?
 C6 C5 C8 C9 159.2(5) . . . . ?
 C7 C2 C3 C4 1.1(8) . . . . ?
 C8 C5 C6 C7 -176.2(5) . . . . ?
 C8 C9 C10 N1 -2.3(9) . . . . ?
 C8 C9 C10 C11 174.7(5) . . . . ?
 C10 N1 C12 C13 26.2(8) . . . . ?
 C10 N1 C12 C17 -158.5(5) . . . . ?
 C12 N1 C10 C9 -172.6(5) . . . . ?
 C12 N1 C10 C11 10.7(8) . . . . ?
 C12 C13 C14 C15 -1.3(8) . . . . ?
 C13 C12 C17 N2 171.8(4) . . . . ?
 C13 C12 C17 C16 -6.0(7) . . . . ?
 C13 C14 C15 C16 -3.1(9) . . . . ?
 C14 C15 C16 C17 2.9(8) . . . . ?
 C15 C16 C17 N2 -175.8(5) . . . . ?
 C15 C16 C17 C12 1.7(8) . . . . ?
 C17 N2 C18 C19 180.0(4) . . . . ?
 C17 C12 C13 C14 5.7(8) . . . . ?
 C18 N2 C17 C12 -177.4(4) . . . . ?
 C18 N2 C17 C16 0.3(7) . . . . ?
 C18 C19 C20 O2 -4.9(7) . . . . ?
 C18 C19 C20 C21 175.3(4) . . . . ?
 C18 C19 C24 C23 -175.6(4) . . . . ?
 C19 C20 C21 C22 0.9(7) . . . . ?
 C20 C19 C24 C23 3.2(7) . . . . ?
 C20 C21 C22 O4 -176.9(4) . . . . ?
 C20 C21 C22 C23 2.2(7) . . . . ?
 C21 C22 C23 C24 -2.5(7) . . . . ?
 C22 C23 C24 C19 -0.2(7) . . . . ?
 C24 C19 C20 O2 176.3(4) . . . . ?
 C24 C19 C20 C21 -3.5(6) . . . . ?
 C25 O4 C22 C21 2.7(7) . . . . ?
 C25 O4 C22 C23 -176.4(5) . . . . ?

_shelx_SHELXL_version_number      '2014/7'
loop_
  _refln_index_h
  _refln_index_k
  _refln_index_l
  _refln_F_squared_meas
  _refln_F_squared_sigma
  _refln_scale_group_code
 -4 0 0 234.339 8.5813 5
 4 0 0 224.972 7.88971 2
 4 0 0 220.933 7.87143 2
 -4 0 0 220.829 7.89891 2
 6 0 0 981.33 32.6717 2
 6 0 0 955.198 32.6546 2
 -6 0 0 960.337 32.6675 2
 -6 0 0 998.727 35.7121 5
 8 0 0 34.7051 3.06323 2
 8 0 0 36.4774 3.03982 2
 -8 0 0 34.3087 3.07651 5
 10 0 0 0.53802 1.76019 2
 10 0 0 -0.5157 1.67966 2
 -10 0 0 0.65696 2.1036 5
 12 0 0 310.742 11.5128 2
 12 0 0 307.036 11.4302 2
 -12 0 0 307.181 12.2752 5
 -14 0 0 111.177 6.14216 5
 14 0 0 115.967 5.86692 2
 14 0 0 116.344 5.83099 2
 16 0 0 29.2826 4.3145 2
 16 0 0 29.3106 4.4154 2
 -16 0 0 35.8406 4.7638 5
 18 0 0 160.263 8.28478 2
 -18 0 0 191.722 8.79891 5
 18 0 0 155.541 8.14743 2
 20 0 0 40.6988 4.70459 2
 20 0 0 29.7277 4.38355 2
 -22 0 0 -0.4606 5.5119 5
 22 0 0 -1.2829 3.2356 2
 22 0 0 1.44289 3.16487 2
 24 0 0 49.68 6.50017 2
 24 0 0 36.011 4.82604 2
 26 0 0 51.8954 7.41714 2
 28 0 0 79.6164 8.47918 2
 1 -1 0 9.78305 1.3576 5
 1 -1 0 10.7588 1.52718 6
 -1 -1 0 7.43412 1.26637 2
 -1 -1 0 8.20456 1.23607 3
 1 -1 0 6.7684 0.96264 4
 -1 -1 0 10.3849 1.3233 5
 1 -1 0 7.25671 0.88117 2
 -1 -1 0 10.458 1.54428 1
 -1 1 0 9.40808 1.41891 5
 -1 1 0 9.79221 1.52462 6
 -1 1 0 7.39036 0.92351 2
 1 1 0 9.02636 1.06018 5
 1 1 0 9.64567 1.53989 1
 -3 -1 0 556.605 18.7594 2
 3 -1 0 580.255 20.682 5
 3 -1 0 543.449 21.5068 6
 -3 -1 0 540.066 19.2502 3
 3 -1 0 541.93 18.6038 2
 3 1 0 565.198 19.2718 3
 -3 1 0 592.505 20.7004 5
 -3 1 0 541.137 18.8395 4
 -3 1 0 540.793 18.6015 2
 3 1 0 558.111 18.765 2
 5 -1 0 89.39 3.84515 2
 -5 -1 0 89.2511 4.43018 2
 -5 1 0 97.5764 4.90874 5
 -5 1 0 93.7412 3.9501 2
 5 1 0 94.0011 3.94111 3
 5 1 0 94.5656 4.40346 2
 -7 -1 0 7.21706 1.95255 2
 7 -1 0 10.7791 1.61184 2
 7 -1 0 13.1422 1.60952 2
 -7 -1 0 8.47868 1.30516 5
 -7 1 0 10.2835 1.67322 2
 7 1 0 8.74227 1.9087 2
 -7 1 0 10.5411 2.44079 5
 -9 -1 0 25.7898 3.399 2
 9 -1 0 28.5946 2.80593 2
 9 -1 0 26.8486 2.81203 2
 -9 -1 0 22.007 2.3051 5
 -9 1 0 21.7916 3.74575 5
 9 1 0 24.4799 3.2059 2
 11 -1 0 70.9832 4.01253 2
 -11 -1 0 64.5868 4.67172 2
 -11 -1 0 57.9633 3.69984 5
 11 -1 0 69.824 3.93376 2
 -11 1 0 56.2258 4.86678 5
 11 1 0 65.5138 4.25814 2
 13 -1 0 18.6148 2.52355 2
 -13 -1 0 12.8243 2.89358 2
 -13 -1 0 12.9159 2.49776 5
 13 -1 0 15.7584 2.43103 2
 13 1 0 13.639 2.71159 2
 -13 1 0 10.9529 3.27901 5
 13 1 0 18.5909 2.67058 2
 15 -1 0 -0.4108 2.27853 2
 -15 -1 0 1.2249 2.57991 5
 15 -1 0 1.61776 2.23988 2
 15 1 0 3.41622 2.41147 2
 -15 1 0 -1.9437 3.38594 5
 15 1 0 1.55498 2.28072 2
 -17 -1 0 82.5738 5.54571 5
 17 -1 0 62.3831 5.36238 2
 17 -1 0 64.1417 5.30754 2
 17 1 0 68.6212 5.70617 2
 -17 1 0 72.2695 6.36025 5
 17 1 0 70.9777 5.67928 2
 19 -1 0 6.27884 3.73136 2
 19 1 0 8.14659 3.71275 2
 19 1 0 15.0738 3.78658 2
 21 -1 0 -5.7241 3.14376 2
 -21 1 0 7.98277 5.19062 5
 21 1 0 -5.8001 3.23854 2
 21 1 0 -2.7798 3.41072 2
 23 -1 0 5.07407 3.51055 2
 23 -1 0 2.89807 3.50186 2
 23 1 0 -2.9571 3.32308 2
 23 1 0 2.68673 3.37798 2
 25 -1 0 2.22997 4.02109 2
 25 -1 0 0.17221 4.00461 2
 25 1 0 6.6588 3.78035 2
 -25 1 0 -0.8171 7.26347 5
 27 -1 0 6.21276 4.46426 2
 27 -1 0 11.7067 4.89748 2
 0 -2 0 9999.99 337.321 1
 0 -2 0 8844.16 305.986 2
 0 2 0 9411.82 337.393 1
 0 2 0 9453.63 351.6 6
 0 2 0 8637.26 306.134 2
 0 2 0 9110.59 336.272 5
 2 -2 0 115.137 4.39838 4
 2 -2 0 93.7137 5.39687 6
 -2 -2 0 116.87 4.76153 3
 -2 -2 0 88.321 4.12955 2
 -2 -2 0 83.6303 5.22908 1
 2 2 0 91.418 4.15272 2
 -2 2 0 98.72 5.12192 5
 -2 2 0 91.94 5.48776 6
 2 2 0 107.265 5.15638 1
 2 2 0 90.6619 4.39922 5
 -4 -2 0 4.48986 1.83642 3
 4 -2 0 4.23941 2.43462 6
 4 -2 0 9.11643 1.60911 2
 -4 2 0 7.26141 1.31765 2
 4 2 0 6.88781 1.87426 3
 -4 2 0 5.4781 1.59459 4
 -4 2 0 0.85072 2.46178 5
 -6 -2 0 287.841 10.8367 3
 6 -2 0 293.945 12.435 6
 6 -2 0 304.226 10.3908 2
 -6 -2 0 289.821 10.7706 2
 6 2 0 313.364 10.9277 3
 6 2 0 285.497 10.7692 2
 -6 2 0 304.945 10.3791 2
 -6 2 0 291.951 10.7211 4
 -6 2 0 297.928 12.0467 5
 8 -2 0 25.2793 2.55444 2
 -8 -2 0 21.9006 2.61705 2
 -8 2 0 23.4033 3.34148 5
 8 2 0 25.1703 2.87503 3
 -8 2 0 22.9187 2.75544 2
 8 2 0 24.8461 2.65254 2
 10 -2 0 9.38002 1.89552 2
 -10 -2 0 2.73599 2.43112 2
 10 2 0 0.36346 2.33029 2
 -10 2 0 9.48471 2.12482 2
 10 2 0 5.89488 2.01713 3
 -10 2 0 1.6941 3.16756 5
 12 -2 0 91.3463 4.65022 2
 12 -2 0 88.683 4.57028 2
 -12 -2 0 85.7752 5.46273 2
 -12 2 0 74.6537 6.08782 5
 12 2 0 85.6522 4.49563 3
 12 2 0 80.8948 5.11101 2
 14 -2 0 106.391 5.39463 2
 14 -2 0 105.473 5.32247 2
 -14 -2 0 102.102 6.24283 2
 14 2 0 109.434 5.164 3
 14 2 0 98.5437 5.93875 2
 14 2 0 105.268 5.9541 2
 -14 2 0 84.8537 6.8701 5
 16 -2 0 65.7663 4.99101 2
 16 -2 0 67.4965 5.08485 2
 16 2 0 74.6458 4.48445 3
 -16 2 0 66.6491 6.57537 5
 16 2 0 69.8038 5.59982 2
 16 2 0 63.9605 5.68559 2
 18 -2 0 355.419 13.9757 2
 18 -2 0 327.866 13.8957 2
 18 2 0 368.853 14.5123 2
 -18 2 0 388.615 16.1652 5
 18 2 0 374.59 14.6055 2
 18 2 0 341.45 13.7596 3
 20 -2 0 33.7378 5.75551 2
 20 -2 0 39.4134 4.42733 2
 20 2 0 31.6073 4.935 3
 20 2 0 42.684 6.579 2
 20 2 0 44.1037 5.16628 2
 22 -2 0 21.9093 4.13021 2
 22 -2 0 20.6823 4.26388 2
 22 2 0 14.7285 4.22636 2
 22 2 0 27.8498 4.94996 3
 -22 2 0 36.2584 6.98626 5
 24 -2 0 50.8802 6.90951 2
 24 -2 0 43.4453 7.3937 2
 24 2 0 45.7915 7.03323 2
 24 2 0 44.0728 7.36347 2
 26 -2 0 18.7428 5.35889 2
 26 -2 0 17.7071 4.79915 2
 26 2 0 18.7236 4.8648 2
 28 -2 0 23.7071 6.63718 2
 28 2 0 28.3693 5.27027 2
 -1 -3 0 126.841 5.83529 3
 -1 -3 0 108.691 4.7579 2
 1 -3 0 119.666 6.38731 1
 -1 -3 0 121.54 6.32349 1
 1 -3 0 116.507 4.60519 2
 1 3 0 116.577 6.01839 1
 -1 3 0 118.092 6.63475 6
 1 3 0 106.18 5.54523 5
 -1 3 0 112.107 6.00245 5
 1 3 0 117.492 6.55704 6
 -1 3 0 121.925 4.65515 2
 1 3 0 114.631 4.86324 2
 3 -3 0 49.52 3.68461 4
 -3 -3 0 47.7544 3.30661 2
 3 -3 0 45.8126 2.48998 2
 3 -3 0 47.5086 4.53843 6
 -3 -3 0 42.9256 3.70244 3
 3 -3 0 34.5101 4.42507 1
 3 3 0 51.2458 4.434 1
 -3 3 0 52.5132 2.62127 2
 -3 3 0 37.7197 4.74181 6
 3 3 0 40.6817 3.05673 2
 5 -3 0 163.799 6.956 4
 5 -3 0 162.634 6.04476 2
 -5 -3 0 169.808 7.0752 3
 -5 -3 0 159.3 6.71984 2
 5 -3 0 165.118 8.16481 6
 -5 3 0 172.432 6.85884 4
 -5 3 0 170.628 6.13242 2
 5 3 0 160.689 7.76822 1
 5 3 0 148.116 6.67119 2
 -5 3 0 161.202 7.83043 5
 7 -3 0 120.965 4.86349 2
 -7 -3 0 112.561 5.77598 2
 7 -3 0 117.628 6.75227 6
 -7 -3 0 117.677 5.70654 3
 -7 3 0 119.72 5.62241 4
 7 3 0 123.372 5.75742 3
 -7 3 0 114.741 4.90488 2
 -7 3 0 109.997 6.59358 5
 7 3 0 111.54 5.64461 2
 9 -3 0 153.061 6.07927 2
 9 -3 0 152.381 7.97296 6
 -9 -3 0 143.647 6.94727 2
 9 3 0 144.201 6.96834 2
 -9 3 0 139.177 8.0524 5
 -9 3 0 153.083 6.15293 2
 9 3 0 159.981 6.85409 3
 -9 3 0 152.538 6.82616 4
 -11 -3 0 616.178 22.0143 2
 11 -3 0 617.978 21.5666 2
 11 -3 0 629.109 25.3727 6
 -11 3 0 600.276 24.3538 5
 -11 3 0 622.455 22.1303 4
 11 3 0 635.401 22.0828 2
 11 3 0 637.906 22.4377 3
 -11 3 0 617.878 21.4244 2
 13 -3 0 209.147 8.23766 2
 13 -3 0 201.409 8.51748 2
 13 -3 0 202.326 10.4777 6
 -13 -3 0 209.237 9.17717 2
 -13 3 0 195.796 8.31312 2
 13 3 0 214.636 9.26712 2
 13 3 0 210.491 8.71568 3
 -13 3 0 200.257 10.4815 5
 -13 3 0 205.365 9.25374 4
 15 -3 0 121.179 6.22771 2
 15 -3 0 109.185 6.32611 2
 15 -3 0 110.672 8.08626 6
 -15 -3 0 120.535 7.24357 2
 15 3 0 120.792 6.9466 2
 15 3 0 113.156 7.53761 2
 15 3 0 116.203 6.27198 3
 -15 3 0 129.775 8.46112 5
 -15 3 0 115.417 7.49868 4
 17 -3 0 315.465 12.3672 2
 -17 -3 0 327.934 13.2544 2
 17 -3 0 286.697 12.391 2
 -17 3 0 329.172 15.1746 5
 17 3 0 277.076 12.3366 3
 17 3 0 327.061 13.4717 2
 17 3 0 299.061 12.9574 2
 19 -3 0 170.262 9.40005 2
 19 -3 0 181.555 9.34586 2
 19 3 0 180.751 9.03048 3
 19 3 0 187.202 9.96786 2
 -19 3 0 216.279 12.1703 5
 19 3 0 193.068 10.232 2
 21 -3 0 -0.4501 4.07939 2
 21 -3 0 -3.5127 3.61775 2
 21 3 0 -3.2703 3.84598 2
 21 3 0 0.05858 3.75813 3
 23 -3 0 7.31402 4.28511 2
 23 -3 0 5.73872 4.72968 2
 23 3 0 9.18813 4.26842 3
 23 3 0 4.30791 4.28109 2
 25 -3 0 11.5744 4.74674 2
 25 -3 0 5.75334 5.68436 2
 25 3 0 -0.6595 4.56648 2
 27 3 0 10.4071 4.90287 2
 0 -4 0 299.383 12.6093 1
 0 -4 0 276.776 10.2854 2
 0 -4 0 294.419 11.5731 3
 0 4 0 300.285 13.0664 6
 0 4 0 265.641 11.8733 5
 2 -4 0 123.289 6.06233 4
 -2 -4 0 135.39 6.61036 3
 2 -4 0 126.327 5.19894 2
 2 -4 0 121.182 7.36705 1
 -2 -4 0 134.459 5.55671 2
 -2 -4 0 121.504 7.22048 1
 -2 4 0 123.85 7.70833 6
 -2 4 0 141.114 5.27336 2
 2 4 0 133.856 5.65349 2
 -2 4 0 120.368 7.02462 5
 2 4 0 123.725 7.71275 6
 2 4 0 111.406 6.27077 5
 2 4 0 130.393 7.0532 1
 4 -4 0 40.5527 4.44582 4
 -4 -4 0 36.0938 4.33071 3
 4 -4 0 38.8077 4.82168 1
 4 -4 0 37.3105 2.75698 2
 4 -4 0 36.1598 5.24941 6
 -4 -4 0 35.0654 3.62979 2
 -4 4 0 35.0066 5.07306 5
 -4 4 0 29.8669 4.93332 6
 4 4 0 44.3821 4.79706 1
 -4 4 0 43.0968 2.84996 2
 -6 -4 0 28.2555 3.88152 2
 6 -4 0 29.1104 4.55582 6
 6 -4 0 35.2771 4.33289 4
 -6 -4 0 24.6397 4.07199 3
 6 4 0 28.3348 3.93085 2
 6 4 0 31.3961 4.86534 1
 -6 4 0 30.1223 4.28674 5
 -6 4 0 21.4376 2.84081 2
 -8 -4 0 106.34 6.30802 3
 -8 -4 0 111.43 6.34408 2
 8 -4 0 117.699 7.54217 6
 -8 4 0 113.091 6.26438 4
 -8 4 0 114.701 5.16823 2
 -8 4 0 121.794 7.70798 5
 8 4 0 133.151 7.08273 1
 8 4 0 117.492 6.56846 2
 -10 -4 0 87.4799 6.05123 2
 10 -4 0 101.884 7.30803 6
 -10 4 0 90.3442 7.39467 5
 10 4 0 83.9437 5.93234 2
 -10 4 0 89.186 5.80625 4
 10 4 0 94.7549 6.69568 1
 -10 4 0 84.9816 4.8431 2
 12 -4 0 44.7358 4.17289 2
 12 -4 0 49.1007 6.48264 6
 -12 -4 0 45.8783 5.61066 2
 -12 4 0 50.5897 7.31127 5
 -12 4 0 44.7771 4.2709 2
 12 4 0 52.7603 5.67577 2
 -12 4 0 53.3839 5.36553 4
 14 -4 0 7.45018 5.073 6
 -14 -4 0 -0.4901 3.76122 2
 14 -4 0 2.93231 2.77845 2
 14 -4 0 -1.3199 2.99584 2
 14 4 0 2.80878 3.3373 3
 -14 4 0 -1.483 3.48465 4
 14 4 0 6.87227 3.60153 2
 -14 4 0 4.07757 5.09085 5
 16 -4 0 8.55165 3.11947 2
 -16 -4 0 9.42488 4.29316 2
 16 -4 0 7.09651 3.68575 2
 16 -4 0 11.4751 5.69723 6
 16 4 0 1.533 3.65562 3
 -16 4 0 6.87977 5.96161 5
 -16 4 0 4.27524 4.07302 4
 16 4 0 13.4143 4.14463 2
 16 4 0 6.5243 3.93863 2
 18 -4 0 64.014 8.73248 6
 18 -4 0 68.2319 6.44483 2
 -18 -4 0 73.2623 7.94501 2
 18 -4 0 57.1904 6.56495 2
 18 4 0 86.681 7.4538 2
 -18 4 0 58.1732 7.76521 4
 -18 4 0 80.7747 9.65388 5
 18 4 0 60.4136 7.53254 2
 18 4 0 62.8735 6.55517 3
 20 -4 0 7.06466 3.83859 2
 20 -4 0 4.95822 6.58908 6
 20 4 0 8.04965 4.59303 2
 20 4 0 8.52522 4.27254 3
 -20 4 0 1.82176 4.81967 4
 22 -4 0 -1.2709 6.61806 6
 22 -4 0 2.84068 5.11778 2
 22 4 0 -1.8023 4.37363 3
 22 4 0 2.55925 4.37194 2
 24 -4 0 5.2672 6.04903 2
 24 -4 0 10.8938 7.89923 6
 -24 4 0 1.48188 8.47271 5
 24 4 0 -0.341 4.738 2
 -1 -5 0 8.04798 2.4802 2
 -1 -5 0 2.50061 4.25894 1
 1 -5 0 6.96748 2.27746 2
 1 -5 0 1.7105 4.39799 1
 1 -5 0 2.85168 2.89988 4
 -1 -5 0 3.05548 3.40054 3
 1 -5 0 4.11382 3.49024 3
 1 5 0 -1.0652 3.39736 5
 1 5 0 4.1814 4.87911 6
 -1 5 0 0.23303 4.83101 6
 -1 5 0 2.34496 3.55907 5
 -1 5 0 1.0663 2.08266 2
 -3 -5 0 -3.2683 3.26808 3
 3 -5 0 -3.1595 2.96732 4
 3 -5 0 -0.6979 2.11027 2
 -3 -5 0 2.39566 2.69466 2
 -3 5 0 -0.097 3.71775 5
 -3 5 0 -4.6498 4.68635 6
 3 5 0 2.60805 3.67372 1
 -3 5 0 -2.2983 2.07813 2
 3 5 0 -3.0115 4.77741 6
 5 -5 0 120.512 7.0586 4
 -5 -5 0 116.698 7.04855 3
 5 -5 0 109.683 7.69158 1
 -5 -5 0 134.421 6.51822 2
 5 -5 0 103.115 5.23806 2
 5 5 0 107.866 8.25152 6
 -5 5 0 129.636 5.59772 2
 -5 5 0 128.321 7.80456 5
 -5 5 0 102.442 8.3124 6
 5 5 0 111.9 7.38654 1
 -7 -5 0 217.197 9.29907 2
 7 -5 0 202.395 10.4212 1
 7 -5 0 201.018 11.269 6
 -7 -5 0 195.49 9.72685 3
 -7 5 0 202.44 10.4907 5
 7 5 0 208.565 10.461 1
 -7 5 0 199.713 7.9977 2
 9 -5 0 152.424 10.1288 6
 -9 -5 0 145.953 8.32298 3
 -9 -5 0 169.792 8.56673 2
 9 5 0 164.963 9.50549 1
 -9 5 0 153.741 6.80811 2
 -9 5 0 179.278 10.2877 5
 -11 -5 0 305.496 12.8597 2
 11 -5 0 303.316 15.1819 6
 -11 5 0 331.501 14.908 5
 -11 5 0 292.297 11.4515 2
 11 5 0 303.053 14.0341 1
 -11 5 0 294.49 12.7843 4
 13 -5 0 92.3951 5.81578 2
 13 -5 0 81.2227 8.85591 6
 -13 -5 0 84.5157 7.71789 2
 -13 5 0 86.3077 5.63901 2
 -13 5 0 87.7197 9.75164 5
 13 5 0 87.0541 7.69659 1
 -13 5 0 82.0596 7.33512 4
 15 -5 0 47.3935 5.54745 2
 -15 -5 0 46.501 6.26701 2
 15 -5 0 45.5464 8.66885 6
 -15 5 0 36.1148 5.44861 4
 -15 5 0 48.1332 7.75964 5
 15 5 0 38.206 4.94168 2
 15 5 0 34.5808 6.36704 1
 17 -5 0 56.2945 9.72102 6
 17 -5 0 40.6738 5.9703 2
 -17 -5 0 48.9566 7.71362 2
 -17 5 0 27.8845 5.56576 4
 17 5 0 32.2525 5.55682 2
 -19 5 0 69.5991 10.9189 5
 -19 5 0 61.1057 8.90569 4
 19 5 0 48.225 7.90984 2
 21 -5 0 -2.7853 7.41509 6
 21 5 0 4.42484 4.90031 2
 -21 5 0 0.4501 5.90398 4
 23 5 0 -4.9078 5.41689 2
 -23 5 0 -5.1545 6.58575 4
 0 -6 0 -5.3121 4.13215 4
 0 -6 0 9.04253 5.40083 1
 0 -6 0 8.74938 3.36172 2
 0 -6 0 -0.0091 4.02007 3
 0 6 0 0.19683 5.75725 6
 -2 -6 0 1.34064 4.16087 3
 2 -6 0 -4.9377 2.84337 2
 2 -6 0 -2.8713 4.06593 3
 -2 6 0 -6.6263 6.06922 6
 2 6 0 0.6218 6.21157 6
 -2 6 0 2.95393 4.75358 5
 4 -6 0 9.18529 2.92543 2
 -4 -6 0 7.67942 4.52275 3
 4 -6 0 10.6044 4.20463 4
 4 6 0 14.1213 6.45062 6
 -6 -6 0 16.5395 4.85941 3
 -8 -6 0 3.51058 4.71045 3
 8 6 0 7.59786 6.38261 6
 8 6 0 13.1876 4.9731 1
 -10 -6 0 4.34436 4.93427 2
 10 -6 0 12.8503 5.56769 1
 10 -6 0 23.0148 7.15004 6
 -10 -6 0 8.1747 4.74618 3
 10 6 0 7.67643 5.08205 1
 12 -6 0 4.86293 6.96321 6
 -12 -6 0 -2.6451 5.10742 2
 12 6 0 6.54056 5.40631 1
 -12 6 0 13.194 6.73399 5
 14 -6 0 0.56279 6.95836 6
 -14 -6 0 9.80574 6.10749 2
 14 6 0 -4.8696 4.61217 2
 14 6 0 -0.2994 5.30679 1
 -16 -6 0 15.917 6.16585 2
 16 -6 0 6.1086 6.92582 6
 16 6 0 -0.2631 5.73204 2
 16 6 0 2.22732 5.64062 1
 -16 6 0 2.61119 5.61549 4
 18 -6 0 5.78993 7.27369 6
 18 6 0 1.60136 5.52665 2
 18 6 0 8.83068 6.23467 1
 -18 6 0 1.44411 8.00023 5
 -18 6 0 7.92957 6.42123 4
 20 -6 0 -0.6028 8.1441 6
 20 6 0 6.70804 6.14675 2
 -20 6 0 -0.8189 6.89574 4
 20 6 0 -3.265 6.85541 1
 -1 -7 0 -3.9327 4.44425 3
 -1 -7 0 2.40754 5.50232 1
 1 -7 0 1.53036 5.56558 1
 -1 -7 0 -9.3925 4.68637 4
 1 -7 0 -1.3684 4.77529 3
 -1 7 0 0.0446 6.68839 6
 1 7 0 -8.7531 7.32796 6
 3 -7 0 -1.329 4.75446 3
 -3 -7 0 -3.8971 4.77306 3
 3 -7 0 -5.3299 5.0716 4
 3 -7 0 -9.4786 5.49041 1
 -3 7 0 11.2047 7.16102 6
 3 7 0 0.82921 7.5914 6
 5 -7 0 24.0723 5.48772 3
 5 -7 0 37.963 7.47432 1
 -5 -7 0 18.3051 5.52611 3
 5 -7 0 26.088 5.85999 4
 5 7 0 31.2 8.64457 6
 7 -7 0 53.094 7.25668 3
 7 -7 0 70.9396 7.90668 1
 -7 -7 0 61.4489 7.85875 3
 -7 -7 0 79.6497 8.88591 2
 7 7 0 81.1129 10.5899 6
 7 7 0 55.4927 7.45545 1
 -7 7 0 90.3687 9.99667 5
 9 -7 0 56.4527 8.00774 1
 -9 -7 0 47.8204 8.08044 3
 -9 -7 0 66.9039 9.47539 2
 9 -7 0 63.2992 7.99009 3
 9 7 0 51.1876 7.50401 1
 -11 -7 0 77.38 9.99659 2
 11 -7 0 87.2508 8.90583 1
 11 7 0 66.5015 10.7818 6
 11 7 0 51.3366 7.98173 1
 -13 -7 0 34.3227 8.02075 2
 13 -7 0 41.6478 7.2434 1
 13 -7 0 52.3206 10.4589 6
 13 7 0 39.1905 6.12519 2
 13 7 0 34.4969 6.66758 1
 15 -7 0 -1.3458 5.9987 1
 -15 -7 0 4.93557 7.65484 2
 15 7 0 2.28176 6.35166 1
 15 7 0 1.97585 6.5998 2
 0 -8 0 4.27653 7.07927 4
 0 -8 0 3.48182 5.59019 3
 0 8 0 15.5697 8.04749 6
 2 -8 0 21.0515 6.84972 1
 -2 -8 0 12.0653 7.03687 4
 2 -8 0 16.9327 7.0047 4
 2 -8 0 13.7541 5.62406 3
 -2 -8 0 10.6361 6.28535 3
 2 8 0 22.7157 8.68774 6
 -2 8 0 27.8595 8.94343 6
 4 -8 0 5.17749 5.45229 3
 -4 -8 0 9.08354 5.97772 3
 4 -8 0 14.1133 6.4767 1
 4 -8 0 9.93161 7.09042 4
 4 8 0 10.9742 9.81277 6
 6 -8 0 8.89256 5.66705 1
 6 -8 0 11.0107 5.6898 3
 -6 -8 0 18.3054 6.29669 3
 8 -8 0 12.571 6.33419 1
 -8 -8 0 4.74708 6.81316 3
 8 -8 0 17.6599 6.01552 3
 8 8 0 16.2838 10.3771 6
 -10 -8 0 -6.1631 6.86186 3
 10 -8 0 10.2155 6.61757 3
 10 -8 0 14.8322 6.28511 1
 10 8 0 7.20121 6.1675 1
 28 0 -1 -6.1288 3.86367 2
 28 0 -1 7.3899 4.1782 2
 26 0 -1 0.08153 3.73431 2
 24 0 -1 4.41155 3.59427 2
 24 0 -1 2.05693 3.5608 2
 -24 0 1 -2.8215 5.67804 5
 -22 0 1 4.06976 4.79221 5
 22 0 -1 -3.5036 3.21939 2
 22 0 -1 -5.0789 3.27402 2
 -20 0 1 1.00103 4.11512 5
 18 0 -1 -2.8086 2.67563 2
 18 0 -1 -3.1658 2.53306 2
 -18 0 1 -5.1431 3.51783 5
 16 0 -1 -0.7074 2.31316 2
 -16 0 1 1.42079 3.01014 5
 16 0 -1 -1.1307 2.33177 2
 14 0 -1 -0.6216 2.11265 2
 14 0 -1 -0.6526 2.15114 2
 -14 0 1 -2.2011 2.74183 5
 12 0 -1 2.02107 1.9794 2
 12 0 -1 -0.9639 1.99254 2
 -12 0 1 2.07771 2.52575 5
 10 0 -1 -2.3097 1.66509 2
 10 0 -1 1.47566 1.71531 2
 -10 0 1 0.91696 2.11949 5
 -8 0 1 1.43916 1.63686 2
 8 0 -1 -0.6617 1.56541 2
 8 0 -1 -1.0483 1.4812 2
 -6 0 1 -0.0844 1.61146 2
 6 0 -1 -0.5043 1.55902 2
 6 0 -1 0.39176 1.46992 2
 4 0 -1 0.06665 0.88987 2
 -4 0 1 0.24985 0.94239 2
 2 0 1 -0.6921 0.76358 2
 -4 0 -1 -1.2408 1.48914 2
 4 0 1 -0.4662 1.50868 5
 -4 0 -1 -1.0911 1.52757 5
 4 0 1 -0.6228 1.3815 2
 -6 0 -1 -2.6814 1.58564 2
 -6 0 -1 -0.7409 1.78883 5
 6 0 1 -1.793 1.55233 2
 6 0 1 0.04253 1.73378 5
 -8 0 -1 -1.4562 1.77694 2
 -8 0 -1 -0.6162 1.95712 5
 8 0 1 -1.3573 1.61144 2
 8 0 1 -1.3757 1.64119 2
 10 0 1 -1.6627 1.85281 2
 -10 0 -1 -3.8698 2.2793 5
 -10 0 -1 -3.2062 2.0225 2
 10 0 1 -3.5901 1.85137 2
 12 0 1 -1.2004 2.03407 2
 12 0 1 -3.1349 2.13741 2
 14 0 1 1.52137 2.26987 2
 14 0 1 2.14999 2.27769 2
 -14 0 -1 -3.201 2.89406 5
 16 0 1 -3.386 2.37243 2
 16 0 1 -3.8038 2.45738 2
 -16 0 -1 -2.1365 3.36734 5
 -18 0 -1 12.0938 4.38773 5
 -20 0 -1 10.4885 5.18043 5
 22 0 1 -2.6218 3.4083 2
 24 0 1 -6.4428 3.77123 2
 24 0 1 6.33958 3.90837 2
 26 0 1 10.4882 4.40607 2
 28 0 1 4.11944 4.96548 2
 29 -1 -1 10.6045 5.57882 2
 29 1 -1 4.77373 4.83152 2
 27 -1 -1 26.292 5.19139 2
 27 -1 -1 23.9185 4.85464 2
 27 1 -1 28.2128 4.82176 2
 25 -1 -1 19.3482 4.2769 2
 25 -1 -1 21.7916 4.42107 2
 25 1 -1 28.9063 4.69071 2
 -25 1 1 23.5229 7.23159 5
 23 -1 -1 33.7359 4.46248 2
 23 -1 -1 35.7142 4.75257 2
 -23 1 1 34.7801 6.24491 5
 23 1 -1 36.4482 4.86691 2
 23 1 -1 35.2359 4.56432 2
 21 -1 -1 117.021 7.54462 2
 21 -1 -1 133.683 7.68077 2
 21 1 -1 124.699 7.91953 2
 21 1 -1 109.874 7.75754 2
 19 -1 -1 37.0295 5.46601 2
 19 -1 -1 53.0955 5.52648 2
 19 1 -1 46.4886 5.65844 2
 19 1 -1 53.7089 5.80515 2
 -17 -1 1 280.976 11.2475 5
 17 -1 -1 272.083 10.7809 2
 17 -1 -1 273.879 10.7754 2
 17 1 -1 265.781 10.9766 2
 17 1 -1 257.165 10.9687 2
 -17 1 1 275.638 12.0055 5
 -15 -1 1 160.243 7.19113 5
 15 -1 -1 161.328 7.09353 2
 15 -1 -1 166.224 7.21375 2
 15 1 -1 158.541 7.42279 2
 -15 1 1 162.427 8.10209 5
 15 1 -1 164.03 7.4544 2
 13 -1 -1 30.4671 3.46262 2
 13 -1 -1 25.3328 3.5238 2
 -13 -1 1 18.9307 3.21594 5
 13 1 -1 25.1366 3.11238 2
 -13 1 1 23.2268 3.63737 5
 13 1 -1 22.9133 3.68127 2
 -11 -1 1 24.4426 2.78812 5
 11 -1 -1 26.021 3.09432 2
 11 -1 -1 27.3558 3.0112 2
 11 1 -1 20.8218 3.337 2
 -11 1 1 21.484 2.53266 2
 11 1 -1 18.0679 2.7622 2
 -11 1 1 23.7435 3.27469 5
 -9 -1 1 75.7067 4.16897 2
 9 -1 -1 76.7257 3.74991 2
 -9 1 1 73.1474 3.93269 2
 9 1 -1 73.2924 4.08225 2
 -9 1 1 79.3772 4.79816 5
 9 1 -1 69.6618 4.11159 2
 -7 -1 1 0.34405 1.69414 2
 7 -1 -1 3.9684 1.41048 2
 -7 1 1 1.84086 2.3551 5
 7 1 -1 0.26807 1.6091 2
 -7 1 1 3.17542 1.61428 2
 7 1 -1 1.07184 1.67582 2
 5 -1 -1 11.8202 2.11828 2
 -5 -1 1 12.9465 1.85142 2
 5 1 -1 13.8784 1.84896 2
 -5 1 1 12.8749 2.23475 2
 -3 -1 1 626.541 21.4051 3
 3 -1 -1 618.122 23.7965 6
 -3 -1 1 617.089 20.7272 2
 3 -1 -1 624.933 20.6864 2
 3 1 -1 640.998 21.4213 3
 3 1 -1 605.832 20.7215 2
 -3 1 1 586.507 20.7768 4
 -3 1 1 625.331 20.695 2
 -3 1 1 617.831 23.7939 6
 -1 -1 1 969.902 33.1794 3
 -1 -1 1 951.076 36.7594 6
 -1 -1 1 914.203 35.2152 5
 -1 -1 1 950.612 32.0169 2
 -1 -1 1 961.358 35.4004 1
 1 -1 -1 924.787 32.1102 2
 1 1 -1 1004 35.4174 1
 -1 1 1 972.521 32.1173 2
 1 1 -1 923.94 32.0184 2
 1 1 -1 1024.76 33.1975 3
 1 1 -1 1000.29 36.7891 6
 1 -1 1 1889.44 69.0422 5
 -1 -1 -1 1864.02 62.8938 2
 1 -1 1 1919.11 63.2777 4
 1 -1 1 1864.41 72.8396 6
 1 1 1 1848.71 62.8974 2
 1 1 1 1961.71 69.2146 1
 -1 1 -1 1948.68 63.2851 4
 -1 1 -1 1875.16 69.128 5
 3 -1 1 444.733 16.7659 5
 3 -1 1 436.168 14.9416 2
 -3 -1 -1 434.572 15.2086 2
 -3 -1 -1 462.393 15.4802 3
 3 -1 1 430.301 14.9374 2
 -3 1 -1 436.994 15.2929 4
 3 1 1 440.808 15.2339 2
 3 1 1 469.945 15.4999 3
 -3 1 -1 452.491 16.7768 5
 -3 1 -1 438.779 14.9617 2
 -5 -1 -1 292.684 10.8932 2
 5 -1 1 307.148 10.6272 2
 5 -1 1 306.856 12.0092 5
 5 -1 1 302.524 10.6145 2
 -5 1 -1 309.925 12.0397 5
 5 1 1 304.355 10.9026 2
 5 1 1 320.91 10.8354 3
 7 -1 1 1.39783 1.47485 2
 -7 -1 -1 -0.2768 1.87423 2
 7 -1 1 3.4313 2.20548 5
 7 -1 1 1.00636 1.43557 2
 -7 1 -1 0.3656 2.3411 5
 7 1 1 0.71707 1.77309 2
 -9 -1 -1 -1.6119 2.07683 2
 9 -1 1 0.34412 1.66747 2
 9 -1 1 1.06378 1.70036 2
 9 1 1 -1.6343 1.98254 2
 -9 1 -1 -0.9145 2.58851 5
 -11 -1 -1 145.735 6.78903 2
 11 -1 1 144.873 6.28252 2
 -11 -1 -1 137.654 6.30807 5
 11 -1 1 160.096 6.34928 2
 11 1 1 148.472 6.69684 2
 -11 1 -1 137.967 7.4032 5
 13 -1 1 271.696 10.3082 2
 13 -1 1 260.304 10.1605 2
 -13 -1 -1 267.502 10.6902 2
 13 1 1 272.355 10.6696 2
 -13 1 -1 258.881 11.4965 5
 13 1 1 279.274 10.5758 2
 15 -1 1 -0.2072 2.30576 2
 15 -1 1 -1.8235 2.19479 2
 15 1 1 -2.2102 2.42675 2
 -15 1 -1 -4.8421 3.50038 5
 15 1 1 -4.2752 2.40077 2
 17 -1 1 34.1381 3.91738 2
 17 -1 1 28.6005 4.82884 2
 17 1 1 33.3859 5.16885 2
 17 1 1 39.2564 5.27721 2
 19 -1 1 13.8761 3.77289 2
 19 1 1 13.4415 4.01918 2
 19 1 1 13.8368 3.91239 2
 21 -1 1 7.9101 3.57366 2
 21 -1 1 5.09212 3.37776 2
 -21 1 -1 12.4992 6.02275 5
 21 1 1 4.23662 3.81799 2
 21 1 1 2.40955 3.62898 2
 23 -1 1 25.355 4.5279 2
 23 -1 1 16.8109 4.12395 2
 23 1 1 28.531 4.72935 2
 25 -1 1 15.3958 4.39474 2
 25 -1 1 6.35399 4.3722 2
 25 1 1 16.1066 4.22259 2
 27 -1 1 84.6161 9.9432 2
 27 -1 1 56.0647 9.33304 2
 27 1 1 87.319 8.37255 2
 28 -2 -1 26.8951 6.51777 2
 28 -2 -1 24.3993 5.49041 2
 28 2 -1 19.6469 4.92432 2
 26 -2 -1 36.6525 5.82487 2
 26 -2 -1 32.5803 5.40359 2
 -26 2 1 40.9736 8.99513 5
 26 2 -1 43.6746 7.09214 2
 26 2 -1 23.6547 4.71817 2
 24 -2 -1 23.9884 4.40933 2
 24 -2 -1 23.963 4.89503 2
 24 2 -1 29.8392 4.76372 3
 24 2 -1 32.5174 5.13057 2
 22 -2 -1 2.26212 3.71273 2
 22 -2 -1 -0.9955 3.32784 2
 22 2 -1 -0.0951 3.57075 2
 22 2 -1 1.67201 3.93139 2
 -22 2 1 4.09931 5.41984 5
 20 -2 -1 0.51206 3.36851 2
 -20 2 1 15.1153 5.41662 5
 20 2 -1 3.86196 3.70051 2
 18 -2 -1 50.1216 5.31613 2
 18 2 -1 54.9692 5.98375 2
 -18 2 1 57.5219 6.68931 5
 18 2 -1 54.8204 5.94589 2
 -16 -2 1 7.93273 2.34323 5
 16 -2 -1 10.682 2.6945 2
 16 -2 -1 10.9318 2.69461 2
 -16 2 1 9.58932 3.92751 5
 16 2 -1 13.0432 3.12887 2
 16 2 -1 10.2841 2.961 2
 14 -2 -1 3.1357 2.12382 2
 -14 -2 1 2.48591 2.78279 2
 14 -2 -1 2.93922 2.16036 2
 14 2 -1 1.30242 2.56117 2
 -14 2 1 3.34371 2.5918 2
 -14 2 1 -4.6918 3.4984 5
 14 2 -1 -0.6279 2.3617 3
 14 2 -1 5.77315 2.58879 2
 -12 -2 1 31.3333 4.37848 2
 12 -2 -1 40.5859 3.44788 2
 12 2 -1 38.4794 3.41813 3
 12 2 -1 36.3991 4.22344 2
 12 2 -1 25.0388 3.15087 2
 -12 2 1 28.8355 5.11893 5
 -12 2 1 35.0198 3.71359 2
 -10 -2 1 9.01663 2.43901 2
 10 -2 -1 15.0726 2.68074 2
 -10 2 1 10.5153 2.18028 2
 -10 2 1 10.1774 3.2198 5
 10 2 -1 12.102 2.14134 3
 10 2 -1 11.0142 2.44593 2
 8 -2 -1 42.9093 4.0226 6
 -8 -2 1 42.3584 3.68786 2
 8 -2 -1 46.5882 2.95685 2
 8 2 -1 45.2202 3.63693 2
 8 2 -1 43.6397 3.28057 3
 -8 2 1 47.8604 3.0973 2
 -8 2 1 43.8093 4.62269 5
 6 -2 -1 91.0499 5.23584 6
 6 -2 -1 94.9819 3.96151 2
 -6 -2 1 86.827 4.5972 2
 -6 2 1 93.6902 4.27601 4
 -6 2 1 93.4619 4.07166 2
 6 2 -1 88.5466 4.52691 2
 -6 2 1 99.5143 5.35369 5
 6 2 -1 102.747 4.56335 3
 -4 -2 1 71.7534 3.86261 3
 4 -2 -1 64.1265 3.45289 4
 -4 -2 1 65.8999 3.26576 5
 4 -2 -1 73.0495 3.09715 2
 4 -2 -1 72.7041 4.58876 6
 4 2 -1 56.6642 4.3631 1
 -4 2 1 70.8393 3.43584 4
 -4 2 1 56.932 4.46318 6
 4 2 -1 76.4056 3.84478 3
 -4 2 1 69.4304 3.09049 2
 -4 2 1 61.15 4.42034 5
 -2 -2 1 13.4034 2.23938 2
 -2 -2 1 21.9099 2.76036 5
 -2 -2 1 23.8865 3.15039 1
 2 2 -1 27.9666 3.50545 1
 2 2 -1 17.3334 3.64118 6
 -2 2 1 19.2958 3.45472 5
 2 2 -1 18.2333 2.16018 2
 0 -2 -1 35.5864 3.93864 1
 0 -2 1 39.1457 3.99384 1
 0 -2 1 43.0357 2.18431 2
 0 -2 -1 48.6465 2.70782 2
 0 2 -1 38.1956 2.11745 2
 0 2 1 47.9417 3.67064 1
 0 2 1 48.1577 2.81458 2
 2 -2 1 1431.29 52.4353 5
 2 -2 1 1445.75 54.7452 6
 -2 -2 -1 1509.01 49.2339 3
 -2 -2 -1 1376.21 47.6704 2
 2 -2 1 1440.03 48.0343 4
 -2 2 -1 1429.46 54.7262 6
 2 2 1 1434.39 52.0657 5
 2 2 1 1436.07 52.5443 1
 -2 2 -1 1484.17 52.4729 5
 2 2 1 1314.18 47.6458 2
 4 -2 1 14.0752 2.63446 5
 4 -2 1 14.422 1.69597 2
 -4 -2 -1 13.4622 1.9713 3
 4 -2 1 19.0078 2.97281 6
 -4 2 -1 14.1772 1.3935 2
 -4 2 -1 9.9279 1.79622 4
 -4 2 -1 16.7556 2.76486 5
 -6 -2 -1 98.2898 4.45318 3
 -6 -2 -1 97.7725 4.80701 2
 6 -2 1 99.5506 4.09673 2
 6 -2 1 100.721 5.62127 5
 -6 2 -1 96.3164 5.73908 5
 6 2 1 95.7202 4.86982 2
 -6 2 -1 99.1791 4.16366 2
 -6 2 -1 94.8112 4.77178 4
 6 2 1 107.74 4.53012 3
 8 -2 1 5.46908 1.63063 2
 -8 -2 -1 1.09293 2.25392 2
 8 -2 1 5.09176 1.61398 2
 8 2 1 5.28327 1.84558 3
 8 2 1 0.22787 2.23318 2
 -8 2 -1 2.91684 2.96135 5
 -8 2 -1 4.05958 2.22573 4
 -10 -2 -1 26.2567 3.14375 2
 10 -2 1 36.9316 3.06264 2
 10 -2 1 32.8455 3.13468 2
 10 2 1 33.055 3.10014 3
 -10 2 -1 25.3205 4.9995 5
 10 2 1 32.5779 3.26437 2
 12 -2 1 113.958 5.32175 2
 -12 -2 -1 109.87 6.14743 2
 12 -2 1 112.668 5.34805 2
 12 2 1 113.156 6.2015 2
 12 2 1 116.658 5.27046 3
 -12 2 -1 101.947 7.04031 5
 14 -2 1 -2.7373 2.19265 2
 -14 -2 -1 -1.2427 2.84068 2
 14 -2 1 -1.8006 2.22432 2
 14 2 1 -1.9948 2.12274 3
 -14 2 -1 -5.4898 3.69674 5
 14 2 1 -3.0912 2.56574 2
 14 2 1 -1.5591 2.6071 2
 -16 -2 -1 172.251 8.68034 2
 16 -2 1 157.016 7.73386 2
 16 -2 1 151.62 7.60964 2
 16 2 1 163.924 8.35626 2
 16 2 1 176.555 8.5679 2
 16 2 1 160.35 7.3202 3
 -16 2 -1 173.643 9.63706 5
 18 -2 1 284.404 12.2629 2
 18 -2 1 278.487 12.4111 2
 18 2 1 297.013 11.9566 3
 18 2 1 329.493 13.052 2
 18 2 1 333.254 13.1395 2
 20 -2 1 1.10735 3.49098 2
 20 -2 1 1.41501 3.5446 2
 20 2 1 6.74533 3.21224 3
 20 2 1 4.92397 3.80246 2
 20 2 1 7.75736 3.6051 2
 22 -2 1 60.646 6.84272 2
 22 -2 1 62.8011 6.85855 2
 22 2 1 62.8544 5.91158 3
 22 2 1 54.0694 7.667 2
 24 -2 1 -2.2134 4.14766 2
 24 -2 1 2.60028 4.3964 2
 24 2 1 -5.9378 4.24183 2
 26 -2 1 5.93834 5.50898 2
 26 -2 1 -5.0231 4.65001 2
 26 2 1 -8.7471 4.21382 2
 27 -3 -1 23.9532 6.73846 2
 25 -3 -1 38.4555 8.3287 6
 25 -3 -1 16.4312 5.628 2
 25 -3 -1 18.5432 5.06265 2
 25 3 -1 24.7982 5.27272 2
 23 -3 -1 19.8381 4.85639 2
 23 -3 -1 15.9306 4.5203 2
 23 3 -1 23.9921 4.74232 3
 23 3 -1 21.7428 5.0142 2
 -23 3 1 31.9597 7.12342 5
 21 -3 -1 26.1895 4.25949 2
 21 -3 -1 27.8107 4.84531 2
 21 3 -1 29.2679 4.61606 2
 21 3 -1 34.6164 4.94067 2
 21 3 -1 33.034 5.58247 3
 -21 3 1 43.1743 8.02363 5
 19 -3 -1 213.081 11.9027 6
 19 -3 -1 193.805 9.46447 2
 19 -3 -1 173.701 9.71573 2
 19 3 -1 221.327 10.431 2
 -19 3 1 224.093 11.7189 5
 19 3 -1 185.696 9.42575 3
 19 3 -1 208.983 10.2042 2
 17 -3 -1 198.952 10.8238 6
 17 -3 -1 174.514 8.672 2
 17 -3 -1 191.527 8.55769 2
 17 3 -1 188.054 9.46364 2
 17 3 -1 201.452 9.73044 2
 -17 3 1 190.631 10.7758 5
 17 3 -1 182.848 8.61819 3
 -15 -3 1 1.10513 3.24216 2
 15 -3 -1 4.86453 2.5131 2
 15 -3 -1 1.74723 4.07594 6
 15 -3 -1 0.30978 2.62854 2
 -15 3 1 1.22862 2.88768 2
 15 3 -1 3.58905 2.75472 3
 15 3 -1 0.27424 3.03917 2
 15 3 -1 2.65479 2.95719 2
 -15 3 1 -2.9712 3.94711 5
 13 -3 -1 19.9248 4.18809 6
 -13 -3 1 17.4454 3.38648 2
 13 -3 -1 20.2325 3.65706 2
 13 3 -1 29.5689 4.65141 2
 13 3 -1 23.6399 4.26448 2
 13 3 -1 16.0644 2.94264 3
 -13 3 1 17.2048 2.9298 2
 -13 3 1 14.8191 3.30642 4
 11 -3 -1 86.3074 4.60835 2
 -11 -3 1 77.7368 5.46732 2
 11 -3 -1 89.3008 6.20697 6
 11 3 -1 87.5789 5.00379 3
 -11 3 1 86.4606 5.38859 4
 11 3 -1 85.9974 5.54731 2
 -11 3 1 84.7389 4.81265 2
 -9 -3 1 24.423 3.00027 2
 9 -3 -1 29.6983 4.61304 6
 9 -3 -1 28.4261 2.91382 2
 -9 3 1 26.8185 4.0289 5
 9 3 -1 27.2325 3.69166 3
 -9 3 1 18.7946 3.06243 2
 -9 3 1 35.7688 3.7173 4
 9 3 -1 27.9427 3.07202 2
 7 -3 -1 22.6071 2.39196 2
 -7 -3 1 21.1243 2.66825 2
 -7 -3 1 21.184 3.3937 3
 -7 3 1 25.6295 3.26822 4
 7 3 -1 17.2652 2.56897 2
 7 3 -1 24.3397 3.65692 3
 7 3 -1 24.5542 4.25613 1
 -7 3 1 21.2172 2.74735 2
 -7 3 1 24.7712 3.67897 5
 -5 -3 1 42.242 3.22799 5
 -5 -3 1 42.275 3.61827 2
 5 -3 -1 47.2717 4.88605 6
 5 -3 -1 51.8097 3.68508 4
 5 -3 -1 52.6184 2.80092 2
 -5 -3 1 53.3504 3.95783 3
 -5 3 1 34.6475 4.76887 6
 5 3 -1 55.986 4.44831 1
 5 3 -1 40.6813 3.39612 2
 -5 3 1 55.4957 2.98396 2
 -5 3 1 38.6573 4.83399 5
 3 -3 -1 14.7546 2.01618 4
 -3 -3 1 12.5907 2.51417 3
 3 -3 -1 16.7949 2.11684 2
 -3 -3 1 11.8412 1.82063 2
 3 -3 -1 15.8388 3.10909 1
 -3 -3 1 14.5899 2.37472 5
 -3 3 1 11.1082 2.91809 5
 3 3 -1 15.5166 3.381 6
 -3 3 1 18.1655 3.78266 6
 -3 3 1 18.2404 2.28646 2
 3 3 -1 14.0419 2.2955 2
 3 3 -1 19.4579 3.28628 1
 -1 -3 1 155.924 6.85141 3
 -1 -3 1 155.878 7.49906 1
 -1 -3 1 149.234 5.68368 2
 1 -3 -1 147.418 5.83889 2
 1 -3 -1 155.999 7.48249 1
 -1 -3 1 139.545 6.8711 5
 -1 3 1 166.24 7.82671 6
 1 3 -1 147.872 6.90733 5
 1 3 -1 157.7 7.64877 6
 -1 3 1 148.777 5.91056 2
 1 3 -1 152.949 5.75994 2
 1 3 -1 154.114 7.25679 1
 -1 3 1 150.948 6.93513 5
 1 -3 1 243.106 10.3639 1
 1 -3 1 222.959 8.3042 2
 1 -3 1 214.38 10.0142 5
 -1 -3 -1 257.965 9.54296 3
 -1 -3 -1 246.911 10.2888 1
 -1 -3 -1 237.369 8.78361 2
 1 -3 1 255.25 9.16926 4
 1 -3 1 244.892 10.6643 6
 1 3 1 221.386 9.58851 5
 -1 3 -1 250.868 10.7682 6
 -1 3 -1 238.361 8.36255 2
 -1 3 -1 240.176 10.032 5
 1 3 1 237.204 8.83081 2
 1 3 1 253.68 10.1773 1
 3 -3 1 153.259 7.42636 5
 -3 -3 -1 149.057 6.35795 2
 3 -3 1 163.633 6.75522 4
 3 -3 1 162.204 7.78201 6
 -3 -3 -1 165.025 6.8559 3
 3 3 1 159.194 7.45784 1
 -3 3 -1 151.569 7.64706 5
 3 3 1 146.067 6.45345 5
 -3 3 -1 163.525 7.88377 6
 3 3 1 147.508 6.29342 2
 -5 -3 -1 30.2982 3.35228 3
 -5 -3 -1 24.149 3.41329 2
 5 -3 1 23.6822 4.23146 5
 5 -3 1 24.1639 2.79532 4
 5 -3 1 29.8862 4.47745 6
 5 3 1 22.7368 3.61442 2
 -5 3 -1 23.505 2.2871 2
 -5 3 -1 35.252 3.55652 4
 5 3 1 22.1382 4.06356 1
 -5 3 -1 27.9358 4.49518 5
 -7 -3 -1 64.2213 4.28892 3
 7 -3 1 69.6482 3.42498 2
 -7 -3 -1 61.8888 4.71179 2
 7 -3 1 71.1918 5.48982 6
 -7 3 -1 69.4806 4.50435 4
 7 3 1 59.6289 4.59509 2
 -7 3 -1 64.0279 5.86394 5
 -7 3 -1 70.7012 3.51094 2
 9 -3 1 286.309 12.6435 6
 -9 -3 -1 262.83 10.7949 2
 9 -3 1 276.335 9.88134 2
 9 -3 1 281.221 10.1127 2
 -9 3 -1 278.34 9.98934 2
 9 3 1 272.228 10.8701 2
 9 3 1 283.454 10.7524 3
 -9 3 -1 274.576 10.7908 4
 -9 3 -1 262.709 12.2801 5
 11 -3 1 479.986 20.6147 6
 -11 -3 -1 482.233 17.8605 2
 11 -3 1 492.36 17.0958 2
 11 -3 1 493.943 17.3039 2
 -11 3 -1 479.876 17.9725 4
 11 3 1 507.203 17.9555 2
 -11 3 -1 478.625 19.9016 5
 11 3 1 509.204 17.9243 3
 13 -3 1 18.865 2.89294 2
 13 -3 1 23.6821 2.79916 2
 -13 -3 -1 20.399 3.61158 2
 -13 3 -1 19.203 4.80566 5
 13 3 1 22.2899 3.73258 3
 -13 3 -1 17.6303 3.55135 4
 13 3 1 19.4244 3.56492 2
 15 -3 1 72.9285 5.54112 2
 -15 -3 -1 85.1481 6.70403 2
 15 -3 1 71.9778 5.27629 2
 -15 3 -1 82.5769 6.7483 4
 15 3 1 89.5276 6.76039 2
 -15 3 -1 93.9466 8.29274 5
 15 3 1 64.4814 5.45318 3
 17 -3 1 74.7655 6.07575 2
 17 -3 1 74.9227 6.2274 2
 -17 -3 -1 93.3847 7.68659 2
 17 3 1 84.3559 6.944 2
 17 3 1 59.2842 5.77318 3
 19 -3 1 10.7987 3.51533 2
 19 -3 1 11.5333 4.06012 2
 19 3 1 10.9937 4.01759 2
 19 3 1 12.1037 4.36543 2
 -19 3 -1 13.0932 4.69553 4
 19 3 1 17.8459 3.70397 3
 -19 3 -1 21.2425 6.31602 5
 21 -3 1 -0.1899 3.58531 2
 21 -3 1 -3.3256 4.09878 2
 21 3 1 -5.5952 3.99201 2
 21 3 1 1.04925 3.79776 3
 23 -3 1 22.0812 4.60117 2
 23 -3 1 19.7047 5.47875 2
 25 -3 1 4.47136 6.31319 2
 25 -3 1 -5.1326 4.48168 2
 25 3 1 -7.3567 4.50719 2
 26 -4 -1 34.3252 7.33792 2
 26 4 -1 29.5148 5.78473 2
 24 -4 -1 1.8465 4.80608 2
 24 4 -1 8.34265 4.91843 2
 22 -4 -1 16.2323 5.28776 2
 22 -4 -1 14.8015 4.65993 2
 22 4 -1 19.8602 5.02109 3
 22 4 -1 12.5896 4.70113 2
 20 -4 -1 20.3887 7.04109 6
 20 -4 -1 27.0741 4.25056 2
 -20 4 1 19.125 5.25561 4
 20 4 -1 24.7624 4.65248 2
 20 4 -1 26.4441 4.52056 3
 18 -4 -1 41.4188 8.40599 6
 18 -4 -1 52.9053 5.96494 2
 18 4 -1 52.8606 6.28034 3
 -18 4 1 49.4322 7.0205 4
 18 4 -1 43.3322 7.19623 2
 -18 4 1 65.6145 9.08444 5
 -16 -4 1 3.92582 4.22327 2
 16 -4 -1 1.74244 2.98947 2
 16 -4 -1 7.50271 5.38382 6
 16 4 -1 7.43159 3.88647 2
 -16 4 1 1.43291 5.64881 5
 16 4 -1 3.78674 3.92115 2
 16 4 -1 1.3142 3.49723 3
 -16 4 1 -0.8663 3.83774 4
 -16 4 1 7.77056 3.52355 2
 14 -4 -1 33.416 4.72798 2
 14 -4 -1 44.3373 6.56642 6
 -14 -4 1 33.0355 5.77489 2
 -14 4 1 29.1551 4.60792 2
 14 4 -1 33.9348 5.25594 2
 -14 4 1 32.1602 5.4339 4
 14 4 -1 34.2005 5.08103 3
 14 4 -1 29.3958 4.26112 2
 -14 4 1 36.6729 5.77464 5
 12 -4 -1 95.154 7.36441 6
 -12 -4 1 83.5644 6.36602 2
 12 4 -1 88.8402 6.10994 3
 -12 4 1 82.724 5.19166 2
 -12 4 1 77.9226 7.28824 5
 12 4 -1 85.8829 6.34403 2
 -12 4 1 83.0529 5.93857 4
 10 -4 -1 124.734 7.85433 6
 -10 -4 1 112.238 6.62059 2
 -10 4 1 118.528 7.66891 5
 10 4 -1 131.918 7.49377 1
 -10 4 1 114.381 5.60869 2
 10 4 -1 112.4 6.55679 2
 10 4 -1 127.234 6.54508 3
 -10 4 1 125.193 6.51185 4
 -8 -4 1 161.182 7.36349 2
 8 -4 -1 161.966 8.91697 6
 8 -4 -1 156.768 6.47114 2
 -8 -4 1 165.268 7.68618 3
 -8 4 1 166.31 6.67269 2
 -8 4 1 158.226 8.69 5
 -8 4 1 166.324 7.40114 4
 8 4 -1 175.705 8.5282 1
 8 4 -1 159.267 7.37941 2
 6 -4 -1 309.731 13.8484 6
 -6 -4 1 320.616 12.306 3
 6 -4 -1 314.054 11.8278 4
 -6 -4 1 311.062 11.5212 2
 6 4 -1 300.816 11.5137 2
 6 4 -1 316.686 13.1979 1
 -6 4 1 321.275 11.094 2
 -6 4 1 299.737 13.1053 5
 -6 4 1 287.743 13.9452 6
 -4 -4 1 0.8256 2.83778 3
 -4 -4 1 3.59341 2.1203 2
 4 -4 -1 2.92166 2.43586 4
 4 -4 -1 5.5423 1.8112 2
 -4 4 1 -1.3505 3.11305 5
 -4 4 1 5.02558 1.82113 2
 4 4 -1 3.45909 2.05149 2
 4 4 -1 6.26767 3.31778 1
 -2 -4 1 -2.3786 3.83483 1
 2 -4 -1 3.86332 1.86081 2
 2 -4 -1 3.29281 2.27545 4
 -2 -4 1 4.65865 1.93207 2
 -2 -4 1 1.42855 2.86583 3
 -2 4 1 4.98577 1.76961 2
 2 4 -1 8.2471 3.37305 1
 2 4 -1 -4.0735 3.77748 6
 2 4 -1 5.09928 1.88729 2
 -2 4 1 -6.4645 3.68562 6
 0 -4 -1 -0.573 3.83364 1
 0 -4 -1 9.89313 3.06919 3
 0 -4 -1 10.0719 2.13961 2
 0 -4 1 5.84757 4.00336 1
 0 -4 1 0.77858 3.09858 3
 0 4 1 5.8353 3.98909 6
 0 4 -1 5.24817 3.97246 6
 2 -4 1 23.6119 2.33847 2
 2 -4 1 16.4023 4.48302 1
 -2 -4 -1 27.5627 3.39297 2
 -2 -4 -1 19.0317 4.18333 1
 -2 -4 -1 24.4391 3.34919 3
 2 -4 1 24.1683 4.9789 6
 2 -4 1 22.7998 3.86713 4
 -2 4 -1 22.0625 4.38266 6
 -2 4 -1 23.8372 3.675 5
 2 4 1 21.3223 4.35439 6
 -2 4 -1 26.348 2.3541 2
 2 4 1 20.4625 2.7731 5
 2 4 1 28.6859 4.50818 1
 4 -4 1 -1.3489 1.44077 2
 -4 -4 -1 5.5888 2.38975 2
 -4 -4 -1 1.10199 2.72495 3
 4 -4 1 -5.105 3.40997 6
 4 -4 1 5.36571 2.54953 4
 -4 4 -1 -0.3133 1.53763 2
 -4 4 -1 -0.379 3.4462 5
 4 4 1 3.15247 3.28346 1
 -4 4 -1 -6.4804 3.6131 6
 4 4 1 -0.0571 2.30077 2
 -6 -4 -1 5.66197 2.67215 2
 6 -4 1 3.18619 3.67929 6
 -6 -4 -1 -2.7624 2.93016 3
 -6 4 -1 0.13657 3.76551 5
 6 4 1 8.36538 3.77246 1
 6 4 1 7.30217 2.53056 2
 -8 -4 -1 9.63969 3.24823 3
 -8 -4 -1 13.211 3.17921 2
 8 4 1 21.0604 3.43729 2
 8 4 1 22.6702 4.08691 1
 -8 4 -1 20.7833 4.44222 5
 -8 4 -1 16.1198 2.87328 2
 -8 4 -1 14.0162 2.98189 4
 -10 -4 -1 126.203 7.39594 2
 10 -4 1 129.164 8.25659 6
 10 4 1 125.055 7.49087 2
 10 4 1 119.259 7.83748 1
 -10 4 -1 118.288 5.614 2
 -10 4 -1 140.994 8.77109 5
 -10 4 -1 124.073 6.97187 4
 -12 -4 -1 238.557 10.6162 2
 12 -4 1 233.933 12.4122 6
 12 -4 1 247.092 9.28479 2
 -12 4 -1 237.05 12.3885 5
 12 4 1 236.847 10.6629 2
 -12 4 -1 238.341 10.5475 4
 14 -4 1 90.9149 5.69088 2
 14 -4 1 92.8401 8.35529 6
 -14 -4 -1 86.9582 7.02517 2
 -14 4 -1 74.776 7.18934 4
 14 4 1 85.1331 7.10852 2
 -14 4 -1 105.785 9.33632 5
 16 -4 1 89.8524 8.78592 6
 16 -4 1 93.2685 6.34819 2
 16 -4 1 90.6217 6.91501 2
 -16 -4 -1 82.8347 7.74356 2
 -16 4 -1 86.0634 9.91635 5
 -16 4 -1 82.7224 7.65919 4
 16 4 1 74.0358 7.04372 2
 -18 -4 -1 81.4892 7.99103 2
 18 -4 1 83.036 9.33474 6
 18 -4 1 79.6232 6.80589 2
 18 4 1 81.179 7.73139 2
 -18 4 -1 82.9174 8.42677 4
 20 -4 1 31.3334 7.57611 6
 -20 4 -1 28.4587 5.55543 4
 20 4 1 31.1094 5.15653 2
 22 -4 1 55.3074 7.79444 2
 22 -4 1 51.2095 9.46396 6
 22 4 1 42.1717 7.58401 2
 24 -4 1 6.85998 5.11173 2
 24 4 1 3.30214 4.95708 2
 23 -5 -1 -4.9568 4.91561 2
 -23 5 1 -7.399 6.629 4
 21 5 -1 1.01707 5.13084 2
 -21 5 1 1.44645 5.63287 4
 19 -5 -1 19.0877 4.54817 2
 -19 5 1 29.4668 7.77001 5
 -19 5 1 20.2518 5.63291 4
 19 5 -1 23.5863 5.39492 2
 17 -5 -1 4.92771 3.79967 2
 17 -5 -1 5.32 6.72315 6
 17 5 -1 -1.7769 4.85269 2
 -17 5 1 -7.0848 6.9035 5
 -17 5 1 -5.1201 4.80648 4
 15 -5 -1 12.2612 6.01984 6
 -15 -5 1 16.8251 5.05844 2
 15 5 -1 14.4645 4.38121 2
 -15 5 1 16.304 3.70628 2
 -15 5 1 9.76199 6.4873 5
 15 5 -1 18.162 5.44349 1
 -15 5 1 3.83351 4.5237 4
 13 -5 -1 14.9462 5.91369 6
 -13 -5 1 6.80643 4.23447 2
 -13 5 1 6.1863 3.28139 2
 13 5 -1 8.77375 4.68887 1
 -13 5 1 8.52718 5.66611 5
 -13 5 1 4.37347 3.89042 4
 -11 -5 1 17.7348 4.14434 2
 11 -5 -1 19.0657 5.75063 6
 -11 5 1 12.0473 3.16911 2
 -9 -5 1 8.22745 3.6457 2
 -9 -5 1 4.48888 3.93582 3
 9 -5 -1 13.9452 5.38174 6
 -9 5 1 1.98874 2.67048 2
 -7 -5 1 8.1629 3.81813 3
 7 -5 -1 13.9861 5.1425 6
 7 -5 -1 15.3024 4.23109 1
 -7 -5 1 13.7961 3.36315 2
 -7 5 1 14.4561 4.46644 5
 7 5 -1 5.63123 5.15257 6
 -7 5 1 2.15629 5.26677 6
 -7 5 1 8.85053 2.57012 2
 -5 -5 1 44.1849 5.36355 3
 5 -5 -1 37.7849 5.82472 1
 5 -5 -1 43.5561 5.25569 4
 5 -5 -1 41.7976 3.82626 2
 -5 -5 1 49.0489 4.68856 2
 5 5 -1 33.3399 6.35293 6
 5 5 -1 42.4935 5.61977 1
 -5 5 1 44.4761 3.82714 2
 -5 5 1 46.2175 5.94774 5
 -5 5 1 29.0397 5.73736 6
 3 -5 -1 -0.9605 3.93642 1
 -3 -5 1 -0.4044 3.34193 3
 -3 -5 1 6.41103 2.52931 2
 3 -5 -1 -2.3518 2.94412 4
 3 -5 -1 2.95521 2.32271 2
 -3 5 1 2.54913 3.68952 5
 -3 5 1 0.86505 4.545 6
 3 5 -1 -0.6245 4.50628 6
 -3 5 1 2.5079 2.17991 2
 3 5 -1 8.02439 3.80658 1
 1 -5 -1 7.33128 2.47531 2
 1 -5 -1 0.49367 2.82701 4
 1 -5 -1 5.35488 3.49476 3
 -1 -5 1 1.16488 4.37557 1
 -1 -5 1 5.43514 3.45048 3
 1 -5 -1 -2.6361 4.38098 1
 -1 -5 1 5.12912 2.29389 2
 -1 5 1 1.33939 3.33775 5
 1 5 -1 3.54779 4.98718 6
 -1 5 1 10.4136 5.30169 6
 -1 5 1 0.96815 2.27823 2
 1 -5 1 18.2107 3.80032 3
 1 -5 1 15.8434 4.71586 1
 -1 -5 -1 26.5905 5.04632 1
 1 -5 1 13.776 3.34124 4
 1 -5 1 22.1318 3.155 2
 -1 -5 -1 16.6306 3.82308 3
 -1 5 -1 21.3588 4.98396 6
 1 5 1 27.5431 5.59737 6
 1 5 1 17.4804 3.41179 5
 -1 5 -1 25.6733 4.2713 5
 -1 5 -1 16.9848 2.21108 2
 3 -5 1 7.95209 3.30058 4
 3 -5 1 9.37252 3.78019 3
 -3 -5 -1 14.7334 2.97414 2
 3 -5 1 5.08829 4.39979 1
 3 -5 1 6.67558 1.96201 2
 -3 -5 -1 8.7665 3.53705 3
 3 5 1 9.92591 3.90374 1
 3 5 1 11.7943 5.17745 6
 -3 5 -1 16.7713 4.2476 5
 -3 5 -1 6.1955 2.00146 2
 -5 -5 -1 39.6613 5.09324 2
 5 -5 1 28.4443 5.71093 1
 5 -5 1 40.2254 6.80017 6
 -5 5 -1 40.7991 6.30283 5
 -7 -5 -1 42.9881 5.53014 2
 7 -5 1 40.9094 7.05597 6
 -9 -5 -1 4.92504 3.97896 2
 9 -5 1 11.66 5.6608 6
 -9 -5 -1 2.06464 3.84933 3
 -9 5 -1 16.3659 5.50356 5
 9 5 1 5.24219 4.62505 1
 11 -5 1 33.5994 6.76726 6
 11 -5 1 37.0531 4.17209 2
 -11 -5 -1 32.5183 4.85267 2
 -11 5 -1 43.15 8.16934 5
 11 5 1 44.2293 6.16894 1
 -11 5 -1 25.993 4.43399 4
 -13 -5 -1 -4.2532 4.32207 2
 13 -5 1 2.21018 2.9777 2
 13 -5 1 6.90422 6.50644 6
 -13 5 -1 0.61448 6.40316 5
 13 5 1 -6.7344 4.96166 1
 -13 5 -1 -7.5126 4.05036 4
 -15 -5 -1 6.29108 4.71946 2
 15 -5 1 12.9289 7.21406 6
 15 -5 1 3.4127 3.44518 2
 -15 5 -1 4.4373 4.68168 4
 15 5 1 1.74221 5.30989 1
 -15 5 -1 -10.601 7.37634 5
 17 -5 1 0.04485 3.65831 2
 -17 -5 -1 6.92453 4.86937 2
 17 -5 1 2.68777 6.60318 6
 17 5 1 0.46017 4.47388 2
 -17 5 -1 7.14047 4.86816 4
 19 -5 1 1.30842 4.18944 2
 19 -5 1 2.48159 6.93885 6
 -19 -5 -1 4.18124 5.6001 2
 -19 5 -1 10.3444 5.69309 4
 19 5 1 -2.1187 4.64352 2
 21 -5 1 -0.6945 8.0772 6
 21 5 1 0.23847 5.25363 2
 -21 5 -1 0.83971 6.20371 4
 20 -6 -1 10.4702 8.32975 6
 20 6 -1 2.09702 6.27551 1
 -20 6 1 -2.0568 6.92751 4
 20 6 -1 1.58124 6.13769 2
 18 -6 -1 15.465 7.53329 6
 -18 6 1 22.213 6.58616 4
 18 6 -1 20.8678 6.29776 2
 16 -6 -1 1.56856 7.60947 6
 -16 6 1 3.25397 5.61004 4
 16 6 -1 -2.6367 5.42436 2
 16 6 -1 7.88807 5.68567 1
 -14 -6 1 11.6884 5.75416 2
 14 -6 -1 4.94126 7.48779 6
 14 6 -1 11.87 5.50391 1
 14 6 -1 10.9213 4.9727 2
 -14 6 1 10.8349 3.79954 2
 -14 6 1 14.1296 6.9234 5
 -12 -6 1 47.2411 7.70781 2
 12 -6 -1 56.9063 9.10199 6
 12 6 -1 37.1705 6.22066 1
 -12 6 1 37.5837 5.54637 2
 -12 6 1 49.5841 9.3459 5
 -10 -6 1 131.884 9.03309 3
 10 -6 -1 151.446 9.93274 1
 10 -6 -1 165.426 11.1612 6
 -10 -6 1 175.046 9.87642 2
 10 6 -1 151.116 11.8843 6
 10 6 -1 135.033 9.66873 1
 -10 6 1 163.135 10.9708 5
 -8 -6 1 335.108 13.1977 2
 8 -6 -1 290.484 14.1767 1
 -8 -6 1 286.085 13.556 3
 8 6 -1 304.989 14.4223 1
 8 6 -1 290.01 15.7576 6
 -8 6 1 335.218 15.2303 5
 -6 -6 1 336.411 12.5734 2
 -6 -6 1 285.657 13.4485 3
 6 -6 -1 290.627 14.276 1
 6 -6 -1 308.687 13.2587 4
 -6 6 1 322.51 11.9463 2
 6 6 -1 278.042 15.5144 6
 6 6 -1 276.496 13.9525 1
 -6 6 1 320.142 15.762 6
 -6 6 1 328.025 14.4833 5
 4 -6 -1 14.1435 5.2785 1
 -4 -6 1 17.2183 4.83231 3
 4 -6 -1 0.54092 4.1418 4
 4 -6 -1 7.96289 3.19208 2
 4 -6 -1 10.808 4.67094 3
 4 6 -1 8.85602 6.51548 6
 -4 6 1 10.2919 6.19493 6
 -2 -6 1 5.06841 4.99015 1
 2 -6 -1 -5.3761 4.61365 1
 -2 -6 1 -2.7241 4.05318 3
 -2 -6 1 1.07811 3.24315 2
 2 -6 -1 -3.5289 4.3709 3
 2 6 -1 -4.7931 5.74655 6
 -2 6 1 -4.1218 5.97367 6
 -2 6 1 -0.632 4.83419 5
 0 -6 -1 16.7696 5.57083 1
 0 -6 1 3.46575 5.39128 1
 0 -6 -1 6.25781 4.28244 3
 0 -6 1 9.72284 3.9507 4
 0 -6 1 3.93717 4.29569 3
 0 6 1 4.57043 4.55232 5
 0 6 -1 4.92314 2.74245 2
 0 6 1 17.1202 6.75379 6
 0 6 -1 20.4518 6.65177 6
 2 -6 1 -4.3733 4.07198 3
 -2 -6 -1 -4.7939 4.04579 3
 2 -6 1 -6.7109 4.09453 4
 -2 -6 -1 5.68117 3.7167 2
 -2 6 -1 0.3505 5.61672 6
 2 6 1 -0.4804 5.92909 6
 4 -6 1 11.4108 4.72171 3
 -4 -6 -1 19.3191 4.20238 2
 4 -6 1 8.1204 5.66302 1
 4 -6 1 14.0386 4.52044 4
 -4 6 -1 24.1286 5.85728 5
 4 6 1 19.0841 4.86568 1
 -4 6 -1 27.1588 6.59588 6
 4 6 1 24.9784 6.94784 6
 -6 -6 -1 8.84275 4.90226 3
 6 -6 1 21.086 4.9717 4
 6 -6 1 14.9064 5.44386 1
 -6 -6 -1 25.7178 4.75686 2
 6 -6 1 10.1532 4.86652 3
 6 6 1 7.40315 6.86513 6
 6 6 1 20.1658 5.10961 1
 -6 6 -1 29.6424 6.34664 5
 -8 -6 -1 15.4512 4.87633 2
 -8 -6 -1 6.29084 4.84246 3
 8 -6 1 14.8165 6.78226 6
 8 -6 1 22.2643 5.43784 1
 8 6 1 12.1087 5.42821 1
 -8 6 -1 20.7164 6.77966 5
 -10 -6 -1 47.6513 6.99256 3
 10 -6 1 51.6995 7.54463 1
 -10 -6 -1 57.5192 8.43089 2
 10 -6 1 64.854 9.09117 6
 -10 6 -1 75.8119 9.91927 5
 10 6 1 55.1743 7.464 1
 12 -6 1 42.1091 8.00679 6
 -12 -6 -1 43.4681 6.13691 2
 12 6 1 39.9377 7.48125 1
 -12 6 -1 54.3818 9.80429 5
 -14 -6 -1 57.4386 8.58388 2
 14 -6 1 48.9738 8.36259 6
 14 6 1 44.4558 7.64849 1
 -14 6 -1 53.7817 8.85746 5
 16 -6 1 25.8067 8.40136 6
 -16 -6 -1 55.8473 9.70109 2
 16 6 1 40.1831 7.77759 1
 -16 6 -1 35.6898 6.52253 4
 16 6 1 22.3461 5.70252 2
 -18 -6 -1 39.4348 7.00446 2
 18 6 1 31.75 7.22628 1
 -18 6 -1 30.7792 7.17702 4
 18 6 1 34.6307 6.68777 2
 17 -7 -1 19.1855 8.72536 6
 17 7 -1 6.44413 6.77301 1
 17 7 -1 0.72486 6.81983 2
 15 -7 -1 -5.4221 5.74057 1
 15 7 -1 -9.8401 5.98835 1
 15 7 -1 -6.7552 6.25022 2
 13 -7 -1 3.22069 6.06714 1
 -13 7 1 12.9888 8.03105 5
 13 7 -1 13.3436 6.11568 2
 13 7 -1 1.23781 5.63389 1
 13 7 -1 2.55178 9.44854 6
 -11 -7 1 24.7866 6.87342 2
 11 -7 -1 22.4185 6.2963 1
 11 7 -1 24.4265 5.54222 2
 -9 -7 1 16.4486 5.86785 3
 9 -7 -1 21.7458 6.26772 1
 -9 -7 1 29.3517 6.40282 2
 9 7 -1 13.2489 5.43384 1
 9 7 -1 36.4012 9.05997 6
 -9 7 1 29.9622 7.88941 5
 -7 -7 1 30.2371 5.87036 2
 7 -7 -1 24.8148 6.02387 1
 7 -7 -1 27.568 5.7209 3
 -7 -7 1 22.4009 5.83616 3
 7 7 -1 29.8805 5.5327 1
 7 7 -1 32.8895 8.68084 6
 -5 -7 1 -6.2577 4.87534 3
 5 -7 -1 3.82172 5.32826 4
 5 -7 -1 2.70659 5.06818 3
 5 -7 -1 -4.3824 5.41581 1
 5 7 -1 6.90866 8.02247 6
 -5 7 1 7.16518 6.68513 5
 -5 7 1 7.7573 7.28069 6
 3 -7 -1 9.56646 5.18714 3
 -3 -7 1 1.08797 4.81429 3
 3 -7 -1 5.95151 5.23754 4
 3 -7 -1 -0.9993 5.87698 1
 3 7 -1 4.38293 7.34416 6
 -3 7 1 14.003 6.37746 5
 -3 7 1 5.87827 6.788 6
 -1 -7 1 7.67111 4.82433 3
 1 -7 -1 16.1752 5.89697 1
 -1 -7 1 -1.9272 5.20271 4
 1 -7 -1 9.66465 5.03328 3
 -1 -7 1 10.9352 5.6697 1
 1 7 -1 5.52248 7.15505 6
 -1 7 1 11.7655 6.89262 6
 1 -7 1 0.6824 5.27125 4
 -1 -7 -1 6.37084 4.89121 3
 1 -7 1 7.46748 5.09137 3
 1 -7 1 9.85786 5.93475 1
 -1 -7 -1 2.33956 4.87137 4
 -1 7 -1 13.1696 7.19027 6
 1 7 1 4.486 8.50295 6
 3 -7 1 33.6045 6.02209 1
 -3 -7 -1 22.9894 5.32061 3
 3 -7 1 25.8497 5.61708 3
 3 -7 1 28.264 5.76922 4
 3 7 1 43.2203 8.39365 6
 5 -7 1 24.555 6.40091 4
 -5 -7 -1 16.2223 5.39874 3
 5 7 1 24.2629 8.22025 6
 -7 -7 -1 55.702 8.37411 3
 7 -7 1 58.9947 8.0054 1
 7 7 1 60.3429 7.58627 1
 -9 -7 -1 18.354 6.38112 2
 -9 -7 -1 3.31188 5.91947 3
 9 -7 1 11.2804 5.50555 3
 9 7 1 5.79234 5.44066 1
 11 -7 1 18.5635 8.48949 6
 -11 -7 -1 -1.7149 6.39993 2
 11 -7 1 0.13301 5.74418 3
 11 -7 1 12.3554 5.78464 1
 11 7 1 -3.6912 5.71973 1
 13 -7 1 24.0821 8.46062 6
 -13 -7 -1 -3.2253 7.1675 2
 13 -7 1 -1.6956 6.04321 1
 13 7 1 -1.5672 6.11475 1
 15 -7 1 3.77252 8.67317 6
 15 -7 1 0.25598 6.49946 1
 -15 -7 -1 -5.288 7.78525 2
 15 7 1 7.02705 6.88891 1
 15 7 1 -8.79 6.79263 2
 -10 -8 1 6.28619 6.80386 3
 10 -8 -1 7.75026 6.30818 1
 10 -8 -1 12.5427 6.2195 3
 10 8 -1 15.2759 7.19087 2
 10 8 -1 2.21102 5.7386 1
 8 -8 -1 33.4334 6.25814 3
 8 -8 -1 37.1501 7.36104 1
 -8 -8 1 28.6172 6.67078 3
 8 8 -1 31.343 7.0944 2
 8 8 -1 50.8162 11.4779 6
 6 -8 -1 3.85352 6.29962 1
 -6 -8 1 15.1117 6.15394 3
 6 -8 -1 6.33348 5.71809 3
 6 8 -1 13.4405 10.2583 6
 -4 -8 1 2.1628 6.73059 4
 4 -8 -1 11.0611 5.55513 3
 4 -8 -1 1.75221 6.06824 1
 4 -8 -1 11.098 7.39906 4
 -4 -8 1 9.72177 5.65401 3
 -4 8 1 13.9685 8.67561 6
 4 8 -1 25.4284 8.8116 6
 2 -8 -1 11.756 6.45942 1
 2 -8 -1 6.54471 6.80081 4
 2 -8 -1 -0.0612 5.41171 3
 -2 -8 1 -4.1872 6.78028 4
 -2 -8 1 -2.7945 5.24507 3
 -2 8 1 -0.9327 7.71354 6
 2 8 -1 6.07181 8.31808 6
 0 -8 1 11.4468 6.29425 1
 0 -8 1 -6.153 6.81899 4
 0 -8 1 -5.0161 5.42889 3
 0 -8 -1 -1.7405 6.85095 4
 0 -8 -1 0.26013 5.2171 3
 0 8 -1 15.0052 7.76871 6
 0 8 1 -2.8222 7.64561 6
 -2 -8 -1 -2.6291 6.32821 4
 -2 -8 -1 -4.3181 5.35772 3
 2 -8 1 -0.9251 7.02527 4
 2 -8 1 13.1455 6.17106 1
 2 -8 1 -0.5111 5.32914 3
 -2 8 -1 17.5903 8.0335 6
 2 8 1 4.94779 9.12024 6
 4 -8 1 -10.893 5.55824 3
 4 -8 1 0.94477 7.01947 4
 4 -8 1 -2.557 5.37896 1
 -4 -8 -1 12.1459 5.96664 3
 4 8 1 12.2446 9.63194 6
 6 -8 1 4.03848 5.51547 3
 6 -8 1 -0.1546 6.07241 1
 -6 -8 -1 0.68509 6.47579 3
 -8 -8 -1 -2.3882 6.82623 3
 8 -8 1 13.7508 5.70755 3
 8 -8 1 0.13282 6.74044 1
 8 8 1 32.9589 10.4924 6
 -10 -8 -1 5.9698 7.47045 3
 10 -8 1 19.8624 6.61819 3
 10 -8 1 10.586 6.86809 1
 10 8 1 13.8263 6.9072 1
 30 0 -2 58.3319 8.33239 2
 28 0 -2 5.24679 4.51472 2
 26 0 -2 -0.382 3.46441 2
 -26 0 2 7.05507 6.10379 5
 26 0 -2 4.43203 3.90031 2
 24 0 -2 57.8559 6.68196 2
 -24 0 2 47.666 7.10466 5
 24 0 -2 47.1223 6.62709 2
 22 0 -2 42.108 4.84851 2
 22 0 -2 41.1641 4.49211 2
 -22 0 2 46.5649 6.4623 5
 20 0 -2 14.3232 3.45453 2
 -20 0 2 19.2867 4.20442 5
 20 0 -2 14.903 3.60997 2
 18 0 -2 199.44 8.90995 2
 18 0 -2 199.61 8.87554 2
 -18 0 2 210.668 9.54618 5
 -16 0 2 176.81 8.20328 5
 16 0 -2 178.337 7.72692 2
 16 0 -2 171.238 7.68094 2
 -14 0 2 225.739 9.77225 5
 14 0 -2 232.274 9.1341 2
 14 0 -2 235.605 9.13832 2
 -12 0 2 17.2592 2.58241 2
 12 0 -2 23.9898 3.18557 2
 12 0 -2 27.4073 3.27885 2
 -10 0 2 657.678 22.2762 2
 10 0 -2 663.25 22.2729 2
 10 0 -2 632.287 22.1945 2
 8 0 -2 82.7508 3.97036 2
 -8 0 2 80.6001 4.07739 2
 -6 0 2 602.649 20.1458 2
 6 0 -2 588.243 20.1165 2
 4 0 -2 767.839 25.6257 2
 -4 0 2 766.228 25.6022 2
 2 0 2 4.86283 1.1534 2
 -2 0 -2 4.42028 1.16225 2
 4 0 2 506.08 18.881 5
 -4 0 -2 502.657 17.3099 2
 4 0 2 514.537 17.3322 2
 6 0 2 148.082 5.92706 2
 -6 0 -2 142.879 6.22381 5
 6 0 2 146.874 6.17716 5
 -6 0 -2 142.675 5.90651 2
 -8 0 -2 117.812 5.48825 5
 -8 0 -2 105.037 5.18843 2
 8 0 2 109.756 5.1157 2
 8 0 2 103.288 5.36528 5
 -10 0 -2 81.1682 4.83349 5
 10 0 2 76.0569 4.60799 2
 10 0 2 77.2748 4.52931 2
 -10 0 -2 72.3482 4.7253 2
 -12 0 -2 334.467 12.6687 2
 -12 0 -2 337.234 13.5154 5
 12 0 2 330.65 12.5056 2
 12 0 2 342.547 12.5151 2
 -14 0 -2 414.886 16.3401 5
 14 0 2 400.287 15.017 2
 14 0 2 408.277 15.0798 2
 16 0 2 345.64 13.56 2
 16 0 2 360.227 13.747 2
 18 0 2 7.00747 4.05485 2
 18 0 2 15.9283 3.79476 2
 20 0 2 137.947 8.07445 2
 20 0 2 130.941 8.55498 2
 22 0 2 -4.1919 3.29527 2
 22 0 2 -0.6397 3.25333 2
 24 0 2 8.03075 4.07228 2
 26 0 2 18.121 4.76988 2
 29 -1 -2 9.67254 5.27275 2
 -29 1 2 15.1769 9.16039 5
 29 1 -2 20.7602 4.95804 2
 27 -1 -2 20.1398 4.78451 2
 27 1 -2 12.2847 4.95486 2
 -27 1 2 22.2045 7.44074 5
 25 -1 -2 4.78363 3.96372 2
 25 -1 -2 6.9251 3.82808 2
 25 1 -2 5.86491 3.71839 2
 25 1 -2 13.3003 3.8716 2
 -25 1 2 2.13923 5.68847 5
 -23 -1 2 10.4827 4.37114 5
 23 -1 -2 3.87053 3.62273 2
 23 -1 -2 8.3089 3.61116 2
 23 1 -2 10.0006 3.66785 2
 -23 1 2 15.6919 5.42345 5
 23 1 -2 9.65478 3.5107 2
 -21 -1 2 3.70339 3.83789 5
 21 -1 -2 -5.3158 3.06037 2
 21 -1 -2 -5.2433 3.16833 2
 -21 1 2 4.28855 4.39398 5
 21 1 -2 -3.4759 3.23122 2
 19 -1 -2 4.25736 3.04133 2
 19 -1 -2 11.2761 3.08782 2
 19 1 -2 7.23346 3.11345 2
 -19 1 2 3.75964 4.09277 5
 19 1 -2 3.7807 3.13146 2
 17 -1 -2 -0.125 2.3467 2
 17 -1 -2 2.63937 2.47002 2
 -17 -1 2 -2.1013 2.82883 5
 -17 1 2 -2.2546 3.5557 5
 17 1 -2 -0.8438 2.47322 2
 17 1 -2 -2.0747 2.50487 2
 -15 -1 2 14.0127 2.78151 5
 15 -1 -2 11.3141 2.42513 2
 15 -1 -2 11.0336 2.46232 2
 -15 1 2 7.91661 2.78356 2
 15 1 -2 12.0182 2.6921 2
 15 1 -2 13.839 2.66283 2
 -15 1 2 10.9742 3.57571 5
 13 -1 -2 280.605 10.4206 2
 13 1 -2 285.309 10.6392 2
 -13 1 2 288.227 11.7145 5
 -13 1 2 268.279 10.5888 2
 13 1 -2 270.809 10.7841 2
 11 -1 -2 189.954 7.27485 2
 11 1 -2 184.627 7.42084 2
 11 1 -2 184.672 7.60608 2
 -11 1 2 187.947 7.46152 2
 9 -1 -2 175.241 6.70379 2
 9 1 -2 174.501 6.79674 2
 -9 1 2 175.952 6.78262 2
 9 1 -2 172.747 6.91207 2
 7 -1 -2 1.45878 1.39959 2
 7 1 -2 1.10509 1.55911 2
 -7 1 2 0.68747 1.56882 2
 7 1 -2 0.13811 1.63081 2
 5 -1 -2 478.424 18.5969 6
 5 -1 -2 481.283 16.2319 2
 -5 1 2 476.103 18.6015 6
 5 1 -2 475.008 16.2399 2
 5 1 -2 469.768 16.2199 2
 -5 1 2 482.446 16.2495 2
 3 -1 -2 346.643 12.1653 2
 -3 -1 2 362.096 12.6328 3
 -3 -1 2 361.366 12.0908 2
 -3 1 2 357.995 14.0245 6
 -3 1 2 360.245 12.2089 2
 3 1 -2 356.213 12.0896 2
 -3 1 2 344.751 12.0627 4
 3 1 -2 371.417 13.8933 6
 3 1 -2 361.35 12.6262 3
 3 1 -2 359.548 12.1051 2
 1 -1 -2 13.2678 1.7637 2
 -1 -1 2 14.8081 2.00303 3
 1 -1 -2 12.2903 2.03678 1
 -1 -1 2 11.7005 2.03222 6
 -1 -1 2 14.6038 2.17723 1
 -1 1 2 14.5634 1.75779 2
 1 1 -2 12.6678 1.93658 3
 1 1 -2 10.9361 2.20282 1
 1 -1 2 106.506 4.82881 5
 1 -1 2 110.162 4.45072 4
 -1 -1 -2 101.266 4.35979 2
 1 1 2 101.381 4.32023 2
 -1 1 -2 109.983 4.41455 4
 -1 1 -2 111.052 3.78651 2
 -3 -1 -2 4.32937 1.74183 2
 3 -1 2 7.68281 1.30495 2
 3 -1 2 8.73275 1.33439 2
 -3 -1 -2 6.98628 1.3055 3
 3 -1 2 5.35512 2.27414 5
 3 1 2 6.90561 1.84088 2
 -3 1 -2 7.40467 2.28868 5
 -3 1 -2 5.98898 1.32352 2
 -3 1 -2 5.56245 1.75293 4
 -5 -1 -2 -1.3132 1.66464 2
 5 -1 2 2.80039 1.37817 2
 5 -1 2 0.8072 1.31325 2
 5 -1 2 0.21256 2.01633 5
 5 1 2 0.4521 1.14329 5
 -5 1 -2 3.04348 2.20743 5
 5 1 2 1.04414 1.13228 3
 5 1 2 -1.2478 1.79733 2
 7 -1 2 47.6083 3.10135 2
 7 -1 2 47.4279 3.96521 5
 7 -1 2 50.6905 3.12975 2
 -7 -1 -2 48.5917 3.69388 2
 7 1 2 46.6701 2.80986 5
 7 1 2 46.0614 3.57396 2
 -7 1 -2 48.718 4.12294 5
 7 1 2 51.2909 2.52882 3
 9 -1 2 11.2205 2.0874 2
 9 -1 2 12.4866 2.75688 5
 9 -1 2 13.3382 2.05859 2
 9 1 2 6.77093 2.46706 2
 -9 1 -2 5.33091 2.92453 5
 -11 -1 -2 7.03585 2.66472 2
 11 -1 2 10.9675 2.23957 2
 11 -1 2 12.3217 2.27839 2
 -11 1 -2 8.08213 3.34686 5
 11 1 2 10.6001 2.61531 2
 -13 -1 -2 3.61051 2.70279 2
 13 -1 2 3.15925 2.23008 2
 13 -1 2 2.77595 2.23741 2
 13 1 2 4.43855 2.5899 2
 -13 1 -2 6.03974 3.48946 5
 13 1 2 6.23404 2.56737 2
 15 -1 2 1.20964 2.5882 2
 15 -1 2 4.55937 2.45306 2
 -15 -1 -2 0.13967 3.02264 2
 15 1 2 4.74586 2.87922 2
 15 1 2 4.72802 2.78875 2
 -15 1 -2 4.05597 4.04881 5
 17 -1 2 53.4479 5.80892 2
 17 1 2 78.4353 6.34953 2
 17 1 2 68.9466 6.14501 2
 19 -1 2 -2.4103 3.17485 2
 19 1 2 0.84295 3.50762 2
 19 1 2 -1.7136 3.13951 2
 21 -1 2 -1.0398 3.25526 2
 21 -1 2 2.79937 3.40016 2
 21 1 2 0.27907 3.75283 2
 21 1 2 -0.9806 3.26127 2
 23 -1 2 -2.3669 3.78522 2
 23 -1 2 7.64507 3.82066 2
 23 1 2 8.09008 4.00923 2
 25 -1 2 3.64822 4.50139 2
 25 -1 2 -5.5139 4.00845 2
 25 1 2 1.11684 3.83297 2
 27 -1 2 9.3685 5.51755 2
 27 1 2 14.5586 4.82484 2
 28 -2 -2 14.0866 5.56032 2
 28 -2 -2 4.35197 4.76511 2
 -28 2 2 15.266 8.21463 5
 28 2 -2 13.2727 4.4021 2
 26 -2 -2 3.6415 4.61347 2
 26 -2 -2 -4.6396 4.0339 2
 26 2 -2 9.99564 4.08904 2
 -26 2 2 -2.9995 6.95569 5
 24 -2 -2 12.8772 4.08709 2
 24 -2 -2 16.9709 4.38951 2
 -24 2 2 21.3225 6.23098 5
 22 -2 -2 87.3989 7.25839 2
 22 -2 -2 94.9298 7.29058 2
 22 2 -2 100.594 7.76629 2
 -22 2 2 112.613 8.96627 5
 22 2 -2 102.067 7.91326 2
 20 -2 -2 -5.5945 3.54766 2
 20 -2 -2 0.13538 3.29692 2
 -20 2 2 -2.9547 5.05543 5
 20 2 -2 3.38662 3.53402 2
 20 2 -2 -7.1228 3.47295 2
 18 -2 -2 76.0733 5.63086 2
 18 -2 -2 61.2742 5.52175 2
 -18 -2 2 81.8279 4.7522 5
 18 2 -2 81.0959 6.08289 2
 -18 2 2 72.4803 6.85036 5
 18 2 -2 68.4034 6.01707 2
 16 -2 -2 266.296 10.154 2
 -16 -2 2 259.075 10.0623 5
 16 -2 -2 249.938 10.0735 2
 -16 2 2 249.01 11.632 5
 16 2 -2 246.164 10.4368 2
 -16 2 2 251.218 10.1954 2
 16 2 -2 252.151 10.4942 2
 14 -2 -2 358.159 12.9551 2
 -14 2 2 358.66 14.6382 5
 14 2 -2 350.45 13.2656 2
 14 2 -2 342.348 13.2516 2
 -14 2 2 350.657 13.0486 2
 12 -2 -2 209.764 8.21118 2
 12 -2 -2 208.026 9.69657 6
 -12 2 2 212.084 8.36842 2
 12 2 -2 217.506 8.38381 3
 12 2 -2 205.4 8.50617 2
 12 2 -2 192.85 8.58332 2
 -12 2 2 224.114 9.85506 5
 -10 -2 2 223.312 8.90316 2
 10 -2 -2 220.977 8.56846 2
 10 -2 -2 223.61 10.138 6
 10 2 -2 236.039 8.88065 2
 -10 2 2 237.233 8.68705 2
 10 2 -2 219.941 8.87559 2
 10 2 -2 240.94 8.94695 3
 -10 2 2 230.307 10.088 5
 8 -2 -2 11.5418 2.63616 6
 -8 -2 2 7.93666 2.0375 2
 8 -2 -2 8.36757 1.61629 2
 -8 2 2 8.78877 1.80544 2
 -8 2 2 9.25016 2.97712 5
 8 2 -2 9.10819 1.98325 2
 8 2 -2 7.71779 1.90306 2
 8 2 -2 9.23976 2.00304 3
 6 -2 -2 385.941 12.9 2
 -6 -2 2 365.376 12.9984 2
 6 -2 -2 366.803 15.0618 6
 -6 2 2 377.953 12.8911 2
 6 2 -2 384.775 13.516 3
 -6 2 2 372.725 15.1035 6
 6 2 -2 363.926 12.987 2
 -6 2 2 356.252 12.9184 4
 -4 -2 2 804.407 27.6013 3
 4 -2 -2 782.699 26.5448 2
 4 -2 -2 760.682 26.6135 4
 4 -2 -2 811.359 30.6542 6
 -4 -2 2 787.576 26.5248 2
 -4 2 2 772.943 26.5426 2
 4 2 -2 758.344 26.5115 2
 -4 2 2 803.86 26.658 4
 -4 2 2 802.936 30.6711 6
 4 2 -2 819.581 27.6159 3
 4 2 -2 791.158 29.4862 1
 2 -2 -2 2198.33 78.2565 1
 -2 -2 2 2119.16 70.8364 2
 -2 -2 2 2059.12 81.2756 6
 -2 -2 2 2197.55 78.2966 1
 -2 -2 2 1975.38 77.8835 5
 2 -2 -2 2050.44 71.0161 2
 -2 -2 2 2254.49 73.3856 3
 -2 2 2 2269.6 81.4567 6
 2 2 -2 2192.86 81.3408 6
 2 2 -2 1962.88 70.8186 2
 2 2 -2 2190.18 73.3425 3
 2 2 -2 2188.95 78.283 1
 -2 2 2 2150.54 71.0554 2
 0 -2 2 849.629 32.9068 5
 0 -2 -2 853.53 29.9187 2
 0 -2 2 935.192 30.2783 4
 0 -2 2 910.044 33.1731 1
 0 -2 -2 902.814 33.0789 1
 0 -2 2 890.581 34.4056 6
 0 -2 2 906.642 31.0286 3
 0 2 2 847.768 29.92 2
 0 2 -2 907.119 34.467 6
 0 2 2 911.465 33.0267 1
 -2 -2 -2 829.245 29.1265 2
 2 -2 2 882.906 29.4146 4
 -2 -2 -2 926.304 30.0485 3
 2 -2 2 867.957 33.5286 6
 2 -2 2 848.872 32.0703 5
 2 2 2 873.201 32.0793 1
 2 2 2 814.729 29.1119 2
 -2 2 -2 864.975 32.0885 5
 -2 2 -2 876.419 29.3935 4
 -4 -2 -2 314.1 11.0135 3
 4 -2 2 307.259 10.3304 2
 4 -2 2 298.215 12.1501 5
 4 -2 2 315.035 10.387 2
 -4 -2 -2 294.573 10.901 2
 4 2 2 287.65 10.9139 2
 -4 2 -2 300.753 10.9846 4
 -4 2 -2 302.275 12.1922 5
 6 -2 2 132.94 6.81459 5
 -6 -2 -2 137.235 6.10831 2
 6 -2 2 137.169 5.39682 2
 6 -2 2 146.13 5.38504 2
 6 2 2 134.569 6.15005 2
 6 2 2 150.567 5.76063 3
 -6 2 -2 145.013 7.14544 5
 -6 2 -2 139.693 6.14622 4
 8 -2 2 153.505 5.85436 2
 8 -2 2 136.242 5.82814 2
 8 -2 2 130.448 7.38403 5
 -8 -2 -2 135.152 6.56225 2
 -8 2 -2 154.406 6.68821 4
 8 2 2 136.102 6.64823 2
 -8 2 -2 147.05 7.46642 5
 8 2 2 160.984 5.9923 3
 10 -2 2 26.6934 3.00911 2
 -10 -2 -2 22.846 3.16117 2
 10 -2 2 18.5318 3.06676 2
 10 2 2 21.8381 2.75811 3
 -10 2 -2 20.5208 4.01806 5
 10 2 2 23.0471 3.14822 2
 12 -2 2 156.272 6.62923 2
 -12 -2 -2 154.66 7.33882 2
 12 -2 2 149.896 6.58105 2
 12 2 2 144.794 7.45983 2
 12 2 2 159.489 6.44431 3
 -12 2 -2 144.655 8.41034 5
 -14 -2 -2 70.6682 5.86451 2
 14 -2 2 69.2084 4.90256 2
 14 -2 2 73.1814 4.94977 2
 14 2 2 81.0737 4.41577 3
 14 2 2 75.9888 6.04525 2
 -14 2 -2 84.0963 6.96543 5
 16 -2 2 135.874 7.52739 2
 16 -2 2 154.35 7.85585 2
 -16 -2 -2 174.867 8.81793 2
 16 2 2 165.303 8.35972 2
 16 2 2 139.949 7.11933 3
 16 2 2 168.836 8.73702 2
 -16 2 -2 185.636 10.2134 5
 18 -2 2 9.54016 3.7313 2
 -18 -2 -2 19.8761 4.51353 2
 18 -2 2 13.6034 3.68506 2
 18 2 2 16.413 3.11338 3
 18 2 2 20.1249 4.28725 2
 20 -2 2 -3.136 3.43247 2
 20 -2 2 -4.3777 3.36891 2
 20 2 2 0.86285 2.95652 3
 -20 2 -2 -0.7978 6.12526 5
 20 2 2 2.36301 3.6121 2
 22 -2 2 -1.055 3.78097 2
 22 -2 2 1.41521 3.84912 2
 22 2 2 2.70045 3.4613 3
 22 2 2 -7.6325 3.8957 2
 22 2 2 -3.4625 4.08005 2
 24 -2 2 -3.7102 4.44086 2
 24 -2 2 1.58301 4.37589 2
 24 2 2 -1.2553 4.56936 2
 26 -2 2 7.50711 5.60932 2
 26 -2 2 2.73828 4.97339 2
 26 2 2 -1.4769 4.79784 2
 27 -3 -2 52.2833 9.03607 2
 27 3 -2 64.4476 8.08037 2
 25 -3 -2 15.0549 4.87827 2
 25 -3 -2 21.2435 5.28617 2
 25 3 -2 23.9867 5.35094 3
 -25 3 2 18.9731 7.58797 5
 25 3 -2 18.6073 4.37264 2
 23 -3 -2 29.7615 4.78593 2
 23 -3 -2 42.1435 7.45015 6
 23 -3 -2 26.8262 5.16742 2
 23 3 -2 37.5726 6.3737 3
 23 3 -2 33.1792 4.80895 2
 21 -3 -2 -3.0321 3.97149 2
 21 -3 -2 1.16632 5.43018 6
 21 -3 -2 -0.9715 3.54718 2
 21 3 -2 -4.6732 3.64993 3
 21 3 -2 -0.5959 3.84666 2
 19 -3 -2 45.1822 7.06928 6
 19 -3 -2 25.3594 4.12613 2
 19 -3 -2 21.4124 4.34424 2
 19 3 -2 40.7439 6.34862 2
 -19 3 2 38.0608 7.36546 5
 19 3 -2 34.882 5.38716 3
 17 -3 -2 1.1277 4.31015 6
 17 -3 -2 -1.9841 2.97429 2
 17 -3 -2 -5.0193 2.84999 2
 17 3 -2 2.88902 3.21249 2
 -17 3 2 -0.9332 4.47947 5
 -17 3 2 3.02633 3.27668 2
 17 3 -2 1.29505 3.20209 2
 17 3 -2 4.73175 3.1546 3
 15 -3 -2 9.01591 3.98304 6
 15 -3 -2 5.037 2.60817 2
 15 3 -2 5.36454 2.83143 3
 15 3 -2 3.71767 3.04981 2
 -15 3 2 2.83813 4.20798 5
 15 3 -2 4.11244 3.08945 2
 -15 3 2 3.69449 2.86558 2
 -13 -3 2 65.7451 5.4021 2
 13 -3 -2 69.3206 4.76001 2
 13 -3 -2 78.9857 5.96137 6
 13 3 -2 72.5547 4.9068 3
 -13 3 2 53.032 6.66181 5
 -13 3 2 78.9332 5.28958 4
 -13 3 2 65.8771 4.79746 2
 13 3 -2 72.368 5.2075 2
 13 3 -2 74.8747 5.46742 2
 11 -3 -2 -1.5237 1.95796 2
 11 -3 -2 2.95602 3.09543 6
 11 3 -2 -1.0678 2.23996 2
 -11 3 2 3.62244 2.44333 4
 -11 3 2 -4.7698 3.66492 5
 11 3 -2 0.58353 2.49034 3
 11 3 -2 -0.6944 2.46554 2
 -9 -3 2 8.75744 2.44211 2
 9 -3 -2 11.1238 1.9818 2
 9 -3 -2 14.6833 3.288 6
 9 3 -2 10.881 2.61553 3
 9 3 -2 9.49829 2.54431 2
 -9 3 2 10.4597 2.18939 4
 -9 3 2 10.306 2.1724 2
 -9 3 2 9.55886 3.67566 5
 -7 -3 2 43.4414 3.86502 3
 7 -3 -2 41.6102 4.7829 6
 -7 -3 2 40.4009 3.02204 5
 7 -3 -2 45.4171 2.90738 2
 -7 -3 2 32.7743 3.61884 2
 -7 3 2 44.3454 4.773 5
 7 3 -2 44.0516 4.60942 1
 -7 3 2 46.9313 3.16936 2
 -7 3 2 33.7821 4.79648 6
 7 3 -2 40.1891 3.62609 2
 7 3 -2 44.8863 3.89065 3
 -7 3 2 47.0232 3.42042 4
 5 -3 -2 589.623 23.0915 6
 5 -3 -2 546.936 19.6248 2
 5 -3 -2 567.333 19.8682 4
 -5 -3 2 597.825 20.7586 3
 -5 -3 2 582.713 19.7143 2
 -5 -3 2 540.486 21.4395 5
 5 3 -2 589.572 22.1846 1
 -5 3 2 578.612 22.0609 5
 5 3 -2 602.891 22.9897 6
 5 3 -2 555.149 19.6964 2
 -5 3 2 572.375 23.1088 6
 5 3 -2 600.343 20.748 3
 -5 3 2 570.475 19.6653 2
 3 -3 -2 204.23 7.7102 4
 -3 -3 2 217.133 8.46204 3
 3 -3 -2 202.696 9.06198 1
 3 -3 -2 195.154 7.5535 2
 -3 -3 2 208.953 7.43418 2
 -3 -3 2 199.292 8.39988 5
 -3 -3 2 204.05 9.07172 1
 -3 3 2 203.995 8.90132 5
 3 3 -2 198.91 9.36534 6
 -3 3 2 201.618 7.56082 2
 3 3 -2 220.471 9.08843 1
 3 3 -2 190.956 7.38311 2
 -3 3 2 200.55 9.57767 6
 -1 -3 2 1.20009 2.39782 5
 -1 -3 2 10.0704 3.01979 6
 -1 -3 2 6.34497 2.42424 3
 1 -3 -2 6.87458 1.72257 2
 -1 -3 2 4.94305 1.23532 2
 -1 -3 2 2.14247 3.30064 1
 1 -3 -2 0.90341 3.26913 1
 -1 3 2 6.75256 1.8192 2
 1 3 -2 5.33844 1.22022 2
 -1 3 2 3.11753 3.38217 6
 1 3 -2 9.06872 2.92391 1
 1 3 -2 5.52498 3.14198 6
 -1 3 2 4.78379 2.42675 5
 1 -3 2 744.879 25.9541 3
 1 -3 2 744.997 27.7946 1
 -1 -3 -2 736.846 27.6658 1
 1 -3 2 753.3 25.2473 4
 -1 -3 -2 709.557 24.8699 2
 1 -3 2 737.404 28.7735 6
 1 -3 2 707.009 27.4306 5
 1 3 2 688.224 24.8992 2
 -1 3 -2 731.64 27.5145 5
 1 3 2 712.087 27.0553 5
 1 3 2 746.846 27.6179 1
 -1 3 -2 761.781 28.8816 6
 3 -3 2 83.4404 4.80543 4
 3 -3 2 88.0255 5.51102 5
 -3 -3 -2 84.0402 4.63334 2
 -3 -3 -2 91.1199 4.69369 3
 3 -3 2 87.8711 5.6894 6
 3 3 2 80.3115 4.57984 2
 3 3 2 85.5904 5.35372 1
 -3 3 -2 81.7138 5.51076 5
 3 3 2 82.0418 4.04919 5
 5 -3 2 122.787 7.10604 5
 5 -3 2 132.893 7.20875 6
 -5 -3 -2 132.359 6.1874 2
 5 -3 2 123.868 4.93773 2
 -5 -3 -2 134.493 6.04629 3
 5 3 2 124.548 6.04176 2
 -5 3 -2 130.838 4.95328 2
 -5 3 -2 134.877 6.10432 4
 -5 3 -2 140.599 7.35201 5
 5 3 2 134.494 6.67793 1
 7 -3 2 56.9447 5.34942 6
 7 -3 2 52.5705 2.95947 2
 -7 -3 -2 42.1923 4.35784 2
 7 -3 2 36.903 5.36131 5
 7 -3 2 52.5694 3.0973 2
 -7 -3 -2 39.28 3.72833 3
 7 3 2 45.7752 4.38895 2
 -7 3 -2 52.5737 5.47912 5
 -7 3 -2 50.154 4.22941 4
 9 -3 2 29.5138 3.00754 2
 9 -3 2 23.0378 4.70784 6
 -9 -3 -2 20.8114 3.21357 2
 9 3 2 21.2038 3.21195 2
 -9 3 -2 18.7268 4.37217 5
 -9 3 -2 23.1689 4.20691 4
 11 -3 2 10.2479 2.33153 2
 -11 -3 -2 8.89616 3.15544 2
 11 -3 2 13.0923 2.24551 2
 -11 3 -2 8.93389 2.8854 4
 11 3 2 11.2057 3.00088 2
 -11 3 -2 8.80847 4.4758 5
 13 -3 2 10.9571 2.58039 2
 13 -3 2 13.7208 2.8622 2
 -13 -3 -2 11.6943 3.5337 2
 -13 3 -2 19.6211 4.81217 5
 13 3 2 13.6893 3.39009 2
 13 3 2 15.8331 2.88525 3
 -13 3 -2 8.31579 3.37108 4
 -15 -3 -2 108.115 7.39052 2
 15 -3 2 108.353 6.08383 2
 15 -3 2 104.712 6.2927 2
 -15 3 -2 105.814 7.66195 4
 15 3 2 84.3937 5.9698 3
 15 3 2 110.087 7.32355 2
 -15 3 -2 98.7184 8.51364 5
 17 -3 2 1.02331 3.23281 2
 -17 -3 -2 14.2362 4.38028 2
 -17 3 -2 11.9004 6.34359 5
 -17 3 -2 8.17313 4.11719 4
 17 3 2 0.35129 3.67391 2
 17 3 2 0.97644 3.08099 3
 -19 -3 -2 33.475 5.52783 2
 19 -3 2 40.2436 5.01557 2
 19 -3 2 34.7441 5.78793 2
 -19 3 -2 39.1746 5.62853 4
 19 3 2 39.1888 5.12336 2
 -19 3 -2 49.8296 7.72114 5
 19 3 2 36.3546 6.41433 2
 19 3 2 38.8601 5.1959 3
 21 -3 2 21.7304 4.26669 2
 21 -3 2 22.8815 4.91086 2
 21 3 2 24.1056 4.96195 2
 21 3 2 25.0364 4.05572 3
 21 3 2 12.1783 4.47415 2
 23 -3 2 18.4333 5.53093 2
 23 -3 2 15.6223 4.87799 2
 23 3 2 16.6857 4.45837 2
 25 -3 2 13.8072 6.47606 2
 25 -3 2 14.0159 5.80037 2
 25 3 2 12.5809 4.25374 2
 25 3 2 8.61717 5.08713 2
 26 -4 -2 3.18486 5.56263 2
 26 -4 -2 11.0536 6.424 2
 26 4 -2 0.82642 4.69722 2
 24 -4 -2 2.04188 5.59756 2
 24 -4 -2 -1.0177 4.6226 2
 24 -4 -2 3.55782 7.7735 6
 24 4 -2 4.88949 5.47678 3
 24 4 -2 -6.2591 4.43409 2
 22 -4 -2 16.5517 4.64539 2
 22 -4 -2 13.9382 5.10698 2
 22 -4 -2 9.44728 7.11523 6
 22 4 -2 3.27285 4.71163 2
 -22 4 2 9.80049 5.5747 4
 22 4 -2 14.1879 4.78827 3
 20 -4 -2 20.7085 7.23585 6
 20 -4 -2 24.9397 4.84922 2
 20 -4 -2 24.4073 4.49245 2
 20 4 -2 39.0049 6.41128 3
 -20 4 2 37.3417 7.06878 5
 20 4 -2 28.5898 5.31891 2
 -20 4 2 23.8283 5.38201 4
 18 -4 -2 6.48853 3.51156 2
 18 -4 -2 11.4937 5.91059 6
 -18 4 2 10.3007 6.00048 5
 18 4 -2 9.1248 4.0382 3
 -18 4 2 4.00838 4.25372 4
 -18 4 2 16.5883 4.10449 2
 16 -4 -2 35.1611 6.00029 6
 -16 4 2 18.7312 5.44333 5
 -16 4 2 23.6476 4.25818 4
 16 4 -2 28.0191 4.46005 2
 -16 4 2 30.429 4.09336 2
 16 4 -2 27.5872 4.18217 3
 14 -4 -2 46.9323 6.49483 6
 14 -4 -2 31.2195 4.54883 2
 -14 -4 2 34.8581 4.37943 2
 14 4 -2 36.2205 5.27186 2
 -14 4 2 34.4073 5.18981 4
 14 4 -2 33.8697 5.83767 2
 14 4 -2 33.7374 5.07771 3
 -14 4 2 30.789 5.54541 5
 -14 4 2 33.2608 4.6815 2
 -12 -4 2 30.1368 3.79217 2
 12 -4 -2 32.6012 5.86841 6
 12 -4 -2 34.9307 3.75202 2
 12 4 -2 37.7211 4.64024 2
 -12 4 2 32.2598 3.3962 2
 -12 4 2 36.9648 4.61502 4
 12 4 -2 40.2797 4.98436 3
 -12 4 2 35.9703 5.20386 5
 12 4 -2 26.5507 3.85518 2
 10 -4 -2 10.1127 4.1337 6
 -10 -4 2 4.67894 2.8797 2
 -10 4 2 0.22479 2.39318 2
 -10 4 2 11.0361 2.76579 4
 10 4 -2 10.5847 3.15566 3
 -10 4 2 1.23424 4.11275 5
 10 4 -2 2.14986 2.98124 2
 10 4 -2 10.1157 3.82495 1
 -8 -4 2 -0.0065 2.45134 2
 -8 -4 2 1.92068 2.94611 3
 8 -4 -2 3.89436 1.81372 2
 8 -4 -2 3.2496 3.93594 6
 8 4 -2 8.14766 3.52652 1
 -8 4 2 -5.2932 3.69163 5
 -8 4 2 2.83334 2.10997 2
 8 4 -2 0.16813 2.52265 2
 -8 4 2 -2.5961 3.66938 6
 -6 -4 2 87.1725 5.5863 3
 -6 -4 2 85.2999 4.90651 5
 6 -4 -2 83.6914 5.17041 4
 -6 -4 2 85.5333 4.77285 2
 -6 4 2 92.812 4.44013 2
 6 4 -2 79.9094 4.73804 2
 6 4 -2 89.1742 6.16487 1
 -6 4 2 78.1504 6.17728 5
 -4 -4 2 186.28 7.20629 2
 4 -4 -2 179.463 7.22378 2
 4 -4 -2 186.758 7.65011 4
 4 -4 -2 181.792 9.08491 1
 -4 -4 2 187.99 8.20606 5
 -4 -4 2 192.312 8.40569 3
 -4 4 2 193.057 7.19553 2
 4 4 -2 171.094 9.43178 6
 4 4 -2 190.781 8.9158 1
 -4 4 2 184.749 8.71084 5
 -4 4 2 170.339 9.78792 6
 2 -4 -2 86.7754 4.47061 2
 -2 -4 2 92.9879 4.06647 2
 -2 -4 2 82.7741 6.21061 1
 -2 -4 2 80.9159 5.4482 3
 -2 -4 2 75.3986 5.53208 5
 2 -4 -2 83.3619 6.37939 1
 2 4 -2 91.0999 5.7346 1
 -2 4 2 80.5289 6.81334 6
 -2 4 2 93.2242 4.49806 2
 0 -4 2 3.49999 3.29786 5
 0 -4 2 1.32327 3.90482 1
 0 -4 2 3.00386 3.12208 3
 0 -4 -2 0.33752 3.81345 1
 0 -4 2 10.7478 2.65996 4
 0 4 2 9.55723 4.01423 6
 0 4 -2 9.58921 4.01224 6
 0 4 2 9.04437 2.19233 2
 0 4 2 3.13492 2.68514 5
 2 -4 2 21.6266 4.42754 6
 2 -4 2 15.3574 2.81954 4
 -2 -4 -2 20.7468 3.5587 2
 -2 -4 -2 17.5247 3.16893 3
 2 -4 2 10.7949 3.49548 5
 2 4 2 20.6254 3.76604 1
 2 4 2 16.2876 2.62652 2
 -2 4 -2 19.2287 3.72997 5
 2 4 2 14.9805 2.59412 5
 -2 4 -2 19.4154 4.38201 6
 4 -4 2 201.817 9.53328 5
 -4 -4 -2 205.513 8.66879 3
 4 -4 2 176.51 9.64587 1
 4 -4 2 214.922 8.70758 4
 -4 -4 -2 211.663 8.37696 2
 4 -4 2 198.657 10.0282 6
 -4 4 -2 198.975 9.60479 5
 4 4 2 174.43 8.03261 5
 4 4 2 205.307 9.45967 1
 4 4 2 198.856 8.35315 2
 -6 -4 -2 186.162 8.1628 2
 6 -4 2 190.783 9.79954 6
 -6 -4 -2 165.277 8.40922 3
 6 4 2 187.081 9.11451 1
 -6 4 -2 197.397 9.57323 5
 6 4 2 188.23 8.15891 2
 -8 -4 -2 121.347 6.7801 2
 8 -4 2 132.172 8.12283 6
 8 -4 2 130.856 5.2047 2
 8 4 2 128.265 6.97172 2
 -8 4 -2 110.916 6.76507 4
 -8 4 -2 140.521 8.46943 5
 8 4 2 122.137 7.42421 1
 -10 -4 -2 42.32 5.75175 2
 10 -4 2 43.0523 3.58087 2
 10 -4 2 46.6703 6.4128 6
 -10 4 -2 40.9122 5.26973 4
 -10 4 -2 60.1516 7.41945 5
 10 4 2 38.7361 5.54102 1
 -12 -4 -2 46.0329 6.43466 2
 12 -4 2 44.7639 4.13457 2
 12 -4 2 50.3288 7.37603 6
 -12 4 -2 61.0304 7.67204 5
 12 4 2 63.1436 6.63171 2
 -12 4 -2 41.331 6.0495 4
 14 -4 2 8.89421 5.69247 6
 14 -4 2 3.81609 3.31679 2
 -14 -4 -2 7.73388 4.20733 2
 14 -4 2 4.37087 2.77042 2
 -14 4 -2 -3.2618 3.89308 4
 -14 4 -2 2.98955 6.05879 5
 14 4 2 5.16056 3.87639 2
 16 -4 2 58.2961 8.19895 6
 16 -4 2 51.463 6.32046 2
 16 -4 2 61.2807 5.37212 2
 -16 -4 -2 56.0529 7.45985 2
 -16 4 -2 56.3965 7.52078 4
 -16 4 -2 53.4689 9.46401 5
 18 -4 2 -1.2482 5.85769 6
 18 -4 2 -8.5443 4.14096 2
 18 -4 2 4.72674 3.669 2
 -18 -4 -2 0.13951 4.33142 2
 -18 4 -2 2.72562 4.37413 4
 18 4 2 5.48901 4.00002 2
 20 -4 2 -3.158 4.70288 2
 20 -4 2 5.35502 4.1053 2
 -20 -4 -2 -2.7125 4.76643 2
 -20 4 -2 -4.1768 4.80077 4
 20 4 2 -2.1395 4.32183 2
 22 -4 2 9.19093 7.11146 6
 22 4 2 6.05599 4.56427 2
 23 5 -2 7.37565 5.71748 2
 -23 5 2 16.4238 6.72107 4
 21 -5 -2 39.9726 8.45208 6
 -21 5 2 27.1018 6.05695 4
 -21 5 2 22.3778 7.89249 5
 21 5 -2 30.5813 6.19224 2
 19 -5 -2 86.8248 10.5951 6
 19 5 -2 77.3357 7.81334 3
 -19 5 2 86.624 8.95751 4
 19 5 -2 84.1074 8.85107 2
 17 -5 -2 83.5549 9.32548 6
 17 5 -2 73.3095 8.01216 2
 -17 5 2 57.4811 7.88806 4
 -17 5 2 85.1787 6.66411 2
 -17 5 2 77.2177 9.64325 5
 15 -5 -2 43.0013 7.95194 6
 15 5 -2 39.0363 5.05002 2
 15 5 -2 43.5118 6.17046 1
 -15 5 2 35.1245 4.92155 4
 -15 5 2 39.3396 5.63086 2
 -15 5 2 34.3029 6.77777 5
 13 -5 -2 3.91649 5.61396 6
 -13 -5 2 3.23845 4.16405 2
 -13 5 2 5.4727 3.70961 4
 13 5 -2 3.66674 3.81965 2
 -13 5 2 -1.9991 5.32332 5
 13 5 -2 4.90513 4.84377 1
 -13 5 2 1.20582 3.22626 2
 -11 -5 2 16.2206 3.9474 2
 11 -5 -2 20.9384 6.02514 6
 11 5 -2 18.2008 4.82146 1
 -11 5 2 20.5922 5.21051 5
 -11 5 2 13.2159 3.39711 2
 9 -5 -2 74.0369 7.60857 6
 -9 -5 2 64.5913 6.16687 3
 -9 -5 2 74.1664 6.01388 2
 -9 5 2 76.8218 7.29631 5
 9 5 -2 85.8654 6.9875 1
 -9 5 2 68.2547 4.93404 2
 9 5 -2 80.3145 7.51445 6
 -7 -5 2 50.4686 5.55181 3
 7 -5 -2 49.7858 5.92392 1
 -7 -5 2 49.1918 4.84066 2
 -7 5 2 41.7397 6.36739 6
 7 5 -2 41.445 6.54093 6
 -7 5 2 45.2659 6.23475 5
 -7 5 2 44.7128 4.45324 2
 7 5 -2 51.3969 6.09157 1
 5 -5 -2 267.561 10.5467 2
 -5 -5 2 298.658 10.7033 2
 5 -5 -2 278.76 12.7 1
 -5 -5 2 270.893 11.7561 3
 5 -5 -2 273.652 11.2355 4
 5 5 -2 273.878 12.5633 1
 -5 5 2 283.792 12.5553 5
 -5 5 2 269.278 13.6319 6
 5 5 -2 269.296 13.3424 6
 -5 5 2 294.075 10.5454 2
 3 -5 -2 145.413 8.66154 1
 3 -5 -2 137.317 6.67377 2
 -3 -5 2 163.055 6.49874 2
 -3 -5 2 154.523 8.5489 1
 3 -5 -2 134.056 7.2011 4
 -3 -5 2 157.836 7.85316 3
 -3 5 2 149.192 6.53122 2
 -3 5 2 147.248 8.07212 5
 -3 5 2 135.577 9.34268 6
 3 5 -2 131.173 9.05115 6
 3 5 -2 146.193 8.21646 1
 1 -5 -2 29.0688 5.80569 1
 -1 -5 2 36.5047 5.13998 3
 -1 -5 2 43.1839 5.56674 1
 -1 -5 2 44.6664 3.46522 2
 1 -5 -2 48.0119 4.57784 2
 1 -5 -2 33.626 5.12153 3
 1 5 -2 42.8565 6.09368 6
 -1 5 2 39.6077 6.46367 6
 -1 5 2 31.831 4.91615 5
 -1 -5 -2 160.723 8.74409 1
 1 -5 2 143.269 7.79727 4
 -1 -5 -2 163.694 7.20355 2
 -1 -5 -2 151.608 7.88993 3
 1 -5 2 144.384 8.02733 3
 1 -5 2 148.695 8.88942 1
 1 5 2 143.582 7.42765 5
 1 5 2 152.618 9.55615 6
 -1 5 -2 160.726 9.34099 6
 3 -5 2 97.9251 7.64636 6
 -3 -5 -2 91.0786 6.33329 3
 3 -5 2 85.9009 6.52563 3
 3 -5 2 86.835 6.63789 4
 3 -5 2 87.8935 7.12781 1
 3 5 2 107.275 5.95942 2
 3 5 2 87.587 6.69556 1
 3 5 2 89.7088 5.59384 5
 -3 5 -2 104.775 7.41055 5
 5 -5 2 266.064 11.3549 4
 -5 -5 -2 239.242 11.3298 3
 5 -5 2 265.084 12.3666 1
 5 -5 2 245.922 12.9378 6
 -5 -5 -2 278.92 11.0407 2
 -5 5 -2 268.085 12.6835 5
 5 5 2 274.594 10.8676 2
 5 5 2 261.957 12.1895 1
 -7 -5 -2 37.3036 5.54937 3
 -7 -5 -2 53.0466 5.94106 2
 7 -5 2 42.3434 5.93225 1
 7 -5 2 46.2194 7.20479 6
 -7 5 -2 55.8683 7.07467 5
 7 5 2 45.7959 6.22968 1
 9 -5 2 5.49128 5.41743 6
 -9 -5 -2 6.80155 4.22571 2
 -9 -5 -2 -2.7867 3.92831 3
 -9 5 -2 9.18992 5.55337 5
 9 5 2 9.19577 4.83194 1
 -11 -5 -2 0.05084 4.37551 2
 11 -5 2 5.28376 5.9735 6
 11 -5 2 3.01115 2.45228 2
 11 5 2 7.98713 4.79745 1
 -11 5 -2 4.03821 6.25965 5
 -11 5 -2 -1.92 3.78651 4
 -13 -5 -2 3.65369 4.7898 2
 13 -5 2 13.0168 6.44855 6
 13 -5 2 7.6356 2.92076 2
 -13 5 -2 0.67664 4.35806 4
 13 5 2 1.60771 5.15103 1
 15 -5 2 19.5768 7.00754 6
 -15 -5 -2 11.3186 4.90993 2
 15 -5 2 11.1897 3.55298 2
 15 5 2 12.1941 4.67904 2
 -15 5 -2 6.73892 4.88681 4
 15 5 2 8.83246 5.3249 1
 17 -5 2 10.9334 7.3653 6
 -17 -5 -2 10.7706 5.15383 2
 -17 5 -2 6.73761 5.00864 4
 17 5 2 8.24281 4.64872 2
 -17 5 -2 7.70029 7.65733 5
 -19 -5 -2 22.4408 6.67112 2
 19 -5 2 29.4423 8.20613 6
 -19 5 -2 38.3987 8.3734 5
 -19 5 -2 28.7084 6.10553 4
 19 5 2 23.0089 5.39616 2
 21 -5 2 45.2305 8.6503 6
 21 5 2 39.6539 6.05879 2
 22 -6 -2 -7.4619 8.6198 6
 -22 6 2 0.62857 7.51727 4
 22 6 -2 -13.082 6.57923 2
 22 6 -2 -8.6234 6.82534 1
 20 6 -2 4.14299 6.12934 1
 -20 6 2 4.08298 6.77591 4
 20 6 -2 8.96542 6.21769 2
 18 -6 -2 0.20334 7.48539 6
 18 6 -2 6.15392 5.68106 2
 -18 6 2 10.5946 6.1855 4
 18 6 -2 8.38972 5.68651 1
 16 -6 -2 1.22381 7.19181 6
 16 6 -2 4.1292 5.15737 2
 16 6 -2 2.05138 5.49841 1
 -16 6 2 -0.2855 7.26997 5
 14 -6 -2 14.675 6.96389 6
 14 6 -2 -2.0536 5.12553 1
 14 6 -2 6.20423 4.99286 2
 -14 6 2 -2.299 6.3657 5
 -14 6 2 0.12574 3.97933 2
 -12 -6 2 10.7529 5.35528 2
 12 -6 -2 17.9025 7.08044 6
 -12 6 2 15.1924 6.56617 5
 12 6 -2 1.15862 5.39284 1
 12 6 -2 15.1428 4.548 2
 12 6 -2 2.44659 6.69914 6
 -10 -6 2 3.01191 4.61463 3
 10 6 -2 14.8751 7.00825 6
 -8 -6 2 6.20699 4.73392 3
 8 6 -2 19.998 6.80687 6
 -8 6 2 17.2529 6.52453 6
 -6 -6 2 47.1005 6.55837 3
 6 -6 -2 29.5046 4.92108 4
 -6 -6 2 45.6226 5.92909 2
 6 -6 -2 38.7331 6.29111 1
 -6 6 2 49.8108 7.39181 5
 6 6 -2 23.6966 7.25239 6
 6 6 -2 37.8914 6.54339 1
 -6 6 2 30.6693 7.34243 6
 4 -6 -2 -1.8619 3.8993 4
 4 -6 -2 2.97269 3.25775 2
 -4 -6 2 3.75887 3.21122 2
 4 -6 -2 3.67122 4.98999 1
 -4 -6 2 -1.3117 4.22226 3
 4 6 -2 -9.8062 5.9202 6
 -4 6 2 1.58697 3.08179 2
 -4 6 2 5.50111 4.74929 5
 -4 6 2 -2.4504 6.37508 6
 -2 -6 2 -1.6351 4.26603 3
 2 -6 -2 9.17793 4.49448 3
 2 -6 -2 8.00417 3.97494 4
 2 -6 -2 13.0785 3.47669 2
 2 -6 -2 11.1964 5.25015 1
 -2 -6 2 3.01596 5.17594 1
 -2 6 2 5.52745 4.5875 5
 -2 6 2 5.07284 6.73806 6
 2 6 -2 6.41647 6.13966 6
 0 -6 2 -5.1748 5.26746 1
 0 -6 -2 1.60973 4.99867 1
 0 -6 -2 12.059 3.55246 2
 0 -6 2 -2.0431 4.40713 3
 0 -6 -2 5.30562 4.33433 3
 0 -6 2 2.54652 4.05053 4
 0 6 2 5.42817 6.35918 6
 0 6 2 4.57273 4.27902 5
 0 6 -2 12.0838 5.76258 6
 -2 -6 -2 9.67826 3.93336 2
 2 -6 2 3.60273 4.1906 4
 2 -6 2 -3.7343 4.22685 3
 2 -6 2 -4.0802 5.1433 1
 2 6 2 4.43977 6.2994 6
 -2 6 -2 12.8318 6.10129 6
 4 -6 2 0.24046 4.83645 1
 -4 -6 -2 12.2043 4.21562 2
 4 -6 2 7.7646 4.49302 4
 4 -6 2 5.52067 4.35481 3
 4 6 2 9.23803 6.69735 6
 4 6 2 4.44606 4.42262 1
 -6 -6 -2 17.2279 4.75199 2
 6 -6 2 17.0495 4.98222 4
 -6 -6 -2 4.84248 4.75364 3
 8 -6 2 20.9238 6.74006 6
 -8 -6 -2 9.64787 5.07413 3
 -8 -6 -2 23.2495 5.2861 2
 10 -6 2 0.88711 6.76285 6
 10 -6 2 16.8098 5.8387 1
 -10 -6 -2 2.39347 4.89861 3
 -10 -6 -2 11.2972 5.58119 2
 10 6 2 8.26094 5.24732 1
 -10 6 -2 21.1406 6.90492 5
 12 -6 2 11.6955 6.59616 6
 -12 -6 -2 -0.805 5.39869 2
 -12 6 -2 6.10733 7.03102 5
 12 6 2 0.8031 5.7411 1
 -14 -6 -2 -2.4847 5.57825 2
 -14 6 -2 -4.6809 7.40168 5
 14 6 2 0.44894 5.78498 1
 16 -6 2 -1.2254 7.9462 6
 -16 -6 -2 8.43515 6.77015 2
 -16 6 -2 8.36145 6.04476 4
 16 6 2 2.34118 5.14094 2
 16 6 2 9.92345 6.41982 1
 -18 -6 -2 16.2491 6.57766 2
 18 6 2 11.4501 7.2763 1
 18 6 2 11.6466 6.00804 2
 -18 6 -2 8.48273 7.03335 4
 17 7 -2 11.4278 6.50646 1
 17 7 -2 6.17407 6.89026 2
 15 -7 -2 -4.5177 5.79221 1
 15 7 -2 -11.387 10.2113 6
 -15 7 2 19.8751 8.52039 5
 15 7 -2 4.46092 6.29716 1
 15 7 -2 0.52164 6.42449 2
 13 -7 -2 3.362 5.78542 1
 -13 7 2 14.6192 8.02609 5
 13 7 -2 0.33569 5.90278 2
 13 7 -2 -1.0586 5.40288 1
 11 -7 -2 1.92662 5.60966 1
 11 7 -2 8.7952 8.765 6
 11 7 -2 -4.8624 5.17581 1
 11 7 -2 6.28373 5.44962 2
 -9 -7 2 7.81351 5.9793 2
 9 -7 -2 2.21862 5.29456 1
 -9 -7 2 1.24148 5.1896 3
 9 7 -2 12.2476 5.31294 2
 -9 7 2 23.0915 7.31538 5
 9 7 -2 8.23448 5.4091 1
 -9 7 2 7.76794 4.24212 2
 9 7 -2 3.20209 7.99831 6
 7 -7 -2 2.12653 5.68557 1
 -7 -7 2 1.77149 5.0973 3
 -7 7 2 17.3353 7.35839 6
 7 7 -2 13.34 4.49395 2
 7 7 -2 4.01508 5.13948 1
 -7 7 2 15.3833 6.98544 5
 7 7 -2 16.6167 8.43729 6
 5 -7 -2 25.7295 5.66741 3
 5 -7 -2 25.0781 4.51068 2
 5 -7 -2 26.9123 5.77968 4
 5 -7 -2 23.1055 5.87128 1
 -5 -7 2 31.0659 5.67892 3
 -5 7 2 45.571 8.9082 5
 5 7 -2 26.4646 8.58719 6
 -5 7 2 27.9134 4.65248 2
 -5 7 2 14.6762 7.37967 6
 3 -7 -2 39.6863 6.9179 1
 3 -7 -2 38.9227 5.80035 4
 -3 -7 2 37.5967 6.52597 3
 -3 -7 2 35.206 5.93197 4
 3 -7 -2 47.0522 7.06763 3
 3 7 -2 46.4729 8.37648 6
 -3 7 2 50.4739 8.79476 6
 -3 7 2 44.1454 7.08271 5
 -1 -7 2 15.1324 5.2896 3
 1 -7 -2 17.6286 5.06455 3
 1 -7 -2 13.33 5.29324 4
 -1 -7 2 24.4189 6.30734 1
 1 -7 -2 28.0812 6.1103 1
 1 -7 -2 29.422 4.96646 2
 -1 -7 2 9.92569 5.4429 4
 -1 7 2 23.7322 8.24711 6
 1 7 -2 24.8091 7.3633 6
 -1 -7 -2 31.9727 5.58782 3
 1 -7 2 38.8074 7.46447 1
 1 -7 2 23.9559 5.84475 4
 1 -7 2 29.1954 5.76001 3
 1 7 2 53.8547 10.0084 6
 -1 7 -2 44.8635 8.55876 6
 3 -7 2 70.339 9.17447 4
 -3 -7 -2 57.5513 8.00074 3
 3 -7 2 56.6921 7.55692 3
 3 -7 2 61.2424 7.95936 1
 3 7 2 66.8388 10.0071 6
 5 -7 2 65.2215 8.19115 1
 5 -7 2 79.0288 9.78244 4
 5 -7 2 60.1997 7.46867 3
 -5 -7 -2 57.0428 7.98674 3
 5 7 2 82.0762 10.5487 6
 7 -7 2 23.4407 5.5194 3
 -7 -7 -2 20.9612 6.0879 3
 7 -7 2 20.1743 5.71746 1
 7 7 2 22.2007 8.64519 6
 7 7 2 25.1489 5.88548 1
 9 -7 2 18.4446 7.53799 6
 -9 -7 -2 -6.0051 5.84266 3
 9 -7 2 -2.2775 5.28061 3
 -9 -7 -2 12.5906 6.31616 2
 9 -7 2 8.39516 5.51092 1
 9 7 2 5.7295 5.73923 1
 11 -7 2 9.27288 5.66741 1
 11 -7 2 1.13182 5.64206 3
 11 -7 2 15.448 8.34355 6
 -11 -7 -2 -4.5985 7.03949 2
 11 7 2 -0.8751 6.12165 1
 -13 -7 -2 -5.4113 7.17186 2
 13 -7 2 -1.9654 6.17193 3
 13 -7 2 3.58665 6.65346 1
 13 7 2 3.35669 6.29264 1
 15 -7 2 9.7955 7.60807 1
 15 -7 2 -9.0373 8.78246 6
 -15 -7 -2 -4.8578 7.67916 2
 15 -7 2 2.25658 7.28514 3
 15 7 2 7.82557 7.69679 1
 15 7 2 0.66764 6.19731 2
 12 -8 -2 21.0916 6.97005 3
 12 -8 -2 0.33281 7.28808 1
 12 8 -2 -1.3926 6.34863 1
 12 8 -2 13.0507 7.69732 2
 10 -8 -2 12.7953 6.02049 3
 10 -8 -2 16.4273 7.22564 1
 -10 -8 2 15.8087 6.6959 3
 10 8 -2 14.0443 11.2972 6
 10 8 -2 7.56023 5.88428 1
 -10 8 2 27.5985 10.0098 5
 10 8 -2 18.3062 7.21925 2
 -8 -8 2 0.63813 5.51857 3
 8 -8 -2 9.61332 6.10594 3
 8 -8 -2 9.44294 6.59044 1
 8 8 -2 10.1657 6.63688 2
 -6 -8 2 0.1033 5.76265 3
 6 -8 -2 -0.3946 5.33671 3
 6 -8 -2 -6.6659 5.66368 1
 -6 8 2 11.0508 8.43659 6
 -6 8 2 9.84554 9.06001 5
 4 -8 -2 12.4145 5.60563 3
 -4 -8 2 -2.6949 6.7286 4
 -4 -8 2 6.05296 5.90383 3
 4 -8 -2 6.73965 6.82899 4
 4 -8 -2 7.72078 5.86636 1
 -4 8 2 12.8718 8.2383 6
 4 8 -2 27.2834 8.68029 6
 -2 -8 2 -2.0853 6.75034 4
 2 -8 -2 0.5406 5.39609 3
 2 -8 -2 -0.2381 6.68786 4
 2 -8 -2 14.2769 6.43258 1
 -2 -8 2 -3.3856 5.28799 3
 -2 8 2 5.65762 7.80673 6
 0 -8 -2 1.60985 6.80258 4
 0 -8 2 11.0984 5.75991 3
 0 -8 -2 6.59234 5.4707 3
 0 -8 2 -0.5706 6.84377 4
 0 -8 2 18.8779 6.10141 1
 0 8 2 19.5332 8.52559 6
 2 -8 2 1.18526 5.35173 3
 -2 -8 -2 -0.421 6.95019 4
 -2 -8 -2 -1.4596 5.50471 3
 2 -8 2 4.50686 6.06882 1
 2 -8 2 3.03582 6.9009 4
 -4 -8 -2 4.90062 6.19476 3
 4 -8 2 16.4091 7.89614 4
 4 -8 2 5.30808 5.61835 3
 4 -8 2 4.13306 6.44145 1
 4 8 2 37.2038 10.0779 6
 -6 -8 -2 27.279 7.30364 3
 6 -8 2 24.2183 6.69971 1
 6 -8 2 43.1343 7.90287 3
 8 -8 2 45.4673 7.55361 1
 -8 -8 -2 35.2549 7.85403 3
 -8 -8 -2 40.8891 8.85773 2
 8 -8 2 58.7072 8.70727 3
 30 0 -3 13.1294 5.21677 2
 28 0 -3 9.07141 4.33459 2
 28 0 -3 9.60013 4.36248 2
 26 0 -3 2.52339 3.63572 2
 -26 0 3 2.48969 5.43605 5
 26 0 -3 6.3059 3.80762 2
 -24 0 3 -1.9918 4.83832 5
 24 0 -3 -4.5759 3.29128 2
 24 0 -3 1.21535 3.32247 2
 22 0 -3 -4.8417 3.1227 2
 -22 0 3 -1.7239 4.23404 5
 -20 0 3 -3.872 3.79073 5
 -18 0 3 -0.2266 3.46658 5
 18 0 -3 0.12648 2.41246 2
 18 0 -3 0.25714 2.36202 2
 16 0 -3 -2.8066 2.26609 2
 16 0 -3 -4.2641 2.12046 2
 14 0 -3 3.97691 2.21495 2
 14 0 -3 3.92178 2.08254 2
 -12 0 3 2.6634 2.00673 2
 12 0 -3 4.02023 1.88474 2
 -10 0 3 1.98026 1.78047 2
 10 0 -3 0.9504 1.62103 2
 8 0 -3 -0.9851 1.53439 2
 -8 0 3 -1.2504 1.6466 2
 -6 0 3 -0.2274 1.47858 2
 6 0 -3 0.39316 1.39785 2
 4 0 -3 -0.0994 0.95648 2
 -4 0 3 0.28859 0.9578 2
 -2 0 3 -0.546 0.72176 2
 0 0 -3 0.45573 0.9336 4
 0 0 -3 -1.0057 0.96105 2
 0 0 3 0.20742 0.96762 2
 2 0 3 -1.0792 1.48061 2
 -2 0 -3 0.93181 1.47135 2
 4 0 3 -0.688 1.69396 5
 -4 0 -3 -1.4306 1.51684 2
 4 0 3 -1.6239 1.59368 2
 6 0 3 -1.3735 1.79463 5
 6 0 3 -2.6089 1.66367 2
 -6 0 -3 -1.8684 1.69824 2
 8 0 3 -3.4578 1.95942 2
 8 0 3 0.58258 2.04597 5
 -8 0 -3 -3.5934 1.96444 2
 10 0 3 0.07806 2.18958 5
 12 0 3 2.15206 2.23585 2
 12 0 3 0.59494 2.31473 2
 -12 0 -3 -1.4204 2.48605 2
 14 0 3 4.65632 2.59101 2
 14 0 3 2.78531 2.4653 2
 -14 0 -3 2.04021 2.86157 2
 18 0 3 9.59672 3.34522 2
 18 0 3 6.85799 3.42753 2
 20 0 3 1.21132 3.05275 2
 20 0 3 -0.3824 3.34842 2
 22 0 3 0.32197 3.59263 2
 22 0 3 -5.9343 3.64021 2
 24 0 3 4.57658 4.03662 2
 26 0 3 1.75766 4.7803 2
 29 -1 -3 57.048 8.63288 2
 29 1 -3 69.1128 8.27953 2
 27 -1 -3 42.3956 7.23481 2
 27 -1 -3 26.6348 4.755 2
 27 1 -3 27.862 4.64215 2
 -27 1 3 29.3874 6.86414 5
 27 1 -3 46.5206 7.34861 2
 -25 -1 3 125.619 8.35955 5
 25 -1 -3 140.348 8.82107 2
 25 -1 -3 138.742 8.77861 2
 25 1 -3 134.812 8.76671 2
 25 1 -3 142.925 8.87596 2
 23 -1 -3 2.94992 3.43985 2
 23 -1 -3 -0.7321 3.3575 2
 -23 -1 3 -0.0233 4.45171 5
 23 1 -3 -1.3126 3.23468 2
 -23 1 3 -1.6961 4.86389 5
 23 1 -3 0.28467 3.24503 2
 -21 -1 3 0.18725 3.64833 5
 21 -1 -3 -3.6775 3.01532 2
 21 -1 -3 -4.9586 2.96161 2
 -21 1 3 -4.703 4.62832 5
 21 1 -3 -3.4668 3.36949 2
 19 -1 -3 -5.2212 2.55992 2
 -19 -1 3 -6.0454 3.24203 5
 19 -1 -3 -0.0792 2.64621 2
 19 1 -3 -4.8018 2.62786 2
 19 1 -3 -2.0687 2.78063 2
 -19 1 3 -4.0922 3.95356 5
 17 -1 -3 47.923 4.35937 2
 17 -1 -3 43.1547 4.25382 2
 -17 1 3 45.9934 4.68267 2
 17 1 -3 56.1596 4.73679 2
 17 1 -3 41.8823 4.53782 2
 -17 1 3 45.7193 5.32505 5
 15 -1 -3 250.739 9.79449 2
 15 1 -3 254.72 9.94569 2
 15 1 -3 261.605 10.0805 2
 -15 1 3 245.607 10.0296 2
 13 -1 -3 2398.17 81.1559 2
 13 1 -3 2482.29 81.2955 2
 -13 1 3 2478.53 81.2241 2
 13 1 -3 2372.36 81.2012 2
 11 -1 -3 548.014 18.9994 2
 11 1 -3 538.655 19.0193 2
 -11 1 3 557.27 19.0709 2
 11 1 -3 556.071 19.1093 2
 -9 -1 3 126.492 5.47651 2
 9 -1 -3 137.808 5.47455 2
 9 1 -3 127.346 5.39622 2
 -9 1 3 134.46 5.51191 2
 9 1 -3 132.487 5.54048 2
 -7 -1 3 428.486 15.1827 2
 7 -1 -3 453.989 17.3313 6
 7 -1 -3 442.039 15.2229 2
 7 1 -3 430.991 15.2018 2
 -7 1 3 450.659 15.2571 2
 5 -1 -3 1275.77 42.0782 2
 5 -1 -3 1269.91 48.2479 6
 -5 -1 3 1232.29 41.9906 2
 -5 1 3 1272.87 42.0903 2
 -5 1 3 1293.98 48.0465 6
 5 1 -3 1225.4 41.9962 2
 -3 -1 3 1179.37 40.2205 2
 3 -1 -3 1216.7 40.4105 2
 -3 -1 3 1230.12 46.0351 6
 -3 1 3 1236.24 40.4247 2
 3 1 -3 1158.21 40.4421 2
 3 1 -3 1188.8 46.0838 6
 3 1 -3 1254.21 41.6443 3
 3 1 -3 1232.76 44.3995 1
 -1 -1 3 3973.54 134.566 2
 1 -1 -3 4033.34 135.151 2
 -1 -1 3 4157.01 138.952 3
 -1 -1 3 4078.68 136.058 4
 -1 -1 3 4225.77 148.4 1
 1 -1 -3 4163.98 148.075 1
 -1 1 3 3913.1 134.97 2
 1 1 -3 4066.88 148.157 1
 1 1 -3 4039.77 139.108 3
 1 1 -3 3959.09 134.453 2
 1 -1 3 145.059 5.32803 2
 1 -1 3 159.092 5.8851 3
 1 -1 3 149.072 5.93219 4
 -1 -1 -3 147.192 5.91711 2
 -1 1 -3 154.038 5.93338 4
 -1 1 -3 144.801 5.33005 2
 1 1 3 148.311 5.88145 2
 -3 -1 -3 1.91067 1.05062 3
 3 -1 3 0.87585 1.27529 2
 3 -1 3 0.55743 2.01801 5
 -3 -1 -3 0.81219 1.66435 2
 -3 1 -3 0.17403 1.31586 2
 -3 1 -3 0.92609 1.71525 4
 3 1 3 -0.6161 1.80584 2
 5 -1 3 169.522 6.39634 2
 -5 -1 -3 163.868 6.77973 2
 5 -1 3 172.484 7.4803 5
 5 1 3 182.516 6.21121 3
 5 1 3 163.881 6.82841 2
 -5 1 -3 172.388 6.49617 2
 7 -1 3 10.7668 1.86721 2
 7 -1 3 12.722 2.52628 5
 7 -1 3 11.1779 1.94262 2
 -7 -1 -3 7.16225 2.13684 2
 -7 1 -3 8.29356 1.99133 2
 -7 1 -3 7.67451 2.84464 5
 7 1 3 11.2158 2.20322 5
 7 1 3 6.7651 2.30016 2
 7 1 3 8.54585 1.6351 3
 9 -1 3 0.66026 2.59868 5
 9 -1 3 0.2185 1.8801 2
 9 -1 3 -3.5351 1.9056 2
 9 1 3 3.6543 1.37226 3
 -9 1 -3 -4.947 2.98156 5
 9 1 3 -0.4715 1.79749 5
 11 -1 3 289.743 10.7914 2
 11 -1 3 284.233 10.7043 2
 -11 -1 -3 284.19 11.1513 2
 11 -1 3 280.757 11.8851 5
 11 1 3 286.143 11.1201 2
 -11 1 -3 287.504 12.1377 5
 -13 -1 -3 270.925 11.115 2
 13 -1 3 273.672 10.7066 2
 13 -1 3 277.921 10.7402 2
 -13 1 -3 280.611 12.1243 5
 13 1 3 276.548 11.1554 2
 15 -1 3 626.91 22.1017 2
 -15 -1 -3 635.922 22.477 2
 15 -1 3 594.964 22.0535 2
 15 1 3 630.527 22.3753 2
 15 1 3 615.394 22.3285 2
 -17 -1 -3 1019.19 35.8268 2
 17 -1 3 993.527 35.502 2
 17 -1 3 1020.35 35.5267 2
 17 1 3 1017.49 35.6775 2
 17 1 3 1048.44 35.8524 2
 19 -1 3 33.0902 4.42343 2
 19 -1 3 37.5058 4.58209 2
 19 1 3 29.5476 4.8503 2
 19 1 3 35.5681 4.46699 2
 21 -1 3 -2.7182 3.42166 2
 21 -1 3 -0.2989 3.36986 2
 21 1 3 -6.6584 3.63696 2
 21 1 3 -0.9237 3.66075 2
 23 -1 3 27.4302 4.55748 2
 23 -1 3 29.3714 4.85237 2
 23 1 3 23.1326 5.13506 2
 23 1 3 30.2546 4.85706 2
 25 -1 3 4.41119 5.2849 2
 25 -1 3 11.808 5.25627 2
 25 1 3 7.46423 4.76716 2
 30 -2 -3 18.2434 6.6802 2
 30 2 -3 10.413 4.88671 2
 -30 2 3 19.1052 9.47367 5
 28 -2 -3 0.51528 4.90183 2
 28 -2 -3 11.2838 5.40774 2
 28 2 -3 6.45771 4.62665 2
 26 -2 -3 3.65981 4.41329 2
 26 -2 -3 6.77661 4.56398 2
 26 2 -3 9.41812 4.17935 2
 -26 2 3 12.0923 6.38233 5
 24 -2 -3 -0.8983 3.63078 2
 24 -2 -3 0.70529 3.92668 2
 24 2 -3 9.55811 4.14791 2
 -24 2 3 1.35614 5.55226 5
 24 2 -3 0.78133 3.52529 2
 22 -2 -3 31.3223 4.52695 2
 22 -2 -3 33.4149 4.39513 2
 22 2 -3 30.1562 4.48278 2
 22 2 -3 26.1743 4.34087 2
 -22 2 3 31.5954 6.06196 5
 -20 -2 3 54.5467 4.67315 5
 20 -2 -3 46.1121 5.84181 2
 -20 2 3 51.9266 6.33503 5
 20 2 -3 50.7899 5.03632 2
 20 2 -3 51.477 4.87209 2
 18 -2 -3 11.4899 2.95607 2
 18 -2 -3 12.6016 3.04807 2
 -18 -2 3 13.8052 2.91762 5
 -18 2 3 15.6513 3.40915 2
 18 2 -3 14.6947 3.20175 2
 -18 2 3 11.9371 4.53377 5
 18 2 -3 16.2631 3.41759 2
 16 -2 -3 174.884 7.62775 2
 -16 2 3 176.179 9.24815 5
 -16 2 3 174.794 7.85462 2
 16 2 -3 171.633 7.82433 2
 16 2 -3 164.331 7.93783 2
 14 -2 -3 147.006 7.58021 6
 14 -2 -3 145.971 6.55193 2
 -14 2 3 148.408 6.76482 2
 -14 2 3 141.852 7.81123 5
 14 2 -3 143.362 6.98562 2
 14 2 -3 146.163 6.73599 2
 12 -2 -3 120.879 6.45737 6
 12 -2 -3 114.129 5.46937 2
 12 2 -3 114.796 5.87426 2
 12 2 -3 122.919 5.78141 2
 -12 2 3 118.304 5.69134 2
 10 -2 -3 148.784 7.47635 6
 10 -2 -3 155.232 6.36159 2
 -10 2 3 154.583 6.41403 2
 10 2 -3 153.95 6.6108 2
 10 2 -3 158.458 6.61519 2
 10 2 -3 169.125 6.72431 3
 8 -2 -3 13.6073 2.46124 2
 8 -2 -3 18.89 3.00839 6
 -8 2 3 12.5378 1.86373 2
 8 2 -3 8.4726 1.92354 2
 -8 2 3 9.78349 2.64995 6
 8 2 -3 11.9393 2.10007 3
 8 2 -3 11.9455 1.98515 2
 6 -2 -3 264.836 10.8238 6
 6 -2 -3 257.099 9.12347 2
 -6 2 3 250.731 10.7407 6
 6 2 -3 262.364 9.67042 3
 -6 2 3 253.552 9.13976 2
 6 2 -3 250.563 9.1132 2
 -6 2 3 249.05 8.98865 4
 6 2 -3 248.86 9.0989 2
 -4 -2 3 59.2651 3.82897 3
 4 -2 -3 64.3525 3.18204 2
 -4 2 3 64.2738 3.16404 2
 4 2 -3 56.6279 3.99244 6
 4 2 -3 56.4537 2.90678 2
 4 2 -3 47.5512 2.92855 2
 4 2 -3 47.6999 4.10799 1
 -4 2 3 60.6167 4.29741 6
 2 -2 -3 6882.57 236.262 1
 2 -2 -3 6211.42 214.879 2
 -2 -2 3 6198.1 246.584 6
 -2 -2 3 6724.94 221.528 3
 -2 -2 3 6612.39 236.531 1
 -2 -2 3 6168.74 235.891 5
 2 2 -3 6556.79 221.39 3
 2 2 -3 6453.32 246.709 6
 -2 2 3 6462.6 215.185 2
 2 2 -3 6602.15 236.367 1
 0 -2 3 1791.01 64.6845 1
 0 -2 3 1727.48 64.4505 5
 0 -2 -3 1809.6 64.5719 1
 0 -2 3 1775.73 59.1619 4
 0 -2 3 1716.25 67.2076 6
 0 -2 -3 1704.91 58.7295 2
 0 -2 3 1838.18 60.6031 3
 0 2 3 1796.1 64.5426 1
 0 2 3 1703.25 58.7309 2
 2 -2 3 45.5579 3.4722 4
 -2 -2 -3 46.2222 3.41288 2
 2 -2 3 48.9464 4.09144 5
 2 2 3 45.9175 3.29874 2
 -2 2 -3 57.2575 3.48107 4
 2 2 3 44.8802 3.54503 1
 -4 -2 -3 134.175 5.99463 2
 4 -2 3 144.128 5.19719 2
 4 -2 3 138.768 6.74641 5
 4 -2 3 144.864 5.17224 2
 -4 -2 -3 141.151 5.66399 3
 -4 2 -3 141.9 6.05964 4
 -4 2 -3 141.536 6.91195 5
 4 2 3 137.385 5.99482 2
 6 -2 3 9.23991 2.93549 5
 -6 -2 -3 7.86599 2.36093 2
 6 -2 3 9.55727 1.67165 2
 6 2 3 6.39871 2.38269 2
 -6 2 -3 10.2654 2.26535 4
 -6 2 -3 13.7461 3.27158 5
 -8 -2 -3 -1.9284 2.33577 2
 8 -2 3 -2.6853 1.6913 2
 8 -2 3 2.25941 1.66627 2
 8 -2 3 -1.9377 2.92818 5
 -8 2 -3 -3.1683 3.32023 5
 -8 2 -3 -2.6982 2.35292 4
 8 2 3 -3.158 2.33995 2
 10 -2 3 60.851 3.96544 2
 10 -2 3 67.6152 5.40066 5
 -10 -2 -3 60.3815 4.95779 2
 10 -2 3 69.817 3.90807 2
 10 2 3 65.444 3.62633 3
 10 2 3 61.4286 4.78515 2
 -10 2 -3 51.9221 6.1142 5
 -12 -2 -3 18.5167 3.2921 2
 12 -2 3 21.4501 2.65087 2
 12 -2 3 20.2076 3.42181 2
 12 2 3 15.9668 2.87414 3
 -12 2 -3 19.1879 4.39405 5
 12 2 3 19.8661 3.22134 2
 14 -2 3 11.1144 2.83452 2
 -14 -2 -3 13.0591 3.58212 2
 14 -2 3 10.4815 2.74496 2
 14 2 3 12.0189 3.27304 2
 -14 2 -3 17.2183 4.69838 5
 16 -2 3 33.3008 5.16325 2
 16 -2 3 37.9973 5.22535 2
 -16 -2 -3 51.2658 6.40801 2
 16 2 3 50.805 6.02705 2
 -16 2 -3 64.5499 8.54284 5
 -18 -2 -3 0.67444 4.30599 2
 18 -2 3 -4.8034 3.46669 2
 18 -2 3 -2.7925 3.23613 2
 18 2 3 -0.0321 3.53282 2
 20 -2 3 5.96777 3.74295 2
 20 -2 3 0.07895 3.79921 2
 20 2 3 0.83396 3.62679 2
 20 2 3 5.06428 2.91205 3
 20 2 3 -0.3723 3.79165 2
 22 -2 3 6.83419 4.21356 2
 22 -2 3 5.58666 4.21651 2
 22 2 3 10.7941 4.42097 2
 24 -2 3 9.39956 5.21195 2
 24 2 3 1.99628 4.32856 2
 29 -3 -3 -5.5807 6.58536 2
 27 -3 -3 -0.8615 4.84434 2
 27 -3 -3 -6.5874 5.25958 2
 27 3 -3 8.30305 4.27676 2
 27 3 -3 -2.1153 5.46681 3
 -27 3 3 0.61492 7.16668 5
 25 -3 -3 14.3548 4.71474 2
 25 -3 -3 13.437 4.97258 2
 25 -3 -3 23.6096 7.41262 6
 25 3 -3 16.291 5.14743 3
 25 3 -3 25.2895 4.82248 2
 23 -3 -3 -4.6399 4.00885 2
 23 -3 -3 -2.6641 3.94933 2
 23 -3 -3 -4.3085 5.72486 6
 23 3 -3 -7.0852 3.93189 3
 23 3 -3 -1.2402 4.08394 2
 21 -3 -3 -3.3011 3.88698 2
 21 -3 -3 1.23459 3.73596 2
 21 -3 -3 5.02492 5.50875 6
 -21 3 3 0.54964 5.38296 5
 21 3 -3 -0.4133 4.13983 2
 21 3 -3 4.07189 3.78687 3
 19 -3 -3 41.2998 6.71205 6
 19 -3 -3 26.729 4.3312 2
 19 3 -3 38.2709 5.13209 3
 19 3 -3 36.9903 4.51302 2
 19 3 -3 38.7167 6.49821 2
 -19 3 3 30.2217 6.0686 5
 -19 3 3 39.1577 5.83607 2
 17 -3 -3 8.79875 3.03439 2
 17 -3 -3 15.5716 4.33821 6
 17 3 -3 10.839 3.38151 2
 -17 3 3 12.9175 3.59596 2
 17 3 -3 13.913 3.3126 3
 17 3 -3 11.8876 3.40951 2
 -17 3 3 14.0712 4.94669 5
 15 -3 -3 173.593 9.0936 6
 15 -3 -3 174.718 7.79816 2
 15 3 -3 164.394 8.02262 2
 15 3 -3 177.868 8.5841 2
 -15 3 3 182.094 7.89314 2
 15 3 -3 173.406 7.91615 3
 -15 3 3 158.439 9.36795 5
 13 -3 -3 435.368 15.8047 2
 13 -3 -3 441.11 18.4148 6
 -13 3 3 443.256 15.8164 2
 -13 3 3 417.093 17.97 5
 13 3 -3 440.085 16.4127 3
 13 3 -3 456.189 16.2422 2
 13 3 -3 431.545 16.0024 2
 -13 3 3 450.895 16.02 4
 11 -3 -3 170.556 7.1761 2
 11 -3 -3 168.223 8.63873 6
 11 3 -3 171.664 7.50277 2
 11 3 -3 169.117 7.53649 3
 -11 3 3 168.121 8.78705 5
 -11 3 3 168.84 7.10265 2
 11 3 -3 173.37 7.35554 2
 -11 3 3 180.962 7.32154 4
 9 -3 -3 77.7255 3.9473 2
 -9 -3 3 66.3665 4.46872 2
 9 -3 -3 77.1671 5.62168 6
 -9 3 3 69.026 5.60608 6
 9 3 -3 73.0692 4.52549 2
 -9 3 3 73.0882 5.90905 5
 9 3 -3 74.5581 4.46286 2
 -9 3 3 80.4216 4.18308 2
 9 3 -3 78.1377 4.68002 3
 -9 3 3 75.745 4.20866 4
 -7 -3 3 179.655 7.25077 2
 7 -3 -3 201.713 9.04177 6
 7 -3 -3 189.817 7.15523 2
 -7 -3 3 178.696 7.80986 3
 -7 -3 3 174.122 7.63443 5
 -7 3 3 195.5 7.20453 2
 -7 3 3 185.183 7.2074 4
 7 3 -3 179.684 7.35695 2
 7 3 -3 182.856 7.27999 2
 7 3 -3 196.034 8.73731 1
 -7 3 3 180.011 8.98989 6
 7 3 -3 196.421 8.02488 3
 -5 -3 3 61.2948 4.19399 5
 -5 -3 3 70.674 4.47526 3
 5 -3 -3 72.7965 3.726 2
 -5 -3 3 70.4317 3.68703 2
 5 -3 -3 66.0484 3.72392 4
 5 3 -3 78.6441 4.67035 3
 5 3 -3 75.525 5.16432 6
 -5 3 3 68.5144 5.47543 6
 5 3 -3 65.5462 3.62726 2
 5 3 -3 74.6912 5.16498 1
 -5 3 3 78.8137 3.81836 2
 3 -3 -3 476.291 16.0157 4
 -3 -3 3 466.914 18.2333 1
 3 -3 -3 463.375 18.1237 1
 -3 -3 3 446.729 17.678 5
 -3 -3 3 481.735 17.0001 3
 -3 -3 3 455.859 15.7048 2
 3 -3 -3 453.173 16.0931 2
 -3 3 3 481.912 18.9916 6
 3 3 -3 468.847 18.7739 6
 3 3 -3 481.901 18.1288 1
 -3 3 3 475.496 16.1285 2
 3 3 -3 414.553 15.7039 2
 -1 -3 3 640.073 24.8996 5
 1 -3 -3 634.808 22.6082 2
 1 -3 -3 671.936 25.1864 1
 -1 -3 3 663.716 23.5759 3
 -1 -3 3 695.607 25.3275 1
 -1 -3 3 662.509 26.1086 6
 -1 3 3 635.365 22.6411 2
 1 3 -3 686.034 26.228 6
 1 -3 3 167.897 8.23243 1
 1 -3 3 178.84 8.47767 6
 -1 -3 -3 162.968 7.99239 1
 1 -3 3 178.392 7.21861 4
 1 -3 3 176.739 7.58149 3
 1 -3 3 160.642 7.90443 5
 -1 -3 -3 176.969 7.1132 2
 1 3 3 186.122 7.97591 1
 1 3 3 174.941 7.11332 2
 -3 -3 -3 26.7184 3.19298 3
 3 -3 3 27.0641 4.32837 6
 -3 -3 -3 20.398 3.47975 2
 3 -3 3 24.3068 3.68309 4
 3 -3 3 29.2492 3.47676 5
 3 3 3 21.7647 3.42224 2
 3 3 3 22.9466 3.90646 1
 -3 3 -3 26.1521 4.92383 5
 -5 -3 -3 277.195 10.9619 2
 5 -3 3 288.004 12.8399 6
 5 -3 3 271.082 12.2893 5
 -5 -3 -3 290.107 11.0335 3
 -5 3 -3 306.489 12.5907 5
 -5 3 -3 297.939 11.097 4
 5 3 3 282.049 10.9568 2
 5 3 3 297.38 12.0169 1
 -7 -3 -3 67.609 4.32707 3
 7 -3 3 80.4472 3.8214 2
 -7 -3 -3 72.2502 5.22768 2
 7 -3 3 76.2313 6.15257 5
 7 -3 3 80.2836 3.72175 2
 7 -3 3 80.5174 6.08864 6
 -7 3 -3 69.6924 6.46355 5
 -7 3 -3 81.0374 5.10545 4
 7 3 3 82.3659 5.24845 2
 9 -3 3 63.7976 3.74025 2
 9 -3 3 68.4585 4.04501 2
 -9 -3 -3 61.4531 5.19558 2
 9 -3 3 74.5762 5.93531 5
 -9 3 -3 65.5369 5.11239 4
 9 3 3 64.3801 5.34673 2
 -9 3 -3 62.3389 5.8396 5
 11 -3 3 60.747 4.25244 2
 -11 -3 -3 60.9119 5.72343 2
 11 -3 3 57.6045 4.03192 2
 -11 3 -3 56.7064 6.76876 5
 11 3 3 56.018 5.48436 2
 -11 3 -3 58.2118 5.37961 4
 13 -3 3 38.5539 4.49362 2
 -13 -3 -3 36.3775 5.77107 2
 13 -3 3 36.9536 4.18772 2
 -13 3 -3 53.9627 7.68029 5
 -13 3 -3 35.3323 5.68172 4
 13 3 3 38.4409 5.65159 2
 -15 -3 -3 39.6679 6.35344 2
 15 -3 3 50.6158 4.9308 2
 15 -3 3 48.4222 5.24448 2
 15 3 3 45.7925 6.28449 2
 -15 3 -3 39.0398 6.91234 4
 -15 3 -3 53.405 8.47242 5
 17 -3 3 168.614 8.40724 2
 17 -3 3 157.195 8.6806 2
 -17 -3 -3 166.104 9.78386 2
 -17 3 -3 190.271 11.5823 5
 -17 3 -3 159.703 9.89178 4
 17 3 3 177.69 9.34626 2
 19 -3 3 -6.8503 3.35452 2
 19 -3 3 -3.37 3.96017 2
 -19 3 -3 -3.7605 4.42089 4
 19 3 3 -2.7865 3.75295 2
 21 -3 3 9.60439 4.74476 2
 21 -3 3 9.9152 4.24872 2
 21 3 3 7.87079 4.36309 2
 23 -3 3 23.9463 6.01739 2
 23 3 3 22.146 5.15974 2
 26 -4 -3 8.44728 6.09368 2
 26 -4 -3 6.21777 5.58744 2
 26 4 -3 1.91395 4.31685 2
 24 -4 -3 6.017 7.24872 6
 24 -4 -3 11.8353 4.90575 2
 24 -4 -3 6.70451 5.39366 2
 24 4 -3 5.33433 4.35254 2
 24 4 -3 6.33015 5.00359 3
 22 -4 -3 48.918 7.28525 2
 22 -4 -3 45.0926 9.15008 6
 22 -4 -3 54.1824 7.43098 2
 -22 4 3 37.9591 6.43731 4
 22 4 -3 47.3341 6.1298 2
 22 4 -3 50.4205 7.35886 3
 20 -4 -3 266.375 15.0041 6
 20 -4 -3 259.97 12.2036 2
 20 -4 -3 275.641 12.5399 2
 -20 4 3 272.511 12.2742 2
 20 4 -3 289.816 13.5136 2
 -20 4 3 300.201 15.1872 5
 20 4 -3 274.082 12.3372 3
 -20 4 3 288.63 13.5242 4
 18 -4 -3 93.2145 7.669 2
 18 -4 -3 134.587 9.78153 6
 -18 4 3 117.572 8.14672 4
 -18 4 3 103.385 9.24272 5
 18 4 -3 121.366 8.2228 2
 18 4 -3 116.819 7.56693 3
 -18 4 3 122.354 7.6903 2
 16 -4 -3 140.954 9.22229 6
 16 -4 -3 124.583 7.29269 2
 16 4 -3 127.839 7.4503 3
 16 4 -3 132.702 8.11425 2
 -16 4 3 128.252 7.7063 4
 -16 4 3 125.063 9.50728 5
 16 4 -3 135.256 7.6729 2
 -16 4 3 139.693 7.39918 2
 14 -4 -3 93.4388 7.68023 6
 -14 4 3 99.1478 6.36955 4
 14 4 -3 92.6743 6.27215 2
 14 4 -3 98.4194 6.40604 3
 -14 4 3 88.9961 5.70349 2
 14 4 -3 89.9625 6.9847 2
 -14 4 3 83.9154 7.67565 5
 12 -4 -3 62.7932 4.3756 2
 12 -4 -3 61.9574 6.44447 6
 -12 4 3 54.494 6.85132 5
 12 4 -3 62.3722 5.15624 2
 -12 4 3 59.9565 4.75586 2
 12 4 -3 78.4056 5.5279 3
 12 4 -3 59.8168 5.8449 2
 -12 4 3 75.8943 5.06922 4
 -10 -4 3 26.9088 4.28863 2
 10 -4 -3 30.6805 5.66091 6
 10 -4 -3 36.6148 3.39189 2
 -10 -4 3 36.4943 3.43255 5
 -10 4 3 34.3586 3.84376 2
 -10 4 3 33.2841 4.93714 5
 10 4 -3 41.3582 4.60031 3
 10 4 -3 30.1325 4.46067 2
 -10 4 3 38.6535 4.00858 4
 10 4 -3 38.2498 4.19308 2
 10 4 -3 40.3758 5.27823 1
 8 -4 -3 36.8912 5.4625 6
 -8 -4 3 25.3511 4.22177 3
 -8 -4 3 25.5769 3.57728 5
 -8 -4 3 27.8511 3.89926 2
 8 4 -3 28.6213 3.6483 2
 -8 4 3 33.1368 4.54713 5
 8 4 -3 26.9654 3.62212 2
 -8 4 3 19.7612 4.99449 6
 8 4 -3 31.5733 4.52759 6
 -8 4 3 27.646 3.61692 2
 8 4 -3 37.2443 4.9632 1
 8 4 -3 25.2815 4.36604 3
 -6 -4 3 25.5333 3.85347 5
 -6 -4 3 26.9764 3.43555 2
 6 -4 -3 30.8658 3.13072 2
 -6 -4 3 27.0426 4.39522 3
 6 4 -3 25.6098 4.50792 6
 -6 4 3 29.662 3.22657 2
 6 4 -3 23.0557 3.38606 2
 -6 4 3 30.7072 5.01498 5
 6 4 -3 29.8499 4.86033 1
 -4 -4 3 153.083 7.43068 3
 4 -4 -3 146.171 8.08024 1
 4 -4 -3 146.924 6.35932 2
 -4 -4 3 147.787 7.29513 5
 4 -4 -3 148.536 6.51632 4
 -4 -4 3 157.788 6.06348 2
 -4 4 3 141.346 8.67513 6
 -4 4 3 154.499 7.83225 5
 4 4 -3 165.06 7.98358 1
 -4 4 3 157.51 6.35329 2
 4 4 -3 143.061 8.34042 6
 2 -4 -3 613.637 23.5505 1
 2 -4 -3 577.573 20.8333 2
 -2 -4 3 614.056 22.0465 3
 -2 -4 3 585.747 23.0417 5
 -2 -4 3 597.846 20.2636 2
 -2 -4 3 613.479 23.6114 1
 2 4 -3 591.346 24.3682 6
 -2 4 3 639.815 24.8249 6
 -2 4 3 580.804 22.9019 5
 -2 4 3 599.155 20.8348 2
 0 -4 3 144.335 7.50001 6
 0 -4 3 127.649 6.47628 4
 0 -4 3 115.253 6.5612 3
 0 -4 3 111.598 7.37953 1
 0 -4 3 120.135 6.97859 5
 0 -4 -3 132.918 5.9529 2
 0 -4 -3 103.259 7.29172 1
 0 4 3 134.921 5.89464 2
 0 4 -3 128.723 7.69648 6
 0 4 3 126.242 6.22128 5
 2 -4 3 83.4174 5.78364 4
 -2 -4 -3 91.0961 5.45374 3
 2 -4 3 69.4474 5.51368 3
 2 -4 3 101.221 6.61277 6
 -2 -4 -3 102.942 5.33125 2
 2 -4 3 82.2976 6.30006 5
 2 4 3 84.6261 5.91044 1
 2 4 3 81.4544 4.77889 5
 2 4 3 101.952 5.3325 2
 -4 -4 -3 472.407 17.634 3
 4 -4 3 478.713 19.9227 6
 4 -4 3 500.544 19.0497 5
 4 -4 3 440.115 18.9961 1
 -4 -4 -3 478.178 17.03 2
 4 -4 3 468.599 17.3647 4
 4 4 3 472.333 17.0661 2
 4 4 3 473.279 18.81 1
 -4 4 -3 497.845 19.138 5
 4 4 3 435.276 17.6625 5
 -6 -4 -3 449.432 17.4895 3
 -6 -4 -3 472.936 17.3427 2
 6 -4 3 482.9 20.1509 6
 6 -4 3 481.478 19.0415 5
 6 4 3 463.067 17.16 2
 6 4 3 470.729 18.8644 1
 -6 4 -3 442.839 17.1842 4
 -6 4 -3 491.576 19.3032 5
 -8 -4 -3 72.1698 5.27533 3
 -8 -4 -3 86.3953 5.97935 2
 8 -4 3 87.1826 4.00711 2
 8 -4 3 80.1443 7.14119 6
 -8 4 -3 72.8645 5.9728 4
 8 4 3 78.689 6.38407 1
 8 4 3 90.3726 5.93989 2
 -8 4 -3 86.0253 7.33405 5
 10 -4 3 73.8765 7.80999 6
 10 -4 3 83.1342 4.46362 2
 -10 -4 -3 82.8872 6.682 2
 -10 4 -3 80.6627 6.34321 4
 -10 4 -3 84.842 8.09735 5
 10 4 3 76.8914 6.53221 1
 -12 -4 -3 3.03378 4.0352 2
 12 -4 3 -3.8507 4.872 6
 12 -4 3 3.5695 2.51803 2
 -12 4 -3 7.10582 5.6468 5
 -12 4 -3 5.23244 3.57938 4
 14 -4 3 4.64616 5.64428 6
 14 -4 3 5.7367 3.56369 2
 -14 -4 -3 13.2428 4.5746 2
 -14 4 -3 5.47286 4.16 4
 -14 4 -3 13.9112 6.59843 5
 -16 -4 -3 6.77873 4.40577 2
 16 -4 3 8.55274 3.37479 2
 16 -4 3 2.42563 5.82569 6
 -16 4 -3 13.7538 6.89787 5
 -16 4 -3 14.599 4.26515 4
 -18 -4 -3 6.04538 4.63737 2
 18 4 3 7.91027 4.21097 2
 -18 4 -3 9.095 4.52627 4
 20 -4 3 -6.1371 4.88054 2
 20 -4 3 -3.5807 4.29916 2
 20 4 3 -5.9795 4.35978 2
 -20 4 -3 -5.3739 4.97408 4
 22 -4 3 27.9131 6.31085 2
 25 -5 -3 2.02839 9.32829 6
 -25 5 3 5.96207 7.18697 4
 25 5 -3 -8.1358 4.92414 2
 25 5 -3 0.88947 6.17915 3
 -23 5 3 -6.0125 5.88831 4
 21 -5 -3 -1.3292 4.52573 2
 -21 5 3 3.2665 5.58106 4
 -21 5 3 7.05178 6.83696 5
 21 5 -3 -2.3455 4.97311 2
 19 -5 -3 82.2437 9.98676 6
 19 5 -3 68.8899 7.64238 3
 -19 5 3 55.6036 7.38145 2
 19 5 -3 71.8382 8.30997 2
 -19 5 3 54.1173 8.16462 4
 17 -5 -3 39.1136 7.98916 6
 -17 5 3 27.4453 4.79548 2
 17 5 -3 27.0451 5.1929 3
 -17 5 3 25.0459 4.87398 4
 15 -5 -3 7.38581 6.23408 6
 -15 5 3 11.6292 4.20664 4
 -15 5 3 6.03426 5.72108 5
 15 5 -3 10.3715 4.20251 2
 -15 5 3 6.97478 4.02447 2
 15 5 -3 10.8846 5.4152 1
 15 5 -3 14.9558 4.45904 3
 13 -5 -3 48.2822 7.79391 6
 -13 5 3 49.6024 5.30398 2
 13 5 -3 41.6009 6.7685 1
 13 5 -3 50.0808 6.29777 2
 -13 5 3 55.5911 6.0921 4
 -13 5 3 49.8351 6.53955 5
 11 -5 -3 29.2415 5.88555 6
 -11 -5 3 17.7629 4.00078 2
 -11 5 3 20.8949 5.32555 5
 11 5 -3 30.3129 5.03041 2
 -11 5 3 17.1031 3.47316 2
 -9 -5 3 6.62241 3.22858 2
 -9 -5 3 3.70614 3.64059 3
 9 5 -3 0.58211 4.68968 6
 9 5 -3 9.07085 3.04708 2
 9 5 -3 8.0758 4.52533 1
 -9 5 3 -0.4938 4.53317 5
 -9 5 3 1.96549 5.29012 6
 -7 -5 3 5.46292 2.83332 2
 7 -5 -3 10.8094 4.30609 1
 7 -5 -3 3.52399 2.50173 2
 -7 -5 3 -0.0345 3.60414 3
 7 5 -3 5.56959 4.71401 6
 -7 5 3 -4.014 4.74291 6
 -7 5 3 2.39396 2.59231 2
 -7 5 3 2.12472 4.05727 5
 5 -5 -3 7.82264 2.58297 2
 -5 -5 3 11.6161 2.62769 2
 5 -5 -3 7.96781 3.00931 4
 -5 -5 3 10.8744 3.61653 3
 5 -5 -3 9.78023 4.4353 1
 5 5 -3 7.90185 3.71342 1
 -5 5 3 10.423 4.02103 5
 5 5 -3 8.23281 4.82193 6
 -5 5 3 9.03329 2.55921 2
 3 -5 -3 47.7503 4.58224 2
 3 -5 -3 38.5442 4.72238 4
 -3 -5 3 34.2998 5.9532 1
 -3 -5 3 50.0187 5.38135 5
 3 -5 -3 38.3853 5.98764 1
 -3 -5 3 46.8475 3.63801 2
 -3 -5 3 40.4825 5.26113 3
 3 5 -3 33.4577 6.05004 6
 -3 5 3 32.524 5.24544 5
 -3 5 3 39.0549 6.11223 6
 -3 5 3 39.442 3.86677 2
 -1 -5 3 -0.435 3.16051 4
 -1 -5 3 7.34184 3.90102 5
 -1 -5 3 3.33373 3.48542 3
 -1 -5 3 1.00275 4.40832 1
 1 -5 -3 8.55123 4.45419 1
 -1 5 3 -1.1892 3.27497 5
 -1 5 3 8.4091 5.18661 6
 1 5 -3 1.34556 4.43749 6
 1 -5 3 -5.7603 3.42705 3
 -1 -5 -3 -1.9556 3.39173 3
 -1 -5 -3 7.27459 2.86426 2
 1 -5 3 1.13243 3.99636 5
 1 -5 3 -1.0495 4.62031 6
 -1 -5 -3 0.6505 4.13653 1
 1 -5 3 -5.7108 4.51772 1
 -1 5 -3 6.01934 4.8457 6
 1 5 3 -3.0419 2.82448 5
 1 5 3 -1.1524 4.77072 6
 3 -5 3 -5.41 4.09841 1
 3 -5 3 -1.3566 3.55188 3
 3 -5 3 3.11981 3.45792 4
 3 -5 3 4.6467 4.71747 6
 -3 -5 -3 11.0161 3.16393 2
 3 5 3 4.43312 3.98337 1
 3 5 3 3.43043 2.61311 5
 3 5 3 10.3666 3.04842 2
 -5 -5 -3 20.4248 4.11096 3
 5 -5 3 26.0429 4.91762 1
 5 -5 3 22.7419 4.22009 3
 5 -5 3 36.6791 6.47847 6
 5 5 3 35.0274 5.58755 1
 -7 -5 -3 14.6511 4.0196 2
 -7 -5 -3 5.63467 4.00295 3
 7 -5 3 14.0934 4.79446 1
 7 -5 3 9.44058 5.33898 6
 7 5 3 18.6496 4.91219 1
 -9 -5 -3 30.1671 4.77634 2
 -9 -5 -3 24.8393 4.4845 3
 9 -5 3 45.9886 8.34711 6
 -11 -5 -3 11.1583 4.62838 2
 -11 5 -3 3.86138 4.05249 4
 13 -5 3 2.96276 5.94115 6
 -13 -5 -3 0.36912 4.58778 2
 13 -5 3 2.20108 2.83571 2
 -13 5 -3 3.00419 7.25968 5
 13 5 3 -2.2186 4.99294 1
 13 5 3 8.45603 4.28043 2
 -13 5 -3 -2.0714 4.31563 4
 15 -5 3 3.84605 6.98814 6
 -15 -5 -3 -1.5419 4.73282 2
 15 -5 3 4.97366 3.5401 2
 -15 5 -3 3.26937 4.82064 4
 15 5 3 3.27474 5.48641 1
 -17 -5 -3 16.6745 5.54824 2
 17 -5 3 18.0205 7.10281 6
 -17 5 -3 19.4099 5.52237 4
 19 -5 3 7.94049 7.28099 6
 -19 -5 -3 11.3359 5.97744 2
 19 -5 3 -2.158 4.40396 2
 -19 5 -3 7.80106 5.95321 4
 19 5 3 12.3618 4.96765 2
 21 5 3 16.2379 5.49938 2
 22 6 -3 -0.098 6.59758 1
 -22 6 3 3.55508 7.52134 4
 22 6 -3 -2.9889 6.75593 2
 20 -6 -3 53.9935 11.2578 6
 20 6 -3 54.0788 9.71352 2
 20 6 -3 78.4088 8.80338 1
 -20 6 3 67.6893 10.686 4
 -20 6 3 59.2477 7.8394 2
 18 6 -3 80.1837 8.51398 1
 -18 6 3 70.8734 9.71562 4
 18 6 -3 83.2822 8.90313 2
 16 -6 -3 55.141 9.67632 6
 16 6 -3 36.4757 6.62133 1
 16 6 -3 41.2762 6.34074 2
 -16 6 3 34.6895 6.2859 2
 -16 6 3 51.2058 9.52905 5
 14 -6 -3 46.315 8.80981 6
 14 6 -3 47.1294 7.88875 2
 14 6 -3 51.362 9.19886 6
 14 6 -3 47.2238 7.13437 1
 -12 6 3 6.56654 4.07455 2
 12 6 -3 15.3477 5.53796 1
 12 6 -3 9.49547 7.22028 6
 12 6 -3 10.733 4.47139 2
 -12 6 3 19.6694 6.19008 5
 10 -6 -3 9.27583 5.00521 1
 -10 -6 3 -1.7348 4.48043 3
 10 6 -3 10.2416 4.17776 2
 10 6 -3 13.863 6.72623 6
 -10 6 3 12.7381 5.93147 5
 10 6 -3 14.631 5.40883 1
 -10 6 3 8.83844 3.80628 2
 -8 -6 3 1.32044 4.50282 3
 8 -6 -3 10.9476 4.90477 1
 8 6 -3 5.02899 3.6093 2
 8 6 -3 5.03769 4.67693 1
 -8 6 3 3.88062 3.62065 2
 8 6 -3 -5.6539 6.14759 6
 -8 6 3 -1.2393 5.08042 5
 -6 -6 3 17.275 4.74104 3
 6 -6 -3 9.94372 3.44177 2
 6 -6 -3 8.42578 4.25056 4
 6 -6 -3 9.39362 4.9914 1
 -6 6 3 17.6421 5.39373 5
 6 6 -3 15.4982 3.53491 2
 6 6 -3 17.5169 5.0484 1
 6 6 -3 0.07313 6.60109 6
 -6 6 3 13.8167 3.47938 2
 -6 6 3 -2.1583 6.36931 6
 -4 -6 3 131.118 8.45205 3
 4 -6 -3 127.921 8.07689 4
 4 -6 -3 132.934 9.04412 1
 4 -6 -3 133.611 7.21475 2
 4 6 -3 126.622 9.71526 6
 -4 6 3 138.628 8.63811 5
 -4 6 3 119.06 10.6293 6
 2 -6 -3 133.952 8.22248 3
 -2 -6 3 125.828 8.58083 3
 -2 -6 3 136.629 8.4218 4
 2 -6 -3 131.859 8.92775 1
 2 -6 -3 142.694 7.42047 2
 2 -6 -3 120.372 7.60059 4
 -2 -6 3 126.72 9.08467 1
 -2 6 3 114.26 8.33674 5
 2 6 -3 125.34 9.90768 6
 -2 6 3 132.106 10.4513 6
 0 -6 -3 58.5629 6.9272 3
 0 -6 3 63.0183 7.2395 4
 0 -6 3 66.8118 7.39363 1
 0 -6 -3 76.9299 7.62142 1
 0 -6 3 77.03 6.8698 3
 0 6 -3 87.8976 8.48449 6
 0 6 3 67.3293 6.39571 5
 0 6 3 75.757 8.85357 6
 2 -6 3 61.0082 7.36513 1
 2 -6 3 73.4944 7.53872 4
 2 -6 3 63.9294 6.85832 3
 -2 -6 -3 50.65 6.82603 3
 2 6 3 78.43 6.17589 5
 2 6 3 78.4589 8.34833 6
 4 -6 3 170.494 9.60896 4
 4 -6 3 160.091 10.8821 6
 4 -6 3 137.442 9.37969 3
 -4 -6 -3 184.726 9.11385 2
 -4 -6 -3 147.152 9.00921 3
 4 -6 3 150.549 9.80795 1
 4 6 3 158.929 9.25413 1
 6 -6 3 170.757 9.95312 3
 6 -6 3 186.479 12.0224 6
 6 -6 3 186.167 10.5065 1
 -6 -6 -3 201.809 9.98239 2
 -6 -6 -3 165.894 9.75456 3
 6 6 3 165.653 10.1612 1
 8 -6 3 76.1681 7.57834 1
 8 -6 3 61.2439 7.15914 3
 -8 -6 -3 54.3085 7.2095 3
 -8 -6 -3 81.9353 8.70613 2
 8 -6 3 56.5964 9.18731 6
 8 6 3 67.9504 7.77848 1
 10 -6 3 71.4957 9.7308 6
 10 -6 3 69.1746 7.60813 3
 10 -6 3 72.8211 7.96625 1
 -10 -6 -3 64.0813 8.15435 2
 10 6 3 65.1273 7.56948 1
 12 -6 3 27.8749 7.66126 6
 -12 -6 -3 28.4106 6.1323 2
 12 6 3 27.7156 6.37398 1
 14 -6 3 8.09206 7.94239 6
 -14 -6 -3 6.61229 6.09517 2
 14 6 3 19.846 6.40091 1
 -16 -6 -3 -0.3963 6.67788 2
 16 6 3 14.6272 6.85827 1
 -16 6 -3 11.4899 6.308 4
 -18 -6 -3 6.21224 6.50239 2
 -18 6 -3 13.1525 7.06895 4
 18 6 3 15.5942 7.61894 1
 18 6 3 15.8061 5.68042 2
 -17 7 3 1.18671 5.38144 2
 17 7 -3 -5.6724 6.26435 1
 15 -7 -3 8.58002 6.02806 1
 -15 7 3 3.55529 4.66962 2
 15 7 -3 6.39192 9.21512 6
 15 7 -3 -4.9636 6.32865 2
 15 7 -3 -4.18 5.44871 1
 13 -7 -3 13.5292 5.92067 1
 13 7 -3 4.81722 5.65858 2
 13 7 -3 -3.6732 5.56138 1
 11 -7 -3 12.569 5.44281 1
 11 7 -3 2.48918 5.25765 1
 11 7 -3 7.71743 8.53729 6
 11 7 -3 6.02547 5.7167 2
 -11 7 3 1.90416 4.54621 2
 -9 -7 3 9.46259 4.99842 3
 9 -7 -3 15.321 6.15036 1
 9 7 -3 12.3221 5.15638 2
 9 7 -3 11.77 5.44949 1
 9 7 -3 18.846 8.2067 6
 -9 7 3 18.1811 7.48129 6
 -9 7 3 20.1474 7.02705 5
 7 -7 -3 10.6043 5.99855 1
 -7 -7 3 5.74405 5.24604 3
 -7 7 3 3.40921 7.36252 6
 -7 7 3 13.4025 6.74231 5
 7 7 -3 14.2701 5.08701 1
 7 7 -3 11.0101 7.43659 6
 7 7 -3 6.09783 4.65619 2
 5 -7 -3 7.74012 4.98506 4
 5 -7 -3 9.34446 4.43876 2
 5 -7 -3 -1.115 5.11593 1
 -5 -7 3 5.00817 4.76666 3
 5 -7 -3 11.2977 5.13605 3
 5 7 -3 10.1001 6.89542 6
 -5 7 3 -2.0619 6.77703 6
 -5 7 3 9.05498 6.21713 5
 5 7 -3 2.38484 4.10132 2
 3 -7 -3 4.26256 4.86573 3
 -3 -7 3 -5.7942 4.97092 4
 3 -7 -3 -2.6802 4.83697 4
 3 -7 -3 7.30456 4.58012 2
 -3 -7 3 -6.3696 4.84705 3
 3 -7 -3 -2.2358 5.5567 1
 -3 7 3 -3.293 7.04771 6
 3 7 -3 -11.782 7.02511 6
 -3 7 3 -2.0578 6.01963 5
 3 7 -3 2.36011 3.57163 2
 -1 -7 3 1.40483 4.9512 3
 1 -7 -3 5.77358 5.12555 4
 -1 -7 3 4.25094 5.47072 4
 -1 -7 3 19.398 6.4848 1
 1 -7 -3 7.30649 4.81967 3
 1 7 -3 16.0343 7.52927 6
 -1 7 3 4.51038 5.70902 5
 1 -7 3 15.1921 5.94003 1
 -1 -7 -3 10.525 5.08238 3
 1 -7 3 20.6496 5.7192 4
 1 -7 3 12.3961 5.15233 3
 -1 -7 -3 28.9488 5.90333 2
 1 7 3 23.719 7.7974 6
 3 -7 3 20.7106 5.63939 4
 -3 -7 -3 17.8006 5.50254 2
 3 7 3 25.5965 7.78421 6
 5 -7 3 10.1517 6.04256 1
 5 -7 3 8.83834 5.40199 3
 -5 -7 -3 0.44438 5.34692 3
 5 -7 3 14.7262 6.06357 4
 5 7 3 11.6537 7.99743 6
 7 -7 3 2.6908 5.13823 3
 -7 -7 -3 3.74513 5.96096 3
 -7 -7 -3 18.3866 6.76173 2
 7 -7 3 25.5663 7.85389 6
 7 -7 3 7.02016 5.52467 1
 7 7 3 9.7551 5.46196 1
 -9 -7 -3 11.5737 6.16333 3
 -9 -7 -3 22.2915 7.34417 2
 9 -7 3 18.6544 5.98091 3
 9 -7 3 32.7576 8.07189 6
 9 -7 3 25.9228 6.09086 1
 9 7 3 11.2537 5.98723 1
 11 -7 3 7.96963 5.94995 3
 -11 -7 -3 1.40802 6.88473 2
 11 -7 3 -4.0217 8.15688 6
 11 7 3 -0.4195 6.28541 1
 -13 -7 -3 2.69645 7.41682 2
 13 -7 3 4.02918 6.92022 3
 13 -7 3 17.0172 6.93108 1
 13 7 3 11.9642 7.04626 1
 12 -8 -3 11.2784 6.23469 1
 12 8 -3 30.5588 12.3347 6
 12 8 -3 8.21033 6.08707 1
 10 -8 -3 13.8329 6.21208 3
 -10 -8 3 8.25828 5.98966 3
 10 -8 -3 6.19631 6.11258 1
 10 8 -3 12.5914 5.6592 1
 10 8 -3 -3.8422 10.8307 6
 -8 -8 3 4.60836 5.97496 3
 8 -8 -3 10.7317 5.76614 3
 8 -8 -3 4.01368 6.38973 1
 -8 8 3 12.8596 8.89357 6
 6 -8 -3 15.5458 5.60328 3
 -6 -8 3 5.488 5.65955 3
 6 -8 -3 0.64205 5.66931 1
 6 8 -3 13.7031 9.40294 6
 -6 8 3 3.81102 7.5515 6
 -4 -8 3 12.8343 5.8564 3
 4 -8 -3 12.701 5.88906 3
 4 -8 -3 10.3541 6.94373 4
 -4 -8 3 -2.7213 6.52661 4
 4 -8 -3 18.481 6.37759 1
 -4 8 3 -0.1453 7.85059 6
 2 -8 -3 34.1443 6.4303 3
 2 -8 -3 47.7069 8.60287 1
 -2 -8 3 45.8297 8.23625 3
 -2 -8 3 23.7996 7.67599 4
 2 -8 -3 36.2083 7.47049 4
 -2 8 3 47.7096 8.9795 6
 0 -8 3 17.1752 5.76965 3
 0 -8 -3 15.0305 7.20093 4
 0 -8 3 28.3559 6.88019 1
 0 -8 3 18.4895 7.50048 4
 0 -8 -3 20.6308 5.80748 3
 0 8 3 22.7913 9.65442 6
 2 -8 3 7.51541 5.41842 3
 2 -8 3 2.87114 7.13448 4
 2 -8 3 9.41444 6.34985 1
 -2 -8 -3 3.14014 5.75878 3
 -2 -8 -3 -1.4002 7.00609 4
 -4 -8 -3 60.144 9.48551 3
 4 -8 3 67.3203 12.1193 4
 4 -8 3 42.9104 8.09673 1
 4 -8 3 67.7145 7.65265 3
 4 8 3 55.9413 11.3045 6
 6 -8 3 70.6392 8.95471 3
 -6 -8 -3 63.4815 10.0172 3
 6 -8 3 67.6986 7.91175 1
 -8 -8 -3 21.6938 7.93395 3
 8 -8 3 37.659 7.00322 1
 -8 -8 -3 34.751 8.71599 2
 8 -8 3 20.2802 6.80631 3
 8 8 3 32.9046 10.8485 6
 -30 0 4 44.0123 8.16649 5
 30 0 -4 59.1234 7.70117 2
 28 0 -4 165.793 9.88493 2
 28 0 -4 174.28 9.99528 2
 -28 0 4 152.656 10.6275 5
 26 0 -4 181.099 9.66881 2
 -26 0 4 184.122 10.769 5
 26 0 -4 202.811 10.3388 2
 24 0 -4 38.5774 5.82061 2
 -24 0 4 60.7838 7.09062 5
 24 0 -4 49.183 5.19799 2
 22 0 -4 46.5437 5.63283 2
 22 0 -4 50.8581 5.7911 2
 20 0 -4 76.4569 5.67693 2
 -20 0 4 79.0114 6.51411 5
 20 0 -4 76.5006 5.69054 2
 18 0 -4 14.815 2.75769 2
 18 0 -4 13.717 2.8406 2
 16 0 -4 91.0486 5.19951 2
 16 0 -4 95.1172 5.2329 2
 -16 0 4 84.9196 5.33919 2
 -12 0 4 71.7622 4.31769 2
 12 0 -4 76.3354 4.16441 2
 -10 0 4 298.063 10.7229 2
 10 0 -4 295.665 10.6799 2
 8 0 -4 29.2706 2.82766 2
 -8 0 4 26.6757 2.84651 2
 -6 0 4 248.622 8.75888 2
 6 0 -4 237.15 8.72575 2
 4 0 -4 131.209 4.97464 2
 -4 0 4 134.479 4.97326 2
 -2 0 4 405.93 13.9067 2
 2 0 -4 402.158 13.9214 2
 -2 0 4 416.174 13.9462 4
 0 0 -4 213.832 7.56654 2
 0 0 4 209.401 7.52296 2
 0 0 -4 207.342 7.57977 4
 -2 0 -4 531.239 18.0483 2
 2 0 4 528.308 18.0443 2
 4 0 4 11.76 1.93342 2
 -4 0 -4 11.3676 1.80022 2
 6 0 4 154.924 6.47091 2
 -6 0 -4 157.588 6.48484 2
 6 0 4 161.477 6.89103 5
 8 0 4 51.4343 4.24435 2
 -8 0 -4 60.6309 4.22815 2
 -10 0 -4 25.8713 3.19987 2
 10 0 4 28.1881 3.65725 5
 10 0 4 35.3607 3.41449 2
 12 0 4 46.9992 4.53688 2
 12 0 4 47.9816 4.49404 5
 -12 0 -4 45.5329 4.64734 2
 14 0 4 291.262 11.8081 2
 14 0 4 285.591 11.7171 2
 -14 0 -4 298.588 12.0757 2
 16 0 4 1671.08 58.2983 2
 16 0 4 1757.36 58.432 2
 18 0 4 114.878 7.79299 2
 18 0 4 118.351 8.16666 2
 20 0 4 129.152 8.58795 2
 20 0 4 142.213 8.70347 2
 22 0 4 61.8636 6.32872 2
 22 0 4 46.4533 7.19145 2
 24 0 4 -0.0419 4.55668 2
 31 -1 -4 6.34129 5.65658 2
 31 -1 -4 -1.2168 5.13378 2
 31 1 -4 6.04564 5.24472 2
 29 -1 -4 12.1117 4.73603 2
 -29 1 4 0.29804 6.94255 5
 29 1 -4 9.54465 4.30002 2
 27 -1 -4 2.06167 3.94775 2
 27 -1 -4 10.6361 4.27533 2
 27 1 -4 7.03967 4.09918 2
 -27 1 4 2.47116 6.24258 5
 -25 -1 4 7.08992 4.61071 5
 25 -1 -4 4.29904 3.75344 2
 25 -1 -4 10.9411 4.02003 2
 25 1 -4 2.90212 3.73403 2
 -25 1 4 5.92735 5.51258 5
 25 1 -4 6.92611 3.58798 2
 -23 -1 4 9.88234 4.71519 5
 23 -1 -4 7.47557 3.77958 2
 23 -1 -4 11.4766 3.6993 2
 23 1 -4 8.34834 3.78948 2
 -23 1 4 9.96232 5.17353 5
 23 1 -4 10.374 3.66364 2
 21 -1 -4 2.0163 3.10142 2
 -21 -1 4 0.70419 3.85782 5
 21 -1 -4 -2.08 2.95737 2
 -21 1 4 -2.6838 4.59026 5
 21 1 -4 -4.229 3.07108 2
 21 1 -4 -4.0903 3.09454 2
 19 -1 -4 -0.4285 2.55009 2
 19 -1 -4 -0.0336 2.64924 2
 19 1 -4 0.64146 2.6699 2
 19 1 -4 0.27527 2.6212 2
 -19 1 4 0.33907 4.09353 5
 -19 1 4 0.68437 3.0836 2
 17 -1 -4 53.1923 4.40112 2
 17 1 -4 51.8296 4.55895 2
 -17 1 4 58.2693 4.95908 2
 17 1 -4 55.9132 4.82425 2
 15 -1 -4 76.7078 4.6829 2
 15 1 -4 81.4893 4.78015 2
 15 1 -4 69.9098 5.0075 2
 -15 1 4 74.5645 5.13813 2
 13 -1 -4 171.59 7.08045 2
 -13 -1 4 166.925 7.17156 2
 -13 1 4 168.891 7.27563 2
 13 1 -4 171.502 7.11292 2
 13 1 -4 168.381 7.24992 2
 11 -1 -4 452.908 15.6231 2
 11 -1 -4 435.378 17.5676 6
 -11 -1 4 439.531 15.6025 2
 11 1 -4 431.148 15.5539 2
 11 1 -4 459.864 15.6709 2
 -11 1 4 454.7 15.6685 2
 9 -1 -4 269.208 9.71649 2
 -9 -1 4 262.689 9.68486 2
 9 -1 -4 264.615 10.863 6
 -9 1 4 269.501 9.76627 2
 9 1 -4 272.842 9.7146 2
 -7 -1 4 13.4124 1.75599 2
 7 -1 -4 12.6542 1.7718 2
 7 1 -4 15.1719 1.76372 2
 -7 1 4 14.0458 2.13622 6
 -7 1 4 16.2358 2.60721 2
 -5 -1 4 108.475 4.4695 2
 -5 -1 4 104.665 4.75499 6
 5 -1 -4 114.733 4.67163 2
 5 1 -4 112.782 4.54958 2
 -5 1 4 114.838 4.74518 2
 5 1 -4 113.78 4.83777 6
 -3 -1 4 19.0933 1.81504 2
 3 -1 -4 21.0253 2.3392 2
 3 1 -4 17.3079 1.76997 2
 -3 1 4 19.068 2.37893 2
 3 1 -4 18.3153 2.39607 3
 3 1 -4 13.5057 2.50617 1
 -1 -1 4 160.696 6.10927 2
 1 -1 -4 170.104 6.85736 1
 -1 -1 4 175.964 6.85428 4
 -1 -1 4 179.823 7.17307 1
 -1 -1 4 181.266 6.74215 3
 1 -1 -4 178.325 6.69771 2
 1 1 -4 180.384 6.67222 3
 -1 1 4 179.371 6.61151 2
 -1 1 4 181.886 6.85578 1
 1 1 -4 159.102 6.12058 2
 -1 -1 -4 115.04 4.94153 2
 1 -1 4 118.15 4.71744 3
 1 -1 4 111.631 5.03399 4
 1 -1 4 108.831 4.28224 2
 -1 1 -4 108.197 4.28904 2
 -1 1 -4 116.173 4.92809 4
 1 1 4 116.176 4.90498 2
 -3 -1 -4 0.25042 0.90839 3
 -3 -1 -4 0.64098 1.71116 2
 3 -1 4 0.493 2.01427 5
 -3 1 -4 -1.0237 1.29577 2
 3 1 4 -2.753 1.67889 2
 -3 1 -4 -0.6556 1.74168 4
 -5 -1 -4 53.4629 3.63287 2
 5 -1 4 48.8038 3.26133 2
 5 -1 4 52.9005 4.05326 5
 5 1 4 53.0733 3.689 2
 -5 1 -4 52.6119 3.19736 2
 -7 -1 -4 -0.9805 2.09572 2
 7 -1 4 2.61758 2.39151 5
 7 1 4 2.92409 1.74292 5
 7 1 4 -3.6906 2.21122 2
 9 -1 4 -3.1041 1.88391 2
 9 -1 4 -1.1875 2.64391 5
 9 1 4 -1.9205 1.86809 5
 11 -1 4 51.7097 4.8809 5
 11 -1 4 59.3258 4.24373 2
 -11 -1 -4 53.4727 4.92979 2
 11 -1 4 49.801 4.20714 2
 11 1 4 53.3937 4.77044 2
 -13 -1 -4 94.5529 6.30118 2
 13 -1 4 96.3896 5.70337 2
 13 -1 4 99.2129 5.76788 2
 13 1 4 101.982 6.33435 2
 13 1 4 98.2811 4.32158 3
 -15 -1 -4 108.726 7.02333 2
 15 -1 4 94.5108 6.4104 2
 15 1 4 114.812 7.09606 2
 15 1 4 95.5534 6.65802 2
 17 -1 4 81.1616 6.85133 2
 -17 -1 -4 117.886 7.96534 2
 17 -1 4 96.7162 6.90142 2
 17 1 4 111.426 7.61248 2
 17 1 4 112.873 7.95509 2
 19 -1 4 1.77794 3.23625 2
 19 -1 4 1.91696 3.56577 2
 19 1 4 -3.2968 3.32998 2
 21 -1 4 -2.2655 4.01493 2
 21 -1 4 1.24822 3.74127 2
 21 1 4 -6.7308 3.21443 2
 21 1 4 -1.5105 3.59841 2
 23 -1 4 4.65324 4.341 2
 23 1 4 -3.5759 3.43921 2
 23 1 4 -5.105 4.04582 2
 25 -1 4 -1.4965 5.23029 2
 30 -2 -4 29.5489 6.89413 2
 -30 2 4 32.5761 8.11383 5
 30 2 -4 22.7596 4.70215 2
 28 -2 -4 94.0113 9.69036 2
 -28 2 4 74.5791 10.0139 5
 28 2 -4 80.1403 8.47956 2
 26 -2 -4 61.3208 7.60143 2
 26 -2 -4 54.6507 7.2009 2
 -26 -2 4 58.2888 6.43005 5
 26 2 -4 52.5185 7.09671 2
 24 -2 -4 19.7863 4.1086 2
 -24 -2 4 19.8252 4.31104 5
 24 -2 -4 19.8848 4.39048 2
 24 2 -4 22.7942 4.36348 2
 24 2 -4 13.9794 4.06328 2
 -22 -2 4 68.6092 5.46452 5
 22 -2 -4 54.9134 5.34523 2
 22 -2 -4 56.7197 6.3924 2
 -22 2 4 48.8882 7.89392 5
 -22 2 4 46.778 6.61878 2
 22 2 -4 44.8842 6.42183 2
 22 2 -4 55.0529 5.28708 2
 -20 -2 4 65.5576 5.06289 5
 20 -2 -4 46.4358 5.76997 2
 20 -2 -4 39.0824 5.46129 2
 -20 2 4 59.9023 6.4382 5
 -20 2 4 61.4245 6.03592 2
 20 2 -4 43.3991 5.70029 2
 20 2 -4 49.7976 5.74453 2
 18 -2 -4 0.41952 3.34063 6
 18 -2 -4 -1.2272 2.61679 2
 18 2 -4 3.11854 2.87831 2
 18 2 -4 -0.6765 2.66153 2
 -18 2 4 2.74752 3.17995 2
 -18 2 4 -0.7046 4.24024 5
 16 -2 -4 1.76975 2.33238 2
 16 -2 -4 1.66742 3.16253 6
 16 2 -4 3.13636 2.55529 2
 16 2 -4 3.11911 2.61349 2
 -16 2 4 4.85589 2.93924 2
 -16 2 4 -4.3803 3.96268 5
 14 -2 -4 89.7372 5.04609 2
 14 -2 -4 95.6182 5.84315 6
 14 2 -4 101.471 5.49074 2
 14 2 -4 94.8667 5.5238 2
 -14 2 4 90.4248 5.39179 2
 12 -2 -4 194.699 7.95192 2
 12 -2 -4 203.423 9.14618 6
 12 2 -4 202.436 8.07571 2
 -12 2 4 195.047 8.04678 2
 12 2 -4 206.26 8.15961 2
 10 -2 -4 205.048 7.86728 2
 10 -2 -4 197.769 9.06859 6
 10 2 -4 198.541 7.89197 2
 10 2 -4 203.257 7.84156 2
 -10 2 4 199.603 7.86836 2
 10 2 -4 210.199 8.1318 3
 8 -2 -4 81.555 4.84 6
 8 -2 -4 86.2583 3.98066 2
 8 2 -4 73.5323 3.98407 2
 -8 2 4 71.9958 4.73158 6
 8 2 -4 77.4648 4.26582 3
 8 2 -4 74.6511 3.92677 2
 -8 2 4 81.8601 4.03214 2
 6 -2 -4 2.20325 1.48927 2
 6 2 -4 -1.0002 2.08829 6
 -6 2 4 1.48493 1.123 4
 6 2 -4 0.48075 1.38635 2
 -6 2 4 -1.3321 2.43841 6
 6 2 -4 0.97504 1.88772 3
 -6 2 4 3.60699 1.53242 2
 6 2 -4 -1.6221 1.39881 2
 4 -2 -4 399.443 13.7539 2
 -4 -2 4 388.369 15.6356 6
 -4 -2 4 395.256 14.3622 3
 4 2 -4 376.343 13.3768 2
 4 2 -4 391.627 15.2882 1
 4 2 -4 369.726 13.3655 2
 -4 2 4 399.733 13.7569 2
 4 2 -4 403.259 14.3218 3
 4 2 -4 421.165 15.6874 6
 -2 -2 4 4717.47 165.348 1
 2 -2 -4 4212.06 150.528 2
 2 -2 -4 4847.02 165.262 1
 -2 -2 4 4720.24 154.98 3
 -2 -2 4 4360.26 171.835 6
 2 2 -4 4567.1 154.949 3
 -2 2 4 4467.49 150.44 2
 2 2 -4 4417.85 165.27 1
 0 -2 4 384.265 13.3131 3
 0 -2 4 354.551 14.7765 6
 0 -2 4 359.887 14.2174 1
 0 -2 4 361.86 13.0634 4
 0 -2 -4 363.466 12.8886 2
 0 -2 4 350.668 14.1902 5
 0 2 4 362.844 12.9226 2
 0 2 4 379.13 14.0274 1
 2 -2 4 142.907 6.13946 4
 2 -2 4 132.886 6.6654 5
 2 -2 4 154.075 6.08673 3
 -2 -2 -4 138.531 6.02148 2
 2 2 4 144.895 6.28151 1
 2 2 4 142.292 6.00897 2
 -2 2 -4 143.525 6.09715 4
 -4 -2 -4 19.0356 2.33008 3
 4 -2 4 17.895 1.63607 2
 4 -2 4 21.4078 3.09575 5
 4 -2 4 14.0666 1.98548 2
 -4 -2 -4 18.7476 2.42511 2
 -4 2 -4 22.0363 3.25121 4
 4 2 4 19.9188 2.46295 2
 -6 -2 -4 202.515 8.43022 2
 6 -2 4 197.148 9.27996 5
 6 -2 4 196.405 7.64028 2
 6 -2 4 213.358 7.64567 2
 6 2 4 217.249 8.50061 2
 -6 2 -4 209.972 8.54901 4
 8 -2 4 57.0681 5.12004 5
 8 -2 4 49.8744 3.65624 2
 8 -2 4 57.8521 3.51198 2
 -8 -2 -4 57.9817 4.523 2
 -8 2 -4 57.726 4.63961 4
 8 2 4 56.3576 4.47353 2
 -10 -2 -4 -3.7123 2.66341 2
 10 -2 4 -2.4106 2.96531 5
 -10 2 -4 0.44205 2.67711 4
 10 2 4 -3.307 2.57453 2
 -12 -2 -4 50.6684 5.3022 2
 12 -2 4 50.9629 5.70522 5
 12 -2 4 47.2411 4.18359 2
 12 -2 4 45.6328 4.2857 2
 12 2 4 49.3495 5.33561 2
 14 -2 4 97.5887 5.99672 2
 -14 -2 -4 96.1276 7.01328 2
 14 -2 4 97.0637 5.82731 2
 14 2 4 77.7936 4.74401 3
 14 2 4 105.368 6.7681 2
 16 -2 4 257.694 11.2329 2
 16 -2 4 264.841 11.4342 2
 -16 -2 -4 273.289 12.0358 2
 16 2 4 292.825 12.2501 2
 16 2 4 256.486 10.3396 3
 18 -2 4 4.5803 3.67316 2
 -18 -2 -4 -2.5451 4.38959 2
 18 2 4 11.4237 3.91362 2
 18 2 4 3.66388 3.76618 2
 18 2 4 8.45449 2.48158 3
 20 -2 4 21.4723 4.48501 2
 20 -2 4 23.1099 4.68306 2
 20 2 4 19.0811 4.3027 2
 20 2 4 14.3465 4.18058 2
 22 -2 4 25.6629 5.57877 2
 22 -2 4 28.1486 5.20043 2
 22 2 4 28.6856 4.8254 2
 24 -2 4 14.8844 5.7616 2
 24 2 4 9.79664 4.99264 2
 29 -3 -4 -3.3658 5.44969 2
 29 -3 -4 -6.8118 5.83127 2
 29 3 -4 0.0729 4.65484 2
 29 3 -4 -3.5939 6.41546 3
 -29 3 4 -1.7066 7.68962 5
 27 -3 -4 7.04196 7.40435 6
 27 -3 -4 -9.3434 5.21857 2
 27 -3 -4 -8.8438 4.81827 2
 27 3 -4 3.45439 4.43306 2
 25 -3 -4 -3.0745 4.37201 2
 25 -3 -4 -3.8353 4.11216 2
 25 -3 -4 -0.0525 6.08671 6
 25 3 -4 -3.5553 4.51058 3
 25 3 -4 4.14969 3.89157 2
 23 -3 -4 31.3655 4.71286 2
 23 -3 -4 46.4433 7.18259 6
 23 -3 -4 29.5905 4.83562 2
 -23 3 4 41.4179 6.7957 5
 23 3 -4 36.4645 5.18373 2
 23 3 -4 33.0769 4.83396 3
 21 -3 -4 28.1911 5.90749 6
 21 -3 -4 20.8341 4.45473 2
 21 -3 -4 16.0185 4.16254 2
 21 3 -4 27.058 4.27285 3
 -21 3 4 25.9663 4.96932 2
 21 3 -4 20.7916 4.32528 2
 -21 3 4 20.6259 6.50247 5
 19 -3 -4 35.8173 4.28599 2
 19 -3 -4 48.629 6.41696 6
 -19 3 4 46.056 6.32043 5
 19 3 -4 39.6375 5.95486 2
 -19 3 4 50.9169 6.10476 2
 19 3 -4 48.4449 5.3089 3
 19 3 -4 58.8188 6.36578 2
 17 -3 -4 35.2155 4.68864 2
 17 -3 -4 43.1977 5.7441 6
 17 3 -4 47.6162 4.85589 3
 17 3 -4 44.27 5.33426 2
 -17 3 4 47.7993 6.90799 5
 -17 3 4 46.9283 5.20183 2
 17 3 -4 47.8793 5.35536 2
 15 -3 -4 76.3876 4.93286 2
 15 -3 -4 78.2843 6.01637 6
 15 3 -4 77.8495 5.55027 2
 15 3 -4 72.9573 5.06705 3
 15 3 -4 72.3308 5.48714 2
 -15 3 4 71.5777 5.20722 2
 13 -3 -4 71.72 4.69576 2
 13 -3 -4 80.6125 5.92335 6
 13 3 -4 89.3536 5.21757 2
 13 3 -4 79.3747 5.25848 2
 13 3 -4 80.2239 4.96928 3
 -13 3 4 64.4673 6.88935 5
 -13 3 4 65.3496 4.75782 2
 11 -3 -4 156.35 8.21215 6
 11 -3 -4 158.898 6.68989 2
 -11 3 4 151.493 6.77751 2
 11 3 -4 161.69 6.99941 2
 11 3 -4 161.587 7.2108 3
 -11 3 4 164.595 6.76675 4
 11 3 -4 160.866 7.02212 2
 9 -3 -4 143.773 6.12842 2
 9 -3 -4 155.237 7.91042 6
 9 3 -4 154.069 6.48901 2
 -9 3 4 144.543 7.88105 6
 -9 3 4 148.807 6.13439 4
 9 3 -4 157.289 6.94054 3
 -9 3 4 152.919 6.46346 2
 9 3 -4 145.822 6.36751 2
 7 -3 -4 102.604 4.61755 2
 -7 -3 4 95.9502 5.15962 3
 -7 3 4 99.2007 4.63069 2
 7 3 -4 98.9556 5.22398 3
 -7 3 4 92.6259 6.21741 6
 7 3 -4 92.0103 4.57536 2
 7 3 -4 96.224 5.62475 6
 7 3 -4 95.9069 5.90001 1
 7 3 -4 94.7574 4.58911 2
 5 -3 -4 0.55332 1.46385 4
 5 -3 -4 5.63545 1.84267 2
 -5 -3 4 3.96132 2.47485 3
 -5 -3 4 3.01936 2.34024 5
 5 3 -4 6.68071 2.54305 3
 5 3 -4 0.11265 1.53317 2
 -5 3 4 2.1219 3.22619 6
 5 3 -4 2.56453 1.57761 2
 -5 3 4 5.63711 1.80691 2
 5 3 -4 5.35533 3.00049 6
 5 3 -4 2.89935 2.94244 1
 -3 -3 4 6.79955 2.83344 6
 -3 -3 4 2.27815 2.39092 5
 -3 -3 4 -4.3753 3.06964 1
 -3 -3 4 5.36047 2.56563 3
 3 3 -4 1.09092 1.25184 2
 3 3 -4 3.36445 3.13779 6
 3 3 -4 1.23422 1.1894 2
 -1 -3 4 424.997 16.3159 1
 1 -3 -4 379.127 14.5077 2
 -1 -3 4 404.369 16.8139 6
 -1 -3 4 424.587 14.8803 4
 -1 -3 4 395.172 16.0343 5
 1 -3 -4 423.398 16.167 1
 -1 -3 4 435.036 15.2747 3
 -1 3 4 393.581 14.5597 2
 1 -3 4 28.1333 4.32443 5
 1 -3 4 33.5516 3.82935 4
 1 -3 4 24.2738 3.6707 3
 -1 -3 -4 35.5546 3.79378 2
 1 -3 4 33.0166 4.13407 6
 1 -3 4 23.8796 3.78905 1
 1 3 4 36.7866 3.91172 1
 1 3 4 33.7804 3.56194 2
 3 -3 4 18.2466 2.76711 4
 3 -3 4 21.7616 3.39182 5
 3 -3 4 20.5086 2.90441 3
 3 -3 4 24.1374 4.4926 6
 -3 -3 -4 18.0874 2.6025 3
 -3 -3 -4 24.7766 3.65883 2
 3 3 4 22.0752 3.41063 1
 3 3 4 18.6004 2.70884 2
 -3 3 -4 27.0547 3.74483 4
 5 -3 4 234.105 8.48592 2
 -5 -3 -4 236.928 9.4904 3
 5 -3 4 234.327 10.7534 5
 -5 -3 -4 240.967 9.7484 2
 5 -3 4 249.362 11.3624 6
 5 -3 4 239.383 8.59552 2
 5 3 4 255.483 9.69138 2
 -5 3 -4 241.341 9.76057 4
 5 3 4 250.039 10.463 1
 7 -3 4 44.3599 3.05338 2
 7 -3 4 45.3803 5.2239 5
 7 -3 4 47.8596 3.12819 2
 -7 -3 -4 41.9919 4.69697 2
 -7 -3 -4 38.9253 3.48124 3
 7 3 4 45.2783 4.65687 2
 -7 3 -4 49.5253 4.56089 4
 -9 -3 -4 97.798 6.20862 2
 9 -3 4 110.013 4.93451 2
 9 -3 4 105.246 6.89906 5
 9 -3 4 98.7398 4.84512 2
 -9 3 -4 109.698 6.2298 4
 9 3 4 100.394 6.54256 2
 11 -3 4 163.38 8.87847 5
 11 -3 4 155.848 6.8633 2
 11 -3 4 164.549 7.00712 2
 -11 -3 -4 158.641 8.32174 2
 11 3 4 157.978 8.10648 2
 -11 3 -4 161.138 8.25342 4
 -13 -3 -4 32.1709 4.50539 2
 13 -3 4 33.4865 4.3307 2
 13 -3 4 24.8585 4.25249 2
 13 3 4 31.1855 4.17647 2
 -13 3 -4 30.2809 4.22764 4
 15 -3 4 3.32421 3.07275 2
 15 -3 4 2.75803 3.19212 2
 -15 -3 -4 7.82547 4.14583 2
 15 3 4 5.71842 3.65132 2
 -15 3 -4 -4.4878 3.98458 4
 17 -3 4 50.3102 6.05195 2
 17 -3 4 48.5553 6.33605 2
 -17 -3 -4 49.3549 7.33222 2
 -17 3 -4 58.7758 7.69088 4
 17 3 4 60.4425 7.06726 2
 -19 -3 -4 -8.6852 4.69374 2
 19 -3 4 -1.8482 3.59384 2
 19 -3 4 -0.5248 4.1035 2
 -19 3 -4 -2.9336 4.77773 4
 19 3 4 -5.0677 3.83678 2
 21 -3 4 -1.9704 4.64387 2
 21 -3 4 -2.0473 4.73466 2
 21 3 4 -2.977 3.79043 2
 23 -3 4 1.68886 5.64051 2
 -23 3 -4 -0.056 5.66708 4
 23 3 4 4.78107 5.01048 2
 28 -4 -4 4.0447 6.02403 2
 28 -4 -4 15.2929 6.79419 2
 28 4 -4 19.8742 5.32339 2
 26 -4 -4 11.6858 7.96702 6
 26 -4 -4 7.36092 5.59293 2
 26 4 -4 9.36618 5.9746 3
 26 4 -4 15.1076 5.04515 2
 24 -4 -4 25.2535 5.49384 2
 24 -4 -4 17.2593 5.26751 2
 24 4 -4 21.3109 4.6478 2
 24 4 -4 25.0908 5.38812 3
 22 -4 -4 47.6157 7.59228 2
 22 -4 -4 61.198 9.43387 6
 22 4 -4 35.2339 5.40843 3
 -22 4 4 33.5169 6.17838 4
 -22 4 4 44.7198 7.18051 2
 20 -4 -4 55.2343 7.09832 2
 20 -4 -4 79.467 8.96458 6
 -20 4 4 76.8378 9.59697 5
 20 4 -4 69.8584 7.72378 2
 -20 4 4 60.7699 7.984 4
 20 4 -4 74.2828 6.77157 3
 -20 4 4 64.5152 7.47866 2
 18 -4 -4 5.22633 5.46647 6
 18 4 -4 2.01701 4.06049 2
 18 4 -4 -0.672 3.67286 3
 18 4 -4 -2.5142 3.78093 2
 -18 4 4 -5.6664 3.93621 4
 -18 4 4 -9.3364 5.40676 5
 16 -4 -4 -0.434 3.18992 2
 16 -4 -4 7.86789 4.53642 6
 -16 4 4 5.68955 3.40212 4
 16 4 -4 5.97683 3.36455 3
 16 4 -4 4.89186 3.70204 2
 -16 4 4 0.49416 3.44899 2
 16 4 -4 -0.027 3.45944 2
 -16 4 4 2.51803 5.15078 5
 14 -4 -4 30.2434 4.92639 6
 -14 4 4 24.1437 3.53915 2
 14 4 -4 24.6508 3.88349 2
 -14 4 4 28.274 4.69996 4
 -14 4 4 28.5338 5.48016 5
 14 4 -4 32.3041 3.80539 2
 14 4 -4 33.2491 5.01518 3
 12 -4 -4 70.8927 6.79171 6
 -12 -4 4 79.979 4.59204 5
 -12 4 4 83.1672 5.09089 4
 12 4 -4 74.8981 5.3242 2
 -12 4 4 75.9483 5.05101 2
 12 4 -4 86.6164 5.7146 3
 12 4 -4 77.4841 5.66611 2
 -12 4 4 69.5097 7.02508 5
 12 4 -4 82.5242 6.33939 1
 -10 -4 4 101.437 5.32174 5
 10 -4 -4 100.869 7.047 6
 10 4 -4 91.8314 6.59873 6
 -10 4 4 103.565 5.32179 2
 10 4 -4 93.5119 5.79317 3
 10 4 -4 103.433 5.55869 2
 10 4 -4 106.249 6.80159 1
 -10 4 4 84.3804 7.25907 6
 -10 4 4 107.28 5.37304 4
 10 4 -4 104.941 5.82109 2
 -10 4 4 93.6141 7.34701 5
 -8 -4 4 67.1141 5.10168 3
 -8 -4 4 60.964 4.51224 5
 -8 4 4 58.3071 6.01513 5
 -8 4 4 47.7232 6.09685 6
 8 4 -4 71.7085 5.81252 1
 8 4 -4 67.9106 5.24659 3
 8 4 -4 61.7104 4.22291 2
 8 4 -4 56.4727 5.66832 6
 -8 4 4 65.0402 4.12358 2
 8 4 -4 64.4445 4.33316 2
 6 -4 -4 -4.4679 3.58791 1
 -6 -4 4 6.79172 3.04432 3
 6 -4 -4 5.00605 2.0508 2
 -6 -4 4 1.13316 2.84942 5
 6 4 -4 6.88332 3.48506 1
 6 4 -4 2.14649 3.71635 6
 -6 4 4 -6.3147 4.32144 6
 -6 4 4 -0.5017 3.38977 5
 6 4 -4 4.00615 1.99426 2
 -6 4 4 2.32613 2.13611 2
 6 4 -4 0.29585 1.95722 2
 -4 -4 4 98.084 5.9367 3
 4 -4 -4 98.5959 4.94104 2
 4 -4 -4 75.5861 6.61277 1
 -4 -4 4 77.2922 6.77549 1
 -4 -4 4 90.0017 5.86545 5
 4 -4 -4 96.762 4.95061 4
 -4 4 4 104.57 5.04718 2
 4 4 -4 100.935 6.62885 6
 4 4 -4 111.118 6.34849 1
 -4 4 4 99.0997 7.11822 6
 -4 4 4 94.8443 6.12382 5
 -2 -4 4 400.287 16.7608 6
 -2 -4 4 395.8 16.4509 1
 2 -4 -4 402.645 14.4147 2
 2 -4 -4 390.765 16.264 1
 -2 -4 4 376.048 15.8818 5
 -2 -4 4 390.884 15.2736 3
 -2 4 4 429.023 14.5228 2
 -2 4 4 380.495 15.6164 5
 -2 4 4 403.728 17.1947 6
 2 4 -4 395.115 16.9683 6
 0 -4 4 57.2087 5.188 4
 0 -4 4 43.2799 4.84537 3
 0 -4 4 52.7055 5.50205 5
 0 -4 -4 45.2431 5.42528 1
 0 -4 4 69.3797 5.74525 6
 0 -4 4 52.1012 5.73989 1
 0 4 4 65.5588 4.28101 2
 0 4 4 66.2941 4.55616 5
 2 -4 4 112.804 6.72968 3
 2 -4 4 126.715 7.42021 5
 -2 -4 -4 139.711 6.47132 2
 2 -4 4 126.392 7.05367 4
 -2 -4 -4 113.59 6.4287 3
 2 4 4 137.041 6.29077 2
 2 4 4 116.385 5.87144 5
 2 4 4 122.097 7.11146 1
 4 -4 4 9.49036 3.599 5
 4 -4 4 1.04154 3.03569 3
 -4 -4 -4 8.48265 2.84857 2
 4 -4 4 5.6335 3.05629 4
 4 -4 4 13.5728 4.42353 6
 4 4 4 11.8802 2.79768 2
 4 4 4 6.34752 3.55185 1
 -6 -4 -4 2.08611 2.7923 3
 -6 -4 -4 8.0317 3.08409 2
 6 -4 4 -0.2383 4.00085 6
 6 -4 4 7.96885 3.77752 5
 6 4 4 5.19823 3.73439 1
 -6 4 -4 4.97601 2.84554 4
 6 4 4 7.35508 2.93953 2
 8 -4 4 4.71835 1.77346 2
 -8 -4 -4 -3.6129 2.98823 3
 8 -4 4 1.19903 4.69779 6
 -8 -4 -4 3.88774 3.26884 2
 8 -4 4 8.70391 4.16489 5
 8 4 4 4.07941 3.87836 1
 8 4 4 3.39989 3.12623 2
 -8 4 -4 2.28226 3.06485 4
 10 -4 4 12.7661 2.44017 2
 10 -4 4 10.3605 5.37735 6
 -10 -4 -4 13.5059 3.85089 2
 -10 4 -4 14.791 3.67242 4
 10 4 4 17.527 4.57145 1
 10 4 4 11.6662 3.82255 2
 12 -4 4 31.167 6.29879 6
 -12 -4 -4 41.2749 4.98754 2
 12 -4 4 34.6952 4.57385 2
 -12 4 -4 32.7175 4.54726 4
 12 4 4 36.8921 6.68678 2
 14 -4 4 31.1571 6.55114 6
 14 -4 4 27.5359 4.14456 2
 -14 -4 -4 31.5951 5.21982 2
 -14 4 -4 33.2006 4.75238 4
 16 -4 4 -1.9988 4.18283 2
 -16 -4 -4 9.46273 4.61249 2
 16 -4 4 7.47998 3.63351 2
 16 -4 4 7.16534 6.35298 6
 -16 4 -4 13.9341 4.49541 4
 18 -4 4 13.5798 6.76516 6
 -18 -4 -4 15.9339 5.01132 2
 18 -4 4 11.013 4.94418 2
 -18 4 -4 27.6657 5.16101 4
 -20 -4 -4 -2.9188 4.83216 2
 20 4 4 8.03171 4.45953 2
 -20 4 -4 11.5581 5.19944 4
 22 -4 4 -1.8252 6.26379 2
 -22 4 -4 14.3467 5.7941 4
 22 4 4 -3.2162 4.86445 2
 25 -5 -4 -3.0799 8.29954 6
 25 5 -4 6.93311 5.70701 2
 -25 5 4 1.6836 6.88432 4
 -25 5 4 -4.5233 7.20944 5
 23 -5 -4 6.42369 5.18361 2
 23 -5 -4 9.02248 8.01918 6
 -23 5 4 13.5504 6.98543 5
 -23 5 4 -6.1329 5.8472 2
 -23 5 4 15.7618 6.266 4
 23 5 -4 6.37351 5.39348 2
 23 5 -4 15.7166 5.92322 3
 21 -5 -4 102.716 10.3626 6
 21 5 -4 100.263 8.99461 3
 21 5 -4 93.444 8.64289 2
 -21 5 4 97.853 9.62491 4
 19 -5 -4 203.474 13.1903 6
 19 5 -4 211.908 11.1053 3
 19 5 -4 215.429 12.006 2
 -19 5 4 213.068 12.7151 5
 -19 5 4 187.594 10.3723 2
 -19 5 4 200.462 10.9696 4
 17 -5 -4 -1.6304 6.30423 6
 17 5 -4 14.8589 5.51162 1
 17 5 -4 13.2094 4.46806 3
 -17 5 4 -1.3455 4.43501 2
 -17 5 4 3.57439 6.11597 5
 -17 5 4 8.67068 4.3574 4
 17 5 -4 7.84864 4.437 2
 15 -5 -4 65.3052 8.2541 6
 15 5 -4 64.6619 6.693 2
 -15 5 4 64.0772 6.31006 2
 -15 5 4 56.7242 8.50076 5
 -15 5 4 66.2895 6.40665 4
 15 5 -4 57.4858 7.1319 1
 15 5 -4 53.3607 6.5321 3
 13 -5 -4 52.0646 7.59316 6
 13 5 -4 63.3269 6.83 1
 -13 5 4 46.8095 7.74471 5
 -13 5 4 45.3443 5.28257 2
 13 5 -4 52.1296 5.84238 2
 13 5 -4 50.1374 6.06994 3
 11 5 -4 69.3871 5.61696 2
 -11 5 4 80.6131 5.62186 2
 -11 5 4 73.8802 7.60628 6
 11 5 -4 80.1307 7.05444 1
 -11 5 4 61.2072 7.67062 5
 11 5 -4 74.3702 7.47181 6
 -9 -5 4 54.8248 5.15408 5
 -9 -5 4 50.8743 5.28591 3
 -9 5 4 44.0374 6.88293 5
 9 5 -4 53.9535 4.87922 2
 -9 5 4 49.6311 5.0363 2
 9 5 -4 50.0121 6.05677 1
 9 5 -4 55.5393 6.80998 6
 -9 5 4 43.7099 6.85017 6
 7 -5 -4 12.2701 4.48712 1
 -7 -5 4 10.962 3.71396 3
 -7 -5 4 16.5655 3.65758 5
 7 5 -4 9.44253 4.42791 1
 7 5 -4 13.2257 4.83155 6
 -7 5 4 8.52354 2.6865 2
 -7 5 4 7.21018 4.2955 5
 7 5 -4 12.0768 2.76161 2
 -5 -5 4 3.56557 3.69781 5
 5 -5 -4 0.69622 2.69901 4
 5 -5 -4 -5.2289 4.13507 1
 -5 -5 4 -1.9266 3.4112 3
 5 -5 -4 4.89193 2.70983 2
 5 5 -4 -1.982 3.63022 1
 5 5 -4 -2.0408 4.24904 6
 -5 5 4 -4.3243 3.77562 5
 5 5 -4 -0.4573 2.20701 2
 -5 5 4 -8.0182 5.00292 6
 3 -5 -4 5.97528 2.58341 4
 -3 -5 4 4.04009 3.61569 3
 -3 -5 4 4.17652 4.33357 1
 3 -5 -4 9.20636 2.82135 2
 3 -5 -4 5.9998 4.43276 1
 -3 -5 4 5.74277 3.79055 5
 -3 5 4 0.34492 3.62769 5
 3 5 -4 4.17694 1.92369 2
 -3 5 4 -1.3064 5.34399 6
 -3 5 4 8.30565 2.68125 2
 -1 -5 4 29.2477 5.55395 5
 -1 -5 4 36.027 5.26472 1
 -1 -5 4 30.2487 3.8843 4
 -1 -5 4 32.0611 5.37475 3
 1 -5 -4 33.7745 5.71743 1
 1 5 -4 37.6783 6.08601 6
 -1 5 4 24.867 4.82524 5
 -1 5 4 35.1141 5.78855 6
 1 -5 4 59.0544 6.79412 6
 1 -5 4 48.1138 5.37276 3
 1 -5 4 61.7444 6.74977 5
 1 -5 4 55.0003 5.9242 4
 1 -5 4 37.4541 6.56806 1
 -1 -5 -4 46.2655 5.48159 3
 1 5 4 44.5853 4.6302 5
 3 -5 4 15.5522 5.00413 1
 3 -5 4 32.1548 5.74062 4
 -3 -5 -4 22.0522 4.20912 3
 3 -5 4 30.564 5.86044 6
 3 -5 4 19.6072 4.1362 3
 3 5 4 28.2974 4.53373 1
 3 5 4 20.9789 3.82017 5
 5 -5 4 155.186 9.90779 6
 -5 -5 -4 171.613 8.81072 2
 5 -5 4 155.443 8.52953 3
 5 -5 4 149.57 9.25918 1
 -5 -5 -4 140.422 8.2886 3
 5 -5 4 163.057 8.99478 4
 5 -5 4 175.78 9.35752 5
 5 5 4 155.618 9.00556 1
 -7 -5 -4 169.937 9.05879 2
 7 -5 4 169.688 8.97715 3
 7 -5 4 171.024 9.7347 1
 -7 -5 -4 158.719 8.8363 3
 7 -5 4 179.664 10.8975 6
 7 5 4 164.221 9.48568 1
 -9 -5 -4 280.703 12.0755 2
 9 -5 4 260.61 14.5504 6
 -9 -5 -4 241.332 11.5717 3
 9 5 4 278.954 12.8044 1
 11 -5 4 150.699 11.0301 6
 -11 -5 -4 132.131 9.13042 2
 11 5 4 134.824 8.9309 1
 -11 5 -4 131.446 8.86061 4
 -13 -5 -4 7.68654 4.97784 2
 13 -5 4 5.60233 6.6697 6
 -13 5 -4 5.26252 4.53591 4
 13 5 4 1.24501 5.21003 1
 13 5 4 7.98774 4.72731 2
 15 -5 4 -7.34 6.40604 6
 -15 -5 -4 -5.4662 4.64283 2
 -15 5 -4 8.58047 5.02046 4
 15 5 4 -2.1877 6.03547 1
 -17 -5 -4 18.1059 5.35705 2
 17 5 4 28.8791 7.08526 1
 -17 5 -4 28.3046 5.80211 4
 17 5 4 28.941 5.35907 2
 -19 -5 -4 8.38495 5.64662 2
 -19 5 -4 13.5928 5.82968 4
 22 -6 -4 2.22615 9.1714 6
 -22 6 4 7.09738 6.37263 2
 -22 6 4 21.0139 7.52649 4
 22 6 -4 18.6098 6.6749 1
 22 6 -4 21.1294 6.74155 2
 20 -6 -4 18.976 8.10566 6
 -20 6 4 8.96397 5.83914 2
 -20 6 4 11.1883 7.36141 5
 20 6 -4 2.48868 5.92008 2
 20 6 -4 9.36591 5.70418 1
 -20 6 4 9.01165 6.27834 4
 -18 6 4 36.2864 7.60086 5
 18 6 -4 33.4685 6.48186 2
 18 6 -4 37.167 7.17799 1
 -18 6 4 20.9739 6.05105 4
 -18 6 4 27.4021 5.76887 2
 16 -6 -4 12.2356 7.22646 6
 -16 6 4 9.53023 6.49612 5
 16 6 -4 2.95187 5.24851 2
 16 6 -4 8.34334 7.44984 6
 16 6 -4 11.1995 5.54213 1
 14 6 -4 9.91973 5.24423 2
 -14 6 4 12.8231 6.48517 5
 14 6 -4 12.8974 5.39432 1
 14 6 -4 11.4732 7.49407 6
 12 -6 -4 8.27712 5.35488 1
 12 6 -4 6.65255 4.30316 2
 -12 6 4 -5.4879 5.59867 5
 12 6 -4 9.44313 6.54408 6
 12 6 -4 6.67502 5.55828 1
 10 -6 -4 18.7669 5.45179 1
 -10 -6 4 6.78017 4.6527 3
 10 6 -4 8.47122 3.88204 2
 -10 6 4 0.10992 5.3684 5
 -10 6 4 4.36003 6.99345 6
 10 6 -4 8.7311 5.07556 1
 10 6 -4 5.32141 6.20512 6
 -8 -6 4 9.11785 4.6033 3
 8 -6 -4 12.8371 4.8509 1
 -8 6 4 11.781 3.76968 2
 8 6 -4 10.7957 3.67199 2
 8 6 -4 7.44858 6.36468 6
 8 6 -4 11.8473 5.15404 1
 -8 6 4 8.06683 5.22306 5
 6 -6 -4 3.20001 4.86257 1
 6 -6 -4 9.11194 3.56381 2
 6 -6 -4 -1.4128 3.78212 4
 -6 -6 4 8.2887 4.66232 3
 -6 6 4 10.0507 4.92024 5
 -6 6 4 -0.4914 6.38212 6
 6 6 -4 8.09577 5.70559 6
 -6 6 4 9.82306 3.57302 2
 6 6 -4 8.35828 3.22928 2
 4 -6 -4 50.0716 5.67924 2
 -4 -6 4 36.6915 6.4459 3
 4 -6 -4 33.0864 5.98443 4
 -4 6 4 43.9124 8.63757 6
 -4 6 4 53.5241 6.69674 5
 4 6 -4 28.8413 6.98413 6
 -2 -6 4 16.1982 5.61558 1
 2 -6 -4 12.749 5.25347 1
 2 -6 -4 10.2132 4.55403 3
 -2 -6 4 9.71448 4.36094 3
 2 -6 -4 4.72317 3.55994 4
 -2 -6 4 10.3353 4.2199 4
 -2 6 4 15.3657 6.663 6
 -2 6 4 8.43231 4.39941 5
 2 6 -4 8.58577 5.95589 6
 0 -6 4 9.6062 4.40645 3
 0 -6 -4 6.33182 4.50216 3
 0 -6 4 13.8697 4.40402 4
 0 -6 4 9.26439 5.44647 1
 0 6 4 20.8382 6.57665 6
 0 6 4 18.5682 4.02145 2
 0 6 4 12.1501 4.06934 5
 -2 -6 -4 48.0015 6.81428 2
 2 -6 4 45.7222 7.3204 1
 2 -6 4 51.4057 7.99054 6
 2 6 4 37.0797 5.1345 5
 2 6 4 49.5523 6.78966 2
 2 6 4 32.1104 7.48739 6
 -4 -6 -4 6.52409 4.64389 3
 -4 -6 -4 18.8942 5.01669 2
 4 -6 4 4.57135 4.47789 3
 4 -6 4 25.9222 6.65117 6
 4 6 4 10.211 4.21882 2
 4 6 4 32.1878 6.29267 1
 -6 -6 -4 10.0761 5.09192 2
 6 -6 4 2.23929 4.23948 3
 6 -6 4 1.28141 6.37971 6
 -6 -6 -4 3.70445 4.86882 3
 6 6 4 3.87598 4.81609 1
 -8 -6 -4 -0.084 4.95061 3
 -8 -6 -4 4.94594 5.05694 2
 8 -6 4 10.8355 4.97134 3
 8 -6 4 5.68582 6.47532 6
 8 6 4 9.37197 5.4212 1
 10 -6 4 33.231 6.16574 1
 -10 -6 -4 28.587 5.9405 2
 10 -6 4 48.1221 9.8924 6
 10 -6 4 40.8186 7.13653 3
 10 6 4 40.7326 7.29444 1
 12 -6 4 -0.5736 4.95556 3
 -12 -6 -4 1.48334 5.93864 2
 12 6 4 2.51612 6.06353 1
 -14 -6 -4 6.97654 6.44944 2
 14 -6 4 -4.5446 5.99486 3
 14 6 4 5.98871 6.44394 1
 -16 -6 -4 -8.912 6.98469 2
 16 6 4 11.8784 7.19189 1
 -16 6 -4 1.07052 6.141 4
 19 7 -4 40.7311 7.45798 1
 17 7 -4 8.78119 6.09372 1
 17 7 -4 -4.8881 6.8655 2
 15 -7 -4 21.3406 6.37795 1
 15 7 -4 19.0438 9.68113 6
 15 7 -4 10.1907 6.44193 2
 -15 7 4 22.3373 8.04606 5
 15 7 -4 6.99867 5.6703 1
 13 -7 -4 37.9715 6.72713 1
 13 7 -4 17.3481 6.43151 2
 13 7 -4 28.1345 5.89499 1
 11 7 -4 44.2275 7.90094 2
 11 7 -4 44.8863 7.35703 1
 11 7 -4 58.0362 11.2915 6
 -9 -7 4 76.9116 8.10882 3
 9 -7 -4 80.6733 8.13227 1
 9 7 -4 72.5672 10.8407 6
 -9 7 4 91.3201 10.2571 5
 -9 7 4 89.4098 9.74857 6
 9 7 -4 73.9172 7.88855 1
 -7 -7 4 17.5059 5.24138 3
 7 -7 -4 22.617 6.36878 1
 -7 7 4 30.0803 6.89756 5
 7 7 -4 11.391 4.62459 2
 -7 7 4 20.1557 5.01705 2
 -7 7 4 19.1958 7.95313 6
 7 7 -4 36.1674 8.21939 6
 5 -7 -4 -5.3221 5.08382 1
 5 -7 -4 3.87896 4.66371 2
 -5 -7 4 1.89341 5.1605 3
 5 -7 -4 -0.8497 4.90918 3
 5 -7 -4 -0.2342 4.8366 4
 -5 7 4 0.40741 6.20305 5
 5 7 -4 -3.7481 3.66938 2
 -5 7 4 -4.4781 6.94862 6
 5 7 -4 1.72017 6.61615 6
 -3 -7 4 3.64731 4.95829 4
 3 -7 -4 9.30161 5.97972 1
 3 -7 -4 12.5287 4.96914 2
 3 -7 -4 0.90182 4.88053 4
 3 -7 -4 5.83948 5.08019 3
 -3 -7 4 7.4942 5.14687 3
 -3 7 4 6.23021 8.39221 6
 3 7 -4 3.31248 6.74409 6
 -3 7 4 11.3402 6.06409 5
 -1 -7 4 21.4137 5.56888 4
 1 -7 -4 20.9247 5.35076 3
 1 -7 -4 16.0965 4.84167 4
 -1 -7 4 33.3297 6.41039 1
 1 -7 -4 26.1549 6.53181 1
 -1 -7 4 18.8232 5.51721 3
 -1 7 4 23.6377 5.06984 2
 -1 7 4 28.3322 8.28253 6
 -1 7 4 25.7354 6.00032 5
 1 -7 4 3.58413 5.1972 3
 1 -7 4 20.0523 5.81072 4
 1 -7 4 9.87671 6.11402 1
 -1 -7 -4 11.1149 5.31203 3
 -1 -7 -4 26.6682 5.95143 2
 1 7 4 26.5645 7.79679 6
 3 -7 4 24.0398 6.07525 4
 3 -7 4 13.9078 5.26153 3
 3 -7 4 19.5093 6.32829 1
 -3 -7 -4 15.3296 5.61012 3
 3 7 4 24.3449 7.79307 6
 5 -7 4 21.6988 5.60611 3
 5 -7 4 37.3208 6.43367 1
 5 -7 4 33.774 6.49539 4
 -5 -7 -4 30.6569 6.4403 3
 7 -7 4 63.199 10.0571 6
 7 -7 4 47.0447 7.78996 1
 7 -7 4 34.4372 6.72829 3
 -7 -7 -4 72.2209 9.85725 2
 -7 -7 -4 52.3541 8.97819 3
 7 7 4 48.5881 7.91851 1
 -9 -7 -4 77.7332 10.0962 2
 9 -7 4 53.9574 10.9914 6
 9 -7 4 76.9489 8.3821 3
 9 -7 4 72.2231 8.18175 1
 -9 -7 -4 55.2533 9.38334 3
 9 7 4 63.797 8.59238 1
 11 -7 4 19.3763 6.19838 3
 11 -7 4 8.27529 8.5837 6
 -11 -7 -4 25.8195 7.56321 2
 11 7 4 18.618 6.91412 1
 -13 -7 -4 -2.9566 7.22458 2
 13 -7 4 1.90066 7.0697 3
 13 -7 4 1.97353 6.83594 1
 13 -7 4 -12.837 8.79199 6
 13 7 4 8.75482 7.44277 1
 12 -8 -4 -4.4315 6.36504 1
 12 8 -4 -2.4725 5.74705 1
 10 -8 -4 16.5568 6.7834 1
 10 8 -4 15.5468 5.60074 1
 10 8 -4 29.0985 10.0055 6
 8 -8 -4 67.1945 8.56986 3
 -8 8 4 74.6146 11.4385 5
 8 8 -4 84.6971 12.6258 6
 -8 8 4 52.5754 10.2228 6
 6 -8 -4 30.2392 6.1801 3
 -6 -8 4 18.0021 5.74807 3
 -6 -8 4 11.3082 6.98702 4
 -6 8 4 26.3521 8.72195 5
 6 8 -4 28.8581 9.99468 6
 -6 8 4 5.55027 8.10217 6
 -4 -8 4 6.76226 7.11365 4
 4 -8 -4 11.9543 6.63524 4
 4 -8 -4 10.2259 5.64275 3
 4 -8 -4 9.93849 6.36541 1
 -4 8 4 3.36227 7.91971 6
 -4 8 4 23.317 8.41698 5
 2 -8 -4 6.28872 6.60803 4
 -2 -8 4 4.37666 6.9335 4
 -2 -8 4 20.8493 6.25755 3
 2 -8 -4 9.87079 6.15258 3
 -2 8 4 6.41838 8.92151 6
 0 -8 4 10.1888 6.27645 1
 0 -8 -4 15.248 5.75528 3
 0 -8 4 9.3034 7.79257 4
 0 -8 4 8.39112 5.57154 3
 0 -8 -4 1.83542 7.01068 4
 2 -8 4 17.6921 7.35997 4
 2 -8 4 11.3023 6.17444 1
 2 -8 4 14.0005 5.65562 3
 -2 -8 -4 12.881 6.55608 3
 2 8 4 23.7421 9.10012 6
 -4 -8 -4 10.4758 6.85009 3
 4 -8 4 18.1438 7.87106 4
 4 -8 4 16.3827 6.16609 3
 4 -8 4 6.09223 5.66914 1
 -6 -8 -4 17.5883 7.68596 3
 -6 -8 -4 20.8945 8.81356 2
 6 -8 4 10.4389 6.0571 1
 6 -8 4 10.6698 6.32909 3
 6 8 4 12.3759 9.55103 6
 32 0 -5 8.10177 5.80853 2
 30 0 -5 1.3693 4.41264 2
 28 0 -5 7.23195 4.0829 2
 26 0 -5 4.95061 3.93031 2
 26 0 -5 7.15475 3.80373 2
 24 0 -5 -3.4901 3.25577 2
 -22 0 5 -4.6599 4.31621 5
 22 0 -5 -0.6949 3.00635 2
 22 0 -5 0.6303 2.98376 2
 20 0 -5 -2.0276 2.59491 2
 20 0 -5 3.24861 2.66464 2
 -20 0 5 1.11183 3.00286 2
 18 0 -5 3.63006 2.48838 2
 18 0 -5 4.78542 2.42057 2
 -18 0 5 1.63218 2.82906 2
 16 0 -5 7.85592 2.32999 2
 -16 0 5 2.37647 2.56357 2
 -14 0 5 7.19941 2.62859 2
 12 0 -5 1.38559 1.73748 2
 -12 0 5 -1.8496 1.98709 2
 -10 0 5 -2.6262 1.70633 2
 10 0 -5 -0.7371 1.6249 2
 8 0 -5 -0.8646 1.58974 2
 8 0 -5 0.65638 1.07169 6
 -8 0 5 -2.1146 1.6512 2
 6 0 -5 0.69635 1.52875 2
 -6 0 5 0.7693 1.67429 2
 4 0 -5 -0.1081 1.34663 2
 -4 0 5 0.53569 1.46859 2
 -2 0 5 -1.2195 1.46956 2
 2 0 -5 -0.7242 1.44125 2
 2 0 -5 -0.778 1.36384 4
 -2 0 5 -0.0681 1.4176 4
 0 0 5 0.16575 1.63205 2
 0 0 -5 -1.788 1.486 4
 0 0 -5 -0.247 1.43989 2
 2 0 5 0.46167 1.47048 2
 -2 0 -5 1.46917 1.56106 2
 4 0 5 -3.1901 1.77784 2
 -4 0 -5 0.34708 1.62266 2
 -6 0 -5 -2.9624 1.86403 2
 6 0 5 0.89812 2.05171 5
 8 0 5 -1.2879 2.22192 5
 10 0 5 0.32507 2.39019 5
 10 0 5 -3.724 2.22875 2
 12 0 5 0.30429 2.52564 2
 -12 0 -5 -1.4994 2.58951 2
 12 0 5 -1.6472 2.6704 5
 18 0 5 3.3902 3.71061 2
 18 0 5 -1.8851 3.29831 2
 20 0 5 -5.2307 3.37936 2
 20 0 5 -0.6002 3.58894 2
 22 0 5 -7.8384 3.81568 2
 22 0 5 -7.6111 4.04374 2
 24 0 5 -2.876 4.50977 2
 31 -1 -5 16.8758 5.73254 2
 -31 1 5 14.2113 7.70994 5
 29 -1 -5 84.9376 8.09081 2
 -29 1 5 49.3363 8.99575 5
 29 1 -5 66.769 7.71276 2
 29 1 -5 71.3181 7.59129 2
 27 -1 -5 30.5899 4.96457 2
 27 -1 -5 30.9028 5.16418 2
 -27 -1 5 32.0756 5.6867 5
 27 1 -5 26.1793 4.59383 2
 -27 1 5 34.2327 6.64863 5
 -25 -1 5 75.881 6.93742 5
 25 -1 -5 72.0507 6.93492 2
 25 -1 -5 79.0292 6.89784 2
 -25 1 5 70.114 7.95353 5
 25 1 -5 65.1865 6.82983 2
 23 -1 -5 4.33201 3.8819 2
 -23 -1 5 14.6393 4.61888 5
 23 -1 -5 10.3519 3.85258 2
 23 1 -5 11.4599 3.50504 2
 -23 1 5 14.3763 5.31012 5
 23 1 -5 12.4561 3.82654 2
 21 -1 -5 124.371 7.17481 2
 21 -1 -5 137.436 7.27149 2
 21 1 -5 121.267 7.44209 2
 -21 1 5 119.268 8.64582 5
 21 1 -5 138.015 7.42319 2
 -21 1 5 132.6 7.51048 2
 19 -1 -5 326.366 12.8006 2
 19 1 -5 332.077 12.9302 2
 -19 1 5 341.829 13.0836 2
 19 1 -5 332.809 12.9548 2
 17 -1 -5 12.6688 2.59951 2
 17 1 -5 10.2294 2.64705 2
 -17 1 5 12.3187 3.01892 2
 17 1 -5 14.9723 2.89055 2
 -15 -1 5 1150.49 39.4803 2
 15 -1 -5 1158.13 39.477 2
 -15 1 5 1182.9 39.5814 2
 15 1 -5 1143.56 39.4616 2
 15 1 -5 1179.34 39.5319 2
 -13 -1 5 341.314 12.2453 2
 13 -1 -5 330.217 12.2094 2
 13 -1 -5 323.317 13.4905 6
 -13 1 5 331.336 12.3445 2
 13 1 -5 344.329 12.2465 2
 11 -1 -5 25.1682 2.89465 6
 11 -1 -5 26.8411 3.06427 2
 -11 -1 5 25.1179 3.14883 2
 -11 1 5 18.7407 3.17935 2
 11 1 -5 27.1924 3.08525 2
 9 -1 -5 173.241 6.85042 2
 9 -1 -5 184.852 7.59846 6
 -9 -1 5 171.722 6.82162 2
 -9 1 5 174.94 7.51221 6
 9 1 -5 176.625 6.82841 2
 -9 1 5 179.537 6.95461 2
 7 -1 -5 481.219 16.2022 2
 -7 -1 5 462.508 16.0823 2
 -7 1 5 467.609 18.2735 6
 7 1 -5 482.749 17.9572 6
 -7 1 5 467.446 16.2118 2
 7 1 -5 456.344 16.0931 2
 -5 -1 5 2296.17 88.1147 6
 5 -1 -5 2395.72 77.1774 2
 -5 -1 5 2242.67 77.0415 2
 -5 1 5 2390.99 77.1486 2
 5 1 -5 2273.33 77.5604 2
 3 -1 -5 1017.88 33.4927 2
 -3 -1 5 1013.13 33.1887 2
 3 1 -5 984.815 36.5534 1
 3 1 -5 980.943 33.162 2
 3 1 -5 991.157 34.3454 3
 -3 1 5 984.167 33.4322 2
 -1 -1 5 550.186 18.7595 3
 -1 -1 5 521.558 18.0515 2
 -1 -1 5 528.179 18.5552 4
 -1 -1 5 540.189 19.9904 1
 1 -1 -5 544.814 18.4249 2
 1 1 -5 547.345 18.5238 4
 1 1 -5 534.169 18.7439 3
 1 1 -5 530.656 18.0526 2
 -1 1 5 525.713 18.3677 2
 -1 1 5 541.348 19.7533 1
 -1 -1 -5 1196.25 39.5164 2
 1 -1 5 1284.84 40.4462 3
 1 -1 5 1131.1 39.6929 4
 1 -1 5 1167.44 39.1812 2
 -1 1 -5 1170.75 39.698 4
 1 1 5 1170.44 39.4639 2
 -1 1 -5 1108.28 39.169 2
 3 -1 5 68.6037 4.33081 5
 3 -1 5 70.2029 3.32055 3
 3 -1 5 66.0128 3.44278 2
 -3 -1 -5 70.7353 3.91555 2
 3 1 5 66.3715 3.7856 2
 -3 1 -5 69.1359 3.90491 4
 -3 1 -5 67.1702 3.35851 2
 5 -1 5 17.7198 2.15923 2
 -5 -1 -5 19.3894 2.46645 2
 5 -1 5 23.1461 2.83859 5
 -5 1 -5 12.3868 2.47442 4
 -5 1 -5 18.0908 2.13882 2
 5 1 5 15.2412 2.5811 2
 7 -1 5 227.087 9.02794 2
 7 -1 5 253.733 10.2365 5
 -7 -1 -5 233.116 9.40792 2
 7 1 5 250.067 9.51001 5
 7 1 5 229.267 9.32214 2
 -7 1 -5 235.953 9.12207 2
 9 -1 5 115.875 6.14829 5
 9 -1 5 96.6624 5.49897 2
 -9 -1 -5 110.017 5.80975 2
 -9 1 -5 98.5265 5.45777 2
 9 1 5 105.388 5.87212 2
 9 1 5 116.344 5.28566 5
 11 -1 5 60.3149 5.27392 5
 -11 -1 -5 63.3303 5.25783 2
 11 -1 5 67.1391 4.48526 2
 11 -1 5 55.83 4.76035 2
 11 1 5 60.1912 4.41142 5
 11 1 5 65.271 5.13408 2
 -11 1 -5 60.4063 4.78189 2
 13 -1 5 2.05485 2.77338 2
 -13 -1 -5 8.05158 3.18526 2
 13 -1 5 7.66196 3.44717 5
 13 -1 5 6.40624 2.85797 2
 13 1 5 9.28966 2.94578 2
 15 -1 5 74.7728 6.35396 2
 -15 -1 -5 77.843 6.77877 2
 15 1 5 79.825 6.40874 2
 17 -1 5 6.45659 3.62738 2
 -17 -1 -5 10.9297 4.50423 2
 17 -1 5 8.51665 3.87977 2
 17 1 5 11.5968 3.80558 2
 17 1 5 15.4027 3.71525 2
 19 -1 5 -3.8404 3.62548 2
 19 -1 5 -5.9813 3.72111 2
 19 1 5 -2.1029 3.46072 2
 21 -1 5 26.7146 4.9161 2
 21 -1 5 17.2112 4.5968 2
 21 1 5 18.393 4.4381 2
 23 -1 5 4.95802 4.77398 2
 30 -2 -5 7.09353 5.6686 2
 30 -2 -5 20.2894 8.94567 6
 30 -2 -5 6.75363 5.35431 2
 30 2 -5 21.1727 5.32017 2
 28 -2 -5 17.993 4.95287 2
 28 -2 -5 20.6448 7.35374 6
 28 -2 -5 21.197 4.96957 2
 28 2 -5 15.1044 4.16963 2
 -28 2 5 13.6971 7.11802 5
 26 -2 -5 -4.4447 4.02642 2
 26 -2 -5 -1.3147 4.14108 2
 26 2 -5 0.31944 4.20441 2
 24 -2 -5 -5.6304 3.64713 2
 24 -2 -5 -1.5247 3.64904 2
 24 -2 -5 3.49911 5.19519 6
 -24 -2 5 -0.5645 4.22948 5
 -24 2 5 -8.9698 4.45884 2
 24 2 -5 -0.4512 3.69724 2
 -24 2 5 -2.4303 5.51117 5
 22 -2 -5 5.69522 4.60009 6
 22 -2 -5 -5.7338 3.60397 2
 22 2 -5 -2.1711 3.49733 2
 22 2 -5 -3.0397 3.30551 2
 -22 2 5 2.93438 4.16981 2
 20 -2 -5 -2.571 3.48141 6
 20 2 -5 -1.1887 3.14632 2
 20 2 -5 -1.6819 2.89189 2
 -20 2 5 -1.8662 3.42435 2
 18 -2 -5 2.77778 3.27487 6
 18 -2 -5 0.086 2.53575 2
 -18 2 5 1.28066 3.08086 2
 18 2 -5 5.54009 2.84346 2
 18 2 -5 -0.2599 2.65906 2
 16 -2 -5 67.3496 4.73863 2
 16 -2 -5 67.6166 5.09822 6
 16 2 -5 74.1284 5.13413 2
 16 2 -5 66.3314 5.04243 2
 -16 2 5 60.1116 4.97061 2
 14 -2 -5 39.2276 3.91211 2
 14 -2 -5 39.1739 4.2315 6
 14 2 -5 44.8689 4.18934 2
 14 2 -5 45.0064 4.08257 2
 -14 2 5 28.0712 4.02065 2
 12 -2 -5 108.216 5.92854 6
 12 -2 -5 102.25 5.18108 2
 -12 2 5 96.7812 5.37259 2
 12 2 -5 108.974 5.21819 2
 12 2 -5 114.458 5.35284 2
 10 -2 -5 464.796 16.1143 2
 10 -2 -5 465.543 18.4065 6
 10 2 -5 437.165 15.9562 2
 -10 2 5 454.848 18.4245 6
 -10 2 5 465.467 16.151 2
 10 2 -5 464.913 16.0304 2
 8 -2 -5 127.676 5.21928 2
 -8 -2 5 115.611 4.96089 2
 8 2 -5 110.959 4.94373 2
 8 2 -5 123.836 5.07973 2
 -8 2 5 121.888 5.2557 2
 8 2 -5 124.051 5.55583 3
 8 2 -5 124.224 5.5823 6
 -8 2 5 113.245 6.07255 6
 6 -2 -5 123.652 5.11363 2
 -6 -2 5 117.497 4.68098 2
 6 2 -5 98.3609 6.00549 1
 6 2 -5 121.356 5.46634 3
 -6 2 5 123.785 5.23815 2
 6 2 -5 120.391 4.77484 2
 -6 2 5 120.291 6.12228 6
 6 2 -5 124.5 5.61874 6
 -4 -2 5 37.6024 3.69385 3
 -4 -2 5 52.1944 2.441 2
 4 -2 -5 51.7273 3.25982 2
 -4 -2 5 46.8894 3.73288 6
 4 2 -5 43.0017 4.03049 1
 4 2 -5 58.1646 3.71724 3
 -4 2 5 55.569 3.40145 2
 -2 -2 5 22.5117 3.26697 1
 2 -2 -5 27.4436 2.91901 2
 2 -2 -5 15.2266 3.0736 1
 -2 -2 5 15.7693 2.99844 3
 2 2 -5 26.8734 2.85443 3
 2 2 -5 19.8219 3.19046 1
 0 -2 5 3.83086 1.92161 3
 0 -2 -5 2.84333 1.86792 2
 0 -2 5 3.67356 2.39216 1
 0 -2 5 2.41585 2.44056 5
 0 -2 5 2.50009 1.94453 4
 0 2 5 4.2225 2.01896 2
 0 2 5 4.02667 2.09154 1
 -2 -2 -5 47.8567 3.71453 2
 2 -2 5 44.21 3.40172 3
 2 -2 5 43.732 4.0997 5
 2 -2 5 49.6277 3.83525 4
 2 -2 5 40.3777 2.22553 2
 -2 2 -5 48.5167 3.70334 4
 2 2 5 41.5243 3.50383 2
 -2 2 -5 37.0147 2.32164 2
 2 2 5 43.1518 3.34975 1
 4 -2 5 261.74 11.0887 5
 4 -2 5 260.98 9.93637 3
 4 -2 5 244.869 9.14531 2
 -4 -2 -5 261.632 9.51804 3
 -4 -2 -5 259.766 9.98288 2
 4 -2 5 272.974 9.17786 2
 -4 2 -5 267.246 10.056 4
 4 2 5 258.796 9.87978 2
 -4 2 -5 246.147 9.21649 2
 6 -2 5 18.2265 2.16682 2
 6 -2 5 21.6756 2.64194 2
 -6 -2 -5 17.2748 2.74523 2
 6 -2 5 26.2458 3.47057 5
 6 2 5 25.0185 4.0275 2
 -6 2 -5 18.1116 2.84994 4
 8 -2 5 15.0711 3.28906 5
 -8 -2 -5 7.9708 2.72393 2
 8 -2 5 13.7649 2.11877 2
 8 -2 5 10.7631 2.20457 2
 8 2 5 14.8599 2.26339 5
 -8 2 -5 10.5778 2.72451 4
 8 2 5 8.49678 2.97733 2
 10 -2 5 22.3278 3.6384 2
 10 -2 5 31.0354 5.03042 5
 10 -2 5 26.9749 3.53829 2
 -10 -2 -5 26.9936 4.65032 2
 10 2 5 28.4573 2.79645 5
 10 2 5 30.0557 3.55596 2
 -10 2 -5 31.6455 4.77369 4
 12 -2 5 166.036 8.9278 5
 -12 -2 -5 162.002 8.39773 2
 12 -2 5 153.887 7.1616 2
 12 -2 5 161.261 7.39616 2
 -12 2 -5 163.124 8.48964 4
 12 2 5 150.667 8.0234 2
 14 -2 5 55.5354 5.44982 2
 -14 -2 -5 55.4511 6.37312 2
 14 -2 5 48.3879 5.20733 2
 14 2 5 58.9303 6.3076 2
 -16 -2 -5 9.10665 3.84151 2
 16 -2 5 7.30941 3.42888 2
 18 -2 5 104.837 8.24643 2
 -18 -2 -5 99.3708 8.45281 2
 18 -2 5 112.884 7.57539 2
 18 2 5 85.172 7.95293 2
 18 2 5 110.919 7.93268 2
 20 -2 5 9.17733 4.31502 2
 -20 -2 -5 -5.8145 4.62065 2
 20 2 5 -1.1533 3.40613 2
 20 2 5 -1.6789 3.92499 2
 22 -2 5 -2.9222 4.62429 2
 22 -2 5 -2.0543 4.81036 2
 22 2 5 -3.3311 4.34608 2
 29 -3 -5 -0.752 5.71629 2
 29 -3 -5 18.0966 8.6601 6
 29 3 -5 2.6144 4.70001 2
 29 3 -5 -2.6965 6.25346 3
 27 -3 -5 1.93858 4.79346 2
 27 -3 -5 -1.862 5.05345 2
 27 -3 -5 13.94 7.14869 6
 27 3 -5 -1.4945 5.44507 3
 27 3 -5 3.39002 4.10375 2
 25 -3 -5 -0.1921 4.34229 2
 25 -3 -5 5.58035 4.54368 2
 25 -3 -5 3.67748 6.39953 6
 25 3 -5 3.43897 4.18107 2
 25 3 -5 -2.6258 4.4404 3
 23 -3 -5 52.5221 6.69064 2
 23 -3 -5 46.9477 7.93604 6
 23 -3 -5 42.0071 6.35752 2
 23 3 -5 45.2565 7.11758 2
 23 3 -5 39.9322 5.21763 3
 -23 3 5 43.9906 6.99575 5
 -23 3 5 42.0383 6.97963 2
 21 -3 -5 28.5993 4.35309 2
 21 -3 -5 35.7688 7.03926 6
 21 3 -5 42.5156 5.72266 3
 21 3 -5 37.7309 4.50078 2
 -21 3 5 35.2276 6.69581 5
 -21 3 5 38.1508 4.92619 2
 19 -3 -5 69.7889 6.38133 2
 19 -3 -5 91.7619 7.38207 6
 19 3 -5 95.1308 6.58351 2
 -19 3 5 78.617 8.11119 5
 -19 3 5 87.9712 6.83735 2
 19 3 -5 92.1782 5.94097 3
 17 -3 -5 116.469 7.4543 6
 17 -3 -5 116.516 6.42187 2
 17 3 -5 117.576 6.37697 3
 17 3 -5 119.453 6.74159 2
 -17 3 5 113.167 6.62287 2
 -17 3 5 112.324 8.51396 5
 17 3 -5 111.465 6.72616 2
 15 -3 -5 65.014 4.87705 2
 15 -3 -5 66.0903 5.76704 6
 -15 3 5 64.8732 4.93594 2
 15 3 -5 60.601 5.09132 2
 15 3 -5 67.5965 4.81194 3
 15 3 -5 67.496 5.19107 2
 13 -3 -5 -3.3167 3.23133 6
 13 -3 -5 -3.0105 2.2178 2
 13 3 -5 -3.2935 2.31944 2
 13 3 -5 -1.5923 2.36381 2
 13 3 -5 0.4505 2.57425 3
 11 -3 -5 18.5289 2.40491 2
 -11 3 5 17.3499 3.08504 4
 11 3 -5 20.45 3.50686 2
 -11 3 5 22.9964 3.90617 6
 11 3 -5 16.295 2.85761 3
 -11 3 5 19.4002 2.6135 2
 11 3 -5 20.1687 2.59301 2
 9 -3 -5 1.68172 1.86179 2
 9 3 -5 -0.9313 2.43729 3
 -9 3 5 2.19843 1.64895 4
 9 3 -5 -2.6963 1.88122 2
 -9 3 5 1.03007 1.92496 2
 9 3 -5 -1.5593 1.96437 2
 9 3 -5 -1.6395 2.68582 6
 -9 3 5 -5.15 3.09988 6
 7 -3 -5 38.1103 3.23907 2
 7 3 -5 35.4788 2.89065 2
 7 3 -5 37.4735 4.33149 1
 7 3 -5 36.0613 2.91897 2
 -7 3 5 33.7237 3.40959 2
 -7 3 5 26.5572 4.719 6
 7 3 -5 36.5754 3.91879 3
 7 3 -5 28.9637 4.09962 6
 5 -3 -5 54.1515 3.66095 2
 -5 -3 5 45.5969 4.14436 3
 5 3 -5 49.7801 2.84 2
 5 3 -5 52.5999 4.66404 1
 5 3 -5 51.2435 4.55767 6
 5 3 -5 50.4045 4.17053 3
 -5 3 5 51.6139 3.73176 2
 -5 3 5 43.0134 5.1167 6
 5 3 -5 44.5625 2.8567 2
 -3 -3 5 21.9326 3.90139 6
 -3 -3 5 22.2885 4.18096 1
 -3 -3 5 23.8617 3.92397 3
 3 -3 -5 23.7061 3.62586 1
 -3 -3 5 28.9309 3.84041 5
 3 -3 -5 34.2809 3.23697 2
 -3 3 5 33.7749 3.37966 2
 3 3 -5 36.2846 4.28883 1
 3 3 -5 33.7036 3.79863 3
 -1 -3 5 282.734 10.8146 3
 -1 -3 5 281.767 12.0084 6
 1 -3 -5 282.456 10.5171 2
 -1 -3 5 266.741 11.7872 1
 -1 -3 5 274.691 11.4988 5
 1 -3 -5 266.85 11.5243 1
 -1 -3 5 290.855 10.75 4
 -1 3 5 270.406 10.3985 2
 1 -3 5 235.783 11.0495 1
 1 -3 5 255.547 10.2311 4
 1 -3 5 272.448 10.2987 3
 -1 -3 -5 257.957 9.99295 2
 1 -3 5 256.565 11.1306 5
 1 -3 5 259.048 11.5857 6
 1 3 5 262.314 10.0531 2
 1 3 5 268.486 10.8325 1
 3 -3 5 331.339 12.5912 4
 -3 -3 -5 333.822 12.4251 3
 3 -3 5 335.2 14.4416 6
 3 -3 5 318.829 13.7063 5
 -3 -3 -5 324.245 12.4436 2
 3 -3 5 343.283 12.6979 3
 -3 3 -5 333.47 12.5517 4
 3 3 5 327.781 12.3542 2
 3 3 5 329.586 13.3545 1
 5 -3 5 -1.5896 1.47991 2
 -5 -3 -5 2.2861 2.58427 2
 5 -3 5 1.82307 3.07094 5
 5 -3 5 0.0926 1.39667 2
 -5 3 -5 4.60164 2.41523 4
 5 3 5 -1.3936 3.02721 1
 5 3 5 4.86999 2.47698 2
 7 -3 5 11.9502 1.95582 2
 -7 -3 -5 10.7629 3.05813 2
 -7 -3 -5 12.6835 2.30357 3
 7 -3 5 12.4602 3.66507 5
 7 -3 5 9.02459 1.90781 2
 7 3 5 9.90532 2.8949 2
 -7 3 -5 13.0251 2.82251 4
 9 -3 5 2.61307 2.1288 2
 -9 -3 -5 1.77452 3.02734 2
 9 -3 5 6.35756 3.66562 5
 9 -3 5 3.56055 2.08712 2
 9 3 5 1.62819 2.99742 2
 -9 3 -5 1.44218 2.7955 4
 11 -3 5 68.836 6.68916 5
 11 -3 5 60.8245 4.82661 2
 -11 -3 -5 60.7327 6.28424 2
 11 -3 5 68.4858 4.60644 2
 -11 3 -5 61.484 5.91223 4
 11 3 5 64.9497 6.41525 2
 -13 -3 -5 23.1348 4.5103 2
 13 -3 5 23.2748 3.55185 2
 13 -3 5 24.0548 3.36127 2
 -13 3 -5 17.086 4.09068 4
 -15 -3 -5 16.9415 4.40876 2
 15 -3 5 15.029 3.75791 2
 15 -3 5 15.142 3.56701 2
 -15 3 -5 13.6373 4.24861 4
 15 3 5 26.6347 4.90666 2
 -17 -3 -5 -6.9278 4.33116 2
 17 -3 5 -4.8124 3.9014 2
 17 -3 5 -2.3384 3.62981 2
 -17 3 -5 -6.2202 4.24778 4
 -19 -3 -5 -1.5738 4.86493 2
 19 -3 5 2.96258 4.22714 2
 19 3 5 3.91698 4.16077 2
 19 3 5 -1.3503 4.06321 2
 -21 -3 -5 -0.3606 5.17017 2
 21 -3 5 3.51606 4.67645 2
 21 -3 5 9.01921 5.4044 2
 28 -4 -5 19.9436 6.45804 2
 28 -4 -5 17.5407 6.59756 2
 28 4 -5 27.3315 5.48777 2
 -28 4 5 11.3892 7.84468 5
 26 -4 -5 16.5916 8.55452 6
 26 -4 -5 6.47703 5.64461 2
 26 4 -5 5.4418 4.43971 2
 26 4 -5 4.80465 5.89665 3
 -26 4 5 -5.8593 7.10805 5
 24 -4 -5 8.59934 7.28234 6
 24 -4 -5 -0.0641 4.733 2
 24 -4 -5 -0.153 4.85674 2
 -24 4 5 -4.6927 5.61525 2
 24 4 -5 8.83677 4.78618 2
 24 4 -5 -0.3262 4.87824 3
 22 -4 -5 20.8666 4.91901 2
 22 -4 -5 32.0417 6.89909 6
 22 4 -5 19.6721 4.91304 3
 22 4 -5 21.9411 5.08131 2
 -22 4 5 11.4424 5.67944 4
 -22 4 5 18.1336 5.44611 2
 20 -4 -5 9.11402 5.8022 6
 -20 4 5 -2.6546 4.6859 2
 -20 4 5 -2.2369 4.44876 4
 20 4 -5 -0.1693 3.86619 2
 20 4 -5 6.59768 4.06563 3
 18 -4 -5 27.9098 5.36506 6
 18 -4 -5 7.91064 3.99485 2
 18 4 -5 14.9715 4.01643 2
 18 4 -5 17.9652 4.3183 2
 -18 4 5 20.0008 6.27824 5
 -18 4 5 12.6962 4.30885 2
 18 4 -5 23.8647 4.0562 3
 -18 4 5 17.3878 4.11537 4
 16 -4 -5 64.7862 6.89133 6
 16 -4 -5 64.6407 5.40294 2
 16 4 -5 63.3249 5.88745 2
 16 4 -5 71.78 5.79746 3
 -16 4 5 72.3797 5.80512 4
 -16 4 5 62.3013 7.93257 5
 -16 4 5 64.1958 5.59177 2
 14 -4 -5 4.00213 2.66014 2
 14 -4 -5 7.42857 4.3674 6
 -14 4 5 -1.5185 4.64727 5
 14 4 -5 0.56913 3.17484 2
 14 4 -5 1.67585 3.03322 2
 -14 4 5 9.95975 2.83085 4
 14 4 -5 7.96772 3.13223 3
 -14 4 5 3.89849 3.00068 2
 12 -4 -5 163.392 9.11958 6
 -12 -4 5 167.765 7.36609 5
 -12 4 5 156.328 7.05783 4
 -12 4 5 154.15 9.45086 5
 12 4 -5 154.28 7.89882 3
 12 4 -5 161.143 7.41725 2
 12 4 -5 156.152 7.46681 2
 -12 4 5 165.234 7.49081 2
 -12 4 5 170.991 9.07722 6
 12 4 -5 166.064 8.70461 1
 10 -4 -5 431.698 15.9402 2
 -10 -4 5 468.95 17.4292 5
 -10 4 5 434.467 19.0298 6
 10 4 -5 456.461 18.2505 1
 10 4 -5 443.35 16.1262 2
 -10 4 5 461.223 16.1934 2
 10 4 -5 448.815 16.028 2
 10 4 -5 445.701 17.0273 3
 10 4 -5 449.989 18.5849 6
 -8 -4 5 107.403 5.9554 3
 -8 -4 5 103.221 5.601 5
 -8 4 5 80.1048 7.1219 6
 -8 4 5 97.2832 5.25853 2
 8 4 -5 96.0993 6.38765 1
 8 4 -5 91.4221 6.41338 6
 8 4 -5 93.5915 4.91596 2
 8 4 -5 97.5098 5.7614 3
 8 4 -5 99.0523 4.98346 2
 -6 -4 5 247.36 10.1703 3
 6 -4 -5 240.278 9.38042 2
 -6 -4 5 243.37 10.3448 5
 6 -4 -5 209.101 8.95828 4
 6 -4 -5 221.936 10.8599 1
 6 4 -5 255.788 11.1297 6
 -6 4 5 246.101 9.31904 2
 6 4 -5 251.106 10.8937 1
 -6 4 5 239.681 11.8015 6
 6 4 -5 242.3 9.97606 3
 6 4 -5 225.288 8.74267 2
 -4 -4 5 514.993 21.3143 1
 4 -4 -5 521.273 21.1569 1
 -4 -4 5 544.514 19.89 3
 4 -4 -5 524.984 18.7976 2
 -4 -4 5 515.191 20.7361 5
 4 -4 -5 516.086 18.4921 4
 -4 4 5 545.196 18.8768 2
 -4 4 5 561.317 22.4553 6
 4 4 -5 556.765 21.9158 6
 4 4 -5 541.723 21.0298 1
 -2 -4 5 259.489 12.6689 1
 -2 -4 5 284.461 11.6779 3
 2 -4 -5 261.454 12.4495 1
 2 -4 -5 298.903 10.9406 2
 -2 -4 5 288.011 12.7928 6
 -2 -4 5 299.573 12.2596 5
 -2 -4 5 291.112 11.351 4
 0 -4 5 466.654 16.8393 4
 0 -4 -5 460.618 16.4511 2
 0 -4 5 428.773 18.6586 1
 0 -4 5 461.342 18.2134 5
 0 -4 -5 418.969 18.2403 1
 0 -4 5 462.427 19.0805 6
 0 -4 5 467.615 17.2726 3
 0 4 5 474.239 16.584 2
 2 -4 5 1.49702 3.05467 4
 -2 -4 -5 9.55007 2.82351 2
 2 -4 5 0.63789 3.40299 5
 2 -4 5 0.51321 2.9267 3
 2 -4 5 12.8305 4.36964 6
 2 4 5 10.3435 2.90762 2
 2 4 5 5.34394 3.3731 1
 -4 -4 -5 2.402 2.75674 2
 4 -4 5 -2.546 3.67645 5
 4 -4 5 0.64892 3.11357 4
 4 -4 5 -0.1754 4.18348 6
 4 -4 5 -1.5171 2.80373 3
 -4 -4 -5 -5.6216 2.76015 3
 4 4 5 0.49483 2.73216 2
 4 4 5 1.75183 3.49378 1
 -6 -4 -5 72.674 5.54881 3
 -6 -4 -5 94.8291 6.34542 2
 6 -4 5 92.0885 7.04443 5
 6 -4 5 83.1179 7.46621 6
 6 -4 5 84.5493 6.09907 3
 6 4 5 90.0241 6.096 2
 -6 4 -5 88.2757 6.20815 4
 6 4 5 91.3744 6.40361 1
 -8 -4 -5 36.7464 4.39953 3
 8 -4 5 44.0515 3.41324 2
 -8 -4 -5 34.531 5.93127 2
 8 -4 5 53.1516 6.81511 6
 8 -4 5 42.931 6.65134 5
 -8 4 -5 43.2294 5.47055 4
 8 4 5 38.6054 5.48751 1
 8 4 5 41.269 5.53595 2
 10 -4 5 44.1625 6.93675 5
 10 -4 5 42.054 6.72411 6
 -10 -4 -5 38.5741 6.45909 2
 10 -4 5 41.3175 4.00383 2
 10 4 5 31.0347 4.43938 2
 10 4 5 33.7286 5.92728 1
 -10 4 -5 31.4724 4.33284 4
 12 -4 5 46.869 7.30228 6
 12 -4 5 44.5153 5.10084 2
 -12 -4 -5 34.212 5.32252 2
 -12 4 -5 37.8563 6.4559 4
 14 -4 5 41.5047 7.65443 6
 14 -4 5 27.0674 4.27007 2
 -14 -4 -5 35.0792 5.49119 2
 -14 4 -5 28.146 4.88524 4
 -16 -4 -5 -2.4824 4.40387 2
 -16 4 -5 2.54904 4.26095 4
 18 -4 5 19.5959 5.40361 2
 -18 4 -5 32.6875 5.52041 4
 20 -4 5 11.6458 5.82125 2
 20 4 5 9.65346 4.85759 2
 -20 4 -5 15.1256 5.38389 4
 20 4 5 12.7821 4.7824 2
 25 -5 -5 -2.0219 8.14145 6
 25 -5 -5 -5.0719 5.70295 2
 -25 5 5 -6.785 6.38295 2
 25 5 -5 7.03265 5.43606 2
 23 -5 -5 8.3672 7.68142 6
 23 5 -5 23.3071 5.88469 2
 -23 5 5 6.51025 5.71769 2
 23 5 -5 17.2212 5.72742 3
 -23 5 5 12.9926 6.09896 4
 21 -5 -5 22.8739 6.85601 6
 -21 5 5 17.3051 5.62364 4
 -21 5 5 8.58894 6.68486 5
 19 -5 -5 33.1869 8.16018 6
 -19 5 5 51.4575 9.36316 5
 -19 5 5 44.8346 7.55602 4
 19 5 -5 58.8084 7.41507 2
 19 5 -5 52.0318 7.31657 3
 17 -5 -5 0.04915 5.96818 6
 17 5 -5 24.0192 5.54402 1
 17 5 -5 11.8537 4.5815 3
 -17 5 5 11.2611 4.31536 4
 17 5 -5 12.8639 4.50222 2
 -17 5 5 5.87589 4.29471 2
 -17 5 5 6.70536 6.28755 5
 15 -5 -5 3.15329 5.52718 6
 15 5 -5 0.04277 4.08683 2
 15 5 -5 -0.101 4.65262 1
 -15 5 5 -4.3704 5.48962 5
 15 5 -5 -0.665 3.73173 3
 -15 5 5 -0.1396 3.5918 4
 -13 -5 5 3.81626 3.29664 5
 13 5 -5 9.03609 4.65255 1
 -13 5 5 3.6253 5.70916 5
 13 5 -5 -0.6227 3.50055 2
 13 5 -5 4.3333 3.66135 3
 -13 5 5 -2.631 3.24944 2
 13 5 -5 -0.5606 5.0145 6
 -11 -5 5 4.11901 3.46863 5
 -11 5 5 -1.2218 5.39653 6
 11 5 -5 -4.4781 3.09119 2
 11 5 -5 4.58082 4.67459 6
 -11 5 5 -6.905 4.96916 5
 -11 5 5 1.7576 3.30921 2
 11 5 -5 2.18951 3.52083 3
 11 5 -5 6.95621 4.59144 1
 9 -5 -5 12.0297 4.54634 1
 -9 -5 5 12.2494 3.71313 5
 -9 -5 5 9.4243 3.76816 3
 -9 5 5 6.11351 5.0844 6
 9 5 -5 7.30988 2.96282 2
 -9 5 5 7.53431 4.75572 5
 -9 5 5 7.42076 2.87954 2
 9 5 -5 15.3902 4.57905 1
 9 5 -5 11.2193 4.69169 6
 -7 -5 5 34.9984 5.30345 3
 7 -5 -5 29.3069 4.43234 2
 7 -5 -5 29.3746 5.70537 1
 -7 -5 5 36.5074 5.28926 5
 7 5 -5 28.6689 3.84663 2
 7 5 -5 32.377 6.00658 6
 7 5 -5 30.0318 5.56941 1
 -7 5 5 37.1866 5.12123 5
 -7 5 5 29.8882 4.55896 2
 -7 5 5 27.5834 6.10719 6
 5 -5 -5 8.16531 2.88987 4
 5 -5 -5 10.9296 4.5035 1
 -5 -5 5 12.5247 4.00427 3
 -5 -5 5 13.2877 3.9303 5
 5 5 -5 18.3216 4.24388 1
 5 5 -5 17.1933 4.69122 6
 -5 5 5 15.601 4.24253 5
 5 5 -5 11.4229 2.17174 2
 -5 5 5 15.1146 2.89276 2
 -5 5 5 11.0806 5.73052 6
 3 -5 -5 -0.4989 4.31559 1
 -3 -5 5 -0.822 4.35356 1
 -3 -5 5 3.9408 3.68408 3
 -3 -5 5 6.81127 3.95873 5
 3 5 -5 8.07591 4.57441 6
 -3 5 5 2.97578 5.06984 6
 -1 -5 5 6.75708 3.26776 4
 -1 -5 5 8.03235 3.99075 5
 1 -5 -5 -3.2702 4.56638 1
 -1 -5 5 -0.257 3.50784 3
 -1 5 5 13.2594 3.10959 2
 -1 5 5 5.98551 3.38424 5
 1 -5 5 7.33574 4.72345 6
 -1 -5 -5 13.2905 3.50212 2
 1 -5 5 9.20215 3.63321 4
 1 -5 5 -0.9852 3.53581 3
 -1 -5 -5 -2.4291 3.62425 3
 1 -5 5 4.99641 4.13734 5
 1 5 5 1.02519 3.01835 5
 -3 -5 -5 7.29252 3.77219 3
 3 -5 5 22.2297 5.52874 6
 -3 -5 -5 20.8593 3.72811 2
 3 -5 5 11.6738 3.88558 3
 3 -5 5 16.3158 5.10115 1
 3 -5 5 31.2526 5.98002 5
 3 -5 5 33.6735 5.74725 4
 3 5 5 18.4576 3.66799 5
 3 5 5 14.2287 4.38592 1
 5 -5 5 13.2573 4.30512 4
 -5 -5 -5 15.0621 4.05592 2
 -5 -5 -5 4.13384 3.85277 3
 5 -5 5 17.0673 5.62126 6
 5 -5 5 7.28786 3.85164 3
 5 5 5 8.8333 3.7033 2
 5 5 5 7.90579 4.44323 1
 -7 -5 -5 17.701 4.4934 2
 -7 -5 -5 10.5532 4.18678 3
 7 5 5 13.7264 3.9941 2
 7 5 5 23.3176 5.07667 1
 9 -5 5 30.4479 6.85261 6
 -9 -5 -5 27.227 4.9477 2
 9 -5 5 24.8151 4.9545 3
 -9 -5 -5 30.6139 5.48528 3
 9 5 5 20.7267 4.4869 2
 -9 5 -5 21.7117 4.55606 4
 9 5 5 38.1339 6.45986 1
 -11 -5 -5 15.04 4.84473 2
 11 -5 5 9.70724 6.94243 6
 11 -5 5 19.0077 5.07387 3
 -11 5 -5 9.54627 4.34478 4
 11 5 5 16.4402 5.38104 1
 13 -5 5 -4.4675 6.5211 6
 -13 -5 -5 1.86874 4.90031 2
 13 5 5 3.30599 5.63018 1
 -13 5 -5 7.86532 4.59047 4
 -15 -5 -5 -1.9327 4.86007 2
 15 -5 5 -1.4238 6.40519 6
 15 5 5 -4.5412 5.98742 1
 -15 5 -5 5.01289 5.0871 4
 17 -5 5 4.72836 6.60657 6
 -17 -5 -5 -6.5115 4.93673 2
 17 5 5 -0.1496 6.86038 1
 -17 5 -5 3.96878 5.44972 4
 -19 -5 -5 0.45359 5.7444 2
 -19 5 -5 8.04749 6.14735 4
 19 5 5 11.5554 4.99257 2
 22 -6 -5 7.1352 9.27634 6
 22 6 -5 0.95424 5.61191 1
 22 6 -5 7.33142 6.66137 2
 -22 6 5 12.6459 7.69539 5
 -22 6 5 7.55359 7.17073 4
 20 6 -5 16.7113 5.94667 2
 -20 6 5 8.24353 6.38682 4
 -20 6 5 19.136 7.28798 5
 20 6 -5 17.1386 5.79998 1
 18 -6 -5 25.9462 8.02601 6
 18 6 -5 19.3384 5.86988 2
 18 6 -5 29.0921 5.88936 1
 16 6 -5 49.9894 6.26199 2
 16 6 -5 56.4119 7.72239 1
 -16 6 5 48.683 9.08542 5
 -16 6 5 39.5807 5.51804 2
 16 6 -5 51.2078 10.0028 6
 14 6 -5 36.726 6.28251 1
 -14 6 5 33.208 7.21615 5
 14 6 -5 30.6014 7.72709 6
 12 -6 -5 47.8706 6.95534 1
 12 6 -5 43.4612 7.28966 1
 -12 6 5 48.8407 8.2432 6
 12 6 -5 49.73 8.11445 6
 -12 6 5 46.4338 7.29032 5
 12 6 -5 41.7354 5.10178 2
 10 -6 -5 83.8215 7.44964 1
 -10 -6 5 71.6824 7.05309 3
 10 6 -5 79.7974 8.61637 6
 -10 6 5 90.1984 7.10212 2
 -10 6 5 58.2465 8.70658 6
 10 6 -5 81.2913 7.53167 1
 10 6 -5 70.8641 6.45036 2
 -10 6 5 76.431 9.18595 5
 -8 -6 5 35.5867 6.21852 3
 8 -6 -5 38.6631 6.66475 1
 -8 6 5 48.1596 5.75669 2
 8 6 -5 40.5441 6.59947 1
 8 6 -5 40.403 7.62273 6
 -8 6 5 35.0581 7.85528 6
 -8 6 5 41.2003 7.97086 5
 8 6 -5 34.6329 5.31026 2
 6 -6 -5 129.931 9.14327 1
 6 -6 -5 117.108 7.6223 4
 -6 -6 5 131.327 8.56266 3
 -6 -6 5 157.728 9.03367 5
 -6 6 5 122.122 10.9386 6
 6 6 -5 137.705 8.69576 1
 6 6 -5 133.062 9.71959 6
 -6 6 5 128.581 9.11103 5
 6 6 -5 119.645 6.65018 2
 -6 6 5 143.652 7.66476 2
 -4 -6 5 131.712 9.08157 5
 4 -6 -5 127.142 7.54758 2
 4 -6 -5 112.293 8.55007 1
 -4 -6 5 111.045 8.27937 3
 -4 6 5 113.56 10.1617 6
 4 6 -5 107.161 9.95172 6
 -4 6 5 105.923 7.96414 5
 -2 -6 5 38.0671 6.10434 5
 -2 -6 5 28.3821 4.82972 4
 -2 -6 5 25.3278 5.99398 1
 2 -6 -5 37.128 6.69951 1
 -2 -6 5 26.2366 5.0884 3
 2 -6 -5 22.0343 5.08535 3
 -2 6 5 28.2494 4.99064 5
 -2 6 5 27.6255 6.84032 6
 0 -6 -5 28.6001 5.23698 3
 0 -6 5 24.6661 5.27651 3
 0 -6 5 47.4023 6.55146 5
 0 -6 -5 49.6312 6.63766 2
 0 -6 5 43.9016 7.06523 4
 0 -6 5 29.295 5.94364 1
 0 6 5 39.7247 7.16493 6
 0 6 5 40.1843 5.76554 5
 2 -6 5 3.99989 4.30151 4
 -2 -6 -5 8.13283 4.58097 2
 2 -6 5 6.39643 5.96184 6
 2 -6 5 -9.3343 5.13232 1
 -2 -6 -5 -8.0723 4.20758 3
 2 -6 5 0.98768 5.43153 5
 2 6 5 3.57308 3.44885 5
 4 -6 5 5.57424 4.87872 4
 4 -6 5 -2.9201 4.8927 1
 -4 -6 -5 -8.9393 4.54424 3
 4 -6 5 0.96409 6.78248 6
 -4 -6 -5 9.8806 5.13648 2
 4 -6 5 -7.2341 4.45006 3
 4 6 5 0.74864 4.64745 1
 6 -6 5 32.5951 6.31085 1
 -6 -6 -5 29.2695 5.51706 3
 6 -6 5 20.1314 4.74208 3
 6 -6 5 34.3799 7.88434 6
 -6 -6 -5 34.2028 5.76843 2
 6 6 5 33.8186 5.73531 1
 -8 -6 -5 40.7493 7.4166 3
 8 -6 5 58.6153 7.75169 1
 8 -6 5 40.0111 7.81208 6
 -8 -6 -5 58.1118 8.58478 2
 8 -6 5 51.2566 7.24333 3
 8 6 5 41.7771 7.28708 1
 10 -6 5 47.2714 7.82628 1
 10 -6 5 66.6016 10.9168 6
 -10 -6 -5 46.0709 6.56168 2
 10 -6 5 55.6097 7.5201 3
 10 6 5 49.1675 8.23374 1
 12 -6 5 42.8192 9.5491 6
 12 -6 5 21.672 6.22207 3
 -12 -6 -5 19.3302 6.92836 2
 12 6 5 23.812 7.00331 1
 14 -6 5 15.1259 6.04354 3
 -14 -6 -5 14.3095 6.05497 2
 14 6 5 18.8493 7.50629 1
 16 -6 5 2.63729 6.73487 3
 -16 -6 -5 -4.1385 6.30325 2
 16 -6 5 22.8107 9.17994 6
 16 6 5 17.6091 8.1183 1
 -16 6 -5 6.41087 6.47079 4
 19 7 -5 19.4292 6.56702 1
 19 7 -5 20.0088 10.9456 6
 19 7 -5 5.84309 7.53307 2
 17 7 -5 46.4298 7.88299 2
 -17 7 5 57.4726 10.7371 5
 17 7 -5 41.4768 7.38178 1
 15 -7 -5 17.8372 6.03781 1
 -15 7 5 8.37786 5.51913 2
 15 7 -5 11.2288 9.06515 6
 15 7 -5 10.6285 6.52716 2
 15 7 -5 7.98255 6.04516 1
 13 -7 -5 13.953 5.72241 1
 13 7 -5 8.99569 8.50158 6
 13 7 -5 0.5327 5.79383 2
 -13 7 5 13.8701 7.48474 5
 13 7 -5 2.8985 5.56579 1
 11 -7 -5 20.0783 5.80155 1
 11 7 -5 8.09864 7.97701 6
 -11 7 5 22.9877 7.89491 6
 11 7 -5 -0.3062 5.38419 2
 11 7 -5 1.30884 4.77485 1
 -11 7 5 13.0495 6.98847 5
 9 -7 -5 10.5686 5.37673 1
 -9 -7 5 3.64716 4.89444 3
 9 7 -5 7.63062 7.2027 6
 9 7 -5 3.25358 4.51994 2
 -9 7 5 -1.292 6.79065 6
 9 7 -5 10.232 5.09233 1
 7 -7 -5 2.32746 5.01773 2
 7 -7 -5 -4.0076 5.81833 1
 -7 -7 5 3.90301 5.21236 3
 7 7 -5 9.00854 6.83714 6
 -7 7 5 2.61231 7.14953 6
 -7 7 5 3.99417 6.38474 5
 5 -7 -5 10.9367 5.23595 2
 -5 -7 5 9.24076 5.29669 4
 -5 -7 5 6.8602 5.20906 3
 5 -7 -5 1.00825 4.84647 4
 5 -7 -5 -0.048 5.33923 1
 -5 7 5 2.72082 7.79723 6
 5 7 -5 23.8328 7.76637 6
 -5 7 5 11.0119 6.24063 5
 3 -7 -5 19.9035 5.94649 1
 -3 -7 5 8.19569 5.27036 4
 3 -7 -5 19.0366 5.33968 3
 3 -7 -5 22.3502 5.457 2
 -3 -7 5 11.9578 5.42529 3
 -3 7 5 14.7875 5.72932 5
 3 7 -5 24.6547 7.26269 6
 -3 7 5 29.0699 8.21831 6
 -1 -7 5 15.1426 5.47558 3
 1 -7 -5 20.1547 5.23688 3
 1 -7 -5 11.0784 4.61389 4
 -1 -7 5 15.4902 6.2209 1
 1 -7 -5 26.2642 5.62711 2
 -1 -7 5 19.6403 5.50318 4
 -1 7 5 16.621 5.59884 5
 -1 7 5 17.8896 7.80429 6
 1 -7 5 8.01056 5.37088 1
 1 -7 5 10.1853 5.50203 4
 1 -7 5 4.72401 4.92048 3
 -1 -7 -5 5.41238 5.06216 3
 1 7 5 7.96727 7.26415 6
 3 -7 5 19.8688 5.66351 3
 -3 -7 -5 16.2639 5.80677 3
 3 -7 5 18.9104 6.05786 1
 3 -7 5 27.8891 6.38463 4
 -3 -7 -5 31.1045 6.93327 2
 5 -7 5 10.1542 5.65347 3
 5 -7 5 20.9934 6.21671 1
 -5 -7 -5 21.7342 6.49916 2
 -5 -7 -5 13.4306 6.00746 3
 -7 -7 -5 27.4247 6.73069 2
 7 -7 5 14.1611 5.93075 3
 -7 -7 -5 10.6323 6.31427 3
 7 -7 5 16.6582 5.9294 1
 7 7 5 22.8901 6.29317 1
 -9 -7 -5 -3.0521 6.35685 3
 9 -7 5 -15.186 8.32039 6
 -9 -7 -5 10.0717 6.88387 2
 9 -7 5 -2.5654 5.74222 3
 9 -7 5 13.5185 5.76326 1
 9 7 5 -7.8605 6.11307 1
 11 -7 5 8.40886 6.76499 1
 -11 -7 -5 4.8985 7.55373 2
 11 -7 5 -3.7716 6.41832 3
 11 7 5 -1.3244 6.92485 1
 12 -8 -5 22.096 6.40081 1
 12 8 -5 25.6594 6.74467 1
 10 -8 -5 52.0216 8.68448 1
 -10 8 5 75.2144 9.82463 6
 10 8 -5 88.5278 13.4695 6
 8 -8 -5 49.0557 7.43862 1
 8 -8 -5 72.2221 9.03007 3
 -8 -8 5 68.7892 8.36911 3
 -8 8 5 55.1135 10.084 6
 8 8 -5 86.985 12.0909 6
 6 -8 -5 25.3753 6.58975 2
 6 -8 -5 20.8392 6.1323 3
 6 -8 -5 11.4665 6.59398 1
 -6 -8 5 20.7158 7.01319 4
 -6 -8 5 16.0936 6.46792 3
 -6 8 5 31.269 8.50252 5
 -4 -8 5 13.1503 7.13025 4
 4 -8 -5 24.0257 7.37437 2
 4 -8 -5 18.854 5.93064 3
 -4 -8 5 18.2015 5.9535 3
 4 -8 -5 7.56813 6.5324 4
 4 -8 -5 10.3942 6.78031 1
 -4 8 5 18.4287 9.07971 6
 2 -8 -5 36.5842 6.56464 3
 -2 -8 5 31.1194 6.78691 3
 -2 -8 5 27.2545 7.69919 4
 2 -8 -5 23.8958 6.78595 4
 0 -8 -5 12.5745 8.14006 2
 0 -8 5 5.9654 6.65068 1
 0 -8 5 7.36658 7.28202 4
 0 -8 5 8.59558 5.83391 3
 0 -8 -5 -7.0081 6.76318 4
 0 -8 -5 1.80559 6.05295 3
 0 8 5 29.0375 9.119 6
 2 -8 5 10.6861 7.70025 4
 -2 -8 -5 6.88944 6.69316 3
 -2 -8 -5 16.5915 7.6181 2
 2 -8 5 -3.1235 6.0175 1
 2 -8 5 11.2305 5.92027 3
 2 8 5 20.7724 9.34613 6
 4 -8 5 -5.308 5.97275 1
 -4 -8 -5 9.14634 7.22693 3
 4 -8 5 -0.8624 6.11414 3
 -4 -8 -5 18.0105 8.43026 2
 4 -8 5 3.25268 7.93126 4
 4 8 5 9.71327 9.0131 6
 6 -8 5 0.60162 6.23921 1
 -6 -8 -5 8.93725 8.17602 3
 6 -8 5 1.11409 6.30685 3
 32 0 -6 52.4099 9.02144 2
 -30 0 6 5.46265 6.78785 5
 30 0 -6 13.255 4.76649 2
 30 0 -6 7.93432 4.45665 2
 28 0 -6 10.4057 4.05794 2
 -28 0 6 3.25334 6.16063 5
 28 0 -6 9.33491 4.19268 2
 26 0 -6 5.63545 3.81312 2
 26 0 -6 3.37168 3.69233 2
 24 0 -6 38.3166 4.68148 2
 24 0 -6 43.9435 4.97516 2
 22 0 -6 40.4923 5.35148 2
 22 0 -6 33.4265 5.18258 2
 -22 0 6 34.2723 5.27857 2
 -20 0 6 103.791 6.27011 2
 20 0 -6 102.883 6.30038 2
 20 0 -6 98.73 6.02917 2
 18 0 -6 531.318 19.4652 2
 -18 0 6 561.668 19.6747 2
 -16 0 6 1311.6 43.0016 2
 16 0 -6 1217.19 42.8413 2
 -14 0 6 2178.38 71.9492 2
 14 0 -6 2120.84 71.8821 2
 -12 0 6 231.898 8.86621 2
 12 0 -6 229.942 8.82187 2
 -10 0 6 15.0111 1.97664 2
 10 0 -6 17.9658 2.14665 2
 10 0 -6 15.6216 1.63925 6
 -8 0 6 102.598 4.59589 2
 8 0 -6 98.5004 4.49913 2
 -8 0 6 98.2172 4.07464 6
 -6 0 6 0.07757 1.51441 2
 6 0 -6 0.84052 1.55688 2
 4 0 -6 533.496 18.2649 2
 -4 0 6 536.778 18.2662 2
 -2 0 6 0.18552 1.5486 2
 2 0 -6 0.44021 1.64745 2
 2 0 -6 -0.1367 1.37197 4
 -2 0 6 -0.654 1.43217 4
 0 0 -6 71.105 3.62763 4
 0 0 -6 71.5594 3.55721 2
 0 0 6 74.5019 3.72818 2
 2 0 6 515.016 17.7371 2
 -2 0 -6 517.315 17.7788 2
 4 0 6 52.4219 3.60762 2
 -4 0 -6 53.9917 3.56751 2
 -6 0 -6 85.1434 4.84395 2
 6 0 6 98.4033 4.95234 5
 6 0 6 75.4239 4.94797 2
 8 0 6 69.6003 4.50558 5
 8 0 6 45.4406 4.38264 2
 -8 0 -6 56.8471 4.40589 2
 10 0 6 336.824 13.5406 5
 -10 0 -6 329.061 12.6689 2
 10 0 6 332.064 12.5839 2
 12 0 6 408.127 16.2995 5
 -12 0 -6 403.593 15.215 2
 12 0 6 390.345 14.9845 2
 14 0 6 555.757 21.2015 2
 -14 0 -6 598.308 21.3172 2
 14 0 6 567.41 22.7052 5
 14 0 6 592.677 21.2938 2
 16 0 6 56.97 6.1108 2
 16 0 6 55.5834 6.22629 2
 -16 0 -6 63.8009 6.86954 2
 18 0 6 7.06271 3.86334 2
 18 0 6 13.5825 4.14787 2
 20 0 6 -2.0536 4.06155 2
 20 0 6 -7.1218 3.49244 2
 22 0 6 -8.5327 4.33782 2
 31 -1 -6 24.5248 5.46251 2
 31 1 -6 12.168 4.66566 2
 29 -1 -6 18.5469 5.12263 2
 29 1 -6 21.1453 4.49236 2
 27 -1 -6 29.1518 4.69439 2
 27 -1 -6 28.1632 4.86988 2
 -27 1 6 33.1769 6.69648 5
 27 1 -6 25.9711 4.33194 2
 25 -1 -6 4.14479 3.82416 2
 -25 -1 6 1.93882 4.82749 5
 25 -1 -6 1.22623 3.55521 2
 25 1 -6 0.47275 3.642 2
 25 1 -6 -0.2712 3.32009 2
 -25 1 6 4.02896 5.46666 5
 -23 1 6 3.27908 4.01434 2
 23 1 -6 3.56364 3.41478 2
 -23 1 6 -6.5494 5.10903 5
 23 1 -6 0.38351 3.2919 2
 21 -1 -6 0.4491 2.99183 2
 21 1 -6 3.50032 2.92778 2
 -21 1 6 -0.603 3.34967 2
 21 1 -6 2.72235 2.97609 2
 19 -1 -6 0.59261 2.53558 2
 -19 -1 6 -2.4821 2.7338 2
 -19 1 6 4.28722 3.05542 2
 19 1 -6 -0.438 2.56965 2
 19 1 -6 1.27852 2.55323 2
 17 -1 -6 0.86734 2.24525 2
 -17 -1 6 2.60145 2.54039 2
 -17 1 6 2.7643 2.6439 2
 17 1 -6 1.7325 2.40558 2
 17 1 -6 0.94652 2.35403 2
 15 -1 -6 145.848 6.57449 2
 -15 -1 6 148.595 6.75952 2
 15 -1 -6 130.798 6.8169 6
 -15 1 6 139.086 6.93244 2
 15 1 -6 149.104 6.63859 2
 13 -1 -6 81.7265 4.41857 6
 13 -1 -6 74.2852 4.48954 2
 -13 -1 6 84.7028 4.60737 2
 -13 1 6 62.4388 4.63797 2
 13 1 -6 79.7129 4.46527 2
 -11 -1 6 105.724 4.95192 2
 11 -1 -6 102.586 4.91621 2
 11 -1 -6 111.412 5.20473 6
 -11 1 6 103.67 5.09063 2
 11 1 -6 108.131 4.96372 2
 -9 -1 6 19.9432 2.66569 2
 9 -1 -6 18.8041 2.73484 2
 9 1 -6 21.1218 2.73879 2
 -9 1 6 18.9306 2.94259 2
 -9 1 6 17.7343 2.23619 6
 7 -1 -6 19.2308 2.66278 2
 -7 -1 6 16.5726 2.48015 2
 -7 -1 6 16.0181 1.72026 6
 7 1 -6 16.9713 2.49017 2
 -7 1 6 17.8862 2.6512 2
 -5 -1 6 -0.436 1.35088 2
 5 -1 -6 1.38338 1.64136 2
 5 1 -6 -1.0788 1.32656 2
 -5 1 6 -0.0429 1.65269 2
 3 -1 -6 697.151 23.893 2
 -3 -1 6 676.573 23.5407 2
 3 -1 -6 690.699 23.5351 4
 -3 -1 6 705.598 25.9293 1
 -3 -1 6 717.317 24.0448 4
 -3 1 6 704.816 23.8744 2
 3 1 -6 721.869 24.4482 3
 3 1 -6 710.983 25.9638 1
 3 1 -6 685.6 23.5773 2
 -1 -1 6 6.17773 1.90681 4
 -1 -1 6 10.1677 2.04554 1
 1 -1 -6 8.2215 1.9267 2
 -1 -1 6 6.83367 1.40363 2
 -1 1 6 9.07349 1.83651 2
 1 1 -6 7.32075 1.41756 2
 1 1 -6 8.61346 1.61794 3
 1 1 -6 10.0856 1.8039 4
 1 -1 6 5.14568 1.60132 3
 1 -1 6 5.44214 1.44735 2
 -1 -1 -6 4.63455 1.9639 2
 1 1 6 6.1789 1.89982 2
 -1 1 -6 5.27654 1.42566 2
 -1 1 -6 6.4083 1.76983 4
 -3 -1 -6 389.711 13.9454 2
 3 -1 6 382.923 13.5209 2
 3 -1 6 417.008 13.8273 3
 -3 1 -6 376.426 13.5524 2
 3 1 6 381.571 13.8687 2
 -3 1 -6 392.477 14.0092 4
 -5 -1 -6 19.4089 3.5788 2
 5 -1 6 29.1714 2.60274 2
 5 -1 6 22.5834 2.13129 3
 5 -1 6 28.6315 3.71487 5
 -5 1 -6 22.1963 2.87897 4
 5 1 6 28.5546 2.978 2
 -5 1 -6 22.2505 2.3922 2
 -7 -1 -6 57.7056 4.31218 2
 7 -1 6 48.0625 4.04551 2
 7 -1 6 60.7093 4.78864 5
 7 1 6 54.9335 4.58131 2
 -7 1 -6 51.5234 4.06308 2
 7 1 6 60.6501 3.70278 5
 -9 -1 -6 1.44595 2.54059 2
 9 -1 6 4.04272 2.78896 5
 9 -1 6 -0.7398 2.2485 2
 -9 1 -6 3.46843 2.45421 2
 9 1 6 3.59926 2.31607 5
 9 1 6 1.22834 2.50638 2
 11 -1 6 65.9583 5.58225 5
 11 -1 6 64.4519 4.82608 2
 11 -1 6 64.5632 4.92504 2
 -11 -1 -6 66.1641 5.54031 2
 11 1 6 58.2607 5.37007 2
 11 1 6 63.8579 4.59695 5
 -11 1 -6 65.3888 5.12258 2
 13 -1 6 133.849 7.07974 2
 13 -1 6 119.591 7.90761 5
 -13 -1 -6 134.956 7.80711 2
 13 1 6 137.722 7.71102 2
 -13 1 -6 135.985 7.5647 2
 -15 -1 -6 119.75 7.70855 2
 15 -1 6 98.1019 7.27351 2
 15 -1 6 121.947 7.26687 2
 15 1 6 125.471 7.57714 2
 17 -1 6 37.664 6.2603 2
 -17 -1 -6 40.2194 6.94295 2
 17 -1 6 45.9048 6.22173 2
 17 1 6 37.8454 5.94413 2
 17 1 6 49.6557 6.17404 2
 19 -1 6 -5.3959 3.73067 2
 21 -1 6 -3.6096 4.1325 2
 21 1 6 -6.691 3.79152 2
 21 1 6 -5.8008 4.26924 2
 23 -1 6 5.47818 5.11495 2
 30 -2 -6 -3.2455 4.77398 2
 30 -2 -6 -5.6449 5.12464 2
 30 2 -6 4.36511 4.33014 2
 -30 2 6 -5.0251 7.04006 5
 28 -2 -6 -5.3964 4.32383 2
 28 -2 -6 -7.9438 6.28648 6
 28 -2 -6 3.80501 4.35183 2
 28 2 -6 3.68745 4.36607 2
 26 -2 -6 -0.6854 3.91394 2
 26 -2 -6 6.79363 5.54938 6
 26 -2 -6 1.01348 3.94287 2
 26 2 -6 5.93742 4.1613 2
 -26 2 6 -4.0733 4.5932 2
 -26 2 6 7.34178 6.0148 5
 24 -2 -6 6.21659 3.97245 2
 24 -2 -6 16.6773 5.14584 6
 24 -2 -6 9.81861 4.03613 2
 -24 2 6 11.0567 4.38425 2
 -24 2 6 7.7092 6.31545 5
 24 2 -6 8.83107 4.18909 2
 22 -2 -6 27.3827 4.80105 6
 -22 2 6 17.7255 4.57126 2
 22 2 -6 24.1799 4.30766 2
 20 -2 -6 89.3072 6.38115 2
 20 -2 -6 106.711 6.8499 6
 20 2 -6 108.537 6.74106 2
 20 2 -6 110.581 6.71708 2
 -20 2 6 115.756 6.91374 2
 18 -2 -6 193.648 9.57364 6
 18 -2 -6 192.631 8.52457 2
 18 2 -6 206.742 8.94022 2
 -18 2 6 204.635 8.93568 2
 18 2 -6 209.013 8.94469 2
 16 -2 -6 359.858 15.2628 6
 16 -2 -6 358.074 13.4943 2
 16 2 -6 363.227 13.6444 2
 16 2 -6 373.065 13.68 2
 -16 2 6 372.639 13.7356 2
 14 -2 -6 555.135 20.2835 2
 14 -2 -6 585.801 23.1053 6
 14 2 -6 570.662 20.3266 2
 -14 2 6 593.766 20.4681 2
 14 2 -6 594.705 20.3734 2
 12 -2 -6 77.61 4.63528 2
 -12 -2 6 89.7432 4.57919 2
 12 -2 -6 88.305 5.36343 6
 12 2 -6 81.5172 4.62613 2
 -12 2 6 79.095 4.79024 2
 12 2 -6 88.0385 4.6402 2
 10 -2 -6 29.7415 3.1894 2
 -10 -2 6 25.074 2.91912 2
 10 2 -6 31.7742 3.09775 2
 -10 2 6 24.0565 3.51871 6
 10 2 -6 25.9736 2.78527 6
 -10 2 6 27.1506 3.41843 2
 8 -2 -6 319.349 11.342 2
 -8 -2 6 305.523 11.079 2
 8 2 -6 317.054 11.7922 3
 -8 2 6 317.062 12.9949 6
 8 2 -6 321.067 12.552 6
 -8 2 6 310.786 11.3676 2
 8 2 -6 305.495 11.0983 2
 6 -2 -6 338.83 11.9772 2
 -6 -2 6 329.217 13.3161 6
 -6 -2 6 333.415 11.4896 2
 6 2 -6 333.009 13.1513 1
 -6 2 6 327.965 11.9359 2
 6 2 -6 335.439 11.55 2
 6 2 -6 329.667 12.3751 3
 4 -2 -6 138.79 5.85182 2
 -4 -2 6 138.926 5.11769 2
 -4 -2 6 143.397 6.40596 1
 -4 -2 6 139.205 6.50827 6
 4 2 -6 139.461 6.46667 1
 -4 2 6 142.228 5.92227 2
 4 2 -6 137.326 5.14945 2
 -2 -2 6 1.24519 2.44521 1
 2 -2 -6 1.7566 1.96143 2
 2 -2 -6 1.30457 2.07066 1
 -2 -2 6 2.0326 2.04191 4
 -2 -2 6 1.33665 1.88279 3
 -2 2 6 -0.001 1.85984 2
 2 2 -6 1.29623 1.88779 3
 0 -2 6 208.725 8.71088 1
 0 -2 6 219.524 8.17431 3
 0 -2 6 193.773 7.12516 2
 0 -2 6 203.279 8.29153 4
 0 -2 -6 205.505 8.12183 2
 0 2 6 206.565 8.33564 1
 0 2 6 199.042 8.0122 2
 0 2 -6 206.769 8.17813 4
 2 -2 6 659.525 23.4287 4
 -2 -2 -6 675.885 23.2255 2
 2 -2 6 658.037 22.5332 2
 2 -2 6 713.396 23.6906 3
 2 -2 6 666.104 25.4348 5
 2 2 6 684.229 25.0636 1
 -2 2 -6 652.935 22.5582 2
 -2 2 -6 664.12 23.3545 4
 2 2 6 661.915 23.2158 2
 -4 -2 -6 663.919 23.0938 2
 4 -2 6 670.065 23.3093 3
 -4 -2 -6 664.7 22.9631 3
 4 -2 6 662.704 25.2969 5
 4 -2 6 651.4 22.3378 2
 -4 2 -6 652.697 23.166 4
 4 2 6 663.048 22.9735 2
 -4 2 -6 652.275 22.3953 2
 6 -2 6 195.462 8.96482 5
 6 -2 6 192.291 7.7504 3
 6 -2 6 194.027 7.27139 2
 -6 -2 -6 190.328 8.17146 2
 6 -2 6 185.566 7.34525 2
 -6 2 -6 189.954 8.13904 4
 6 2 6 193.053 8.13934 2
 -6 2 -6 179.677 7.47356 2
 8 -2 6 62.4661 4.22896 2
 8 -2 6 68.8228 4.09329 2
 -8 -2 -6 65.6804 5.32439 2
 8 -2 6 75.4934 5.62046 5
 -8 2 -6 72.3453 5.34313 4
 8 2 6 67.7975 3.83225 5
 8 2 6 69.747 5.29596 2
 -10 -2 -6 167.584 8.22519 2
 10 -2 6 172.529 7.35164 2
 10 -2 6 177.848 9.00638 5
 10 -2 6 165.784 7.28441 2
 10 2 6 162.998 7.28134 5
 10 2 6 177.776 8.47065 2
 -10 2 -6 173.913 8.27462 4
 12 -2 6 360.234 15.4641 5
 -12 -2 -6 339.62 14.1834 2
 12 -2 6 341.164 13.343 2
 12 -2 6 362.034 13.4635 2
 -12 2 -6 361.876 14.4617 4
 12 2 6 357.003 14.2833 2
 14 -2 6 454.167 17.5914 2
 14 -2 6 462.03 19.8973 5
 -14 -2 -6 470.141 18.5273 2
 14 -2 6 487.633 17.7123 2
 14 2 6 488.364 18.3527 2
 -14 2 -6 505.315 18.7408 4
 16 -2 6 155.194 8.6315 2
 -16 -2 -6 158.656 9.65095 2
 16 2 6 149.059 8.87382 2
 -16 2 -6 163.625 9.92436 4
 18 -2 6 36.2602 4.71149 2
 -18 -2 -6 23.7897 5.14983 2
 18 -2 6 30.4258 4.68711 2
 18 2 6 31.1846 4.58357 2
 18 2 6 30.0199 4.64225 2
 20 -2 6 -5.2155 4.32207 2
 20 -2 6 0.58984 4.3417 2
 22 -2 6 -3.1482 4.84055 2
 22 -2 6 1.47852 5.45223 2
 22 2 6 -1.0781 4.75659 2
 -22 2 -6 0.08583 5.32311 4
 22 2 6 -7.1863 3.88675 2
 29 -3 -6 15.8268 8.5449 6
 29 -3 -6 10.6401 5.48006 2
 29 -3 -6 8.32916 5.44228 2
 29 3 -6 9.16358 4.40688 2
 29 3 -6 12.4576 6.59173 3
 27 -3 -6 34.1113 5.55344 2
 27 -3 -6 57.8613 9.9304 6
 -27 3 6 39.1507 7.4302 5
 27 3 -6 41.5942 7.12833 2
 27 3 -6 40.9653 6.26751 3
 25 -3 -6 14.6819 6.33513 6
 25 -3 -6 10.5772 4.21927 2
 25 3 -6 14.0143 4.79913 2
 -25 3 6 10.9076 5.10167 2
 23 -3 -6 9.89342 5.36429 6
 23 -3 -6 6.16444 3.88437 2
 23 3 -6 1.39864 4.25062 2
 -23 3 6 6.71213 5.02972 2
 23 3 -6 6.24854 4.24424 3
 21 -3 -6 89.7426 7.58203 6
 -21 3 6 86.3635 7.45921 2
 21 3 -6 81.101 6.43099 3
 21 3 -6 85.4543 7.20042 2
 19 -3 -6 4.40296 4.131 6
 19 -3 -6 -6.1813 3.03889 2
 19 3 -6 2.98187 3.0705 2
 -19 3 6 -7.5645 5.03341 5
 -19 3 6 -4.5522 3.36141 2
 19 3 -6 -0.0087 3.31259 3
 17 -3 -6 -4.1533 2.5385 2
 17 -3 -6 -2.1782 3.71093 6
 17 3 -6 2.96209 3.01007 3
 -17 3 6 -4.5557 2.97375 2
 17 3 -6 1.81168 2.89629 2
 17 3 -6 -3.5498 2.82255 2
 15 -3 -6 16.5396 2.82704 2
 15 -3 -6 23.5923 4.21212 6
 -15 3 6 16.8305 3.1062 2
 15 3 -6 26.3063 4.36344 2
 15 3 -6 19.8186 3.06863 2
 15 3 -6 26.7072 4.06551 3
 13 -3 -6 -2.7626 2.14723 2
 13 -3 -6 -0.9043 3.3561 6
 13 3 -6 -1.2357 2.33314 2
 13 3 -6 1.37233 2.53953 3
 -13 3 6 -0.7935 2.36835 2
 13 3 -6 2.53712 2.29011 2
 11 -3 -6 25.7693 3.29329 2
 -11 3 6 23.8116 4.33254 6
 -11 3 6 29.0782 2.92134 4
 11 3 -6 25.3876 3.66669 6
 11 3 -6 31.6625 3.54583 2
 11 3 -6 28.1263 3.90369 3
 -11 3 6 26.0065 3.76371 2
 11 3 -6 28.4335 3.57604 2
 9 -3 -6 52.6347 3.79564 2
 9 3 -6 47.7081 4.0231 3
 9 3 -6 48.0515 4.88188 1
 9 3 -6 48.3401 3.5397 2
 9 3 -6 47.5643 3.55747 2
 -9 3 6 50.3675 3.87834 2
 9 3 -6 49.2808 4.23958 6
 -9 3 6 49.0311 2.98403 4
 -9 3 6 50.4099 5.12674 6
 7 -3 -6 397.861 14.5027 2
 7 3 -6 400.885 14.0729 2
 7 3 -6 412.31 16.5091 6
 7 3 -6 400.674 14.0537 2
 7 3 -6 404.474 16.2027 1
 -7 3 6 403.538 14.5548 2
 -7 3 6 423.122 17.0319 6
 5 -3 -6 375.377 13.7843 2
 5 -3 -6 363.655 15.2323 1
 -5 -3 6 377.06 15.7496 6
 -5 -3 6 389.28 14.41 3
 5 3 -6 388.19 14.4355 3
 5 3 -6 395.088 15.4181 1
 5 3 -6 379.102 13.1396 2
 -5 3 6 399.976 13.8812 2
 5 3 -6 388.741 13.1378 2
 3 -3 -6 1310.43 47.1898 1
 -3 -3 6 1269.78 49.1021 6
 3 -3 -6 1313.32 43.0485 2
 -3 -3 6 1287.43 47.3189 1
 -3 -3 6 1240.73 47.0742 5
 -3 -3 6 1321.52 44.3733 3
 3 3 -6 1234.3 44.3022 3
 -3 3 6 1235.17 42.9832 2
 3 3 -6 1232.16 47.1795 1
 -1 -3 6 14.3412 3.49933 6
 1 -3 -6 19.7513 3.50964 2
 -1 -3 6 18.0479 3.02757 5
 -1 -3 6 14.5133 2.75494 3
 -1 -3 6 8.91518 2.70678 4
 -1 3 6 19.6763 3.48824 2
 1 -3 6 91.2905 5.93065 4
 -1 -3 -6 112.474 5.65354 2
 1 -3 6 108.792 6.458 6
 1 -3 6 99.3079 6.35128 5
 1 -3 6 92.0642 6.00525 1
 1 -3 6 105.63 5.53829 3
 1 3 6 108.883 5.54126 2
 1 3 6 94.0512 5.60745 1
 -3 -3 -6 472.364 17.0548 3
 -3 -3 -6 473.169 17.1181 2
 3 -3 6 486.357 17.4015 3
 3 -3 6 457.517 18.7546 5
 3 -3 6 473.532 17.2601 4
 3 3 6 468.058 17.0069 2
 3 3 6 472.156 18.3342 1
 -3 3 -6 464.752 17.1613 4
 5 -3 6 -4.2979 2.51091 3
 5 -3 6 1.23915 1.53469 2
 5 -3 6 1.18732 3.1606 5
 5 -3 6 0.42977 1.44639 2
 -5 -3 -6 -0.5781 2.10905 3
 -5 -3 -6 4.85833 2.74471 2
 -5 3 -6 6.00576 2.54968 4
 5 3 6 -0.3078 3.02623 1
 5 3 6 1.08123 2.62788 2
 7 -3 6 2.81691 1.92625 2
 7 -3 6 5.74844 1.91243 2
 7 -3 6 2.09056 2.71062 3
 7 -3 6 4.06174 3.43817 5
 -7 -3 -6 5.18369 3.155 2
 -7 3 -6 3.29146 2.67735 4
 7 3 6 2.58371 2.7399 2
 9 -3 6 3.0964 2.19668 2
 9 -3 6 5.9116 3.53163 5
 9 -3 6 -1.4968 2.24217 2
 -9 -3 -6 0.75155 3.12089 2
 9 3 6 1.89057 3.02706 2
 -9 3 -6 2.5317 3.00002 4
 11 -3 6 77.1937 5.17078 2
 11 -3 6 74.5229 5.22779 2
 -11 -3 -6 76.947 6.86409 2
 11 -3 6 72.5134 7.30245 5
 -11 3 -6 76.535 6.25085 4
 11 3 6 81.3228 6.64636 2
 13 -3 6 72.6746 7.62175 5
 -13 -3 -6 65.4114 7.54741 2
 13 -3 6 62.5226 5.61778 2
 13 3 6 73.0252 6.81162 2
 -13 3 -6 53.4079 6.61616 4
 -15 -3 -6 35.2433 5.06429 2
 15 -3 6 32.0303 5.52685 2
 15 -3 6 38.4992 5.79802 2
 15 3 6 42.1561 6.76377 2
 -15 3 -6 33.2915 4.96076 4
 -17 -3 -6 29.0942 5.26269 2
 17 -3 6 31.6426 4.71382 2
 -17 3 -6 37.0397 5.39307 4
 17 3 6 38.367 5.49548 2
 -19 -3 -6 2.21275 4.77117 2
 19 -3 6 2.56772 4.55207 2
 19 3 6 1.62482 4.26222 2
 19 3 6 -0.4292 4.42922 2
 -21 -3 -6 22.0798 5.69116 2
 21 -3 6 17.7007 5.56653 2
 21 3 6 24.4904 5.27484 2
 28 -4 -6 10.3558 6.37572 2
 28 4 -6 2.02999 5.10822 2
 26 -4 -6 11.1354 7.96578 6
 -26 4 6 -1.1939 5.58562 2
 26 4 -6 9.45345 4.50441 2
 26 4 -6 1.31332 5.4252 3
 24 -4 -6 9.85186 6.86587 6
 24 -4 -6 6.15494 4.96178 2
 24 4 -6 12.8647 4.92891 2
 24 4 -6 4.27937 4.85511 3
 22 -4 -6 -4.6417 4.39476 2
 22 -4 -6 -1.4117 5.43144 6
 22 4 -6 -3.3256 4.20884 3
 22 4 -6 -9.1798 4.60668 2
 20 -4 -6 48.5817 6.94977 2
 20 -4 -6 64.5913 7.84833 6
 20 4 -6 75.4808 7.37947 2
 -20 4 6 66.2711 6.85126 4
 -20 4 6 50.3116 6.69417 2
 20 4 -6 76.5139 6.83773 3
 -20 4 6 57.0449 9.00172 5
 18 -4 -6 33.7239 6.72237 6
 18 4 -6 48.5176 5.93139 2
 -18 4 6 34.4349 4.41897 4
 18 4 -6 36.4092 5.81777 3
 -18 4 6 39.4201 6.90065 5
 -18 4 6 29.3245 4.61678 2
 16 -4 -6 50.861 5.03538 2
 16 -4 -6 56.9603 6.88069 6
 -16 4 6 44.3612 8.28129 5
 -16 4 6 63.3764 5.41113 4
 -16 4 6 56.7336 5.55086 2
 16 4 -6 62.6913 5.45892 3
 16 4 -6 62.029 5.67712 2
 14 -4 -6 47.6213 4.59374 2
 14 -4 -6 54.2055 6.28143 6
 -14 4 6 48.5809 4.45118 4
 14 4 -6 48.6228 5.27018 3
 -14 4 6 47.8429 4.80526 2
 14 4 -6 49.0164 5.37578 2
 14 4 -6 52.5973 5.03556 2
 12 4 -6 1.95409 2.55841 2
 12 4 -6 4.87583 3.57058 6
 12 4 -6 5.23962 2.72132 2
 -12 4 6 6.7362 4.01883 6
 -12 4 6 1.98281 2.28036 4
 12 4 -6 3.03773 3.97589 1
 12 4 -6 -0.6704 2.91141 3
 -12 4 6 3.14505 2.71028 2
 10 -4 -6 13.222 2.54031 2
 10 4 -6 22.717 3.87081 2
 -10 4 6 14.5243 4.28096 6
 -10 4 6 17.499 2.75892 2
 10 4 -6 26.6651 4.81822 1
 10 4 -6 16.015 2.63734 2
 10 4 -6 17.6188 3.31074 3
 10 4 -6 18.4266 3.9965 6
 -8 -4 6 139.702 7.24507 5
 8 -4 -6 138.516 6.33229 2
 -8 -4 6 145.349 7.21981 3
 8 4 -6 142.169 7.63218 6
 8 4 -6 145.555 7.05424 3
 8 4 -6 137.749 6.03076 2
 -8 4 6 143.78 6.49884 2
 8 4 -6 136.854 5.98204 2
 -8 4 6 135.877 8.44144 6
 8 4 -6 140.997 7.85486 1
 -6 -4 6 2.73851 3.09849 5
 6 -4 -6 11.1468 2.52907 2
 -6 -4 6 1.41218 3.27686 3
 6 4 -6 12.6143 3.07748 3
 6 4 -6 12.1423 3.70714 1
 -6 4 6 4.969 4.44637 6
 6 4 -6 6.51997 1.80124 2
 6 4 -6 8.84794 3.76354 6
 4 -4 -6 355.515 12.6369 2
 -4 -4 6 346.568 14.0616 5
 -4 -4 6 343.112 13.4614 3
 4 -4 -6 302.044 14.1492 1
 -4 -4 6 304.602 14.4351 1
 -4 -4 6 329.403 14.5787 6
 -4 4 6 368.023 12.751 2
 4 4 -6 342.042 14.0305 1
 2 -4 -6 244.039 9.40145 2
 -2 -4 6 225.61 10.8787 6
 -2 -4 6 227.807 10.4419 5
 -2 -4 6 205.317 9.86337 3
 -2 -4 6 233.091 9.6694 4
 -2 4 6 227.598 9.3049 2
 0 -4 6 10.9455 3.8046 5
 0 -4 6 17.4369 3.96011 6
 0 -4 6 10.4011 3.11954 3
 0 -4 6 12.6278 3.05976 4
 -2 -4 -6 70.9223 5.29913 2
 2 -4 6 58.0186 5.98654 6
 2 -4 6 58.8108 5.00024 3
 -2 -4 -6 44.541 4.76637 3
 2 -4 6 53.7439 5.5007 1
 2 -4 6 52.4395 5.88046 5
 2 -4 6 57.0125 5.42049 4
 2 4 6 57.3875 5.1528 1
 4 -4 6 163.32 7.88976 3
 -4 -4 -6 168.448 7.96743 2
 4 -4 6 166.494 8.93752 5
 4 -4 6 167.735 9.33818 6
 4 -4 6 152.788 8.51319 1
 4 -4 6 163.803 8.29385 4
 -4 -4 -6 150.054 7.5022 3
 4 4 6 164.991 8.30242 1
 4 4 6 167.252 7.88999 2
 6 -4 6 19.2069 4.37205 5
 -6 -4 -6 19.9098 3.77417 2
 6 -4 6 12.6943 3.51472 3
 6 -4 6 13.16 4.9991 6
 -6 -4 -6 9.15022 3.10412 3
 6 4 6 10.9384 3.33012 2
 6 4 6 13.8279 4.11861 1
 -6 4 -6 11.2163 3.16342 4
 -8 -4 -6 -1.1883 3.61822 2
 8 -4 6 0.70975 4.09047 5
 8 -4 6 -5.9657 5.15471 6
 8 -4 6 -6.2608 3.40135 3
 8 -4 6 2.64149 1.95925 2
 8 4 6 1.86287 3.36926 2
 8 4 6 4.42015 4.13957 1
 -8 4 -6 -3.2758 3.17097 4
 10 -4 6 30.9402 5.72337 3
 10 -4 6 40.8567 6.87064 6
 10 -4 6 36.5709 6.85359 5
 -10 -4 -6 33.2421 4.77434 2
 -10 4 -6 29.3038 4.57797 4
 10 4 6 38.7157 6.20483 1
 12 -4 6 76.1492 5.93246 2
 -12 -4 -6 64.3316 8.05635 2
 12 -4 6 75.1876 5.72516 2
 12 -4 6 76.2857 7.91816 5
 -12 4 -6 75.8248 7.28334 4
 14 -4 6 51.0837 6.38959 2
 14 -4 6 49.3859 5.98533 2
 -14 -4 -6 49.5439 7.79972 2
 -14 4 -6 59.1879 7.32119 4
 -16 -4 -6 8.49099 4.8857 2
 16 -4 6 8.93902 4.32001 2
 16 4 6 12.8285 4.36953 2
 -16 4 -6 14.404 4.80432 4
 18 4 6 1.70891 4.46336 2
 -18 4 -6 8.83301 4.66772 4
 20 -4 6 2.45051 6.13465 2
 20 -4 6 5.30301 5.66765 3
 -20 -4 -6 6.00267 5.19286 2
 -20 4 -6 11.7951 5.32013 4
 20 4 6 1.71386 4.90714 2
 27 -5 -6 29.2023 7.22172 2
 -27 5 6 35.1632 8.37154 4
 -27 5 6 29.6513 8.08018 5
 27 5 -6 29.5742 6.32773 2
 -25 5 6 25.0943 6.87958 2
 -25 5 6 25.4694 6.71791 4
 25 5 -6 26.5397 6.1197 2
 25 5 -6 31.8061 6.77147 3
 23 -5 -6 -3.9157 7.03483 6
 23 5 -6 5.35407 5.19677 3
 23 5 -6 3.44778 5.61002 2
 -23 5 6 -3.368 6.81871 5
 -23 5 6 9.81891 6.02433 2
 -23 5 6 2.4052 5.81353 4
 21 -5 -6 146.014 9.28262 2
 21 -5 -6 125.62 11.6069 6
 21 5 -6 158.501 10.8187 2
 -21 5 6 138.53 9.52954 2
 21 5 -6 135.788 9.46248 3
 -21 5 6 138.888 9.74313 4
 -21 5 6 139.354 11.664 5
 19 -5 -6 16.317 7.52498 6
 19 5 -6 30.649 5.40778 2
 19 5 -6 27.4234 4.99985 3
 -19 5 6 38.2813 7.29079 5
 -19 5 6 19.7423 4.93492 4
 17 -5 -6 20.9358 6.42071 6
 -17 5 6 22.8677 4.40506 4
 17 5 -6 26.2699 4.74216 3
 17 5 -6 26.1129 4.9329 2
 -17 5 6 31.8496 6.76905 5
 17 5 -6 31.5511 6.12796 1
 -17 5 6 18.2444 4.59437 2
 -15 5 6 13.8932 6.30346 5
 15 5 -6 10.7745 4.04813 3
 15 5 -6 17.0014 5.68476 6
 -15 5 6 14.4749 3.76392 4
 15 5 -6 14.4047 4.1603 2
 -15 5 6 10.3617 4.04502 2
 15 5 -6 18.3449 5.29546 1
 -13 5 6 4.82174 5.73088 6
 -13 5 6 3.76286 5.95804 5
 13 5 -6 8.67798 5.09044 6
 13 5 -6 8.78413 3.90778 3
 13 5 -6 12.0845 4.9874 1
 13 5 -6 8.29221 3.51757 2
 -13 5 6 11.4161 3.78338 2
 -11 -5 6 14.0404 4.05733 5
 11 5 -6 12.4025 4.77881 6
 -11 5 6 8.20075 5.68187 6
 11 5 -6 12.0269 3.24272 2
 11 5 -6 17.7432 4.82379 1
 -11 5 6 6.15597 5.30829 5
 -11 5 6 11.5315 3.31767 2
 11 5 -6 10.0164 3.78743 3
 9 -5 -6 4.99137 4.27487 1
 -9 -5 6 5.19064 3.84401 5
 -9 -5 6 2.12639 3.56646 3
 -9 5 6 -2.9321 4.53921 5
 9 5 -6 2.73534 4.30242 6
 9 5 -6 9.72817 4.43672 1
 9 5 -6 4.15911 2.71404 2
 -9 5 6 3.45537 3.01066 2
 -9 5 6 0.27297 5.48614 6
 -7 -5 6 82.4041 6.6256 5
 -7 -5 6 80.0989 6.37998 3
 7 -5 -6 72.6174 6.54734 1
 7 -5 -6 83.3388 5.61333 2
 -7 5 6 79.9367 7.88252 6
 -7 5 6 70.959 7.12086 5
 -7 5 6 87.1097 5.61422 2
 7 5 -6 68.9348 4.47644 2
 7 5 -6 80.0655 6.85971 6
 7 5 -6 73.585 6.28731 1
 -5 -5 6 271.076 11.9796 3
 5 -5 -6 258.094 12.7684 1
 5 -5 -6 269.627 10.984 2
 -5 -5 6 285.564 12.3897 5
 5 5 -6 268.38 12.4092 1
 5 5 -6 283.087 13.1322 6
 -5 5 6 277.949 10.9144 2
 -5 5 6 280.05 12.4207 5
 -5 5 6 272.251 13.605 6
 -3 -5 6 389.35 15.6219 3
 -3 -5 6 390.276 15.3529 4
 -3 -5 6 396.035 16.9627 1
 3 -5 -6 397.154 14.9113 2
 3 -5 -6 391.158 16.7252 1
 -3 -5 6 392.47 17.2407 6
 -3 -5 6 406.74 16.4541 5
 -3 5 6 383.516 17.8291 6
 -3 5 6 392.772 15.9704 5
 -1 -5 6 220.543 11.7632 1
 -1 -5 6 252.529 11.6676 5
 -1 -5 6 237.14 10.9105 3
 -1 -5 6 240.872 10.9672 4
 -1 -5 6 247.378 12.0911 6
 1 -5 -6 240.184 10.1343 2
 1 -5 -6 245.52 11.5729 1
 -1 5 6 239.396 10.5354 5
 -1 5 6 246.208 10.2157 2
 1 -5 6 258.506 11.3791 4
 1 -5 6 279.952 12.3048 5
 -1 -5 -6 249.499 10.7414 2
 1 -5 6 252.644 11.2193 3
 1 -5 6 246.19 12.1639 1
 1 -5 6 246.881 12.676 6
 -1 -5 -6 240.431 10.9716 3
 1 5 6 240.839 10.6495 5
 3 -5 6 100.823 7.52313 4
 3 -5 6 98.319 8.37399 6
 3 -5 6 91.9635 6.82141 3
 3 -5 6 102.916 7.6275 5
 -3 -5 -6 102.977 7.02782 2
 -3 -5 -6 76.9199 6.52023 3
 3 -5 6 87.7081 7.31153 1
 3 5 6 94.9179 6.71037 1
 3 5 6 80.4766 5.29643 5
 5 -5 6 0.00666 4.79454 5
 -5 -5 -6 5.5065 4.12607 2
 5 -5 6 15.043 6.18849 6
 5 -5 6 3.68162 4.49541 1
 5 -5 6 -4.7078 3.70287 3
 -5 -5 -6 -3.9805 3.80351 3
 5 5 6 3.16311 3.54518 2
 5 5 6 2.01945 4.38333 1
 7 -5 6 -4.8195 4.01013 3
 -7 -5 -6 -0.1173 4.29888 2
 7 -5 6 5.40157 4.95126 5
 -7 -5 -6 -4.4934 3.89206 3
 7 -5 6 -3.3102 5.85333 6
 7 -5 6 1.25599 4.86603 1
 7 5 6 2.14818 4.6277 1
 7 5 6 -5.4485 3.73474 2
 -9 -5 -6 -1.9318 4.47693 2
 9 -5 6 -2.9832 4.12384 3
 9 -5 6 2.79342 4.83316 5
 9 -5 6 5.01683 6.22785 6
 9 5 6 5.61557 5.07648 1
 -9 5 -6 1.06771 3.85395 4
 11 -5 6 24.5546 7.44812 6
 -11 -5 -6 29.5121 5.89233 2
 11 -5 6 28.867 5.30406 3
 -11 5 -6 24.6827 4.89382 4
 11 5 6 35.8046 6.08272 1
 13 -5 6 30.5712 7.15578 6
 13 -5 6 22.1346 5.52816 3
 -13 -5 -6 34.3712 5.76494 2
 -13 5 -6 26.6804 5.3219 4
 13 5 6 34.913 6.33886 1
 15 -5 6 16.5174 5.63507 3
 -15 -5 -6 21.6696 5.77323 2
 15 5 6 24.7751 7.32767 1
 -15 5 -6 26.0638 5.60765 4
 17 -5 6 19.8835 6.3403 3
 17 5 6 18.8192 7.92729 1
 -17 5 -6 20.9887 6.35144 4
 24 -6 -6 5.59472 9.79776 6
 -24 6 6 11.0441 7.93141 4
 24 6 -6 4.15745 6.63801 1
 24 6 -6 8.18187 7.49095 2
 22 6 -6 56.7054 9.31875 3
 -22 6 6 33.0088 7.37632 4
 22 6 -6 41.1869 8.00215 1
 20 6 -6 22.6561 6.59364 2
 20 6 -6 6.57254 5.61887 3
 -20 6 6 -0.0661 6.0972 4
 20 6 -6 13.8877 5.73453 1
 18 6 -6 30.8655 6.06 2
 18 6 -6 32.2918 6.73127 1
 18 6 -6 28.4833 6.01881 3
 18 6 -6 32.0744 8.08176 6
 -16 6 6 16.3748 6.94956 5
 16 6 -6 12.668 5.0994 2
 16 6 -6 9.38312 7.40854 6
 16 6 -6 20.6584 5.7128 1
 14 6 -6 -0.7246 4.60947 2
 14 6 -6 0.20056 5.26746 1
 14 6 -6 -2.8663 6.15408 6
 -14 6 6 -2.636 6.19294 5
 12 6 -6 0.48665 5.99767 6
 -12 6 6 0.31067 4.48791 2
 12 6 -6 4.44531 4.04681 2
 12 6 -6 4.9948 5.15332 1
 -12 6 6 -1.4065 6.54608 6
 -12 6 6 -6.4547 6.00754 5
 10 -6 -6 11.8465 5.48686 1
 -10 6 6 8.23814 5.9798 5
 -10 6 6 4.86271 6.73435 6
 10 6 -6 14.1166 5.90841 6
 10 6 -6 9.74537 3.93922 2
 10 6 -6 7.2954 5.09847 1
 -10 6 6 11.0256 4.05594 2
 8 -6 -6 4.20485 4.96403 1
 -8 -6 6 6.99527 5.20988 5
 -8 -6 6 -0.5656 4.47503 3
 -8 6 6 5.75549 3.77034 2
 -8 6 6 -9.1307 6.94752 6
 -8 6 6 10.1796 5.57896 5
 8 6 -6 10.1393 5.73712 6
 8 6 -6 8.41259 4.75243 1
 -6 -6 6 9.75322 5.51941 5
 -6 -6 6 10.411 4.67111 3
 6 -6 -6 5.79309 5.42419 1
 6 -6 -6 1.69029 3.78355 4
 6 -6 -6 8.15806 3.91683 2
 -6 6 6 6.84788 7.13148 6
 -6 6 6 6.66781 5.31624 5
 6 6 -6 8.52145 5.98519 6
 -4 -6 6 11.6877 4.43575 4
 -4 -6 6 8.37129 4.85695 3
 4 -6 -6 14.9257 4.08513 2
 -4 -6 6 11.2161 5.55883 5
 4 -6 -6 12.3594 5.40009 1
 -4 6 6 13.7378 6.78006 6
 -4 6 6 14.6527 3.81006 2
 -4 6 6 6.84855 5.07788 5
 -2 -6 6 17.5967 5.5303 1
 -2 -6 6 20.1174 6.15507 5
 -2 -6 6 6.78304 4.86126 3
 -2 6 6 18.5499 7.04063 6
 -2 6 6 14.3199 4.77254 5
 0 -6 6 0.55592 5.97058 5
 0 -6 6 5.38266 4.53551 4
 0 -6 6 -4.4281 5.19806 1
 0 -6 -6 0.86475 4.47261 3
 0 -6 6 14.3676 6.19025 6
 0 -6 -6 13.6555 4.84183 2
 0 6 6 3.16699 3.78607 5
 2 -6 6 -6.4699 4.60264 3
 2 -6 6 4.67152 4.60319 4
 2 -6 6 -3.9292 6.36388 6
 2 -6 6 -4.6491 5.31668 1
 2 -6 6 12.8544 5.33373 5
 -2 -6 -6 3.27402 4.57631 2
 2 6 6 5.88409 3.652 5
 -4 -6 -6 18.024 5.45537 2
 4 -6 6 5.28923 5.19488 1
 4 -6 6 0.75392 4.69318 3
 4 -6 6 9.83339 6.85745 6
 -4 -6 -6 1.68872 4.89379 3
 4 -6 6 14.4301 4.99994 4
 4 6 6 22.5544 4.39092 5
 4 6 6 11.0774 4.83628 1
 6 -6 6 3.12193 4.35422 3
 6 -6 6 9.22252 5.29428 1
 6 -6 6 8.88868 7.15894 6
 -6 -6 -6 2.7787 5.21288 2
 -6 -6 -6 -2.4597 5.00973 3
 6 6 6 3.59008 5.13403 1
 8 -6 6 16.1836 7.43104 6
 -8 -6 -6 7.09451 5.15629 3
 -8 -6 -6 8.06025 5.08264 2
 8 -6 6 3.79211 5.0289 3
 8 -6 6 18.5855 5.86712 1
 8 6 6 6.4773 5.75477 1
 -10 -6 -6 2.28718 6.21746 2
 10 -6 6 6.31062 5.90569 1
 10 -6 6 8.7129 5.50767 3
 10 -6 6 19.7362 8.80919 6
 10 6 6 5.75119 5.9892 1
 -12 -6 -6 0.14227 5.66311 2
 12 -6 6 4.82859 8.06578 6
 12 -6 6 -4.605 5.42307 3
 12 -6 6 1.19165 6.10659 1
 12 6 6 -4.4858 6.99377 1
 14 -6 6 -9.1192 6.24929 3
 -14 -6 -6 3.69273 6.06843 2
 14 -6 6 15.8485 8.56131 6
 14 6 6 9.26436 7.93703 1
 19 7 -6 16.3083 6.57609 1
 19 7 -6 30.9055 10.7344 6
 19 7 -6 28.631 7.99386 2
 17 7 -6 13.2028 9.82066 6
 17 7 -6 13.2373 7.09351 2
 17 7 -6 5.96376 6.24385 1
 -17 7 6 3.34798 6.058 2
 15 7 -6 10.8936 5.65297 1
 15 7 -6 19.8958 9.4412 6
 15 7 -6 10.6777 6.4433 2
 13 7 -6 14.8403 6.04203 2
 -13 7 6 28.3788 7.71071 6
 13 7 -6 17.104 8.5908 6
 -13 7 6 20.1648 5.92581 2
 13 7 -6 14.7748 5.9334 1
 -13 7 6 21.6188 7.28483 5
 11 -7 -6 43.3559 7.13556 1
 11 7 -6 27.6749 5.95643 1
 -11 7 6 35.5965 7.8666 6
 11 7 -6 40.3975 8.69466 6
 -9 -7 6 16.9407 5.62434 3
 9 -7 -6 16.5433 5.62651 1
 9 7 -6 22.3136 5.77737 1
 9 7 -6 23.1454 7.60322 6
 -9 7 6 13.5089 7.57413 6
 7 -7 -6 43.2793 7.36462 1
 -7 -7 6 39.9467 7.45706 3
 -7 7 6 47.1988 8.60842 5
 7 7 -6 62.8007 9.93744 6
 -7 7 6 39.4831 8.49896 6
 -5 -7 6 80.7878 8.99907 4
 5 -7 -6 58.6711 8.07513 1
 -5 -7 6 68.2449 7.94232 3
 5 -7 -6 55.4549 7.83733 4
 -5 7 6 75.5707 8.66562 5
 -5 7 6 78.0874 10.3583 6
 -3 -7 6 85.0141 8.22609 3
 -3 -7 6 87.7609 8.73089 4
 3 -7 -6 86.7532 8.56755 1
 3 -7 -6 70.8807 7.85293 3
 3 -7 -6 61.0927 8.01186 4
 -3 7 6 78.6205 9.94112 6
 -3 7 6 77.2818 8.93713 5
 1 -7 -6 61.1623 7.57417 3
 -1 -7 6 61.3483 7.67121 1
 -1 -7 6 53.1483 7.56798 3
 -1 -7 6 74.1493 9.21739 4
 -1 7 6 63.0256 7.33017 5
 -1 -7 -6 35.6171 6.05869 3
 1 -7 6 43.1369 6.4013 3
 1 -7 6 54.581 8.96268 4
 1 -7 6 37.9651 7.17376 1
 3 -7 6 36.4556 6.59726 4
 3 -7 6 38.7975 6.70255 1
 -3 -7 -6 31.9188 6.48552 3
 3 -7 6 32.0651 6.10575 3
 3 -7 6 53.4551 9.8088 6
 -5 -7 -6 30.8976 7.1766 2
 5 -7 6 20.2987 6.09173 1
 5 -7 6 12.8447 5.59961 3
 -5 -7 -6 22.0191 6.4011 3
 5 -7 6 37.6345 8.55075 6
 -7 -7 -6 24.73 6.84222 2
 7 -7 6 4.22548 8.18172 6
 7 -7 6 11.2542 5.83314 1
 7 -7 6 8.08046 5.33465 3
 -7 -7 -6 10.7712 6.51985 3
 7 7 6 5.32438 6.4348 1
 9 -7 6 16.9441 6.81791 1
 -9 -7 -6 18.9555 7.89059 2
 -9 -7 -6 2.26641 6.71787 3
 9 7 6 11.4333 7.26434 1
 11 -7 6 -5.7985 6.86882 3
 11 -7 6 4.57874 6.54907 1
 -11 -7 -6 -3.1209 8.32834 2
 11 7 6 0.33989 7.63703 1
 12 -8 -6 4.36221 6.28303 1
 12 8 -6 11.1768 5.85284 1
 10 -8 -6 13.0126 6.81181 1
 -10 8 6 28.1945 8.05561 6
 8 -8 -6 -9.2868 5.89871 1
 -8 -8 6 1.13674 5.31136 3
 -8 8 6 6.06651 7.80112 6
 -8 8 6 12.0664 8.70192 5
 6 -8 -6 1.29358 6.54552 1
 -6 -8 6 14.8302 5.81433 3
 6 -8 -6 0.75756 5.62832 3
 -6 -8 6 0.92742 6.69032 4
 -6 8 6 5.78706 7.78843 6
 -6 8 6 2.77335 8.06232 5
 -4 -8 6 7.28198 7.13797 4
 4 -8 -6 20.4418 6.93426 2
 4 -8 -6 17.0721 5.89806 3
 4 -8 -6 3.77273 6.02279 4
 4 -8 -6 4.95229 7.72457 1
 -4 -8 6 7.70528 5.85218 3
 -4 8 6 -4.6469 8.64347 6
 2 -8 -6 19.1681 6.83634 4
 2 -8 -6 36.0538 8.08798 2
 2 -8 -6 10.847 6.01875 3
 -2 -8 6 18.8092 7.32699 4
 -2 -8 6 17.4712 5.98367 3
 -2 8 6 24.0161 8.03473 5
 0 -8 -6 14.2322 6.65834 3
 0 -8 -6 3.52194 6.43737 4
 0 -8 6 9.13569 6.6498 1
 0 -8 6 20.5026 6.0618 3
 0 -8 6 21.2725 7.35939 4
 -2 -8 -6 21.7468 8.53212 2
 -2 -8 -6 4.9618 7.13732 3
 2 -8 6 19.7633 7.86008 4
 2 -8 6 17.969 6.20757 3
 -4 -8 -6 19.6066 8.04315 3
 -4 -8 -6 26.8317 8.5592 2
 4 -8 6 10.686 6.55502 3
 4 -8 6 8.24703 6.39748 1
 32 0 -7 10.8617 4.83034 2
 32 0 -7 -2.118 4.4247 2
 -32 0 7 -3.1236 7.54763 5
 30 0 -7 6.56195 4.54387 2
 28 0 -7 -3.8314 3.47586 2
 28 0 -7 -4.9348 4.0006 2
 26 0 -7 -3.5984 3.50353 2
 26 0 -7 -1.0977 3.67719 2
 22 0 -7 -4.9601 2.8146 2
 -22 0 7 -2.3918 3.34466 2
 22 0 -7 -5.5105 3.02245 2
 -20 0 7 -1.1854 2.80969 2
 20 0 -7 0.39794 2.60075 2
 18 0 -7 2.60672 2.31371 2
 -18 0 7 3.23143 2.77182 2
 -16 0 7 -3.2702 2.63876 2
 16 0 -7 -1.4781 2.3448 2
 12 0 -7 -0.7136 1.26223 6
 -12 0 7 -2.8176 1.922 2
 10 0 -7 -1.7148 1.73055 2
 -10 0 7 0.24269 1.71631 2
 -8 0 7 -0.1285 1.64553 2
 8 0 -7 -0.5325 1.56103 2
 -6 0 7 0.11198 1.5491 2
 6 0 -7 -0.7507 1.52656 2
 -4 0 7 -0.5541 1.48154 4
 -4 0 7 0.01858 1.50705 2
 4 0 -7 -0.5127 1.56559 2
 2 0 -7 -1.1857 1.66782 2
 -2 0 7 -0.8918 1.61467 2
 2 0 -7 0.50971 1.41458 4
 -2 0 7 -1.3345 1.54794 4
 0 0 -7 -1.7563 1.47591 4
 0 0 7 -1.4594 1.59747 2
 0 0 -7 -1.4068 1.57894 2
 -2 0 -7 2.1749 1.82686 2
 2 0 7 -1.5041 1.7222 2
 4 0 7 -2.8535 1.91748 2
 -4 0 -7 1.36284 2.00185 2
 6 0 7 0.7546 2.29052 5
 -6 0 -7 -3.0062 2.04957 2
 -8 0 -7 0.97208 2.22335 2
 8 0 7 -1.5632 2.37541 2
 8 0 7 0.14253 2.59648 5
 -10 0 -7 3.92035 2.79932 2
 10 0 7 2.02913 2.735 5
 10 0 7 -0.2562 2.47821 2
 12 0 7 6.35381 3.2658 5
 12 0 7 7.3621 2.95542 2
 -12 0 -7 9.34258 3.20943 2
 -14 0 -7 9.1447 3.56523 2
 14 0 7 8.76776 3.31141 2
 14 0 7 11.9461 3.76784 5
 16 0 7 0.33298 3.42656 2
 16 0 7 -1.182 3.33411 2
 -16 0 -7 -4.8107 3.87689 2
 20 0 7 -2.8073 4.08652 2
 33 -1 -7 66.3575 9.92851 2
 33 1 -7 62.2875 9.86794 2
 31 -1 -7 33.0977 5.73615 2
 31 -1 -7 21.7779 5.32746 2
 31 1 -7 20.9455 5.03254 2
 29 -1 -7 29.1693 5.28628 2
 -29 -1 7 32.0038 6.50731 5
 29 1 -7 21.5053 4.8409 2
 -27 -1 7 35.1456 6.13709 5
 27 -1 -7 41.4599 6.73705 2
 27 -1 -7 38.007 6.4102 2
 27 1 -7 36.2285 4.98252 2
 27 1 -7 34.112 4.73365 2
 -27 1 7 38.3714 6.90772 5
 25 -1 -7 -4.1392 3.74361 2
 25 -1 -7 -5.0052 3.49071 2
 -25 1 7 -4.2569 4.06414 2
 25 1 -7 -1.0409 3.697 2
 25 1 -7 -6.1656 3.28388 2
 -23 1 7 -1.0154 3.8742 2
 23 1 -7 1.82657 3.65073 2
 23 1 -7 2.82503 3.26129 2
 21 -1 -7 -3.54 2.74696 2
 -21 1 7 -0.2352 3.32951 2
 21 1 -7 -2.9736 2.82034 2
 21 1 -7 1.10932 2.78071 2
 19 -1 -7 5.19326 2.63127 6
 -19 -1 7 -1.5013 2.79696 2
 19 -1 -7 1.8731 2.56255 2
 19 1 -7 3.28882 2.62884 2
 -19 1 7 0.58093 2.96437 2
 19 1 -7 4.95725 2.61124 2
 -17 -1 7 230.591 9.32012 2
 17 -1 -7 222.733 9.75551 6
 17 -1 -7 218.839 9.13131 2
 17 1 -7 223.525 9.19842 2
 -17 1 7 234.357 9.41329 2
 15 -1 -7 1561.44 53.2114 2
 15 -1 -7 1574.49 60.3129 6
 -15 -1 7 1587.39 53.2374 2
 15 1 -7 1566.52 53.1871 2
 -15 1 7 1610.08 53.3213 2
 -13 -1 7 181.464 7.52291 2
 13 -1 -7 176.516 7.53329 2
 13 -1 -7 193.115 7.94697 6
 -13 1 7 174.148 7.688 2
 13 1 -7 188.784 7.49786 2
 11 -1 -7 629.568 21.862 2
 -11 -1 7 627.235 21.7868 2
 -11 1 7 624.029 24.5365 6
 -11 1 7 652.44 21.9373 2
 11 1 -7 637.767 21.7988 2
 -9 -1 7 1585.17 52.5922 2
 9 -1 -7 1545.69 52.6204 2
 -9 1 7 1560.81 59.7999 6
 9 1 -7 1534.69 52.5277 2
 -9 1 7 1634.3 52.7776 2
 7 -1 -7 42.9663 3.16486 2
 -7 -1 7 47.9432 3.00176 2
 -7 1 7 42.5794 3.26552 2
 7 1 -7 43.3331 2.89759 2
 5 -1 -7 855.922 28.8926 2
 -5 -1 7 860.896 28.6297 2
 5 1 -7 827.297 28.5952 2
 -5 1 7 878.668 28.9261 2
 5 1 -7 839.726 31.4369 1
 -3 -1 7 662.406 24.0907 1
 3 -1 -7 634.389 21.9407 4
 3 -1 -7 660.235 22.3537 2
 -3 -1 7 647.783 22.4175 4
 -3 -1 7 646.397 21.9613 2
 3 1 -7 653.638 24.1196 1
 -3 1 7 647.932 22.2596 2
 3 1 -7 645.016 21.969 2
 3 1 -7 656.988 22.7328 3
 1 -1 -7 75.7814 4.11363 2
 -1 -1 7 78.3039 3.91272 1
 -1 -1 7 75.0296 3.52823 2
 -1 -1 7 72.0354 4.26664 4
 -1 1 7 78.0276 4.04542 2
 1 1 -7 79.3635 3.66368 3
 1 1 -7 77.5628 3.50991 2
 1 1 -7 76.4533 4.08944 4
 -1 -1 -7 0.01665 1.95832 2
 1 -1 7 1.06614 1.54223 2
 -1 1 -7 2.22871 1.85072 4
 -1 1 -7 1.22417 1.54491 2
 1 1 7 0.29906 1.91281 2
 3 -1 7 653.176 21.2858 3
 -3 -1 -7 616.19 21.2656 2
 3 -1 7 601.114 20.84 2
 3 1 7 596.929 21.1489 2
 -3 1 -7 575.756 20.8528 2
 -3 1 -7 617.999 21.3802 4
 5 -1 7 19.8829 3.19616 2
 5 -1 7 28.0827 2.47558 3
 5 -1 7 30.4148 3.99961 5
 -5 -1 -7 22.7382 3.72177 2
 5 1 7 24.3889 3.72969 2
 -5 1 -7 25.6089 4.00292 4
 -5 1 -7 24.9448 3.16377 2
 7 -1 7 152.335 7.66934 5
 -7 -1 -7 151.997 7.12856 2
 7 -1 7 147.562 6.74718 2
 7 -1 7 156.28 6.01514 3
 7 1 7 154.189 6.96858 5
 -7 1 -7 152.68 7.35056 4
 -7 1 -7 154.111 6.73329 2
 7 1 7 150.541 7.12462 2
 9 -1 7 238.235 10.7451 5
 9 -1 7 245.558 8.87206 3
 9 -1 7 239.593 9.59942 2
 -9 -1 -7 236.012 9.89071 2
 -9 1 -7 228.413 9.72932 2
 9 1 7 239.72 10.1448 5
 9 1 7 246.524 10.1057 2
 -11 -1 -7 166.627 8.20989 2
 11 -1 7 163.123 8.81075 5
 11 -1 7 167.22 7.83963 2
 11 1 7 168.298 8.30264 2
 -11 1 -7 165.675 7.86522 2
 11 1 7 158.534 7.79633 5
 13 -1 7 201.594 10.4768 2
 13 -1 7 240.529 11.6495 5
 -13 -1 -7 247.497 10.9636 2
 13 -1 7 251.29 10.5991 2
 13 1 7 255.609 10.7896 2
 13 1 7 230.818 10.6966 5
 -13 1 -7 254.056 10.7924 2
 15 -1 7 577.177 24.4307 5
 15 -1 7 613.981 22.657 2
 15 -1 7 624.872 22.4982 2
 -15 -1 -7 597.115 22.9311 2
 15 1 7 643.049 22.6136 2
 17 -1 7 -1.2188 3.60364 2
 -17 -1 -7 -4.6526 4.11511 2
 17 -1 7 -4.2803 3.49448 2
 17 1 7 -2.7081 3.30056 2
 17 1 7 1.74148 3.7161 2
 19 -1 7 3.4321 4.21234 2
 19 -1 7 6.64415 4.50781 2
 -19 -1 -7 4.52692 5.08753 2
 19 1 7 10.1906 4.22665 2
 19 1 7 7.78269 3.96279 2
 21 -1 7 -1.2537 4.55384 2
 21 1 7 2.82089 4.24471 2
 32 -2 -7 -4.7126 5.8014 2
 32 -2 -7 -0.7063 8.62407 6
 -32 2 7 -7.0219 7.96612 5
 32 2 -7 11.8012 4.96423 2
 30 -2 -7 -1.2412 7.30021 6
 30 -2 -7 -5.8937 4.85641 2
 30 -2 -7 1.00052 4.83471 2
 -30 2 7 -1.6737 7.22893 5
 30 2 -7 10.2057 4.84942 2
 -28 -2 7 22.4077 5.60789 5
 28 -2 -7 24.6639 6.51877 6
 28 2 -7 26.048 4.84827 2
 -28 2 7 21.5931 7.33851 5
 26 -2 -7 15.3504 4.20017 2
 26 -2 -7 22.7662 5.64059 6
 -26 2 7 19.1045 5.04324 2
 26 2 -7 19.1962 4.57579 2
 24 -2 -7 23.0821 5.03005 6
 24 -2 -7 13.0325 4.00244 2
 -24 2 7 12.8873 4.62184 2
 24 2 -7 10.5553 3.87342 2
 22 -2 -7 5.96724 3.61489 2
 22 -2 -7 14.6398 4.34781 6
 22 2 -7 10.9957 3.55381 2
 22 2 -7 14.3935 3.80557 2
 -22 2 7 18.7984 4.60812 2
 20 -2 -7 98.6088 6.50549 6
 20 -2 -7 86.7816 5.91689 2
 20 2 -7 104.752 6.39648 2
 20 2 -7 103.43 6.39389 2
 -20 2 7 97.3733 6.50064 2
 18 -2 -7 92.4352 5.95343 6
 18 -2 -7 92.0627 5.67215 2
 18 2 -7 100.036 5.87791 2
 -18 2 7 90.2156 5.98143 2
 18 2 -7 90.4333 5.80364 2
 16 -2 -7 49.3783 4.28575 2
 16 -2 -7 46.5721 4.70037 6
 -16 -2 7 54.9537 4.35767 2
 16 2 -7 50.3151 4.51997 2
 16 2 -7 49.9321 4.3867 2
 -16 2 7 53.5207 4.54488 2
 14 -2 -7 129.087 6.32543 2
 14 -2 -7 131.008 7.00247 6
 -14 -2 7 145.346 6.24568 2
 14 2 -7 138.845 6.33253 2
 -14 2 7 121.91 6.40784 2
 14 2 -7 144.247 6.27055 2
 -12 -2 7 28.9776 3.30098 2
 12 -2 -7 26.6678 3.544 2
 12 2 -7 37.9038 3.5081 2
 -12 2 7 27.4689 3.95099 2
 -12 2 7 28.2258 3.72964 6
 12 2 -7 25.6177 2.78237 6
 -10 -2 7 0.30488 1.74136 2
 10 -2 -7 1.64554 1.92303 2
 -10 2 7 1.72772 1.94524 2
 -10 2 7 1.09399 2.5895 6
 10 2 -7 1.85791 1.87068 6
 10 2 -7 2.04189 1.86973 2
 8 -2 -7 220.186 8.23238 2
 -8 -2 7 212.454 7.83274 2
 -8 -2 7 198.723 8.72813 6
 8 2 -7 213.434 8.48949 3
 8 2 -7 214.075 7.90057 2
 -8 2 7 214.038 8.33281 2
 6 -2 -7 229.938 8.74969 2
 -6 -2 7 220.822 9.52365 6
 -6 -2 7 229.859 8.15426 2
 6 2 -7 226.882 9.51285 1
 6 2 -7 232.063 8.17085 2
 6 2 -7 224.422 8.9172 3
 -6 2 7 234.085 8.84378 2
 -4 -2 7 57.9403 3.88539 1
 -4 -2 7 54.1565 2.722 2
 4 -2 -7 56.6451 3.70814 2
 4 -2 -7 57.7576 3.56981 1
 4 2 -7 51.8458 2.65464 2
 4 2 -7 55.2787 3.57509 3
 -4 2 7 54.9319 3.7424 2
 4 2 -7 52.8397 3.98527 1
 -2 -2 7 -0.1751 2.55476 1
 2 -2 -7 2.45171 2.03841 2
 -2 -2 7 2.34762 2.08298 3
 -2 -2 7 -1.5229 2.13251 4
 2 -2 -7 -2.2146 2.09544 1
 -2 -2 7 1.43148 1.03513 2
 -2 2 7 3.01765 1.9488 2
 2 2 -7 1.27369 1.95944 3
 2 2 -7 -1.2242 1.15805 2
 0 -2 -7 193.76 7.89766 2
 0 -2 7 183.25 7.95144 4
 0 -2 7 194.668 8.27975 1
 0 -2 7 203.253 7.78943 3
 0 -2 7 186.029 6.81595 2
 0 2 -7 179.682 6.78751 2
 0 2 7 189.383 7.85752 1
 0 2 -7 187.963 7.88357 4
 0 2 7 192.725 7.77527 2
 2 -2 7 333.218 11.7392 2
 2 -2 7 340.26 13.8215 5
 2 -2 7 346.847 12.5571 3
 -2 -2 -7 348.372 12.6899 2
 2 -2 7 335.406 12.7295 4
 -2 2 -7 319.101 11.7304 2
 -2 2 -7 331.473 12.6112 4
 2 2 7 340.402 12.5224 2
 2 2 7 346.091 13.1519 1
 4 -2 7 295.034 10.5304 2
 4 -2 7 303.424 11.1559 3
 -4 -2 -7 300.444 11.4375 2
 -4 -2 -7 290.267 10.6379 3
 4 -2 7 301.304 12.5001 5
 -4 2 -7 283.78 10.6134 2
 4 2 7 301.063 11.3739 2
 -4 2 -7 292.074 11.4019 4
 -6 -2 -7 82.6634 5.41037 2
 6 -2 7 73.4369 4.37518 3
 6 -2 7 74.3053 4.17161 2
 6 -2 7 79.5332 5.79025 5
 6 2 7 74.9919 5.14382 2
 -6 2 -7 70.4664 4.28105 2
 -6 2 -7 72.8031 5.13592 4
 8 -2 7 20.3699 3.28442 2
 8 -2 7 20.0611 2.65155 3
 -8 -2 -7 17.5383 3.21572 2
 8 -2 7 19.3776 2.66661 2
 8 -2 7 24.8426 3.72455 5
 -8 2 -7 14.1958 3.04343 4
 -8 2 -7 15.7964 2.82568 2
 8 2 7 15.6179 2.88831 5
 8 2 7 23.6316 3.45378 2
 10 -2 7 1.65879 2.4668 2
 10 -2 7 4.49668 2.42406 3
 -10 -2 -7 1.7937 3.10384 2
 10 -2 7 1.97261 2.62032 2
 10 -2 7 10.8532 3.79478 5
 10 2 7 4.65845 2.26793 5
 -10 2 -7 -0.9299 3.12314 4
 10 2 7 -0.5991 3.03898 2
 12 -2 7 4.09804 2.92727 2
 12 -2 7 7.18865 3.06573 2
 -12 -2 -7 10.5205 3.65966 2
 12 -2 7 10.853 4.13895 5
 12 2 7 11.8669 3.60418 2
 -12 2 -7 3.65264 3.61697 4
 14 -2 7 177.172 8.81391 2
 -14 -2 -7 185.895 9.75687 2
 14 -2 7 162.128 8.68952 2
 14 -2 7 186.981 10.87 5
 14 2 7 188.788 9.74779 2
 -14 2 -7 175.162 9.94197 4
 16 -2 7 10.4234 3.73395 2
 -16 -2 -7 7.28868 4.34624 2
 16 -2 7 11.284 3.95003 2
 16 2 7 12.1347 4.21998 2
 -16 2 -7 4.09084 4.28571 4
 18 -2 7 7.98737 4.22314 2
 -18 -2 -7 -0.4666 4.48024 2
 18 -2 7 12.8965 4.21577 2
 18 2 7 10.4552 4.15684 2
 18 2 7 9.53904 4.21004 2
 20 -2 7 8.63115 4.89404 2
 20 -2 7 9.61701 3.60218 3
 -20 -2 -7 -6.8202 4.90983 2
 -20 2 -7 -0.4413 4.88472 4
 31 -3 -7 8.70797 6.27354 2
 31 -3 -7 17.4022 9.81125 6
 31 3 -7 18.8842 5.18396 2
 31 3 -7 12.7366 7.47789 3
 29 -3 -7 19.5298 5.96437 2
 29 -3 -7 18.8747 5.60866 2
 29 3 -7 22.0285 6.87873 3
 29 3 -7 22.9807 4.62589 2
 27 -3 -7 13.0889 4.74066 2
 27 -3 -7 10.7975 4.91815 2
 27 -3 -7 17.5999 7.26037 6
 27 3 -7 1.86627 5.43418 3
 27 3 -7 10.8356 4.31886 2
 25 -3 -7 6.83697 4.07352 2
 25 -3 -7 7.25432 6.08186 6
 25 3 -7 3.17308 3.9163 2
 -25 3 7 -0.6998 4.90905 2
 25 3 -7 -8.4569 4.71339 3
 -25 3 7 1.11433 6.17032 5
 23 -3 -7 -6.2985 3.59093 2
 23 -3 -7 2.51409 5.06391 6
 23 3 -7 -4.6644 3.61938 2
 -23 3 7 -5.7069 4.62496 2
 23 3 -7 -3.0915 4.22439 3
 21 -3 -7 25.6714 5.26237 6
 21 3 -7 32.8905 4.43555 2
 -21 3 7 19.073 4.51547 2
 21 3 -7 32.0328 5.69465 3
 19 -3 -7 0.35827 3.88778 6
 19 3 -7 2.1753 3.1284 2
 19 3 -7 2.91768 3.28167 3
 -19 3 7 -5.4102 3.1734 2
 17 -3 -7 8.94099 2.87097 2
 17 -3 -7 10.1915 3.99391 6
 17 3 -7 10.8948 3.14316 2
 17 3 -7 16.406 3.13486 2
 17 3 -7 15.1697 3.32658 3
 -17 3 7 9.93648 3.30737 2
 15 -3 -7 253.121 10.1094 2
 15 -3 -7 253.47 11.6496 6
 15 3 -7 257.148 10.0185 2
 -15 3 7 239.722 10.0937 2
 15 3 -7 253.145 10.2798 2
 15 3 -7 245.826 10.4128 3
 13 -3 -7 1.09782 2.15886 2
 13 3 -7 -1.5512 2.66432 6
 13 3 -7 4.40809 2.21769 2
 -13 3 7 -0.0536 3.46197 6
 13 3 -7 4.39174 2.63401 3
 -13 3 7 5.26268 2.58652 2
 13 3 -7 -0.8487 2.28808 2
 11 -3 -7 8.63905 2.28213 2
 -11 3 7 6.7551 2.26599 2
 -11 3 7 8.04889 1.72497 4
 11 3 -7 6.8633 2.6703 3
 -11 3 7 6.33303 3.3936 6
 11 3 -7 11.0356 2.19448 2
 11 3 -7 7.4103 2.20416 2
 9 -3 -7 80.8348 4.52115 2
 9 3 -7 82.0987 4.98291 6
 -9 3 7 79.9709 4.81138 2
 9 3 -7 76.1615 4.99658 3
 9 3 -7 72.1359 5.59627 1
 -9 3 7 82.3761 5.8736 6
 9 3 -7 79.9123 4.16436 2
 9 3 -7 75.7637 4.10058 2
 -7 -3 7 52.4261 4.21741 6
 7 -3 -7 57.4599 4.1875 2
 7 3 -7 48.9111 3.12874 2
 7 3 -7 54.1063 4.3753 3
 -7 3 7 52.8989 3.9713 2
 7 3 -7 48.8592 3.20843 2
 7 3 -7 48.5256 4.80475 1
 -5 -3 7 213.283 9.0333 3
 5 -3 -7 196.096 9.61467 1
 -5 -3 7 220.876 9.80172 6
 5 -3 -7 238.241 8.91825 2
 5 3 -7 222.837 7.72956 2
 5 3 -7 201.893 7.71586 2
 -5 3 7 221.574 8.72055 2
 5 3 -7 232.634 9.73383 1
 5 3 -7 220.803 9.03823 3
 -3 -3 7 486.299 17.3677 3
 -3 -3 7 460.356 19.2265 6
 -3 -3 7 479.685 18.6403 1
 -3 -3 7 466.531 17.1859 4
 3 -3 -7 490.728 16.9317 2
 3 -3 -7 461.99 18.3303 1
 -3 3 7 467.927 16.9026 2
 3 3 -7 469.98 17.4096 3
 1 -3 -7 316.238 12.01 2
 -1 -3 7 300.898 12.2086 4
 -1 -3 7 312.158 13.1082 1
 -1 -3 7 307.147 13.096 5
 -1 -3 7 340.116 12.2529 3
 -1 -3 7 322.223 13.7379 6
 -1 3 7 309.87 11.9147 2
 1 -3 7 73.2509 4.91943 3
 1 -3 7 66.2853 5.88713 5
 1 -3 7 83.5941 5.45725 1
 -1 -3 -7 80.411 5.15716 2
 1 -3 7 73.406 5.19872 4
 1 3 7 84.3678 5.00597 2
 1 3 7 69.5137 4.92137 1
 3 -3 7 94.802 5.9402 4
 3 -3 7 87.8366 5.44114 3
 -3 -3 -7 97.9162 5.0137 3
 3 -3 7 91.6565 6.74795 5
 -3 -3 -7 103.758 5.89785 2
 -3 3 -7 106.235 5.86655 4
 3 3 7 103.779 5.84645 2
 3 3 7 104.174 5.63849 1
 -5 -3 -7 28.3578 3.17443 3
 5 -3 7 27.2775 2.62312 2
 5 -3 7 27.6577 2.71474 2
 5 -3 7 34.7771 4.34589 5
 5 -3 7 23.2916 3.99607 3
 -5 -3 -7 26.5536 4.59278 2
 5 3 7 26.2686 4.0926 1
 5 3 7 27.7945 3.49848 2
 -5 3 -7 29.5055 4.54977 4
 7 -3 7 42.056 4.30103 3
 7 -3 7 40.8775 5.68227 5
 7 -3 7 42.4219 3.48486 2
 7 -3 7 46.6518 3.62948 2
 -7 -3 -7 46.5233 5.42225 2
 7 3 7 33.2528 5.12246 2
 -7 3 -7 44.1675 5.10856 4
 -9 -3 -7 65.6599 6.33943 2
 9 -3 7 62.3622 4.96806 3
 9 -3 7 62.1296 4.49356 2
 9 -3 7 62.7438 4.83856 2
 9 -3 7 70.275 6.89761 5
 9 3 7 62.1914 6.1602 2
 -9 3 -7 62.6091 6.09554 4
 11 -3 7 31.1837 4.49892 2
 11 -3 7 32.2375 5.04269 5
 11 -3 7 26.8441 3.89595 3
 11 -3 7 30.4514 4.58639 2
 -11 -3 -7 30.9788 4.49302 2
 11 3 7 28.4809 4.3056 2
 -11 3 -7 25.0072 4.24927 4
 13 -3 7 39.3025 5.70184 3
 13 -3 7 42.1391 7.18385 5
 -13 -3 -7 39.9116 7.20527 2
 13 -3 7 38.4757 5.30325 2
 13 -3 7 40.1277 5.3762 2
 13 3 7 49.9111 6.54688 2
 -13 3 -7 34.6611 4.82893 4
 15 -3 7 90.6345 7.36115 2
 -15 -3 -7 100.422 8.56283 2
 15 -3 7 95.8582 7.34114 2
 15 -3 7 101.206 7.22753 3
 -15 3 -7 95.194 7.9764 4
 17 -3 7 1.72018 4.08278 3
 17 -3 7 1.87985 4.36272 2
 17 -3 7 3.04781 4.00765 2
 -17 -3 -7 -6.2871 4.33873 2
 17 3 7 4.02946 4.50942 2
 -17 3 -7 -1.0511 4.42671 4
 19 -3 7 -4.735 4.73606 2
 19 -3 7 2.76073 4.76837 2
 19 -3 7 0.663 4.33581 3
 -19 -3 -7 -5.6961 4.87284 2
 19 3 7 -1.2454 4.28499 2
 19 3 7 7.85169 4.44278 2
 28 -4 -7 24.0743 6.89898 2
 28 -4 -7 13.5121 5.83495 2
 28 -4 -7 21.7815 8.62243 6
 28 4 -7 25.0927 5.57034 2
 28 4 -7 25.7206 6.64355 3
 26 -4 -7 22.9255 7.38417 6
 26 -4 -7 13.6307 5.53651 2
 -26 4 7 13.2806 5.63475 2
 26 4 -7 18.1656 4.87404 2
 26 4 -7 17.7816 5.71966 3
 24 -4 -7 70.4021 8.08881 2
 24 -4 -7 71.6592 9.01411 6
 24 4 -7 65.4674 7.94539 3
 -24 4 7 58.222 9.65759 5
 24 4 -7 51.4347 7.74108 2
 22 -4 -7 50.1823 7.7432 6
 22 -4 -7 39.7841 6.87436 2
 22 4 -7 45.796 7.06195 2
 22 4 -7 54.0465 6.96137 3
 -22 4 7 54.585 7.46241 2
 20 -4 -7 177.82 9.85887 2
 20 -4 -7 176.089 11.095 6
 -20 4 7 194.658 9.73318 4
 20 4 -7 216.414 10.0795 2
 -20 4 7 185.074 12.1434 5
 20 4 -7 187.859 9.55793 3
 -20 4 7 190.257 9.90163 2
 18 -4 -7 39.4272 4.56195 2
 18 -4 -7 50.105 6.9596 6
 -18 4 7 38.0169 5.99404 2
 -18 4 7 55.4494 7.21906 5
 18 4 -7 50.6354 5.91976 2
 18 4 -7 40.6171 5.6774 3
 -18 4 7 47.3642 5.44723 4
 16 -4 -7 36.1213 5.08959 2
 16 -4 -7 43.9205 6.49701 6
 -16 4 7 40.9763 4.63218 4
 -16 4 7 39.4264 5.2466 2
 16 4 -7 40.5588 5.28605 2
 16 4 -7 44.0594 5.19528 3
 14 -4 -7 41.7021 4.50361 2
 -14 4 7 40.8074 4.24578 4
 -14 4 7 43.7022 5.77021 6
 14 4 -7 45.3358 4.98431 2
 -14 4 7 52.648 5.07407 2
 14 4 -7 46.1242 5.26479 6
 14 4 -7 39.8622 4.70118 3
 14 4 -7 49.4694 4.89593 2
 12 -4 -7 5.17708 2.49439 2
 12 4 -7 3.88765 2.62053 2
 12 4 -7 6.21828 3.85922 1
 12 4 -7 8.80168 3.54207 6
 -12 4 7 2.28853 2.81404 2
 -12 4 7 8.6516 4.24856 6
 12 4 -7 4.95963 2.69869 2
 12 4 -7 1.84738 2.93425 3
 10 -4 -7 6.38232 2.45611 2
 10 4 -7 4.2672 3.50236 6
 10 4 -7 8.27068 3.73975 1
 10 4 -7 6.31349 2.37119 2
 10 4 -7 9.3976 2.37742 2
 10 4 -7 5.6884 2.92716 3
 -10 4 7 -0.3772 4.24564 6
 -10 4 7 7.39868 2.51949 2
 8 -4 -7 6.29144 2.45564 2
 -8 4 7 -0.6681 4.45648 6
 8 4 -7 -0.9197 3.54745 6
 8 4 -7 2.43541 1.96376 2
 8 4 -7 4.28571 1.9921 2
 8 4 -7 5.5923 2.96656 3
 8 4 -7 7.35458 3.85814 1
 -6 -4 7 221.364 9.8444 3
 -6 -4 7 220.453 10.5273 6
 6 -4 -7 238.76 9.26355 2
 -6 -4 7 221.006 10.1143 5
 6 4 -7 202.141 8.10146 2
 -6 4 7 238.484 9.31979 2
 -6 4 7 220.342 11.2456 6
 6 4 -7 221.572 9.65693 3
 6 4 -7 232.851 10.3944 1
 -4 -4 7 1178.66 45.5399 1
 -4 -4 7 1171.52 47.1051 6
 4 -4 -7 1231.08 41.2444 2
 4 -4 -7 1206.47 45.3301 1
 -4 -4 7 1239.14 42.6852 3
 -4 -4 7 1185.8 45.0986 5
 -4 4 7 1251.88 41.2663 2
 -2 -4 7 407.502 16.2969 5
 -2 -4 7 387.554 16.9488 6
 -2 -4 7 430.032 15.4498 3
 2 -4 -7 398.649 14.7376 2
 -2 -4 7 405.074 15.1244 4
 2 -4 -7 369.461 16.172 1
 -2 -4 7 348.84 16.5211 1
 -2 4 7 423.939 15.0226 2
 0 -4 7 122.609 7.84778 5
 0 -4 7 135.988 7.00282 3
 0 -4 -7 144.567 6.88771 2
 0 -4 7 109.614 7.58191 1
 0 -4 7 131.581 7.32289 4
 0 -4 7 131.335 7.88737 6
 0 4 7 150.134 7.05508 2
 -2 -4 -7 142.242 7.14095 2
 2 -4 7 127.598 8.00333 5
 2 -4 7 129.73 7.33442 4
 2 -4 7 130.774 6.90766 3
 -2 -4 -7 120.165 6.73713 3
 2 -4 7 126.498 7.61816 1
 2 -4 7 135.45 8.24657 6
 2 4 7 126.158 7.1961 1
 2 4 7 134.036 7.0186 2
 4 -4 7 167.025 7.97986 3
 4 -4 7 156.065 8.87036 5
 4 -4 7 159.355 8.24582 4
 -4 -4 -7 155.572 8.16202 2
 4 -4 7 157.906 8.62907 1
 4 -4 7 155.006 9.66142 6
 -4 -4 -7 149.259 7.38875 3
 4 4 7 141.651 7.92847 2
 4 4 7 153.491 8.08165 1
 -6 -4 -7 80.3325 6.64293 2
 -6 -4 -7 72.6478 5.38788 3
 6 -4 7 72.9843 7.54398 6
 6 -4 7 87.211 7.59168 5
 6 -4 7 76.5358 5.9405 3
 6 4 7 69.8175 6.25046 2
 -6 4 -7 72.2117 6.04283 4
 6 4 7 79.3707 6.35702 1
 -8 -4 -7 50.2934 6.68839 2
 8 -4 7 58.8713 7.04861 5
 8 -4 7 41.3963 7.44097 6
 8 -4 7 55.1618 5.73172 3
 -8 4 -7 47.0011 6.3568 4
 8 4 7 43.6897 6.06087 2
 8 4 7 57.2036 6.22816 1
 10 -4 7 1.62043 3.61194 3
 -10 -4 -7 2.99395 4.0621 2
 10 -4 7 4.52661 4.83398 5
 10 -4 7 -0.3521 2.59347 2
 10 4 7 -1.252 3.6431 2
 -10 4 -7 -2.0381 3.74879 4
 10 4 7 6.61559 4.785 1
 -12 -4 -7 5.33988 4.51011 2
 12 -4 7 10.0664 5.12271 5
 12 -4 7 3.27854 3.82998 3
 -12 4 -7 6.46873 3.92129 4
 12 4 7 12.4484 4.04096 2
 14 -4 7 12.1629 4.59428 3
 -14 -4 -7 22.2769 5.13608 2
 -14 4 -7 10.8986 4.40236 4
 16 -4 7 -0.0034 4.86792 3
 -16 -4 -7 -3.4659 4.57389 2
 -16 4 -7 -5.2227 4.37509 4
 18 -4 7 5.58817 5.14287 3
 18 -4 7 5.86739 5.19051 2
 18 4 7 8.29351 4.34915 2
 -18 4 -7 2.96542 4.92483 4
 27 -5 -7 7.92577 6.91381 2
 27 -5 -7 -16.766 9.45471 6
 -27 5 7 16.0474 7.28772 2
 27 5 -7 -9.2974 5.71036 2
 -27 5 7 -0.525 7.44401 4
 25 -5 -7 -10.511 8.31815 6
 25 5 -7 0.32288 5.38885 2
 25 5 -7 10.1194 5.97756 3
 -25 5 7 0.31902 6.22244 4
 23 -5 -7 37.6644 8.68892 6
 23 -5 -7 19.293 5.6099 2
 -23 5 7 19.9898 5.96109 4
 -23 5 7 30.5901 6.5367 2
 23 5 -7 24.5152 5.58585 2
 23 5 -7 25.1423 5.95015 3
 21 -5 -7 14.3698 7.17479 6
 21 5 -7 10.0728 4.9405 3
 -21 5 7 10.171 4.94216 4
 21 5 -7 7.62195 5.12287 2
 19 -5 -7 11.3288 6.80682 6
 -19 5 7 17.97 4.4523 4
 -19 5 7 5.09907 4.89723 2
 19 5 -7 12.9793 6.12546 6
 19 5 -7 21.325 5.1342 2
 -19 5 7 29.5585 7.11733 5
 19 5 -7 19.8256 5.02219 3
 -17 5 7 2.62457 6.40122 5
 -17 5 7 2.86023 3.80317 4
 17 5 -7 7.32502 5.41533 1
 17 5 -7 5.37615 4.12764 2
 17 5 -7 2.65125 5.32262 6
 17 5 -7 4.3096 4.14131 3
 -17 5 7 -6.7334 4.15933 2
 15 5 -7 15.1606 4.20526 3
 15 5 -7 15.5206 5.35047 6
 -15 5 7 10.4781 6.25115 5
 15 5 -7 20.1563 5.5135 1
 -15 5 7 8.02757 3.91509 2
 15 5 -7 15.9232 3.97779 2
 -13 -5 7 20.181 4.26008 5
 13 5 -7 15.868 3.71954 2
 13 5 -7 20.1877 5.11128 6
 13 5 -7 20.9007 5.05777 1
 -13 5 7 16.5537 4.1271 2
 13 5 -7 15.1134 4.11367 3
 -13 5 7 7.62065 6.12737 5
 -13 5 7 9.75954 5.8685 6
 11 -5 -7 37.0922 4.97088 2
 -11 5 7 38.1055 6.21575 6
 -11 5 7 37.122 6.29969 5
 11 5 -7 41.1836 6.3725 1
 11 5 -7 32.4933 5.59082 3
 11 5 -7 34.724 6.12689 6
 11 5 -7 33.9959 4.71478 2
 -11 5 7 37.0678 5.00191 2
 -9 -5 7 15.1432 4.25342 5
 9 -5 -7 20.2365 4.59912 1
 9 5 -7 9.45126 2.7482 2
 -9 5 7 12.8937 3.27921 2
 9 5 -7 11.0164 3.65123 3
 9 5 -7 20.2819 4.74735 6
 -9 5 7 12.5574 5.6925 6
 9 5 -7 10.772 4.37478 1
 7 -5 -7 7.01315 4.55531 1
 -7 -5 7 17.9919 4.20432 3
 -7 -5 7 21.6274 4.31008 5
 -7 5 7 23.5325 5.67184 6
 7 5 -7 17.3342 2.45647 2
 5 -5 -7 12.1987 4.79013 1
 -5 -5 7 11.9758 4.02934 3
 -5 5 7 17.5182 5.92405 6
 -3 -5 7 73.5487 6.87121 6
 3 -5 -7 58.4238 6.34377 1
 3 -5 -7 81.2458 6.02932 2
 -3 -5 7 67.115 6.28245 4
 -3 -5 7 53.3551 7.02821 1
 -3 -5 7 82.7848 7.20347 5
 -3 -5 7 58.1648 6.17353 3
 -3 5 7 82.8071 6.00155 2
 1 -5 -7 35.8077 5.14359 2
 -1 -5 7 37.6484 6.61703 6
 -1 -5 7 45.7274 6.77863 5
 -1 -5 -7 2.02456 3.77013 3
 1 -5 7 3.97945 3.81484 3
 -1 -5 -7 12.8226 3.88264 2
 1 -5 7 10.583 4.96706 6
 1 -5 7 14.2133 4.60686 5
 1 -5 7 12.6984 3.76699 4
 1 5 7 8.66844 3.65051 2
 3 -5 7 -1.9708 4.72262 1
 3 -5 7 8.48472 4.86993 5
 3 -5 7 4.224 3.88616 3
 3 -5 7 18.8288 5.58242 6
 -3 -5 -7 15.4543 4.04687 2
 3 -5 7 13.8208 4.30334 4
 -3 -5 -7 3.13683 3.75981 3
 3 5 7 7.80144 3.00651 5
 3 5 7 9.93091 4.31643 1
 3 5 7 10.3289 3.50178 2
 -5 -5 -7 27.4501 4.7008 2
 -5 -5 -7 15.1194 4.27001 3
 5 -5 7 25.7002 5.34447 1
 5 -5 7 27.2989 6.43062 6
 5 -5 7 19.4014 5.42093 5
 5 5 7 25.7077 5.0898 1
 -7 -5 -7 2.05408 4.49614 2
 7 -5 7 9.84479 5.10828 5
 7 -5 7 2.3527 4.10714 3
 7 -5 7 6.83644 5.00783 1
 -7 -5 -7 5.21288 3.91877 3
 7 -5 7 12.9576 6.56077 6
 7 5 7 7.36923 5.06877 1
 9 -5 7 10.9639 5.36694 5
 9 -5 7 -0.3979 4.36359 3
 9 -5 7 8.68452 6.04592 6
 -9 -5 -7 -0.7886 4.30571 2
 -9 5 -7 -0.0138 3.81403 4
 9 5 7 2.41248 5.2281 1
 11 -5 7 -3.7818 4.54022 3
 11 -5 7 6.31454 6.58161 6
 -11 -5 -7 10.8056 4.86918 2
 -11 5 -7 3.21896 4.28921 4
 11 5 7 8.24173 5.72326 1
 13 -5 7 -0.4536 4.85046 3
 13 5 7 2.91468 4.3362 2
 13 5 7 2.26498 6.16327 1
 -13 5 -7 0.81924 4.6154 4
 -15 -5 -7 3.12911 5.12329 2
 15 -5 7 2.10126 5.27404 3
 -15 5 -7 7.32112 5.28263 4
 15 5 7 -0.3972 6.94994 1
 17 -5 7 2.11352 6.19209 3
 -17 -5 -7 -6.5743 5.7461 2
 17 -5 7 -10.664 7.14595 6
 17 5 7 -7.9937 8.16711 1
 -17 5 -7 10.2261 5.87323 4
 24 -6 -7 109.14 12.8286 6
 24 6 -7 116.862 12.2487 2
 24 6 -7 83.9624 9.60178 1
 -24 6 7 115.426 11.8695 4
 24 6 -7 82.6957 13.1907 6
 22 6 -7 80.3292 9.99104 2
 -22 6 7 86.7901 9.76106 2
 22 6 -7 79.73 8.88937 1
 -22 6 7 75.5628 10.0328 4
 22 6 -7 84.9973 9.42366 3
 -20 6 7 34.5636 7.99675 5
 -20 6 7 25.0077 6.13298 4
 20 6 -7 36.4541 6.51886 2
 20 6 -7 33.3758 6.04514 3
 20 6 -7 32.3829 6.50625 1
 20 6 -7 39.31 9.12776 6
 18 6 -7 -3.3101 5.45936 2
 18 6 -7 4.58691 5.32264 1
 18 6 -7 1.24436 4.67376 3
 18 6 -7 2.29239 7.61111 6
 16 6 -7 4.74239 6.80249 6
 16 6 -7 7.65053 5.35729 1
 16 6 -7 -1.5848 4.99349 2
 16 6 -7 -1.8603 4.4426 3
 -14 6 7 14.6964 7.05969 6
 -14 6 7 7.21514 4.81249 2
 14 6 -7 5.68162 5.74876 1
 14 6 -7 0.03742 6.44567 6
 14 6 -7 4.06389 4.29373 2
 -14 6 7 12.1581 6.84804 5
 12 -6 -7 24.1878 5.44732 1
 -12 6 7 4.27478 6.94033 6
 12 6 -7 16.154 4.27769 2
 -12 6 7 14.3353 4.9049 2
 12 6 -7 18.9945 6.03678 6
 12 6 -7 23.0417 5.47708 1
 10 -6 -7 0.30554 5.12993 1
 -10 6 7 -8.9602 5.90136 5
 10 6 -7 -4.7839 4.8472 1
 -10 6 7 2.26789 4.07386 2
 10 6 -7 -1.0082 3.53315 2
 -10 6 7 -3.2466 6.57131 6
 10 6 -7 2.69101 5.53158 6
 -8 -6 7 -3.9327 5.06172 5
 8 -6 -7 0.88758 3.80387 2
 8 -6 -7 1.77757 5.16886 1
 -8 -6 7 -2.5672 4.40472 3
 -8 6 7 2.17755 5.46822 5
 8 6 -7 7.51204 5.74306 6
 8 6 -7 0.03841 4.56508 1
 -8 6 7 -2.057 3.76064 2
 -6 -6 7 5.21879 5.75299 5
 6 -6 -7 5.35855 5.26161 1
 -6 -6 7 5.8501 4.7666 3
 6 -6 -7 4.04048 3.98604 2
 -6 6 7 1.146 5.35145 5
 -6 6 7 8.41491 3.89141 2
 -6 6 7 -9.6297 6.91992 6
 -4 -6 7 164.956 9.18748 4
 -4 -6 7 159.559 10.4866 5
 4 -6 -7 158.322 9.92647 1
 4 -6 -7 164.555 8.73326 2
 -4 -6 7 146.182 9.99905 1
 -4 -6 7 144.845 9.19804 3
 -4 6 7 135.865 9.41094 5
 -4 6 7 141.169 11.1178 6
 -2 -6 7 35.3587 6.10125 1
 -2 -6 7 36.7774 6.51228 5
 -2 -6 7 53.6894 8.14255 6
 2 -6 -7 35.2357 6.83031 1
 -2 -6 7 26.3877 5.17249 3
 -2 -6 7 42.1101 6.9862 4
 -2 6 7 33.4489 5.25383 5
 -2 6 7 32.6796 7.08403 6
 -2 6 7 44.06 6.61884 2
 0 -6 7 7.80363 4.67314 4
 0 -6 -7 -5.5109 4.35407 3
 0 -6 7 0.58784 6.066 6
 0 -6 -7 5.98668 4.55237 2
 0 -6 7 4.02041 6.07078 5
 0 6 7 3.58685 4.19256 5
 2 -6 7 41.04 7.57741 1
 2 -6 7 61.8974 7.70985 4
 2 -6 7 39.3957 7.10644 3
 -2 -6 -7 65.8971 8.16264 2
 -2 -6 -7 36.8176 6.90417 3
 2 -6 7 50.7479 8.46866 6
 2 6 7 54.3487 5.59844 5
 4 -6 7 72.246 7.85423 1
 4 -6 7 83.6581 9.78894 6
 -4 -6 -7 70.8683 7.80948 3
 -4 -6 -7 95.2793 8.71142 2
 4 -6 7 64.5342 8.28395 4
 4 -6 7 96.737 8.15475 3
 4 6 7 75.369 5.41335 5
 4 6 7 86.9888 7.9622 1
 4 6 7 86.8789 8.34688 2
 6 -6 7 49.2941 8.08928 5
 6 -6 7 30.9872 6.18012 1
 6 -6 7 36.4968 6.61426 3
 -6 -6 -7 31.3819 5.97022 3
 -6 -6 -7 34.5912 6.32858 2
 6 -6 7 39.4008 8.98359 6
 6 6 7 30.4568 6.3156 1
 6 6 7 24.2502 5.18384 2
 -8 -6 -7 28.6053 6.22094 2
 8 -6 7 25.4177 5.98389 1
 -8 -6 -7 18.3386 5.41959 3
 8 -6 7 14.4996 5.20438 3
 8 6 7 19.4762 6.3112 1
 8 6 7 16.7974 5.22798 2
 10 -6 7 19.8769 8.49639 6
 -10 -6 -7 5.32969 5.50045 2
 10 -6 7 0.54123 5.46266 3
 10 -6 7 8.50755 5.87019 1
 10 6 7 2.87693 6.34588 1
 -12 -6 -7 14.7674 6.4189 2
 12 -6 7 23.6941 7.11564 1
 12 -6 7 10.1665 6.3162 3
 12 6 7 14.7951 7.53107 1
 -14 -6 -7 0.55417 6.59325 2
 14 -6 7 -4.4567 6.51201 3
 14 6 7 13.398 8.53416 1
 -19 7 7 4.00962 7.57619 5
 19 7 -7 4.88961 7.54227 2
 19 7 -7 -1.2029 6.37569 1
 17 -7 -7 17.611 6.2068 1
 17 7 -7 6.13603 6.97029 2
 17 7 -7 -3.3325 9.57145 6
 17 7 -7 3.44715 5.92422 1
 -17 7 7 2.33557 7.26484 5
 15 -7 -7 14.6943 5.88937 1
 15 7 -7 -1.3753 9.01294 6
 15 7 -7 -3.5147 6.14135 2
 15 7 -7 11.737 5.58959 1
 13 -7 -7 9.9767 5.99106 1
 13 7 -7 -5.9478 5.33796 2
 13 7 -7 0.44626 4.97325 1
 13 7 -7 10.9951 7.83026 6
 -13 7 7 10.7689 7.54081 6
 11 -7 -7 12.113 5.66971 1
 11 -7 -7 6.84782 5.37032 2
 11 7 -7 3.40863 4.812 2
 -11 7 7 0.82047 6.81817 6
 11 7 -7 6.22392 7.39062 6
 11 7 -7 5.70227 5.44247 1
 -9 -7 7 28.1074 5.79988 3
 9 -7 -7 29.5767 6.70207 1
 9 7 -7 36.7184 8.49472 6
 -9 7 7 30.6725 7.58873 6
 9 7 -7 33.5399 6.16129 1
 -9 7 7 22.7249 7.11586 5
 -7 -7 7 5.95627 5.26466 3
 7 -7 -7 5.84017 5.7395 1
 7 -7 -7 12.7408 5.342 2
 -7 7 7 9.15439 6.22391 5
 -7 7 7 4.40138 8.32436 6
 5 -7 -7 4.96775 5.75594 1
 5 -7 -7 18.6861 5.57044 2
 -5 -7 7 7.85032 5.14213 4
 -5 -7 7 6.80898 5.09905 3
 -5 7 7 4.62525 6.0467 5
 -5 7 7 13.1217 8.09567 6
 -5 7 7 7.86197 4.96355 2
 -3 -7 7 19.6055 5.91377 1
 -3 -7 7 11.8957 7.51881 5
 3 -7 -7 15.4687 5.34893 3
 -3 -7 7 14.0369 5.60798 4
 -3 -7 7 14.4165 5.56619 3
 3 -7 -7 19.2838 6.40577 1
 -3 7 7 8.91871 5.69563 5
 -1 -7 7 17.1785 5.72708 4
 -1 -7 7 8.72755 5.87353 1
 1 -7 -7 16.1383 5.47464 3
 -1 -7 7 12.2512 5.42784 3
 -1 7 7 23.4197 7.45842 6
 -1 7 7 11.937 5.59456 5
 1 -7 7 14.4954 7.56717 6
 -1 -7 -7 1.01821 5.44485 3
 1 -7 7 3.82481 5.37643 1
 1 -7 7 16.9439 5.5769 4
 1 -7 7 6.82148 5.41588 3
 1 7 7 9.58811 7.48606 6
 3 -7 7 2.80487 5.74407 1
 3 -7 7 1.78503 5.87216 3
 -3 -7 -7 17.7924 6.95298 2
 3 -7 7 17.0781 8.30327 6
 -3 -7 -7 0.49959 5.82825 3
 3 -7 7 9.74784 6.23963 4
 -5 -7 -7 9.30539 6.53947 2
 5 -7 7 5.32139 5.48647 3
 -5 -7 -7 -2.5949 6.35716 3
 5 -7 7 5.0897 6.30702 1
 7 -7 7 19.7658 6.4145 1
 7 -7 7 20.099 6.18308 3
 -7 -7 -7 16.0267 6.8194 3
 7 -7 7 11.8235 9.06963 6
 -7 -7 -7 38.1311 7.81305 2
 7 7 7 20.067 7.09002 1
 -9 -7 -7 19.8248 7.72887 2
 9 -7 7 8.67067 6.51326 3
 9 -7 7 19.7668 7.03034 1
 9 -7 7 5.81741 8.57533 6
 9 7 7 13.5798 7.70225 1
 12 -8 -7 3.9933 6.83283 1
 12 8 -7 4.48347 5.67314 1
 -12 8 7 14.5843 7.97999 6
 10 -8 -7 4.00238 6.72796 1
 8 -8 -7 4.69808 7.14652 2
 -8 -8 7 0.26338 7.24989 4
 -8 -8 7 6.10696 5.66459 3
 8 -8 -7 -3.9321 6.5235 1
 -6 -8 7 18.5639 7.37763 4
 6 -8 -7 32.5637 7.4136 2
 6 -8 -7 9.80828 7.79063 1
 -6 -8 7 19.7951 5.72698 3
 6 -8 -7 22.7331 6.2027 3
 -6 8 7 16.7679 9.6199 6
 4 -8 -7 60.8278 8.52373 3
 4 -8 -7 78.9438 11.2472 2
 -4 8 7 61.3039 11.404 6
 -4 8 7 63.2773 11.0125 5
 -2 -8 7 17.9033 7.73514 4
 -2 -8 7 27.2564 6.16179 3
 2 -8 -7 13.2994 6.69551 4
 2 -8 -7 18.704 6.53076 3
 2 -8 -7 24.7035 8.20006 2
 -2 8 7 21.3311 7.5733 5
 -2 8 7 19.8611 8.71108 6
 0 -8 -7 4.85576 6.77555 3
 0 -8 7 22.8152 6.39135 3
 0 -8 7 9.34444 6.58748 1
 0 -8 -7 -3.9685 6.18916 4
 0 -8 -7 24.938 9.22692 2
 0 -8 7 1.44889 7.53797 4
 2 -8 7 18.4734 6.78552 1
 -2 -8 -7 17.4776 7.94831 3
 -2 -8 -7 30.7228 9.50686 2
 2 -8 7 18.174 8.59194 4
 2 -8 7 33.7103 6.75605 3
 32 0 -8 87.8275 9.55974 2
 30 0 -8 162.794 10.4033 2
 28 0 -8 0.36671 3.79581 2
 26 0 -8 20.3874 4.09068 2
 26 0 -8 19.2785 4.44682 2
 -26 0 8 18.6794 4.39051 2
 -24 0 8 27.3941 4.47338 2
 24 0 -8 25.8794 4.23246 2
 24 0 -8 22.0657 4.05398 2
 22 0 -8 50.1161 5.35905 2
 -22 0 8 46.5097 5.54072 2
 -20 0 8 15.3512 3.38479 2
 20 0 -8 16.6158 3.12603 2
 18 0 -8 30.0322 4.13203 2
 -18 0 8 26.5786 4.46002 2
 -16 0 8 49.4741 4.13951 2
 16 0 -8 51.1325 3.14876 6
 14 0 -8 137.35 6.87576 2
 -14 0 8 150.717 7.02269 2
 14 0 -8 178.634 6.47481 6
 12 0 -8 691.719 24.1687 2
 -12 0 8 715.445 24.2257 2
 10 0 -8 532.908 18.596 2
 -10 0 8 540.492 18.6403 2
 -8 0 8 165.969 6.59057 2
 8 0 -8 165.595 6.59548 2
 -6 0 8 9.43776 1.77944 2
 6 0 -8 13.9037 1.91321 2
 -4 0 8 1077.2 37.3932 4
 -4 0 8 1123.33 37.3303 2
 4 0 -8 1125.85 37.3462 2
 2 0 -8 492.622 16.415 2
 -2 0 8 440.853 16.3164 4
 2 0 -8 474.327 16.3665 4
 -2 0 8 477.078 16.3448 2
 0 0 8 33.9622 3.01003 2
 0 0 -8 31.8614 3.0402 4
 0 0 -8 31.2523 2.94465 2
 2 0 8 1071.31 36.6234 2
 -2 0 -8 1091.02 36.9222 4
 -2 0 -8 1090.07 36.7264 2
 -4 0 -8 579.389 20.283 2
 4 0 8 579.561 20.2072 2
 6 0 8 15.1178 2.6569 2
 6 0 8 16.936 2.90593 5
 -6 0 -8 11.1352 2.4911 2
 -8 0 -8 31.1587 4.33033 2
 8 0 8 25.081 4.17329 2
 8 0 8 23.2145 4.14675 5
 10 0 8 42.5022 5.13339 2
 -10 0 -8 31.9215 5.12924 2
 10 0 8 25.5914 4.87861 5
 12 0 8 95.9652 6.77487 2
 12 0 8 73.0936 6.85554 5
 -12 0 -8 82.3647 6.55313 2
 14 0 8 67.4208 6.47143 2
 -14 0 -8 55.3572 6.53598 2
 14 0 8 51.9877 6.33413 5
 16 0 8 29.6895 4.35817 2
 16 0 8 23.8115 4.32881 2
 -16 0 -8 17.352 4.59431 2
 18 0 8 46.5361 5.58263 2
 18 0 8 39.171 6.90246 2
 20 0 8 8.59954 4.84844 2
 33 -1 -8 -1.7782 8.36419 6
 33 -1 -8 -2.8736 5.00155 2
 33 1 -8 20.4483 5.67697 2
 31 -1 -8 7.70055 4.94832 2
 31 1 -8 4.12246 4.8853 2
 29 -1 -8 8.04705 4.45648 2
 -29 -1 8 3.99378 5.87082 5
 29 1 -8 6.00112 4.17602 2
 -29 1 8 3.98273 6.50893 5
 27 -1 -8 17.4922 4.25765 2
 27 -1 -8 17.3288 4.3217 2
 -27 1 8 16.5762 4.56577 2
 27 1 -8 20.2194 4.33265 2
 27 1 -8 28.4538 4.59942 2
 25 -1 -8 -6.3287 3.93788 6
 25 1 -8 -1.5453 3.52636 2
 25 1 -8 -3.9015 3.55999 2
 -25 1 8 -3.4766 4.00564 2
 23 -1 -8 -5.9345 3.33026 6
 23 1 -8 -4.3122 3.06829 2
 -23 1 8 -5.6289 3.6228 2
 21 -1 -8 45.6437 4.50744 6
 -21 -1 8 42.3561 5.12073 2
 21 -1 -8 33.553 4.8877 2
 21 1 -8 41.1177 5.25479 2
 21 1 -8 44.9445 4.97841 2
 -21 1 8 48.2661 5.53017 2
 19 -1 -8 3.33471 2.46809 2
 -19 -1 8 1.30727 2.82564 2
 19 -1 -8 4.09906 2.6293 6
 -19 1 8 0.47947 2.85202 2
 19 1 -8 3.47297 2.64457 2
 17 -1 -8 46.5107 3.82348 6
 17 -1 -8 46.4831 4.13131 2
 -17 -1 8 44.6557 4.54622 2
 -17 1 8 35.1353 4.41981 2
 17 1 -8 40.293 4.39462 2
 -15 -1 8 62.9252 4.74216 2
 15 -1 -8 62.2236 4.2489 6
 15 -1 -8 65.1293 4.6138 2
 -15 1 8 52.0814 4.90248 2
 15 1 -8 69.4955 4.65184 2
 -13 -1 8 17.9855 2.49506 2
 13 -1 -8 14.5216 2.49723 2
 13 1 -8 18.4056 2.48795 2
 -13 1 8 12.7521 2.59653 2
 11 -1 -8 1.5497 1.90411 2
 -11 -1 8 1.32871 1.85741 2
 -11 1 8 -1.0003 1.88948 6
 11 1 -8 1.98756 1.84941 2
 -11 1 8 2.38424 1.84001 2
 -9 -1 8 4.30674 1.30167 6
 -9 -1 8 7.30704 1.80686 2
 9 -1 -8 8.72821 1.91592 2
 9 1 -8 8.26238 1.80548 2
 -9 1 8 6.26321 1.88286 2
 7 -1 -8 22.4115 2.8048 2
 -7 -1 8 25.7235 2.60134 2
 -7 1 8 24.3128 3.02692 2
 7 1 -8 22.6548 2.54739 2
 -5 -1 8 10.1318 1.55625 2
 5 -1 -8 9.44392 2.09492 2
 5 1 -8 10.3795 1.60835 2
 -5 1 8 8.74356 1.28979 4
 5 1 -8 12.0699 2.14126 1
 -5 1 8 10.1641 1.98144 2
 -3 -1 8 24.5733 2.41131 2
 3 -1 -8 33.6051 2.38597 4
 -3 -1 8 33.7939 2.6393 1
 -3 -1 8 27.8314 3.35986 4
 3 -1 -8 30.4239 3.19198 2
 3 1 -8 37.8392 2.75256 3
 -3 1 8 34.9548 3.05242 2
 3 1 -8 28.7551 2.42558 2
 -1 -1 8 5.33877 2.02675 1
 -1 -1 8 4.26602 2.14475 4
 1 -1 -8 6.26236 2.0761 2
 -1 -1 8 6.59166 1.61891 2
 1 1 -8 7.17361 1.91525 4
 1 1 -8 7.69081 1.69577 3
 1 1 -8 5.21063 1.56573 2
 -1 1 8 6.63651 1.99615 2
 -1 -1 -8 3.94954 2.18953 2
 1 -1 8 5.15889 1.81789 2
 -1 1 -8 1.61443 2.06683 4
 1 1 8 5.44138 2.23361 2
 -1 1 -8 3.45413 1.76959 2
 -3 -1 -8 12.2286 2.50941 2
 3 1 8 7.64494 2.36582 2
 -3 1 -8 7.50282 2.40968 4
 -5 -1 -8 89.8314 5.23441 2
 5 -1 8 91.1777 3.9388 3
 5 -1 8 82.6918 4.59432 2
 5 -1 8 84.8477 5.45717 5
 -5 1 -8 79.2623 4.57751 2
 5 1 8 86.1969 5.11764 2
 -5 1 -8 79.8833 5.17306 4
 7 -1 8 113.62 6.70808 5
 7 -1 8 124.595 5.88093 2
 7 -1 8 121.379 4.90054 3
 -7 -1 -8 113.22 6.28648 2
 7 1 8 111.243 5.90985 5
 7 1 8 118.906 6.28468 2
 -7 1 -8 112.797 5.84959 2
 -7 1 -8 110.697 6.4876 4
 9 -1 8 11.3612 3.59372 5
 -9 -1 -8 9.01488 2.94708 2
 9 -1 8 9.37679 2.90284 2
 9 1 8 11.8522 2.95525 5
 -9 1 -8 10.4043 3.20924 4
 -9 1 -8 11.4242 2.97476 2
 9 1 8 12.2299 3.15338 2
 11 -1 8 13.1951 3.8432 5
 -11 -1 -8 17.3186 3.62589 2
 11 -1 8 19.9304 3.55298 2
 11 1 8 17.1037 3.62226 2
 -11 1 -8 13.0934 3.26381 2
 11 1 8 15.7467 3.30532 5
 13 -1 8 7.5176 3.53391 2
 13 -1 8 11.6657 3.46901 2
 13 -1 8 6.23135 4.01735 5
 13 1 8 13.4632 3.50319 5
 15 -1 8 4.84107 4.26995 5
 15 -1 8 7.1849 3.72778 2
 -15 -1 -8 0.92414 3.9038 2
 15 -1 8 7.75678 3.67801 2
 -17 -1 -8 0.98434 4.66311 2
 17 -1 8 9.38073 4.23336 2
 17 -1 8 11.2513 4.10941 2
 17 1 8 12.6426 4.17179 2
 19 -1 8 -3.8891 4.58615 2
 19 -1 8 -5.9235 4.66865 2
 19 1 8 -0.387 3.99899 2
 21 -1 8 -9.984 4.89962 2
 21 1 8 2.74569 4.89015 2
 21 1 8 -6.0983 4.47408 2
 32 -2 -8 17.009 5.75781 2
 32 -2 -8 35.6754 8.89141 6
 32 2 -8 30.7868 5.50882 2
 -32 2 8 27.9492 8.66919 5
 30 -2 -8 69.2201 8.25854 2
 30 2 -8 85.5087 8.20822 2
 28 -2 -8 10.2058 4.45555 2
 28 -2 -8 4.7681 4.09109 2
 28 -2 -8 10.9204 6.13844 6
 28 2 -8 18.3466 4.77405 2
 -28 2 8 7.23272 5.01893 2
 26 -2 -8 23.1656 4.40412 2
 26 -2 -8 36.6247 7.06841 6
 26 2 -8 22.4018 4.4232 2
 26 2 -8 29.3162 4.56996 2
 -26 2 8 20.7142 5.04217 2
 24 -2 -8 11.2631 3.64039 2
 24 -2 -8 19.7989 4.82978 6
 24 2 -8 18.4903 4.12901 2
 -24 2 8 21.3418 4.69981 2
 22 -2 -8 38.5884 5.47932 6
 22 -2 -8 32.352 5.03377 2
 22 2 -8 35.4858 5.33992 2
 22 2 -8 41.8367 5.64506 2
 -22 2 8 36.5574 6.11776 2
 20 -2 -8 -2.9096 2.68158 2
 20 -2 -8 2.0543 3.4083 6
 -20 2 8 -4.1736 3.32132 2
 20 2 -8 -0.3434 2.85928 2
 20 2 -8 5.61921 2.93821 2
 -18 -2 8 2.30934 2.77622 2
 18 -2 -8 0.3738 3.08967 6
 18 -2 -8 1.78794 2.4598 2
 -18 2 8 0.06677 2.82858 2
 18 2 -8 1.19631 2.65255 2
 18 2 -8 2.51012 2.60456 2
 16 -2 -8 18.1264 2.82396 2
 16 -2 -8 29.5937 3.78052 6
 -16 -2 8 23.7738 3.95724 2
 -16 2 8 24.2026 4.25209 2
 16 2 -8 24.6536 3.9834 2
 -14 -2 8 78.7587 4.62004 2
 14 -2 -8 70.0306 4.84157 2
 -14 2 8 78.2201 4.93571 6
 14 2 -8 75.6407 3.95028 6
 14 2 -8 79.8814 4.71426 2
 -14 2 8 67.287 5.07852 2
 12 -2 -8 427.888 15.7025 2
 -12 -2 8 440.365 15.535 2
 12 2 -8 439.849 15.5674 2
 -12 2 8 424.592 17.6931 6
 12 2 -8 452.81 17.1077 6
 -12 2 8 450.718 15.9354 2
 -10 -2 8 222.988 8.51021 2
 10 -2 -8 222.759 8.8008 2
 -10 2 8 221.924 8.87688 2
 10 2 -8 222.962 8.55966 2
 -10 2 8 238.159 9.9886 6
 -8 -2 8 209.193 7.65876 2
 -8 -2 8 198.078 8.56384 6
 8 -2 -8 205.51 8.07445 2
 -8 2 8 199.658 8.16486 2
 8 2 -8 206.718 7.64255 2
 8 2 -8 206.324 8.28912 3
 -6 -2 8 161.173 7.21405 6
 -6 -2 8 162.522 6.06067 2
 6 2 -8 156.723 7.19051 1
 6 2 -8 157.253 6.01456 2
 6 2 -8 157.667 6.84021 3
 -6 2 8 156.678 6.69743 2
 -4 -2 8 419.75 13.8226 2
 4 -2 -8 413.683 15.3462 1
 4 -2 -8 395.747 14.5041 2
 -4 -2 8 391.764 14.6647 4
 -4 -2 8 411.279 15.6423 1
 4 2 -8 393.171 15.5905 1
 4 2 -8 398.279 14.7199 3
 -4 2 8 408.463 14.5092 2
 4 2 -8 390.882 13.7787 2
 2 -2 -8 354.676 12.846 2
 -2 -2 8 342.731 12.9247 4
 -2 -2 8 336.224 11.9166 2
 -2 -2 8 371.132 13.813 1
 -2 2 8 335.152 12.7175 2
 2 2 -8 342.014 12.8012 3
 0 -2 8 -0.4259 2.45285 4
 0 -2 -8 2.76967 2.28385 2
 0 -2 8 1.31772 1.39168 2
 0 -2 8 -0.7749 2.66966 1
 0 2 8 0.04909 2.31712 2
 0 2 -8 -1.3559 2.24583 4
 0 2 -8 2.01975 1.40788 2
 2 -2 8 58.2772 3.206 2
 2 -2 8 57.2018 5.16783 5
 -2 -2 -8 57.794 4.70325 2
 2 -2 8 47.2422 4.06201 3
 2 2 8 59.8124 4.3411 2
 -2 2 -8 56.1986 4.55782 4
 2 2 8 66.9639 3.78586 1
 -2 2 -8 54.6522 3.23602 2
 4 -2 8 -1.8303 1.74551 2
 4 -2 8 0.03861 2.89121 5
 -4 -2 -8 0.38778 1.36638 3
 -4 -2 -8 1.29602 2.62644 2
 4 -2 8 -3.1746 2.07253 3
 4 2 8 -1.7529 2.33532 2
 -4 2 -8 -0.7756 1.87022 2
 -4 2 -8 2.0396 2.38129 4
 6 -2 8 7.28655 2.33823 3
 6 -2 8 7.78364 2.14979 2
 6 -2 8 8.71816 3.44124 5
 -6 -2 -8 9.19044 2.97167 2
 6 2 8 6.63389 2.85151 2
 -6 2 -8 6.09939 2.65664 4
 -6 2 -8 6.33482 2.31411 2
 8 -2 8 23.3496 4.00975 5
 8 -2 8 24.7661 3.0085 2
 8 -2 8 23.6777 2.80381 3
 -8 -2 -8 19.6704 3.63213 2
 8 2 8 21.7559 2.81299 5
 -8 2 -8 20.3253 3.11251 2
 -8 2 -8 18.6655 3.32794 4
 8 2 8 18.1826 3.47835 2
 -10 -2 -8 -2.907 3.15116 2
 10 -2 8 3.65728 2.86569 2
 10 -2 8 0.08331 3.6802 5
 10 -2 8 -0.7308 2.38244 3
 10 -2 8 -0.2134 2.60242 2
 10 2 8 -1.6673 3.10108 2
 10 2 8 -1.0375 2.50097 5
 -10 2 -8 -1.2179 3.21476 4
 -10 2 -8 3.29097 3.13452 2
 12 -2 8 28.5142 4.07719 3
 -12 -2 -8 38.4089 6.39476 2
 12 -2 8 25.3886 3.86667 2
 12 -2 8 41.5139 5.40169 5
 -12 2 -8 28.6523 4.68926 4
 12 2 8 35.9546 4.39958 5
 14 -2 8 12.8782 3.62901 2
 -14 -2 -8 13.6008 4.36861 2
 14 -2 8 13.6072 3.71446 2
 14 -2 8 13.4537 4.96514 5
 -14 2 -8 5.90716 4.35513 4
 14 2 8 17.1901 3.94346 2
 -16 -2 -8 31.0273 5.40119 2
 16 -2 8 35.3967 4.61411 2
 16 -2 8 39.4323 4.85367 2
 16 -2 8 32.2266 4.60119 3
 -16 2 -8 30.1763 5.51461 4
 18 -2 8 54.444 5.29406 3
 -18 -2 -8 42.4301 5.57249 2
 18 -2 8 53.5424 7.67324 2
 18 -2 8 46.7542 8.09818 2
 -18 2 -8 47.5363 8.48666 4
 20 -2 8 18.8603 5.57066 2
 -20 -2 -8 4.51548 5.43932 2
 20 -2 8 17.6619 5.57426 2
 20 2 8 10.6164 4.93702 2
 20 2 8 22.4331 4.68119 2
 31 -3 -8 8.82473 9.08691 6
 31 -3 -8 1.03884 6.14095 2
 31 3 -8 15.3744 4.95 2
 31 3 -8 11.1825 7.93597 3
 29 -3 -8 10.7193 5.41398 2
 29 -3 -8 9.79729 7.61149 6
 29 3 -8 7.93897 4.40511 2
 29 3 -8 2.35787 6.19103 3
 27 -3 -8 16.1155 6.85347 6
 27 -3 -8 18.5608 4.57888 2
 27 3 -8 2.59363 5.23153 3
 -27 3 8 10.7929 5.26178 2
 27 3 -8 12.3398 4.27198 2
 25 -3 -8 1.93419 4.08094 2
 25 -3 -8 7.96041 5.58565 6
 25 3 -8 -1.4532 3.82743 2
 23 -3 -8 26.7406 5.52762 6
 23 -3 -8 19.016 3.99958 2
 23 3 -8 23.2233 4.78448 2
 -23 3 8 22.5285 5.17525 2
 21 -3 -8 72.609 6.33222 2
 21 -3 -8 76.4523 7.04013 6
 21 3 -8 86.2874 6.81362 2
 -21 3 8 78.7847 7.24115 2
 19 -3 -8 17.401 3.45671 2
 19 -3 -8 25.7072 4.65044 6
 19 3 -8 31.0759 3.93009 2
 19 3 -8 30.4007 4.82817 3
 -19 3 8 21.0387 3.70897 2
 19 3 -8 22.0419 3.79476 2
 17 -3 -8 289.166 12.9595 6
 17 -3 -8 293.967 11.6191 2
 17 3 -8 277.288 11.8203 3
 -17 3 8 295.187 11.7255 2
 17 3 -8 292.945 11.4872 2
 17 3 -8 279.685 11.6161 2
 15 -3 -8 384.338 14.3725 2
 15 3 -8 390.236 14.2709 2
 15 3 -8 381.865 15.7181 6
 -15 3 8 402.092 14.6191 2
 15 3 -8 386.956 14.4594 2
 15 3 -8 393.21 15.0386 3
 -15 3 8 378.658 16.4565 6
 13 -3 -8 308.8 11.9648 2
 13 3 -8 322.915 11.8329 2
 13 3 -8 317.831 12.5735 3
 -13 3 8 331.766 12.3025 2
 -13 3 8 311.775 13.8405 6
 13 3 -8 315.121 11.9503 2
 13 3 -8 326.614 13.1507 6
 11 -3 -8 20.2512 3.50223 2
 -11 3 8 23.405 4.02237 6
 11 3 -8 15.7574 2.39665 2
 11 3 -8 19.4249 3.58815 3
 -11 3 8 14.8595 2.62278 2
 11 3 -8 22.3287 3.45448 6
 11 3 -8 19.7352 3.29937 2
 -9 -3 8 48.4875 3.21467 2
 9 -3 -8 47.8531 3.92538 2
 9 3 -8 46.1633 4.72398 1
 -9 3 8 46.2107 5.10039 6
 -9 3 8 43.8816 4.13109 2
 9 3 -8 41.0655 3.34417 2
 9 3 -8 47.7458 4.32086 3
 7 -3 -8 149.605 6.75208 2
 -7 -3 8 142.377 7.23509 6
 -7 -3 8 148.194 5.67583 2
 7 3 -8 148.387 7.40751 1
 7 3 -8 144.11 6.88769 3
 7 3 -8 146.502 5.72859 2
 -7 3 8 142.784 6.68805 2
 5 -3 -8 -1.639 2.99693 1
 -5 -3 8 1.84573 2.64175 3
 -5 -3 8 6.59044 3.00918 6
 5 3 -8 9.43488 3.06012 1
 5 3 -8 6.10155 2.62815 3
 -5 3 8 5.14356 2.40546 2
 -3 -3 8 4.65312 3.30622 6
 -3 -3 8 6.29611 3.3081 1
 3 -3 -8 10.6536 2.55741 2
 3 -3 -8 5.40837 2.90763 1
 -3 -3 8 6.16738 2.66664 3
 -3 -3 8 6.28097 2.85418 4
 3 3 -8 8.57275 2.64297 3
 -3 3 8 9.01298 2.51636 2
 -1 -3 8 2.62398 2.82349 4
 -1 -3 8 0.84523 3.10081 1
 1 -3 -8 4.18443 2.46327 2
 -1 -3 8 -2.8895 3.02092 5
 -1 -3 8 -0.677 2.61155 3
 -1 3 8 4.8979 2.41391 2
 1 -3 8 27.8604 4.10048 3
 -1 -3 -8 46.7131 4.31641 2
 1 -3 8 35.1661 4.33445 1
 1 -3 8 30.6662 4.92018 5
 1 -3 8 40.5601 5.01566 4
 1 3 8 45.6184 4.38889 2
 1 3 8 40.8612 3.94669 1
 3 -3 8 -0.1393 2.64626 3
 3 -3 8 2.84067 3.40074 5
 3 -3 8 4.23098 1.4356 2
 -3 -3 -8 5.26514 2.85909 2
 -3 -3 -8 2.87064 2.16001 3
 3 -3 8 2.59902 1.48371 2
 3 3 8 5.66902 2.94736 1
 -3 3 -8 3.65909 2.48679 4
 3 3 8 3.19118 2.61064 2
 5 -3 8 60.7198 3.70705 2
 -5 -3 -8 63.0016 3.94064 3
 -5 -3 -8 61.5672 5.50152 2
 5 -3 8 59.9245 6.22902 5
 5 -3 8 63.0644 3.63212 2
 5 -3 8 67.4713 4.85113 3
 5 3 8 59.9311 5.34738 2
 -5 3 -8 68.1236 5.55706 4
 5 3 8 68.486 5.06939 1
 7 -3 8 117.124 6.25942 3
 7 -3 8 115.45 7.6121 5
 -7 -3 -8 123.703 7.33822 2
 7 -3 8 107.908 5.32264 2
 7 -3 8 107.575 5.42428 2
 -7 3 -8 112.45 7.11291 4
 7 3 8 105.918 7.04787 2
 9 -3 8 52.7454 5.0059 3
 9 -3 8 52.1991 6.762 5
 -9 -3 -8 53.1016 6.47134 2
 9 -3 8 54.4601 4.59345 2
 9 -3 8 53.9138 4.82889 2
 -9 3 -8 43.6894 5.91804 4
 9 3 8 40.5648 5.83951 2
 11 -3 8 14.0151 3.3858 3
 11 -3 8 21.5697 4.86204 5
 -11 -3 -8 22.4382 4.56268 2
 11 -3 8 19.1954 3.46218 2
 11 -3 8 21.2833 3.2358 2
 11 3 8 17.3674 4.13763 2
 13 -3 8 49.9166 5.48881 3
 -13 -3 -8 68.1856 8.14339 2
 13 -3 8 66.5053 6.36799 2
 13 -3 8 54.3037 5.84522 2
 13 -3 8 55.0994 7.5593 5
 -13 3 -8 45.5437 6.96387 4
 15 -3 8 19.9966 4.34552 2
 15 -3 8 16.0779 4.24182 2
 -15 -3 -8 13.3 4.95826 2
 15 -3 8 15.6415 3.97194 3
 -15 3 -8 13.0387 4.40842 4
 17 -3 8 21.0642 4.93732 2
 17 -3 8 24.8568 4.91961 2
 17 -3 8 17.1807 4.13025 3
 -17 -3 -8 13.8611 5.14891 2
 -17 3 -8 14.5637 4.75377 4
 19 -3 8 3.89458 5.28529 2
 19 -3 8 1.79742 4.4153 3
 -19 -3 -8 -3.6237 5.02265 2
 19 -3 8 3.52027 5.13233 2
 19 3 8 7.87561 4.02577 2
 -19 3 -8 -2.8444 4.48039 4
 30 -4 -8 8.80059 9.30772 6
 30 4 -8 6.77314 7.57207 3
 30 4 -8 15.004 5.88386 2
 28 -4 -8 4.58344 7.89999 6
 28 4 -8 11.0009 4.76572 2
 28 4 -8 1.69057 6.05348 3
 -28 4 8 1.92037 6.13581 2
 26 -4 -8 -2.1467 5.05091 2
 26 -4 -8 -5.1725 6.33809 6
 26 4 -8 -2.3018 5.01579 3
 26 4 -8 3.726 4.45144 2
 24 -4 -8 -0.0133 6.23075 6
 24 -4 -8 2.40914 4.57001 2
 -24 4 8 -2.0892 7.11272 5
 24 4 -8 -2.4274 4.52237 2
 -24 4 8 13.3414 5.70218 2
 24 4 -8 0.35219 4.71418 3
 22 -4 -8 13.5893 4.64745 2
 22 -4 -8 15.4703 6.20508 6
 22 4 -8 15.9137 4.51671 2
 22 4 -8 14.6453 4.60307 3
 -22 4 8 12.2206 4.73273 2
 20 -4 -8 40.281 7.37907 6
 20 4 -8 44.6784 6.57246 2
 -20 4 8 24.4661 4.84944 2
 -20 4 8 36.4147 6.06316 4
 20 4 -8 38.6703 5.97822 3
 18 -4 -8 4.07701 4.77731 6
 18 -4 -8 -1.7627 3.39505 2
 -18 4 8 2.82148 3.69365 2
 18 4 -8 3.03318 4.20795 6
 18 4 -8 2.76812 3.59725 3
 -18 4 8 2.72997 3.31651 4
 18 4 -8 5.07695 3.49165 2
 16 -4 -8 28.5539 4.5694 2
 16 4 -8 25.331 4.90385 6
 -16 4 8 27.7633 4.34291 4
 16 4 -8 29.0305 4.92501 3
 16 4 -8 31.2437 4.99738 2
 -16 4 8 31.3754 5.25394 2
 14 -4 -8 22.2215 3.95056 2
 -14 4 8 23.2435 3.53198 2
 14 4 -8 30.1574 4.2205 6
 14 4 -8 25.127 4.56447 2
 -14 4 8 21.1143 2.77321 4
 14 4 -8 26.1609 4.77233 3
 14 4 -8 34.738 5.74572 1
 -14 4 8 27.4391 5.0255 6
 14 4 -8 27.8218 4.48647 2
 12 -4 -8 17.2805 2.92779 2
 12 4 -8 28.4728 4.69107 1
 12 4 -8 28.7531 3.91498 6
 -12 4 8 20.0996 3.14832 2
 12 4 -8 17.5103 2.88063 2
 12 4 -8 21.8106 2.87406 2
 -12 4 8 19.819 4.57722 6
 12 4 -8 17.7834 3.47391 3
 10 -4 -8 -1.5728 2.39954 2
 -10 4 8 -0.9893 2.52488 2
 10 4 -8 -1.7067 2.88214 3
 10 4 -8 -0.0801 3.63859 1
 10 4 -8 -0.3997 3.37747 6
 10 4 -8 0.30881 2.13733 2
 8 -4 -8 125.438 6.27334 2
 8 4 -8 130.811 7.39089 1
 8 4 -8 124.247 5.36072 2
 8 4 -8 123.754 6.76394 3
 -8 4 8 124.055 6.562 2
 8 4 -8 120.897 5.39351 2
 -8 4 8 115.705 8.02491 6
 -6 -4 8 287.31 11.8999 3
 6 -4 -8 245.871 12.656 1
 6 -4 -8 288.375 11.3977 2
 -6 -4 8 296.056 12.5581 5
 -6 -4 8 292.751 12.9702 6
 -6 4 8 312.856 11.5719 2
 6 4 -8 308.945 12.6752 1
 6 4 -8 303.979 12.0211 3
 -4 -4 8 363.54 13.7422 4
 -4 -4 8 342.507 13.923 3
 -4 -4 8 332.244 15.2391 6
 4 -4 -8 379.104 13.4746 2
 -4 -4 8 329.126 14.901 1
 -4 -4 8 344.044 14.5771 5
 4 -4 -8 335.313 14.562 1
 -4 4 8 380.302 13.5027 2
 -2 -4 8 74.2332 6.33414 6
 2 -4 -8 64.9376 5.51016 1
 -2 -4 8 60.5568 5.98013 1
 -2 -4 8 78.3166 5.58786 3
 -2 -4 8 63.785 6.19698 5
 2 -4 -8 85.5289 5.6358 2
 -2 -4 8 74.6905 5.87754 4
 -2 4 8 84.0443 5.49923 2
 0 -4 8 7.57455 4.17773 6
 0 -4 8 1.0736 3.10975 4
 0 -4 -8 4.13075 3.10767 2
 0 -4 8 4.7686 3.08034 3
 0 -4 8 -2.548 3.7926 5
 0 4 8 3.78097 2.80958 2
 2 -4 8 -2.9341 3.02714 3
 2 -4 8 5.12015 3.33026 4
 2 -4 8 1.35944 3.55817 1
 2 -4 8 -2.7859 3.76659 5
 -2 -4 -8 -0.2216 3.25887 2
 2 -4 8 -1.1027 4.32412 6
 2 4 8 1.12404 3.39743 1
 -4 -4 -8 5.47641 3.01996 3
 4 -4 8 0.72338 4.50728 6
 4 -4 8 5.58855 3.44777 3
 -4 -4 -8 7.86715 3.4807 2
 4 -4 8 9.20645 4.04314 1
 4 -4 8 12.3333 4.19791 5
 4 4 8 10.6256 3.81762 1
 4 4 8 6.9377 3.44502 2
 6 -4 8 8.84791 4.62544 5
 6 -4 8 -4.042 3.37179 3
 -6 -4 -8 0.86103 2.96399 3
 -6 -4 -8 1.07808 3.57151 2
 6 -4 8 -0.8303 5.02852 6
 -6 4 -8 0.59205 3.24017 4
 6 4 8 6.62107 4.16319 1
 8 -4 8 6.7035 3.90589 3
 8 -4 8 7.29596 2.33182 2
 8 -4 8 15.7577 5.00773 5
 -8 -4 -8 11.9796 4.52397 2
 -8 4 -8 4.19217 3.94724 4
 8 4 8 18.0927 4.70449 1
 8 4 8 3.55303 3.74532 2
 10 -4 8 4.6997 3.94683 3
 10 -4 8 7.29462 4.99438 5
 -10 -4 -8 2.86366 4.22955 2
 10 4 8 7.16439 5.11422 1
 10 4 8 5.91002 3.79321 2
 -10 4 -8 -0.8955 3.95992 4
 12 -4 8 10.0833 3.70972 2
 12 -4 8 23.0662 5.51913 5
 -12 -4 -8 16.0147 4.89305 2
 -12 4 -8 16.3583 4.33202 4
 -14 -4 -8 9.55407 5.12858 2
 14 -4 8 2.3412 4.33567 3
 14 -4 8 7.27323 4.26268 2
 14 4 8 14.2471 4.64471 2
 -14 4 -8 11.4554 4.3432 4
 16 -4 8 3.16544 4.60506 2
 16 -4 8 1.02913 4.94026 3
 -16 -4 -8 8.11073 4.97879 2
 16 -4 8 5.16436 5.05477 2
 -16 4 -8 2.0918 4.64498 4
 18 -4 8 0.93463 6.00058 2
 18 -4 8 2.05253 5.23193 2
 -18 -4 -8 -6.6641 4.80651 2
 18 -4 8 -3.401 5.37803 3
 -18 4 -8 0.00903 5.08114 4
 18 4 8 2.53745 4.50137 2
 27 -5 -8 -4.5084 9.6508 6
 27 -5 -8 -1.6628 6.70056 2
 27 5 -8 -5.6945 5.68511 2
 27 5 -8 5.55101 6.48875 3
 -27 5 8 -6.9545 7.24219 4
 25 -5 -8 65.1656 11.6861 6
 25 5 -8 65.4012 8.82846 3
 25 5 -8 48.0174 6.51281 2
 -25 5 8 59.4488 9.53259 4
 23 -5 -8 121.36 9.08557 2
 23 -5 -8 121.273 11.6633 6
 -23 5 8 120.75 9.87893 4
 23 5 -8 102.019 11.1243 2
 23 5 -8 117.233 9.24736 3
 -21 5 8 56.3603 8.19287 5
 -21 5 8 50.9508 7.35763 4
 21 5 -8 43.47 6.0554 3
 -21 5 8 43.3884 6.05644 2
 21 5 -8 48.0087 7.96688 6
 21 5 -8 38.4833 5.84399 2
 19 5 -8 138.984 9.5822 2
 19 5 -8 152.498 9.87401 1
 -19 5 8 181.404 11.8705 5
 19 5 -8 135.386 8.9895 3
 19 5 -8 158.775 9.90511 6
 -19 5 8 146.318 8.32254 4
 -19 5 8 130.713 9.35109 2
 -17 5 8 117.54 8.36888 2
 17 5 -8 135.894 8.99005 6
 17 5 -8 127.806 9.08213 1
 17 5 -8 147.318 8.38686 3
 -17 5 8 131.545 7.55697 4
 17 5 -8 138.264 8.32358 2
 -17 5 8 133.807 11.0933 5
 15 5 -8 88.3222 6.83498 3
 -15 5 8 88.3586 7.13847 2
 15 5 -8 87.7115 7.6839 1
 15 5 -8 74.6656 7.60589 6
 -15 5 8 86.9943 9.17197 5
 15 5 -8 78.4408 6.48571 2
 -15 5 8 92.8174 8.52425 6
 -13 5 8 133.123 9.60374 6
 13 5 -8 131.288 7.78004 3
 13 5 -8 143.76 7.27433 2
 13 5 -8 141.959 8.7081 6
 13 5 -8 150.901 9.10015 1
 -13 5 8 130.493 7.86619 2
 -11 -5 8 67.7332 6.32873 5
 11 5 -8 59.1243 4.89281 2
 11 5 -8 59.2751 6.53461 6
 -11 5 8 55.2928 5.7371 2
 11 5 -8 50.9762 6.81561 1
 11 5 -8 65.1708 6.06407 3
 9 -5 -8 6.76329 3.1698 2
 9 -5 -8 5.18086 4.63255 1
 -9 -5 8 5.08878 4.20711 5
 -9 5 8 3.08636 3.2144 2
 9 5 -8 6.5721 2.6207 2
 9 5 -8 9.88794 4.66037 1
 9 5 -8 6.38857 3.718 3
 -9 5 8 3.39449 5.62168 6
 9 5 -8 13.1661 4.69446 6
 -7 -5 8 17.3223 4.52348 5
 -7 -5 8 14.0402 4.207 3
 -7 5 8 17.6177 3.49226 2
 -7 5 8 16.0571 5.38828 6
 7 5 -8 15.0356 4.39375 1
 -5 -5 8 3.14054 4.77941 6
 -5 -5 8 2.1708 3.88069 3
 -5 -5 8 3.90455 4.31221 5
 -5 -5 8 3.77128 3.64481 4
 5 -5 -8 6.99224 3.31043 2
 5 -5 -8 0.01803 4.58699 1
 -5 5 8 5.8977 5.41846 6
 -5 5 8 6.87329 3.1073 2
 -3 -5 8 44.1864 6.50235 6
 -3 -5 8 35.3843 6.3702 1
 3 -5 -8 37.656 5.9978 1
 -3 -5 8 47.553 6.1506 4
 -3 -5 8 32.9206 5.80611 3
 -3 -5 8 48.3022 6.96524 5
 3 -5 -8 47.3194 5.3365 2
 -1 -5 8 4.03987 4.23125 5
 -1 -5 8 1.39771 3.78389 3
 1 -5 -8 5.27533 3.66646 2
 -1 -5 8 8.70318 3.87623 4
 -1 -5 8 5.47605 4.73576 6
 -1 -5 -8 77.0242 7.24543 2
 1 -5 8 91.2479 8.18727 6
 1 -5 8 86.9114 7.09818 4
 1 -5 8 77.603 7.85578 5
 1 -5 8 72.2162 6.60343 3
 -1 -5 -8 60.7285 6.30394 3
 1 5 8 67.5697 6.54696 2
 3 -5 8 13.7391 5.22847 5
 -3 -5 -8 20.1873 4.30397 2
 3 -5 8 8.50491 4.94834 1
 3 -5 8 18.7234 4.53054 4
 3 -5 8 13.5702 5.69479 6
 3 -5 8 8.73047 4.21954 3
 -3 -5 -8 5.79766 4.03838 3
 3 5 8 13.6505 4.72859 1
 3 5 8 14.8826 3.90589 2
 -5 -5 -8 40.157 5.99048 3
 -5 -5 -8 51.4829 7.45923 2
 5 -5 8 41.848 6.46598 3
 5 -5 8 55.9426 7.92099 6
 5 -5 8 43.0723 7.55808 5
 5 -5 8 46.7175 7.1031 1
 5 5 8 36.6521 6.42877 2
 5 5 8 35.3094 6.34678 1
 7 -5 8 49.7622 6.77037 3
 -7 -5 -8 51.4656 6.08982 3
 7 -5 8 57.0104 8.45731 5
 7 -5 8 41.6061 8.6822 6
 7 -5 8 57.2215 7.02423 1
 -7 -5 -8 56.4524 7.68863 2
 7 5 8 57.4521 7.10046 1
 7 5 8 50.1872 6.81051 2
 -9 -5 -8 40.7559 5.56078 2
 9 -5 8 53.285 8.33332 6
 9 -5 8 54.9303 8.25533 5
 9 -5 8 42.3142 7.11858 3
 -9 5 -8 44.928 7.31024 4
 9 5 8 48.81 7.35484 1
 9 5 8 36.1311 5.30678 2
 11 -5 8 27.5229 5.90582 5
 -11 -5 -8 25.6301 5.61707 2
 11 -5 8 27.2248 7.57708 6
 11 -5 8 23.3801 5.3222 3
 11 5 8 43.5213 7.92346 1
 -11 5 -8 24.4878 4.95505 4
 13 -5 8 14.0629 5.62854 3
 -13 -5 -8 28.616 5.89309 2
 13 -5 8 29.0761 7.76753 6
 13 5 8 32.3013 7.16074 1
 -13 5 -8 26.6307 5.53677 4
 -15 -5 -8 11.838 5.71575 2
 15 -5 8 6.17213 5.99981 3
 -15 5 -8 9.76495 5.03282 4
 15 5 8 10.4701 8.14357 1
 15 5 8 3.80441 4.62424 2
 24 6 -8 -0.5835 6.64462 1
 24 6 -8 7.68522 6.46847 3
 -24 6 8 10.3512 7.33303 4
 24 6 -8 9.73535 6.81333 2
 -22 6 8 26.3504 6.61325 4
 22 6 -8 34.4245 9.01199 6
 22 6 -8 22.4599 7.18496 2
 22 6 -8 31.2433 6.48894 1
 22 6 -8 23.0119 6.19956 3
 20 6 -8 11.6232 5.71641 1
 20 6 -8 6.42221 7.729 6
 20 6 -8 7.20417 5.07951 3
 20 6 -8 4.80454 5.93326 2
 18 6 -8 -3.0359 4.99424 2
 18 6 -8 1.78703 4.52548 3
 18 6 -8 10.998 5.50165 1
 -18 6 8 18.4829 7.26017 5
 18 6 -8 2.21246 6.81383 6
 -16 6 8 11.3923 6.84766 5
 16 6 -8 0.75799 6.54491 6
 16 6 -8 0.27377 4.30085 3
 16 6 -8 6.36308 5.22527 1
 -16 6 8 -9.1902 4.71091 2
 16 6 -8 0.57584 4.78037 2
 14 6 -8 6.75839 4.3311 2
 14 6 -8 12.9747 5.6323 1
 -14 6 8 10.0608 6.82101 6
 14 6 -8 14.4798 5.9661 6
 12 -6 -8 10.9107 5.00247 1
 -12 6 8 -6.9499 6.73044 6
 12 6 -8 5.66397 3.71912 2
 -12 6 8 -1.1343 4.39044 2
 12 6 -8 9.17226 5.07518 1
 -12 6 8 0.96627 6.60636 5
 12 6 -8 14.9498 5.87502 6
 10 -6 -8 -1.2956 4.0094 2
 -10 -6 8 2.63437 5.29979 5
 10 -6 -8 9.00151 4.74464 1
 10 6 -8 1.39973 3.35747 2
 -10 6 8 -3.4968 4.10127 2
 10 6 -8 13.3199 5.94754 6
 10 6 -8 0.54969 4.94368 1
 8 -6 -8 -1.1126 5.09855 1
 -8 -6 8 4.17764 4.52357 3
 -8 -6 8 7.15056 5.49402 5
 -8 6 8 -9.6578 6.89468 6
 8 6 -8 3.41324 4.61267 1
 -8 6 8 1.58262 3.97751 2
 -8 6 8 -1.4661 5.5333 5
 6 -6 -8 58.4062 7.63846 1
 -6 -6 8 49.1198 7.33964 4
 -6 -6 8 66.3919 8.4972 5
 -6 -6 8 46.5497 6.87316 3
 -6 6 8 57.0065 6.69066 2
 -6 6 8 55.6934 7.57237 5
 -6 6 8 49.6342 8.72985 6
 -4 -6 8 17.6614 4.78905 3
 -4 6 8 22.7884 7.46889 6
 2 -6 -8 108.679 8.01705 2
 -2 -6 8 95.8572 8.87641 1
 -2 -6 8 117.791 9.99346 6
 -2 -6 8 127.185 9.7982 5
 -2 -6 8 128.681 8.78544 4
 -2 6 8 98.3318 7.84834 2
 -2 6 8 112.99 8.38072 5
 0 -6 8 15.5362 5.11211 4
 0 -6 8 21.2786 5.16807 3
 0 -6 8 29.9954 6.0896 5
 0 -6 8 17.1081 5.69615 1
 0 -6 8 27.717 7.21354 6
 0 -6 -8 17.8437 4.97653 3
 0 6 8 21.8191 5.03616 2
 2 -6 8 15.8051 5.94785 1
 2 -6 8 12.8071 4.81734 3
 2 -6 8 29.4387 6.51167 5
 2 -6 8 22.8923 6.9941 6
 -2 -6 -8 5.0159 4.81277 3
 2 -6 8 16.7985 5.29035 4
 -2 -6 -8 15.3794 5.07559 2
 2 6 8 12.529 3.85539 5
 2 6 8 11.0163 4.67112 2
 4 -6 8 6.27489 5.35019 4
 -4 -6 -8 5.78131 5.19811 2
 -4 -6 -8 -4.0275 4.79074 3
 4 -6 8 4.16657 5.12065 3
 4 -6 8 0.97956 7.12637 6
 4 -6 8 -3.6402 5.30436 1
 4 -6 8 9.45233 5.92513 5
 4 6 8 2.6095 5.36565 1
 -6 -6 -8 5.2478 5.43347 2
 6 -6 8 -2.478 4.59037 3
 6 -6 8 14.4221 5.72534 1
 6 -6 8 15.1539 6.21829 5
 -6 -6 -8 0.53491 5.40102 3
 6 6 8 2.86434 5.78553 1
 8 -6 8 29.0754 6.39491 1
 -8 -6 -8 17.9476 5.76168 2
 -8 -6 -8 12.3067 5.45603 3
 8 -6 8 13.3028 5.34895 3
 8 -6 8 18.2815 6.49668 5
 8 6 8 13.3595 6.28004 1
 8 6 8 13.0986 5.15296 2
 -10 -6 -8 7.32774 6.14718 2
 10 -6 8 -1.0513 5.74918 3
 10 -6 8 11.0692 6.19771 1
 10 6 8 5.54452 6.80383 1
 -12 -6 -8 17.0117 6.21265 2
 12 -6 8 -0.4234 6.31959 3
 12 -6 8 18.4165 8.09449 6
 12 -6 8 14.2824 7.29122 1
 12 6 8 8.00657 7.93305 1
 19 7 -8 20.5487 7.70362 2
 19 7 -8 30.4689 6.7826 1
 17 -7 -8 42.3795 7.96333 1
 17 7 -8 29.9502 6.76318 1
 17 7 -8 26.543 9.4406 6
 15 -7 -8 34.6973 6.71118 1
 15 7 -8 13.5009 6.03579 2
 15 7 -8 19.7503 6.28594 1
 -15 7 8 19.3924 8.32957 5
 -15 7 8 36.8322 8.64764 6
 15 7 -8 23.1741 8.3889 6
 13 7 -8 28.8393 5.64561 1
 13 7 -8 39.3538 8.79306 6
 -13 7 8 20.9976 8.09001 6
 11 -7 -8 18.8406 5.92957 1
 11 7 -8 30.6936 8.65362 6
 11 7 -8 14.4518 5.74721 1
 -11 7 8 18.5486 7.79732 6
 9 -7 -8 2.89503 6.34666 1
 9 7 -8 20.4369 7.91029 6
 -9 7 8 3.30426 7.06507 5
 -9 7 8 5.47365 8.05479 6
 -7 -7 8 -5.0105 5.22956 4
 -7 -7 8 2.36655 5.29681 3
 7 -7 -8 5.2708 5.54002 2
 7 -7 -8 -7.4844 6.07879 1
 -7 7 8 1.12202 5.01377 2
 -7 7 8 19.9378 7.60391 6
 5 -7 -8 11.2931 5.69786 2
 5 -7 -8 -4.6412 6.34779 1
 -5 -7 8 -0.5471 5.36617 3
 -5 -7 8 1.20517 5.35482 4
 -5 7 8 23.1608 7.89558 6
 -3 -7 8 11.0477 6.21754 1
 -3 -7 8 2.34552 5.06072 3
 3 -7 -8 25.6411 6.51723 2
 -3 -7 8 8.68202 5.44316 4
 3 -7 -8 12.1504 5.37908 3
 -3 -7 8 2.68396 7.09816 5
 -3 7 8 3.57968 5.71219 5
 -3 7 8 11.5815 5.39303 2
 -3 7 8 24.9675 8.06913 6
 -1 -7 8 30.8757 7.41466 5
 -1 -7 8 25.9208 6.64037 1
 1 -7 -8 31.6572 6.5361 2
 -1 -7 8 15.7161 5.94285 4
 -1 -7 8 23.839 6.00828 3
 1 -7 -8 14.6677 5.78041 3
 -1 7 8 20.201 5.7591 5
 -1 -7 -8 57.6741 9.70446 2
 1 -7 8 47.3931 8.07675 3
 1 7 8 38.8545 7.11888 5
 3 -7 8 15.8442 6.43668 4
 -3 -7 -8 5.30997 6.1263 3
 3 -7 8 16.0386 6.81683 1
 3 -7 8 19.1498 6.01011 3
 -3 -7 -8 36.3495 7.37645 2
 3 -7 8 17.0966 8.91557 6
 5 -7 8 54.0998 8.8603 3
 5 -7 8 49.5616 7.89384 1
 -5 -7 -8 44.9908 7.47568 3
 -5 -7 -8 52.2027 8.6332 2
 7 -7 8 55.1029 8.86704 1
 7 -7 8 43.8354 7.61191 3
 -7 -7 -8 46.345 7.62044 3
 7 7 8 50.174 8.57664 1
 9 -7 8 25.1435 7.60436 1
 9 -7 8 19.118 7.5841 3
 9 7 8 29.4301 8.50266 1
 12 -8 -8 3.48428 7.3251 1
 12 8 -8 23.0174 10.1441 6
 -12 8 8 21.3096 8.46292 6
 10 -8 -8 8.03111 7.39782 1
 -10 8 8 3.48786 8.0413 6
 8 -8 -8 5.59362 8.0177 1
 -8 -8 8 21.0446 7.38763 4
 -8 -8 8 26.4307 6.41733 3
 6 -8 -8 76.1307 9.04202 3
 -6 -8 8 52.1091 8.31992 4
 -6 -8 8 62.3436 7.68357 3
 6 -8 -8 58.915 9.83871 1
 -6 8 8 68.4112 11.7326 6
 4 -8 -8 15.23 8.16443 2
 -4 -8 8 7.74749 7.40741 4
 -4 -8 8 7.33068 5.61074 3
 4 -8 -8 11.7644 6.32815 3
 -4 8 8 22.737 9.06866 6
 -4 8 8 12.9212 7.70701 5
 -2 -8 8 11.2885 7.78319 4
 2 -8 -8 24.786 8.64933 2
 2 -8 -8 9.49878 6.60774 3
 -2 -8 8 16.0452 6.0905 3
 -2 8 8 13.7177 7.44909 5
 -2 8 8 25.7098 9.12468 6
 0 -8 -8 3.4132 7.15587 3
 0 -8 8 18.1683 6.41456 3
 0 -8 8 9.00024 7.92397 4
 0 -8 8 -2.4155 6.57329 1
 0 -8 -8 26.8242 9.0522 2
 0 -8 -8 -2.3938 6.02558 4
 0 8 8 13.6821 9.05899 6
 0 8 8 11.3953 7.12884 5
 34 0 -9 -0.6724 5.72171 2
 32 0 -9 4.89037 4.48266 2
 -32 0 9 2.50242 7.60322 5
 32 0 -9 13.1705 5.01888 2
 30 0 -9 5.46788 4.24403 2
 30 0 -9 12.5687 4.47945 2
 28 0 -9 1.52836 4.02774 2
 26 0 -9 0.89364 3.55557 2
 26 0 -9 -5.373 3.4942 2
 -26 0 9 -4.4407 3.8644 2
 24 0 -9 -6.3887 3.19739 2
 -22 0 9 -2.3767 3.28131 2
 22 0 -9 -5.0571 2.81973 2
 -20 0 9 -0.4446 2.95783 2
 20 0 -9 -2.7749 2.15789 6
 20 0 -9 0.62749 2.45867 2
 18 0 -9 -2.7039 2.36403 2
 18 0 -9 -1.7856 1.83846 6
 -18 0 9 -5.1229 2.54758 2
 16 0 -9 -0.1894 1.57636 6
 -12 0 9 1.61577 1.9982 2
 12 0 -9 -0.9633 1.88402 2
 10 0 -9 -0.2931 1.79861 2
 -10 0 9 1.20103 1.83452 2
 -8 0 9 0.03867 1.69012 2
 8 0 -9 -1.9768 1.66348 2
 -6 0 9 -2.474 1.71608 4
 -6 0 9 -0.0649 1.62761 2
 6 0 -9 -0.6625 1.63925 2
 -4 0 9 0.11191 1.66521 2
 -4 0 9 -0.5722 1.75992 4
 4 0 -9 0.71998 1.6913 2
 2 0 -9 -1.3628 1.76337 2
 2 0 -9 1.09499 1.66702 4
 -2 0 9 1.19481 1.89355 2
 0 0 -9 3.2128 1.94176 2
 0 0 9 4.90792 2.034 2
 4 0 9 4.43816 2.17825 2
 -4 0 -9 8.38627 2.18299 2
 6 0 9 2.45782 2.25374 2
 -6 0 -9 2.70786 2.44345 2
 6 0 9 -1.5707 2.56565 5
 8 0 9 -3.6903 2.78374 5
 8 0 9 1.53875 2.50256 2
 -8 0 -9 -0.9607 2.49152 2
 10 0 9 -2.3686 2.76002 2
 -10 0 -9 -0.2576 3.10649 2
 -12 0 -9 -1.5187 3.48587 2
 12 0 9 -3.1174 3.43287 5
 12 0 9 0.844 3.22715 2
 14 0 9 -1.18 3.93246 5
 -14 0 -9 4.17182 3.81608 2
 14 0 9 2.29869 3.50736 2
 -16 0 -9 0.614 4.29611 2
 16 0 9 2.98324 3.87162 2
 16 0 9 2.2566 3.75899 2
 18 0 9 -0.3027 4.07337 2
 18 0 9 -0.2936 4.20733 2
 20 0 9 -2.1218 4.59157 2
 20 0 9 -0.5729 5.17793 2
 33 -1 -9 5.48195 5.27398 2
 33 -1 -9 12.6021 4.79075 2
 33 -1 -9 19.7416 8.09719 6
 33 1 -9 16.0059 4.88261 2
 -33 1 9 17.7771 8.30056 5
 31 -1 -9 32.4201 5.76921 2
 31 -1 -9 39.6656 7.4886 6
 31 1 -9 39.1703 5.71869 2
 31 1 -9 41.0994 7.3416 2
 29 -1 -9 16.9886 4.82239 2
 29 -1 -9 35.0923 6.24116 6
 -29 1 9 33.8012 5.57816 2
 29 1 -9 29.3073 4.82899 2
 29 1 -9 28.2399 4.82934 2
 27 -1 -9 10.2129 4.01901 2
 27 -1 -9 17.0343 4.81617 6
 -27 1 9 13.5215 4.60631 2
 27 1 -9 15.2256 4.28043 2
 27 1 -9 18.0527 4.38917 2
 25 -1 -9 52.5667 5.54761 6
 -25 -1 9 36.8899 5.92961 2
 25 -1 -9 39.1528 6.07995 2
 -25 1 9 46.8165 6.31968 2
 25 1 -9 49.1435 6.09682 2
 25 1 -9 40.1946 6.27634 2
 -23 -1 9 60.8338 6.25811 2
 23 -1 -9 69.2806 5.89744 2
 23 -1 -9 75.5435 5.64817 6
 -23 1 9 87.8627 6.76931 2
 23 1 -9 75.6879 6.2732 2
 23 1 -9 79.6793 6.60137 2
 21 -1 -9 125.654 6.72329 6
 -21 -1 9 132.781 7.10633 2
 21 -1 -9 120.712 6.79203 2
 -21 1 9 134.778 7.36435 2
 21 1 -9 136.96 7.02609 2
 -19 -1 9 127.695 6.81376 2
 19 -1 -9 126.812 6.25195 6
 19 -1 -9 120.904 6.36418 2
 19 1 -9 120.846 6.50612 2
 -19 1 9 120.772 6.71402 2
 17 -1 -9 28.5951 3.43947 6
 17 -1 -9 32.4981 3.97792 2
 -17 -1 9 26.9735 3.27756 2
 17 1 -9 27.5447 4.0955 2
 -17 1 9 26.871 4.14657 2
 15 -1 -9 35.4407 3.32985 2
 -15 -1 9 28.8245 3.3069 2
 -15 1 9 25.8019 3.25153 2
 15 1 -9 35.3922 3.22169 2
 13 -1 -9 7.12353 2.3909 2
 -13 -1 9 9.98962 2.28311 2
 13 1 -9 9.06875 2.28168 2
 -13 1 9 10.5517 2.19471 6
 -13 1 9 5.52458 2.44312 2
 -11 -1 9 -0.4029 1.8863 2
 11 -1 -9 -0.1787 2.01064 2
 11 1 -9 -1.9004 1.83255 2
 -11 1 9 -0.6863 1.84941 2
 -11 1 9 0.72183 2.01403 6
 -9 -1 9 133.846 5.60188 2
 9 -1 -9 130.64 5.75529 2
 9 1 -9 125.371 5.50174 2
 -9 1 9 131.651 5.88216 2
 7 -1 -9 67.5551 3.98212 2
 -7 -1 9 70.5292 3.57687 2
 7 1 -9 66.9156 3.63565 2
 -7 1 9 68.1868 3.94904 2
 -7 1 9 69.4922 3.26154 4
 5 -1 -9 211.396 8.21659 2
 -5 -1 9 212.586 8.30177 4
 -5 -1 9 210.698 7.78596 2
 5 1 -9 204.463 7.79006 2
 -5 1 9 211.921 8.21301 2
 5 1 -9 210.659 8.38611 1
 3 -1 -9 889.958 30.3309 4
 -3 -1 9 890.359 30.3122 2
 3 -1 -9 916.655 30.6744 2
 -3 -1 9 891.367 30.771 4
 -3 -1 9 915.126 33.08 1
 3 1 -9 897.82 31.2035 3
 3 1 -9 885.001 30.3085 2
 -3 1 9 896.589 30.5911 2
 1 -1 -9 798.422 25.9636 2
 -1 -1 9 740.359 25.4412 2
 -1 -1 9 730.316 25.9444 4
 -1 -1 9 769.354 27.7757 1
 1 -1 -9 740.528 25.576 4
 -1 1 9 733.851 25.7363 2
 1 1 -9 745.671 25.9122 4
 1 1 -9 736.906 25.4814 2
 1 1 -9 749.745 26.1215 3
 1 -1 9 2186.78 72.5595 2
 -1 -1 -9 2209.04 72.922 2
 -1 1 -9 2099.94 72.5756 2
 1 1 9 2190.46 72.8441 2
 -1 1 -9 2193.61 73.2456 4
 3 -1 9 446.685 15.6426 2
 -3 -1 -9 448.771 16.1051 2
 -3 1 -9 416.137 15.6429 2
 3 1 9 459.085 16.0403 2
 -3 1 -9 447.603 16.1865 4
 5 -1 9 138.425 6.11279 2
 5 -1 9 130.484 7.09168 5
 -5 -1 -9 136.535 6.59421 2
 -5 1 -9 132.464 6.77039 4
 5 1 9 133.223 6.51471 2
 -5 1 -9 124.993 6.07009 2
 7 -1 9 122.923 6.02985 2
 -7 -1 -9 124.46 6.67062 2
 7 -1 9 110.859 6.88639 5
 7 1 9 115.014 6.2329 5
 -7 1 -9 119.731 6.16861 2
 -7 1 -9 121.727 6.8029 4
 7 1 9 123.905 6.42216 2
 -9 -1 -9 28.6588 3.71328 2
 9 -1 9 28.3245 4.47446 5
 9 -1 9 32.9747 3.64079 2
 9 1 9 32.4626 3.80189 5
 9 1 9 32.0773 3.86728 2
 -9 1 -9 27.0099 3.99258 4
 -9 1 -9 25.9937 4.74149 2
 11 -1 9 9.76343 4.17425 5
 -11 -1 -9 15.3936 3.72975 2
 11 -1 9 16.5058 3.441 2
 -11 1 -9 20.9707 4.0889 4
 -11 1 -9 16.4217 3.68238 2
 11 1 9 18.3855 3.82548 2
 11 1 9 16.5119 3.63396 5
 13 -1 9 14.4365 3.96418 2
 13 -1 9 14.9967 4.73308 5
 -13 -1 -9 22.9523 4.58596 2
 13 -1 9 19.5929 3.93068 2
 13 1 9 18.9967 4.08087 5
 13 1 9 21.595 4.21048 2
 -13 1 -9 19.9539 4.36425 4
 -13 1 -9 21.6741 4.36391 2
 15 -1 9 34.2952 4.76013 2
 15 -1 9 29.8729 4.56303 2
 15 -1 9 27.3114 5.4418 5
 -15 -1 -9 25.5669 5.07033 2
 15 1 9 32.7517 4.61812 2
 17 -1 9 21.2843 4.92562 2
 -17 -1 -9 15.5815 4.86888 2
 17 -1 9 23.0773 5.05618 2
 17 1 9 23.8539 4.61963 2
 17 1 9 33.6982 5.10661 2
 19 -1 9 17.8662 5.48669 2
 -19 -1 -9 16.9399 5.95602 2
 -19 1 -9 22.6402 5.96942 4
 19 1 9 26.4858 5.01541 2
 19 1 9 28.4481 5.29952 2
 32 -2 -9 17.3897 5.3969 2
 32 -2 -9 7.81886 8.50531 6
 32 2 -9 12.5546 5.15109 2
 30 -2 -9 11.5435 4.49554 2
 30 -2 -9 3.86012 4.49208 2
 30 -2 -9 7.28808 6.63534 6
 30 2 -9 4.32528 4.36427 2
 28 -2 -9 20.0205 5.88383 6
 28 -2 -9 17.2162 4.2528 2
 28 2 -9 21.6879 4.82279 2
 26 -2 -9 -0.9743 3.36973 2
 26 -2 -9 -1.2204 4.90046 6
 26 2 -9 -2.5866 3.72926 2
 -26 2 9 -6.0883 4.34065 2
 24 -2 -9 2.52422 4.29536 6
 24 2 -9 -7.1401 3.40297 2
 24 2 -9 -2.7296 3.40518 2
 -24 2 9 -0.5647 4.03815 2
 22 -2 -9 9.06626 3.92963 6
 22 -2 -9 14.1259 3.45069 2
 22 2 -9 14.5547 3.62122 2
 22 2 -9 9.07988 3.5121 2
 -22 2 9 9.69035 3.80397 2
 20 -2 -9 48.5096 5.03511 6
 -20 -2 9 46.2341 4.95596 2
 20 -2 -9 45.0294 4.73968 2
 20 2 -9 52.4649 5.13087 2
 -20 2 9 48.0768 5.47351 2
 20 2 -9 48.048 5.13522 2
 18 -2 -9 23.4216 4.19002 2
 18 -2 -9 29.3016 4.34655 6
 -18 -2 9 25.9274 3.47049 2
 18 2 -9 25.2837 4.36428 2
 -18 2 9 30.9286 4.88879 2
 -16 -2 9 303.836 11.6405 2
 16 -2 -9 307.039 11.8026 2
 16 2 -9 297.434 12.0657 6
 16 2 -9 306.965 11.6705 2
 -16 2 9 311.03 11.7854 2
 14 -2 -9 177.72 7.87269 2
 -14 -2 9 191.108 7.76056 2
 14 2 -9 190.884 7.62458 6
 14 2 -9 184.964 7.75087 2
 -14 2 9 186.717 8.59468 6
 -14 2 9 182.948 8.1661 2
 12 -2 -9 63.5124 4.52422 2
 -12 -2 9 72.1666 4.16753 2
 -12 2 9 72.6068 4.8962 6
 12 2 -9 68.3073 4.32013 2
 -12 2 9 61.0808 4.67802 2
 10 -2 -9 -1.9964 2.03472 2
 -10 -2 9 1.80257 1.82675 2
 -10 -2 9 -0.8353 1.89576 6
 10 2 -9 0.64831 1.91429 2
 -10 2 9 -2.4723 2.19596 2
 -8 -2 9 136.463 5.50781 2
 -8 -2 9 134.462 6.15793 6
 8 -2 -9 129.16 6.18446 2
 8 2 -9 135.275 6.54061 1
 8 2 -9 133.762 6.12338 3
 8 2 -9 134.53 5.46205 2
 -8 2 9 126.648 6.16711 2
 6 -2 -9 9.27249 2.30641 2
 -6 -2 9 13.3486 2.32995 2
 6 2 -9 12.6685 1.67017 2
 -6 2 9 6.5063 2.16304 2
 6 2 -9 12.6023 2.89046 1
 6 2 -9 10.1703 2.38616 3
 -4 -2 9 186.983 6.85608 2
 -4 -2 9 191.536 8.1385 1
 4 -2 -9 195.31 7.89864 2
 4 -2 -9 175.312 7.5986 1
 -4 -2 9 181.882 8.01366 4
 4 2 -9 187.303 7.73846 3
 -4 2 9 188.462 7.86719 2
 4 2 -9 178.704 6.88076 2
 -2 -2 9 25.752 3.17615 4
 -2 -2 9 25.696 2.32727 2
 -2 -2 9 30.1785 3.7298 1
 2 -2 -9 31.0499 3.89031 2
 2 2 -9 23.7777 3.05886 3
 -2 2 9 30.7506 3.72133 2
 0 -2 -9 35.3277 4.05521 2
 0 -2 9 34.2597 3.88823 1
 0 -2 9 36.4296 2.72501 2
 0 -2 9 37.0607 4.34838 4
 0 2 9 37.7002 4.14629 2
 0 2 -9 38.8756 2.73495 2
 0 2 -9 34.5357 3.95526 4
 -2 -2 -9 68.1501 4.95566 2
 2 -2 9 68.0887 5.29368 5
 2 -2 9 66.0182 4.27063 3
 2 -2 9 63.3315 3.66871 2
 2 2 9 73.1344 4.93378 2
 -2 2 -9 58.9109 3.64973 2
 2 2 9 63.1762 3.98316 1
 -2 2 -9 70.1385 4.82343 4
 4 -2 9 17.7914 3.54455 5
 -4 -2 -9 16.8445 3.15646 2
 4 -2 9 13.7773 2.22513 2
 4 -2 9 13.1371 2.53255 3
 -4 2 -9 14.5334 2.31855 2
 4 2 9 17.1333 3.07557 2
 -4 2 -9 11.9839 2.77428 4
 6 -2 9 40.2594 4.6048 5
 -6 -2 -9 27.5478 4.74105 2
 6 -2 9 24.9952 3.44454 2
 6 -2 9 34.7631 3.63067 3
 -6 2 -9 25.5825 4.58233 4
 -6 2 -9 32.0109 3.26437 2
 6 2 9 31.0765 3.80955 2
 8 -2 9 45.5518 3.86216 3
 8 -2 9 43.8233 4.4497 2
 -8 -2 -9 34.3431 5.53811 2
 8 -2 9 33.584 5.87057 5
 8 2 9 35.7533 4.01862 5
 -8 2 -9 36.2545 4.6177 2
 -8 2 -9 32.8354 5.00306 4
 8 2 9 32.2965 5.13234 2
 10 -2 9 36.8295 5.16055 2
 10 -2 9 43.6136 4.05438 2
 -10 -2 -9 36.0828 5.65117 2
 10 -2 9 35.5689 4.05371 3
 10 -2 9 31.1742 6.22991 5
 10 2 9 39.9892 5.66609 2
 -10 2 -9 31.4119 4.45338 4
 10 2 9 24.7126 4.41054 5
 -10 2 -9 40.4037 5.68926 2
 12 -2 9 71.4414 6.01953 2
 12 -2 9 47.3646 6.07897 2
 12 -2 9 56.4674 4.7217 3
 12 -2 9 55.4271 7.22634 5
 -12 -2 -9 68.9457 7.44699 2
 12 2 9 53.4647 5.22792 5
 -12 2 -9 43.4077 6.99473 4
 12 2 9 75.4382 6.35057 2
 14 -2 9 24.3971 4.45331 3
 14 -2 9 43.7814 6.53689 2
 14 -2 9 32.2041 5.50956 5
 -14 -2 -9 33.6551 5.06042 2
 14 -2 9 31.9603 4.53762 2
 -14 2 -9 27.7837 4.84835 4
 16 -2 9 0.55322 3.84851 2
 16 -2 9 2.94974 4.22135 2
 -16 -2 -9 -6.4521 4.06675 2
 -16 2 -9 -5.0333 4.29314 4
 16 2 9 2.64977 3.43124 2
 18 -2 9 0.94328 4.50224 2
 18 -2 9 -0.9009 4.83981 2
 -18 2 -9 1.09376 4.82151 4
 18 2 9 2.84348 3.62586 2
 31 -3 -9 13.2082 5.88057 2
 31 -3 -9 20.5586 8.61476 6
 31 -3 -9 19.6136 6.03601 2
 31 3 -9 16.1062 7.6256 3
 31 3 -9 25.1856 5.63004 2
 -31 3 9 7.58528 6.37988 2
 29 -3 -9 7.36707 7.10908 6
 29 -3 -9 13.0724 5.31958 2
 -29 3 9 7.89549 5.87122 2
 29 3 -9 16.2627 4.93879 2
 27 -3 -9 20.3533 6.39789 6
 27 -3 -9 26.0584 4.98589 2
 27 3 -9 20.9009 4.58034 2
 -27 3 9 19.2087 5.94241 2
 25 -3 -9 10.6577 4.12692 2
 25 -3 -9 10.8486 5.47333 6
 -25 3 9 6.77367 4.9664 2
 25 3 -9 6.4586 4.46502 2
 23 -3 -9 46.2831 6.84923 6
 23 -3 -9 38.8659 6.06515 2
 23 3 -9 45.8358 6.55663 2
 -23 3 9 41.7529 6.7169 2
 21 -3 -9 213.816 11.2063 6
 21 -3 -9 203.233 9.92933 2
 -21 3 9 222.703 10.3205 2
 21 3 -9 218.706 10.0324 2
 19 -3 -9 4.88131 3.99588 6
 -19 3 9 -2.7507 3.20686 2
 19 3 -9 1.1776 2.97105 2
 17 -3 -9 82.6214 5.43331 2
 17 3 -9 80.6004 5.76201 2
 17 3 -9 79.1884 5.514 2
 -17 3 9 83.875 5.78969 2
 17 3 -9 71.8597 5.39962 3
 17 3 -9 78.6677 4.98038 6
 -15 -3 9 110.395 5.56726 2
 15 -3 -9 99.5777 5.89377 2
 -15 3 9 99.1003 6.73299 6
 15 3 -9 87.7755 5.59364 6
 15 3 -9 102.259 5.94991 3
 -15 3 9 114.94 6.27331 2
 15 3 -9 109.882 5.92806 2
 15 3 -9 109.99 5.73996 2
 13 -3 -9 59.3164 4.51962 2
 -13 -3 9 66.5197 4.12106 2
 13 3 -9 60.4712 4.342 2
 13 3 -9 49.0226 4.25929 6
 13 3 -9 67.3147 4.85564 3
 13 3 -9 54.278 4.45293 2
 -13 3 9 50.6716 5.36387 6
 -13 3 9 58.4813 5.00087 2
 11 -3 -9 111.281 5.70579 2
 -11 -3 9 116.345 5.27534 2
 11 3 -9 112.113 6.70566 1
 11 3 -9 117.598 6.22453 3
 -11 3 9 119.586 6.99534 6
 -11 3 9 110.779 5.96641 2
 11 3 -9 110.326 5.36887 2
 9 -3 -9 21.589 3.83795 2
 -9 -3 9 21.4958 2.83029 2
 -9 -3 9 23.4792 3.57271 6
 9 3 -9 22.3622 4.28299 1
 9 3 -9 21.1579 3.88545 3
 9 3 -9 20.7384 2.97255 2
 -9 3 9 20.831 2.75415 2
 -7 -3 9 206.836 9.62012 6
 7 -3 -9 217.46 8.73116 2
 -7 -3 9 209.947 7.78287 2
 7 3 -9 211.214 7.79121 2
 7 3 -9 211.104 8.88566 3
 7 3 -9 218.191 9.52711 1
 -7 3 9 208.193 8.76811 2
 5 -3 -9 13.381 2.73345 2
 -5 -3 9 14.1744 3.34941 6
 -5 -3 9 10.1945 2.91662 4
 5 -3 -9 14.6215 3.20321 1
 5 3 -9 15.0661 3.29415 1
 5 3 -9 14.1806 2.80157 3
 -5 3 9 14.108 2.66122 2
 -3 -3 9 176.925 8.57986 1
 3 -3 -9 175.917 7.99851 1
 -3 -3 9 183.97 8.07095 3
 -3 -3 9 176.933 8.30303 4
 3 -3 -9 188.766 8.0998 2
 -3 -3 9 170.794 8.84254 6
 -3 3 9 196.23 8.1228 2
 3 3 -9 177.504 7.91041 3
 -1 -3 9 544.879 19.9046 4
 -1 -3 9 551.278 21.4068 1
 -1 -3 9 567.821 20.0262 3
 -1 -3 9 530.029 21.5638 5
 1 -3 -9 546.995 19.6501 2
 -1 3 9 544.924 19.6458 2
 1 -3 9 233.9 11.1278 5
 1 -3 9 254.771 10.0582 3
 -1 -3 -9 249.021 10.174 2
 1 -3 9 233.89 10.6965 1
 1 -3 9 233.547 10.3859 4
 1 3 9 253.402 10.2501 2
 1 3 9 241.351 10.1694 1
 3 -3 9 69.5022 6.3733 5
 3 -3 9 78.9362 4.98495 3
 -3 -3 -9 65.5862 4.17472 3
 -3 -3 -9 67.6727 5.7503 2
 3 -3 9 69.3949 3.54178 2
 3 3 9 71.4242 5.47235 2
 -3 3 -9 70.1686 5.34113 4
 -3 3 -9 65.6376 3.78359 2
 3 3 9 70.1139 4.92543 1
 5 -3 9 33.8294 3.30563 2
 5 -3 9 34.5158 4.45242 3
 5 -3 9 28.8033 3.24037 2
 -5 -3 -9 30.4815 3.22768 3
 5 -3 9 38.7808 4.70633 5
 -5 -3 -9 34.9161 4.03743 2
 5 3 9 33.5208 4.07043 2
 -5 3 -9 29.678 5.22603 4
 5 3 9 34.1149 4.57511 1
 7 -3 9 30.9872 3.69028 2
 7 -3 9 37.0346 6.27668 5
 7 -3 9 27.2655 3.83013 2
 -7 -3 -9 35.9489 6.28006 2
 7 -3 9 31.6936 4.54816 3
 7 3 9 30.6914 4.12319 2
 -7 3 -9 32.8674 5.52803 4
 9 -3 9 31.8084 4.34032 2
 -9 -3 -9 38.2695 4.82936 2
 9 -3 9 42.9967 5.11933 3
 9 -3 9 45.7612 6.90647 5
 9 -3 9 39.0873 4.61759 2
 -9 3 -9 38.1895 4.58965 4
 9 3 9 31.6385 5.7704 2
 9 3 9 32.8948 3.8016 5
 11 -3 9 18.3229 3.72639 3
 -11 -3 -9 24.4971 4.73407 2
 11 -3 9 18.0377 3.44601 2
 11 -3 9 34.7832 5.56701 2
 11 -3 9 24.5026 5.13311 5
 -11 3 -9 15.2896 4.32794 4
 11 3 9 25.1336 4.47301 2
 -13 -3 -9 62.5442 8.26051 2
 13 -3 9 53.8621 8.20893 5
 13 -3 9 52.2751 6.32761 2
 13 -3 9 60.0499 6.56138 2
 13 3 9 74.5754 7.23997 2
 -13 3 -9 64.1732 7.49345 4
 15 -3 9 -0.0372 3.75549 3
 -15 -3 -9 -4.6961 4.53321 2
 15 -3 9 5.83072 5.13047 5
 15 -3 9 6.93421 4.21726 2
 15 -3 9 4.06112 4.09867 2
 -15 3 -9 4.08398 4.25436 4
 15 3 9 12.5863 3.75525 2
 -17 -3 -9 -6.769 4.53029 2
 17 -3 9 3.85481 4.08916 3
 17 -3 9 3.71494 4.88637 2
 -17 3 -9 -0.0427 4.37308 4
 17 3 9 9.94527 4.19271 2
 30 -4 -9 3.34666 9.02442 6
 30 -4 -9 23.2194 6.81538 2
 30 4 -9 10.248 7.31793 3
 30 4 -9 22.8338 5.55428 2
 28 -4 -9 22.4311 6.28715 2
 28 -4 -9 18.1344 8.61992 6
 -28 4 9 27.454 7.57968 2
 28 4 -9 20.5601 6.17416 3
 28 4 -9 25.3728 5.24734 2
 26 -4 -9 -3.6017 7.01192 6
 26 -4 -9 -4.8951 4.91529 2
 26 4 -9 -3.3783 5.24193 3
 -26 4 9 10.8122 5.87998 2
 26 4 -9 6.73697 5.06033 2
 24 -4 -9 -0.6403 4.41038 2
 24 -4 -9 0.67505 6.43141 6
 24 4 -9 -2.4574 4.54941 3
 24 4 -9 -4.2627 4.21991 2
 -24 4 9 3.31258 5.22673 2
 22 -4 -9 3.47504 5.59307 6
 22 -4 -9 0.10055 4.13355 2
 22 4 -9 -1.493 4.153 2
 22 4 -9 -1.8616 4.16084 3
 -22 4 9 2.25253 4.60148 2
 20 -4 -9 114.606 7.85835 2
 20 4 -9 130.828 8.01287 3
 20 4 -9 132.356 8.08003 6
 -20 4 9 125.301 8.56647 2
 -20 4 9 147.876 7.93374 4
 20 4 -9 142.035 8.20245 2
 18 -4 -9 97.4875 6.78537 2
 18 4 -9 107.942 7.16588 3
 18 4 -9 113.953 7.03655 6
 18 4 -9 121.944 7.14892 2
 -18 4 9 114.071 6.40735 4
 -18 4 9 113.407 7.37754 2
 16 -4 -9 130.192 7.17659 2
 16 4 -9 141.39 7.75191 3
 -16 4 9 137.16 6.55366 4
 -16 4 9 151.697 7.62631 2
 16 4 -9 142.027 7.71881 6
 -16 4 9 145.076 9.06114 6
 16 4 -9 144.135 7.20173 2
 14 -4 -9 106.418 6.11763 2
 14 4 -9 107.612 6.70804 3
 14 4 -9 107.515 7.32824 1
 14 4 -9 106.191 6.52985 6
 14 4 -9 111.615 6.00744 2
 -14 4 9 115.252 7.97438 6
 12 -4 -9 52.5883 4.97105 2
 12 4 -9 58.4266 5.60852 1
 12 4 -9 53.3456 4.98584 3
 -12 4 9 53.3197 6.47424 6
 12 4 -9 62.2795 5.17852 6
 -12 4 9 52.0628 5.2904 2
 12 4 -9 57.3216 4.36032 2
 12 4 -9 58.8382 4.41074 2
 10 -4 -9 65.9128 5.1254 2
 -10 4 9 72.5226 6.50781 6
 -10 4 9 63.6997 4.97938 2
 10 4 -9 67.1517 6.02127 1
 10 4 -9 61.737 4.28656 2
 10 4 -9 73.007 4.31034 2
 10 4 -9 70.5923 5.5503 3
 8 -4 -9 24.2554 4.11489 2
 -8 -4 9 28.5687 4.69941 6
 8 4 -9 24.6566 4.41117 1
 8 4 -9 26.397 2.91734 2
 8 4 -9 24.2196 4.17139 3
 -8 4 9 27.9543 5.25714 6
 8 4 -9 20.7431 2.93869 2
 -8 4 9 26.2026 4.28625 2
 6 -4 -9 28.8421 4.31724 2
 -6 -4 9 19.9753 4.19984 6
 6 4 -9 28.5293 4.55957 3
 6 4 -9 30.7507 4.73068 1
 -4 -4 9 178.241 9.26573 5
 -4 -4 9 183.243 8.71332 4
 -4 -4 9 168.451 9.23113 1
 -4 -4 9 176.138 9.54371 6
 4 -4 -9 196.361 8.634 2
 -4 -4 9 181.916 8.58799 3
 4 -4 -9 172.904 8.80967 1
 -4 4 9 202.658 8.66898 2
 -2 -4 9 -6.2934 3.76845 1
 -2 -4 9 4.72947 3.12479 4
 -2 -4 9 0.31942 3.86191 6
 -2 -4 9 -2.5788 3.05349 3
 2 -4 -9 -0.5237 2.77543 2
 -2 4 9 -0.0364 2.8467 2
 0 -4 9 7.93479 4.31704 5
 0 -4 9 11.4179 4.12083 1
 0 -4 9 21.3901 5.07246 6
 0 -4 9 11.1482 3.57076 4
 0 -4 9 13.0301 3.49973 3
 0 -4 -9 16.139 3.52287 2
 0 4 9 8.90956 3.13237 2
 2 -4 9 2.59289 3.28745 3
 -2 -4 -9 0.36673 2.95011 3
 2 -4 9 6.26165 3.72362 4
 -2 -4 -9 2.17661 3.3619 2
 2 -4 9 -1.7458 3.84617 1
 2 -4 9 -2.8078 3.7806 5
 2 -4 9 3.14683 4.77632 6
 2 4 9 1.55544 3.58299 1
 2 4 9 2.62418 3.22015 2
 4 -4 9 16.0134 5.28681 6
 -4 -4 -9 21.5027 4.12388 2
 -4 -4 -9 16.0241 3.32895 3
 4 -4 9 19.4561 4.74585 5
 4 -4 9 13.9686 3.96264 3
 4 -4 9 20.8149 4.71252 1
 4 4 9 18.9516 4.26111 1
 -6 -4 -9 53.3061 6.88708 2
 -6 -4 -9 53.1797 4.69803 3
 6 -4 9 59.8165 6.96435 5
 6 -4 9 51.2381 5.9061 3
 6 4 9 58.9792 6.18869 1
 6 4 9 48.2671 6.34531 2
 -6 4 -9 43.4305 6.03337 4
 8 -4 9 49.29 5.81565 3
 -8 -4 -9 52.5034 7.31128 2
 8 -4 9 50.5647 4.20976 2
 8 -4 9 64.8572 7.52529 5
 8 4 9 60.8669 6.66603 1
 -8 4 -9 46.5702 6.54843 4
 10 -4 9 195.658 11.4206 5
 10 -4 9 193.063 8.62321 2
 10 -4 9 188.052 9.69901 3
 10 -4 9 184.847 8.34464 2
 -10 -4 -9 209.838 11.4085 2
 10 4 9 193.333 10.6561 1
 10 4 9 183.659 10.1436 2
 -10 4 -9 187.518 10.6259 4
 -12 -4 -9 215.022 11.959 2
 12 -4 9 213.023 12.414 5
 12 -4 9 186.396 10.38 3
 12 4 9 216.743 11.0039 2
 -12 4 -9 220.743 11.6535 4
 14 -4 9 96.8829 8.28313 3
 14 -4 9 100.598 7.86006 2
 -14 -4 -9 115.947 9.63289 2
 -14 4 -9 103.972 9.1237 4
 16 -4 9 50.9799 7.53402 3
 16 -4 9 67.5505 8.77794 2
 16 -4 9 71.856 8.54776 2
 -16 -4 -9 60.9956 9.21315 2
 16 4 9 64.6475 7.78604 2
 -16 4 -9 68.9473 8.23556 4
 27 -5 -9 4.89675 8.98885 6
 27 -5 -9 -7.6477 6.42799 2
 -27 5 9 -6.0976 7.26742 4
 27 5 -9 1.06654 6.11959 3
 27 5 -9 -0.9167 5.73985 2
 25 -5 -9 1.25817 7.94471 6
 25 5 -9 12.705 5.89949 3
 -25 5 9 1.14258 6.08699 4
 25 5 -9 -4.0189 6.06315 2
 -23 5 9 18.8978 5.44359 4
 23 5 -9 22.0752 6.94983 6
 23 5 -9 27.7748 5.68563 3
 23 5 -9 8.91923 5.55677 2
 21 -5 -9 8.67861 4.6214 2
 -21 5 9 -3.5298 6.95025 5
 21 5 -9 14.5444 6.01611 6
 21 5 -9 8.45002 4.96776 2
 21 5 -9 15.6392 4.95389 3
 -21 5 9 14.2164 4.61324 4
 19 -5 -9 19.9446 4.51898 2
 -19 5 9 22.6926 4.29396 4
 -19 5 9 15.4372 4.95396 2
 19 5 -9 18.2801 4.6755 2
 19 5 -9 28.0865 5.73418 6
 -19 5 9 22.3859 7.06805 5
 19 5 -9 37.103 6.81108 1
 19 5 -9 20.9933 4.73809 3
 17 5 -9 -2.1314 4.93534 6
 17 5 -9 -0.6744 3.80505 2
 17 5 -9 4.8458 4.95917 1
 -17 5 9 0.84147 5.77771 6
 -17 5 9 -1.6445 4.12674 2
 17 5 -9 5.83485 3.98681 3
 15 5 -9 5.96812 3.8299 3
 15 5 -9 10.2215 3.5239 2
 15 5 -9 10.1888 4.62439 6
 -15 5 9 5.36147 4.35162 2
 -15 5 9 13.6856 5.80046 6
 15 5 -9 12.5801 4.92303 1
 -13 -5 9 21.188 4.73726 5
 13 5 -9 18.1377 4.20227 3
 13 5 -9 22.0959 5.00569 6
 -13 5 9 17.7543 6.07245 6
 13 5 -9 19.4495 3.58667 2
 -13 5 9 18.0727 3.91509 2
 13 5 -9 22.9325 5.18081 1
 -11 -5 9 1.85041 4.13186 5
 11 -5 -9 3.35885 4.50879 1
 11 -5 -9 -1.4087 3.13783 2
 11 5 -9 4.98033 4.51891 1
 11 5 -9 6.52821 3.71975 3
 -11 5 9 -4.3986 5.47528 6
 11 5 -9 7.83777 4.52898 6
 -11 5 9 3.41217 3.46796 2
 11 5 -9 3.70944 2.87952 2
 9 -5 -9 5.19859 3.19172 2
 9 -5 -9 4.91097 4.34628 1
 -9 -5 9 8.25054 4.23735 5
 -9 5 9 1.56495 5.71915 6
 -9 5 9 5.15145 3.33264 2
 9 5 -9 3.8354 3.68559 3
 9 5 -9 2.45453 4.16234 1
 9 5 -9 2.14246 2.45106 2
 -7 -5 9 18.1579 4.55364 5
 -7 -5 9 18.0724 4.14796 3
 7 -5 -9 14.3743 4.82363 1
 -7 5 9 20.5419 3.79206 2
 -7 5 9 10.2274 5.37921 6
 -5 -5 9 76.8553 6.53269 3
 5 -5 -9 76.4938 7.1034 1
 -5 -5 9 97.4866 7.16023 4
 -5 -5 9 98.4501 7.96904 5
 5 -5 -9 99.1518 6.69449 2
 -5 -5 9 85.2285 7.4565 6
 -5 5 9 98.5751 6.73153 2
 -3 -5 9 46.4574 6.80787 5
 -3 -5 9 37.4139 5.74797 1
 3 -5 -9 38.4965 5.66102 1
 -3 -5 9 43.5421 5.93135 4
 -3 -5 9 34.8601 5.47861 3
 3 -5 -9 58.5103 6.07977 2
 -3 -5 9 51.3822 6.55024 6
 -3 5 9 51.5281 5.92884 2
 -1 -5 9 80.0899 8.14271 5
 1 -5 -9 85.6326 6.97288 2
 -1 -5 9 87.0704 6.94712 3
 -1 -5 9 88.2451 8.22177 6
 -1 -5 9 68.3706 7.21088 1
 -1 -5 9 98.8211 7.46781 4
 -1 5 9 77.9774 6.90979 2
 1 -5 9 17.3872 5.06401 5
 1 -5 9 20.5782 5.95052 6
 1 -5 9 13.2546 4.53679 3
 1 -5 9 14.0231 5.26391 1
 -1 -5 -9 12.6919 4.20801 3
 1 -5 9 13.4595 4.23363 4
 -1 -5 -9 18.4186 4.35555 2
 3 -5 9 2.45224 4.64031 1
 3 -5 9 -5.014 4.16602 3
 3 -5 9 3.26684 4.55743 4
 -3 -5 -9 -2.1715 3.85245 3
 3 -5 9 5.06219 5.95452 6
 3 -5 9 -0.7712 4.76417 5
 -3 -5 -9 9.02049 4.1414 2
 3 5 9 4.01742 4.6315 1
 -5 -5 -9 7.16601 4.29786 2
 5 -5 9 3.68861 4.83211 1
 5 -5 9 8.55556 5.42823 5
 -5 -5 -9 0.53814 4.05139 3
 5 -5 9 0.26258 4.40704 3
 5 -5 9 0.89661 6.247 6
 5 5 9 6.11439 5.0079 1
 5 5 9 -1.3279 3.9972 2
 7 -5 9 10.4686 5.17436 1
 7 -5 9 -4.122 4.52531 3
 7 -5 9 5.27374 6.28086 6
 -7 -5 -9 -2.6342 4.86789 2
 7 -5 9 9.83543 5.00375 5
 -7 -5 -9 3.5054 3.94016 3
 7 5 9 0.6148 3.83902 2
 7 5 9 -1.8497 5.32827 1
 9 -5 9 29.4272 6.40034 5
 9 -5 9 25.6494 7.34943 6
 9 -5 9 19.4044 5.20412 3
 9 -5 9 40.9436 7.4755 1
 -9 -5 -9 27.8892 5.80063 2
 9 5 9 27.3096 6.52996 1
 -9 5 -9 23.5032 4.68268 4
 -11 -5 -9 19.5926 5.43393 2
 11 -5 9 4.48668 4.95325 3
 11 -5 9 14.9742 5.85805 5
 -11 5 -9 14.273 4.57712 4
 11 5 9 19.6033 6.96543 1
 -13 -5 -9 15.0843 5.62423 2
 13 -5 9 8.16213 6.96001 6
 13 -5 9 -1.6003 5.55824 3
 -13 5 -9 7.96667 4.61098 4
 13 5 9 13.1359 7.50972 1
 15 -5 9 0.55093 5.90567 3
 15 5 9 4.52178 8.47662 1
 24 6 -9 7.11741 6.03368 3
 24 6 -9 7.07829 8.81445 6
 24 6 -9 -6.0099 7.30614 2
 -24 6 9 -3.8157 7.25286 2
 -24 6 9 6.96731 6.93376 4
 24 6 -9 -0.7768 6.15737 1
 -22 6 9 17.3606 6.09125 4
 22 6 -9 16.2023 8.24304 6
 22 6 -9 18.9305 5.91263 3
 22 6 -9 17.232 6.15127 1
 22 6 -9 14.5017 6.76613 2
 -20 6 9 11.586 7.23506 5
 -20 6 9 -3.0865 5.67571 2
 20 6 -9 6.95147 5.09189 3
 20 6 -9 7.17392 5.77166 2
 20 6 -9 2.92466 7.41375 6
 20 6 -9 8.34827 5.3791 1
 18 6 -9 38.039 6.50873 3
 18 6 -9 18.5696 7.28335 6
 18 6 -9 40.4177 7.49877 1
 18 6 -9 26.8647 5.35861 2
 16 6 -9 47.5297 7.22034 2
 16 6 -9 43.5098 6.73822 3
 16 6 -9 54.928 8.08348 6
 16 6 -9 39.9704 7.47782 1
 -16 6 9 42.5036 5.8104 2
 14 -6 -9 71.1743 7.54884 1
 14 6 -9 65.4148 6.88954 3
 14 6 -9 74.3871 8.26437 6
 -14 6 9 57.6661 7.84886 2
 -14 6 9 71.03 8.64389 6
 14 6 -9 67.1547 7.83945 1
 14 6 -9 72.6263 7.03544 2
 12 -6 -9 59.9715 7.07813 1
 -12 6 9 50.5932 7.4601 2
 12 6 -9 61.177 6.03368 2
 -12 6 9 47.1854 8.93088 6
 12 6 -9 61.9557 7.47709 1
 10 -6 -9 71.7872 7.3813 1
 10 -6 -9 82.6753 7.02949 2
 10 6 -9 74.6567 7.53376 1
 -10 6 9 68.5422 7.63805 2
 -10 6 9 66.6269 9.66715 6
 -10 6 9 66.4035 9.09942 5
 -8 -6 9 55.1235 6.86354 3
 -8 -6 9 69.954 8.54985 5
 8 -6 -9 60.7849 6.87316 2
 8 -6 -9 46.4769 7.54982 1
 -8 6 9 44.4739 8.66804 6
 8 6 -9 54.9206 6.95489 1
 -8 6 9 55.3305 6.82698 2
 -8 6 9 49.852 8.40319 5
 6 -6 -9 103.821 9.00547 1
 -6 -6 9 100.341 8.76347 4
 -6 -6 9 107.572 8.24154 3
 -6 -6 9 133.93 9.75252 5
 6 -6 -9 127.27 8.50264 2
 -6 6 9 124.619 8.53767 2
 -6 6 9 120.123 9.17004 5
 -6 6 9 116.081 10.0132 6
 -4 -6 9 352.153 16.0035 3
 -4 -6 9 396.925 17.4855 5
 -4 -6 9 371.206 17.8267 6
 4 -6 -9 356.631 14.934 2
 4 -6 -9 366.162 16.6356 1
 -4 -6 9 343.546 15.6186 4
 -4 -6 9 379.005 16.8535 1
 -4 6 9 352.948 17.797 6
 -4 6 9 391.991 15.2587 2
 -2 -6 9 55.3444 7.30465 3
 -2 -6 9 70.9235 9.22284 5
 2 -6 -9 70.6513 7.49671 2
 -2 -6 9 73.8422 7.91243 4
 -2 -6 9 58.6365 7.774 1
 -2 -6 9 48.0558 8.71235 6
 -2 6 9 62.3575 7.22394 5
 -2 6 9 66.3071 7.88959 2
 0 -6 -9 -1.8357 4.67684 3
 0 -6 9 5.28037 4.55441 3
 0 -6 9 15.4805 5.9096 5
 0 -6 -9 10.0219 4.8886 2
 0 -6 9 4.96781 6.88223 6
 0 -6 9 -2.795 5.1004 1
 0 -6 9 7.96606 4.65824 4
 0 6 9 5.32347 4.45301 5
 0 6 9 0.8049 4.66895 2
 2 -6 9 2.69115 5.26351 4
 -2 -6 -9 -3.5277 4.95731 3
 2 -6 9 5.90106 4.80493 3
 2 -6 9 5.97634 5.81494 1
 2 -6 9 9.65559 6.6414 6
 -2 -6 -9 10.0744 5.07941 2
 2 -6 9 11.1222 5.52514 5
 2 6 9 3.95653 4.04191 5
 4 -6 9 9.99577 5.39087 3
 4 -6 9 3.15904 5.33614 1
 4 -6 9 22.4613 7.95019 6
 4 -6 9 15.2998 5.76754 5
 -4 -6 -9 21.6294 5.56299 2
 -4 -6 -9 5.16182 5.35177 3
 4 6 9 7.99861 4.88371 2
 -6 -6 -9 14.0879 5.90775 2
 6 -6 9 15.5897 5.8042 1
 6 -6 9 25.5644 7.92632 6
 6 -6 9 8.97758 5.93614 3
 6 -6 9 3.11529 5.75868 5
 -6 -6 -9 5.96966 5.51417 3
 6 6 9 13.0605 6.07252 1
 6 6 9 1.92781 4.80962 2
 8 -6 9 11.7695 6.20475 5
 8 -6 9 4.77438 6.14878 3
 8 -6 9 7.40963 5.89345 1
 -8 -6 -9 0.58435 5.90263 2
 8 6 9 2.03748 6.61631 1
 10 -6 9 90.4476 11.1795 6
 10 -6 9 57.6875 9.39325 3
 10 -6 9 92.5931 10.0689 1
 -10 -6 -9 91.0847 10.2653 2
 10 6 9 78.1689 10.8752 1
 12 -6 9 82.99 11.1827 1
 12 6 9 77.34 11.5151 1
 21 7 -9 -15.292 10.1699 6
 -21 7 9 -0.6044 7.46918 2
 21 7 -9 15.3593 6.92177 1
 21 7 -9 3.66292 7.95299 2
 19 7 -9 -3.9276 8.87934 6
 19 7 -9 10.7457 6.43968 1
 17 -7 -9 0.27184 6.48362 1
 17 7 -9 8.57406 5.89017 1
 17 7 -9 11.2433 8.54472 6
 17 7 -9 1.52345 6.10534 2
 15 -7 -9 15.0639 6.32841 1
 -15 7 9 16.3865 8.05122 6
 15 7 -9 8.91481 8.38876 6
 15 7 -9 7.42574 5.87299 1
 13 -7 -9 6.58454 6.10532 1
 13 7 -9 21.2005 8.21559 6
 13 7 -9 2.70006 4.63109 1
 -13 7 9 -7.3369 7.30828 6
 11 -7 -9 0.55464 5.52221 2
 11 -7 -9 4.08507 6.05152 1
 11 7 -9 8.71657 5.54272 1
 -11 7 9 -2.0665 6.95401 6
 -11 7 9 1.45722 5.52727 2
 9 -7 -9 9.47717 6.49919 1
 9 -7 -9 8.85444 5.61329 2
 -9 7 9 17.2464 8.08091 6
 -9 7 9 6.62675 5.39914 2
 -9 7 9 9.43065 7.13028 5
 -7 -7 9 14.5454 7.83958 5
 7 -7 -9 11.8141 6.56403 1
 -7 -7 9 12.0303 5.59879 4
 -7 -7 9 12.9442 5.23248 3
 -7 7 9 19.7751 7.213 5
 -5 -7 9 53.3807 7.11998 3
 5 -7 -9 60.1036 8.68513 1
 -5 -7 9 60.4013 8.91792 4
 -5 7 9 83.1529 9.91482 6
 -5 7 9 58.1609 8.67997 5
 -3 -7 9 19.0142 5.97678 4
 -3 -7 9 24.3689 7.92473 5
 -3 -7 9 18.2933 5.54759 3
 3 -7 -9 30.9589 6.55699 2
 3 -7 -9 19.6986 5.87204 3
 -3 -7 9 30.9012 6.67547 1
 -3 7 9 18.9733 6.53321 5
 -3 7 9 28.5519 6.04521 2
 -1 -7 9 76.3583 8.93675 1
 1 -7 -9 66.0151 8.54448 3
 -1 -7 9 90.9156 9.27957 4
 -1 -7 9 98.1885 11.2984 5
 -1 -7 9 87.9363 8.66373 3
 -1 -7 9 101.653 10.5799 6
 -1 7 9 96.9207 9.80431 2
 -1 7 9 64.2958 10.1401 6
 1 -7 9 19.4606 8.94676 6
 1 -7 9 7.12136 6.01576 1
 -1 -7 -9 5.11806 6.23947 3
 1 -7 9 20.6763 6.0953 3
 1 -7 9 10.0358 6.16454 4
 -1 -7 -9 22.6942 6.93676 2
 1 7 9 16.5909 5.18126 5
 1 7 9 13.1502 6.49424 2
 -3 -7 -9 14.9626 7.37303 2
 3 -7 9 -1.0683 6.32664 4
 -3 -7 -9 -2.9902 6.45923 3
 3 -7 9 -2.2883 6.06836 1
 3 -7 9 11.7602 5.75805 3
 5 -7 9 -2.554 8.53837 6
 -5 -7 -9 13.9755 7.40417 2
 5 -7 9 18.5949 6.58228 3
 -5 -7 -9 9.46523 7.10469 3
 5 -7 9 17.3459 6.8317 1
 -7 -7 -9 20.0672 7.96409 2
 -7 -7 -9 2.49552 7.00534 3
 7 -7 9 4.95528 7.10828 3
 7 -7 9 4.08065 7.17242 1
 12 -8 -9 21.4755 8.28316 1
 -12 8 9 12.012 8.00962 6
 -10 -8 9 8.27795 7.74096 4
 10 -8 -9 -1.422 8.05396 1
 -10 8 9 22.9064 8.24243 6
 -8 -8 9 4.25803 6.83662 4
 8 -8 -9 3.24409 7.8423 1
 -8 8 9 2.66726 8.61545 5
 -6 -8 9 13.9737 7.67019 4
 -6 -8 9 7.46521 5.31342 3
 6 -8 -9 11.0283 6.3295 3
 6 -8 -9 11.7037 8.27 1
 6 -8 -9 10.2313 8.48735 2
 4 -8 -9 21.9837 8.51045 2
 4 -8 -9 14.3743 6.8682 3
 -4 -8 9 23.849 7.82642 4
 -4 8 9 30.51 9.2503 6
 -4 8 9 12.2269 7.83861 5
 -2 -8 9 0.85853 6.20548 3
 -2 -8 9 7.31754 7.73815 4
 2 -8 -9 -4.0977 6.73511 3
 2 -8 -9 8.45248 8.71425 2
 -2 8 9 -3.8115 7.42159 2
 -2 8 9 24.9852 9.12102 6
 -2 8 9 9.15851 7.3507 5
 34 0 -10 6.37341 5.68093 2
 32 0 -10 4.58168 4.47635 2
 32 0 -10 9.33532 4.55579 2
 30 0 -10 3.25439 4.20379 2
 -28 0 10 -3.5723 4.02888 2
 28 0 -10 -2.1601 3.78288 2
 26 0 -10 42.5336 6.19796 2
 -26 0 10 49.0868 6.39417 2
 24 0 -10 26.7371 4.016 2
 24 0 -10 21.9312 3.90487 6
 -24 0 10 28.9292 4.66882 2
 -22 0 10 336.027 12.9174 2
 22 0 -10 305.012 12.8659 6
 22 0 -10 308.595 12.5906 2
 -20 0 10 600.794 21.0896 2
 20 0 -10 561.583 20.8398 2
 20 0 -10 587.767 22.6206 6
 18 0 -10 522.793 19.4739 2
 -18 0 10 570.467 19.7125 2
 -16 0 10 748.849 25.7704 2
 16 0 -10 725.324 25.6193 2
 -14 0 10 429.697 15.1625 2
 14 0 -10 397.74 14.937 2
 -12 0 10 130.425 6.00487 2
 12 0 -10 126.307 5.86122 2
 -10 0 10 1321.72 43.7065 2
 10 0 -10 1269.55 43.6162 2
 -8 0 10 1.7158 1.87355 2
 8 0 -10 3.40827 1.84843 2
 -6 0 10 72.4663 4.09931 2
 6 0 -10 76.0457 4.29509 2
 -6 0 10 71.112 4.0456 4
 -4 0 10 130.517 5.70155 4
 4 0 -10 134.577 5.84193 2
 -4 0 10 128.242 5.6753 2
 2 0 -10 171.84 6.9219 2
 2 0 -10 158.541 6.85018 4
 -2 0 10 168.299 6.83645 2
 0 0 10 1124.91 37.8516 2
 0 0 -10 1132.2 37.947 2
 0 0 -10 1094.24 38.0524 4
 0 0 -10 1118.17 38.3671 3
 -2 0 -10 2759.31 92.4007 4
 2 0 10 2782.29 91.8348 2
 -2 0 -10 2713.3 91.881 2
 -4 0 -10 74.9052 5.17228 4
 -4 0 -10 79.5522 4.74138 2
 4 0 10 73.0208 4.65168 2
 6 0 10 80.7282 5.60036 5
 -6 0 -10 78.6051 5.33209 2
 6 0 10 81.3841 5.31303 2
 8 0 10 118.37 6.38564 2
 8 0 10 100.793 6.80558 5
 -8 0 -10 123.691 6.85285 2
 10 0 10 54.5501 5.31533 5
 10 0 10 44.052 5.39427 2
 -10 0 -10 38.4603 6.03923 2
 12 0 10 14.0511 4.22497 5
 12 0 10 19.8629 3.71869 2
 -12 0 -10 15.6891 4.06457 2
 14 0 10 49.3402 5.8062 5
 14 0 10 54.5061 6.82633 2
 -14 0 -10 45.0761 5.45958 2
 16 0 10 13.3239 4.21888 2
 16 0 10 12.5884 4.39052 2
 -16 0 -10 10.872 5.04637 2
 18 0 10 2.54066 4.72606 2
 18 0 10 -0.3702 4.48565 2
 33 -1 -10 5.34577 7.29055 6
 33 -1 -10 -4.4661 5.09031 2
 33 1 -10 11.261 4.94738 2
 31 -1 -10 1.79755 6.05242 6
 31 -1 -10 -3.2915 4.48072 2
 31 -1 -10 0.9472 4.37471 2
 31 1 -10 5.40993 4.66221 2
 -31 1 10 1.66912 4.91532 2
 29 -1 -10 -4.9489 3.98739 2
 29 -1 -10 -3.0108 4.07565 2
 29 -1 -10 7.32584 5.05452 6
 29 1 -10 -2.0224 3.98251 2
 29 1 -10 0.69772 4.25354 2
 -29 1 10 1.64764 4.50618 2
 27 -1 -10 5.91435 4.31035 6
 27 -1 -10 -5.177 3.4916 2
 27 1 -10 -0.4679 3.85207 2
 -27 1 10 -3.9504 4.23928 2
 27 1 -10 1.19512 3.95656 2
 25 -1 -10 -2.6513 3.18651 2
 -25 -1 10 -0.3656 3.88524 2
 25 1 -10 -0.2014 3.65747 2
 25 1 -10 0.44744 3.69786 2
 -25 1 10 2.89571 4.28382 2
 23 -1 -10 23.3565 4.43037 6
 23 -1 -10 23.7121 3.57499 2
 23 1 -10 27.8856 3.91463 2
 -23 1 10 25.8182 4.19693 2
 -21 -1 10 21.8137 3.4932 2
 21 -1 -10 25.7383 4.40545 2
 21 -1 -10 23.7609 3.84062 6
 -21 1 10 20.9898 3.83277 2
 21 1 -10 26.6838 4.71725 2
 19 -1 -10 3.14377 2.48534 2
 -19 -1 10 1.12506 2.85437 2
 19 -1 -10 -0.8635 2.52552 6
 19 1 -10 -0.1778 2.5671 2
 -19 1 10 1.70482 2.79151 2
 -17 -1 10 13.3643 2.9979 2
 17 -1 -10 15.9464 2.73008 2
 -17 1 10 13.6583 2.85511 2
 17 1 -10 10.8091 2.80424 2
 15 -1 -10 9.11379 2.4713 2
 -15 -1 10 6.46307 2.62148 2
 15 1 -10 10.7728 2.66472 2
 -15 1 10 10.07 2.68166 2
 -13 -1 10 26.7763 3.45855 2
 13 -1 -10 25.9992 2.92841 2
 -13 1 10 19.5062 2.87998 2
 13 1 -10 24.8366 3.614 2
 -13 1 10 22.2119 2.82007 6
 11 -1 -10 138.783 6.43329 2
 -11 -1 10 152.248 6.26419 2
 11 1 -10 151.293 6.29978 2
 -11 1 10 143.336 6.57453 2
 9 -1 -10 110.799 5.48518 2
 -9 -1 10 119.18 5.30563 2
 9 1 -10 114.657 5.16996 2
 -9 1 10 114.259 5.49575 2
 -7 -1 10 212.802 7.93256 2
 7 -1 -10 206.084 8.2497 2
 7 1 -10 208.094 8.41354 1
 -7 1 10 214.297 8.29212 2
 -7 1 10 200.62 7.56229 4
 7 1 -10 199.848 7.8189 2
 -5 -1 10 -0.6706 2.17882 4
 5 -1 -10 1.71675 1.94542 2
 -5 -1 10 3.021 1.66699 2
 -5 1 10 0.97858 2.0322 2
 5 1 -10 1.38697 1.71734 2
 5 1 -10 1.75178 1.95874 1
 -3 -1 10 57.5523 3.51545 2
 3 -1 -10 51.8153 3.32715 4
 -3 -1 10 47.7103 4.26243 4
 -3 -1 10 44.8743 3.36755 1
 3 -1 -10 54.8554 4.07609 2
 3 1 -10 55.2259 3.38555 3
 -3 1 10 60.3796 4.19355 2
 3 1 -10 50.438 3.37316 2
 1 -1 -10 157.639 6.80356 2
 -1 -1 10 151.081 6.92382 4
 1 -1 -10 149.956 6.38441 4
 -1 -1 10 153.772 6.29234 2
 -1 -1 10 163.025 6.58451 1
 -1 1 10 152.518 6.74983 2
 1 1 -10 150.773 6.19645 3
 1 1 -10 143.986 6.33615 2
 1 -1 10 43.3129 3.25714 2
 -1 -1 -10 39.8142 4.04528 2
 -1 1 -10 36.832 4.17176 4
 -1 1 -10 38.6454 3.39505 2
 1 1 10 42.3076 4.0275 2
 3 -1 10 4.95639 2.12295 2
 -3 -1 -10 3.79896 2.48969 2
 -3 1 -10 5.3112 2.01772 2
 3 1 10 2.41862 2.36393 2
 -3 1 -10 0.29118 2.30113 4
 5 -1 10 13.4662 3.31414 5
 -5 -1 -10 13.7887 2.87836 2
 5 -1 10 12.4498 2.55094 2
 5 1 10 9.75982 2.71985 2
 -5 1 -10 8.30273 2.82733 4
 -5 1 -10 11.128 2.53638 2
 7 -1 10 18.4996 2.92618 2
 7 -1 10 15.6479 3.75977 5
 -7 -1 -10 16.4391 3.28851 2
 -7 1 -10 12.2708 3.31199 4
 7 1 10 19.2359 3.20768 2
 -7 1 -10 19.6234 3.09562 2
 -9 -1 -10 -0.2417 3.01539 2
 9 -1 10 -0.0447 2.89517 2
 9 1 10 -1.2178 2.80557 2
 -9 1 -10 -0.2568 3.10512 4
 -9 1 -10 0.36405 3.07008 2
 9 1 10 -4.1308 3.06399 5
 -11 -1 -10 -0.6709 3.63274 2
 11 -1 10 2.22726 3.02351 2
 11 1 10 4.48805 3.14553 2
 -11 1 -10 -0.7355 3.34907 2
 -11 1 -10 -2.6882 3.40416 4
 13 -1 10 39.8194 4.82157 2
 13 -1 10 33.5879 5.34302 5
 13 -1 10 36.9971 6.07358 2
 -13 -1 -10 33.0531 4.8214 2
 13 1 10 41.6801 5.80158 2
 -13 1 -10 38.7567 6.76217 4
 -13 1 -10 36.3738 6.59055 2
 13 1 10 39.1461 4.96622 5
 -15 -1 -10 -1.2892 4.18649 2
 15 -1 10 -0.6138 3.78823 2
 15 -1 10 -4.2199 4.84123 5
 15 -1 10 2.11844 3.92331 2
 -15 1 -10 2.75648 4.34041 4
 15 1 10 6.14815 3.90546 2
 -15 1 -10 5.87127 5.08381 2
 17 -1 10 -0.3894 4.42864 2
 17 -1 10 0.41199 4.31119 2
 -17 -1 -10 -6.7959 4.1887 2
 -19 -1 -10 5.81982 5.94421 2
 19 -1 10 14.9352 5.97091 2
 19 -1 10 10.5582 5.37328 2
 -19 1 -10 11.8428 5.62417 4
 19 1 10 16.4937 5.29224 2
 32 -2 -10 3.53985 4.81659 2
 32 -2 -10 -3.5041 4.80648 2
 32 -2 -10 10.6265 7.94288 6
 -32 2 10 -8.798 5.40912 2
 32 2 -10 7.40104 4.82913 2
 30 -2 -10 7.84753 6.54451 6
 30 2 -10 11.0419 4.66282 2
 28 -2 -10 2.9125 3.99529 2
 28 -2 -10 8.59694 5.37846 6
 28 2 -10 3.67343 4.12794 2
 -28 2 10 -0.558 4.68559 2
 26 -2 -10 60.3121 6.22987 2
 26 -2 -10 58.5821 6.72159 6
 26 2 -10 53.6204 6.806 2
 24 -2 -10 23.2822 4.10196 2
 24 -2 -10 35.4376 4.9743 6
 -24 2 10 29.132 4.73377 2
 24 2 -10 26.6682 4.36561 2
 24 2 -10 25.5015 4.43748 2
 -22 -2 10 237.773 11.0472 2
 22 -2 -10 252.472 11.75 6
 22 -2 -10 248.828 11.0139 2
 -22 2 10 273.809 11.3068 2
 22 2 -10 253.806 11.1369 2
 22 2 -10 271.21 11.303 2
 20 -2 -10 275.215 12.2005 6
 20 -2 -10 259.978 11.1652 2
 -20 -2 10 267.25 11.2626 2
 -20 2 10 294.843 11.7346 2
 20 2 -10 279.613 11.2311 2
 18 -2 -10 389.366 14.6532 2
 -18 -2 10 393.741 14.5454 2
 -18 2 10 410.077 14.9397 2
 18 2 -10 380.411 15.0804 6
 18 2 -10 369.938 14.4731 2
 16 -2 -10 470.781 17.2199 2
 -16 -2 10 484.423 17.1823 2
 -16 2 10 480.04 17.2578 2
 16 2 -10 455.685 16.9734 2
 -16 2 10 468.587 19.129 6
 -14 -2 10 98.1513 5.1799 2
 14 -2 -10 91.551 5.21915 2
 -14 2 10 88.2802 5.83053 2
 14 2 -10 90.3135 5.17079 2
 -14 2 10 92.881 5.59875 6
 -12 -2 10 29.2154 3.31999 2
 12 -2 -10 24.5112 3.63567 2
 -12 2 10 24.4651 3.02996 2
 12 2 -10 24.5106 3.43429 2
 -12 2 10 26.3451 3.87786 6
 -10 -2 10 356.948 12.6058 2
 -10 -2 10 359.429 14.0334 6
 10 -2 -10 349.081 13.0144 2
 -10 2 10 343.835 13.1234 2
 10 2 -10 346.802 12.5639 2
 8 -2 -10 21.1883 2.76526 2
 -8 -2 10 24.2071 2.76208 2
 8 2 -10 19.1301 3.51432 3
 8 2 -10 19.9042 2.73925 2
 8 2 -10 20.9024 3.54175 1
 -8 2 10 18.5107 2.78177 2
 6 -2 -10 60.0652 3.91678 1
 6 -2 -10 67.6113 4.46821 2
 -6 -2 10 73.2949 3.58959 2
 -6 -2 10 60.6292 5.05357 4
 6 2 -10 66.4829 4.32229 3
 6 2 -10 65.2652 4.41599 1
 -6 2 10 60.039 4.67117 2
 6 2 -10 66.6625 3.55275 2
 -4 -2 10 184.547 7.06062 2
 -4 -2 10 198.355 8.28 1
 -4 -2 10 183.791 8.19595 4
 4 -2 -10 194.274 8.09132 2
 4 2 -10 192.215 7.90532 3
 -4 2 10 193.22 8.13066 2
 4 2 -10 182.31 7.11886 2
 -2 -2 10 71.7546 4.73439 1
 2 -2 -10 74.8694 4.93766 2
 -2 -2 10 71.42 5.09851 4
 -2 -2 10 70.5864 3.57198 2
 -2 2 10 76.7889 4.7779 2
 2 2 -10 73.1725 4.29168 3
 0 -2 10 219.503 9.28898 1
 0 -2 10 211.056 9.30574 4
 0 -2 10 207.589 8.04284 2
 0 -2 -10 222.753 9.10903 2
 0 2 -10 211.176 8.1285 2
 0 2 10 221.294 8.93212 2
 0 2 -10 223.061 9.09029 4
 2 -2 10 460.858 16.5387 2
 -2 -2 -10 496.237 17.5292 2
 -2 2 -10 472.026 17.4573 4
 2 2 10 498.452 17.4817 2
 -2 2 -10 453.902 16.6377 2
 2 2 10 478.976 18.1172 1
 4 -2 10 1.37671 3.19859 5
 -4 -2 -10 5.49012 2.7799 2
 4 -2 10 2.66794 2.31823 3
 4 -2 10 1.81153 2.12141 2
 4 2 10 0.49613 2.76844 2
 -4 2 -10 1.18359 2.66643 4
 -4 2 -10 2.39892 2.23524 2
 -6 -2 -10 28.2399 4.95565 2
 6 -2 10 37.6693 3.74671 3
 6 -2 10 43.2419 4.95371 5
 6 -2 10 29.8964 3.88882 2
 -6 2 -10 25.7157 4.36943 2
 6 2 10 34.0167 4.10246 2
 -6 2 -10 33.4044 5.03058 4
 8 -2 10 100.582 7.71517 5
 -8 -2 -10 101.375 7.24414 2
 8 -2 10 119.312 5.60021 3
 8 -2 10 107.318 5.86169 2
 8 2 10 99.0722 6.89549 2
 -8 2 -10 112.912 7.04001 4
 8 2 10 92.7169 5.99868 5
 -8 2 -10 98.8597 6.42683 2
 10 -2 10 19.0586 3.03521 3
 -10 -2 -10 16.0211 3.99221 2
 10 -2 10 11.3352 3.51119 2
 10 -2 10 17.6402 3.38327 2
 10 -2 10 14.7366 4.53031 5
 10 2 10 13.2448 3.41853 5
 -10 2 -10 17.5994 3.93102 2
 -10 2 -10 11.754 3.88767 4
 12 -2 10 39.1949 6.19649 2
 12 -2 10 30.7273 4.45943 3
 12 -2 10 33.358 5.66907 5
 -12 -2 -10 31.1407 4.82728 2
 12 -2 10 29.9526 4.31645 2
 12 2 10 33.0342 4.05155 5
 12 2 10 35.1715 5.78802 2
 -12 2 -10 28.0182 4.53914 4
 14 -2 10 9.19113 4.12941 2
 14 -2 10 4.6629 5.11718 5
 -14 -2 -10 8.76282 4.62106 2
 14 -2 10 10.2961 4.05755 2
 -14 2 -10 10.2471 4.24075 4
 -16 -2 -10 14.5586 5.2126 2
 16 -2 10 27.1329 6.38171 5
 16 -2 10 20.8558 4.92833 2
 16 -2 10 27.6332 5.0361 2
 -16 2 -10 24.9469 5.18494 4
 16 2 10 41.1565 6.92062 2
 18 -2 10 -0.2827 5.19014 2
 -18 -2 -10 -5.5802 5.06385 2
 18 -2 10 3.69167 5.18564 2
 18 2 10 7.09497 4.2806 2
 31 -3 -10 21.712 5.87593 2
 31 -3 -10 25.1226 8.3085 6
 -31 3 10 29.0974 6.63896 2
 31 3 -10 29.0474 5.85216 2
 29 -3 -10 68.0271 8.51855 2
 29 -3 -10 53.5255 9.52819 6
 29 3 -10 59.7776 7.55249 2
 27 -3 -10 46.3117 6.72867 2
 27 -3 -10 48.8843 7.02534 6
 27 3 -10 51.0739 6.22922 2
 25 -3 -10 84.5317 8.43233 6
 25 -3 -10 101.901 7.60323 2
 25 3 -10 77.411 7.8885 2
 -25 3 10 87.6271 8.16805 2
 23 -3 -10 65.8643 6.55678 2
 23 -3 -10 83.055 7.63242 6
 23 3 -10 61.8755 6.80988 2
 -23 3 10 79.6288 7.10735 2
 21 -3 -10 88.7878 6.92021 2
 21 -3 -10 107.661 7.69765 6
 21 3 -10 107.362 7.05178 2
 -21 3 10 107.994 7.33715 2
 19 -3 -10 -1.9987 2.94547 2
 19 3 -10 0.46011 3.15506 2
 19 3 -10 0.15203 3.11857 2
 -19 3 10 3.6557 3.39605 2
 19 3 -10 -0.7331 2.78281 6
 -17 -3 10 140.213 6.98603 2
 17 -3 -10 142.592 7.0464 2
 17 3 -10 143.003 7.44663 2
 17 3 -10 148.173 7.51023 3
 17 3 -10 128.658 6.68121 6
 -17 3 10 155.588 7.51535 2
 -17 3 10 137.77 7.89193 6
 17 3 -10 135.936 7.1046 2
 15 -3 -10 62.3423 4.87969 2
 -15 -3 10 70.9012 4.74201 2
 15 3 -10 61.1207 4.81251 2
 15 3 -10 55.1833 4.36112 6
 -15 3 10 58.5798 5.69066 6
 -15 3 10 64.8167 5.52741 2
 15 3 -10 73.7384 5.22372 3
 -13 -3 10 4.71302 2.33244 2
 13 -3 -10 4.96573 2.55808 2
 13 3 -10 1.47471 2.37087 2
 -13 3 10 5.25154 2.6996 2
 -13 3 10 0.70491 3.57374 6
 13 3 -10 12.4164 2.98698 3
 -11 -3 10 96.4046 4.75393 2
 11 -3 -10 85.6674 5.23215 2
 -11 3 10 94.3449 5.51818 2
 -11 3 10 84.2538 6.4925 6
 11 3 -10 91.118 5.60509 3
 11 3 -10 94.3075 4.83455 2
 11 3 -10 94.2424 6.04362 1
 -9 -3 10 56.236 4.4748 6
 -9 -3 10 57.3697 3.66192 2
 9 -3 -10 57.3562 4.65854 2
 9 3 -10 54.7002 4.93686 1
 9 3 -10 51.1457 4.38034 3
 9 3 -10 56.6347 3.54576 2
 -9 3 10 58.232 4.61312 2
 -7 -3 10 241.566 8.64627 2
 7 -3 -10 240.689 9.72858 2
 -7 -3 10 235.331 10.6129 6
 7 -3 -10 240.877 10.0809 1
 -7 3 10 228.576 9.5866 2
 7 3 -10 231.459 8.60301 2
 7 3 -10 247.686 10.383 1
 7 3 -10 231.199 9.84752 3
 -5 -3 10 223.348 7.75777 2
 5 -3 -10 217.333 9.0023 2
 -5 -3 10 201.965 9.33739 4
 -5 -3 10 212.444 10.1013 6
 5 -3 -10 194.966 9.11131 1
 5 3 -10 216.665 8.99492 3
 -5 3 10 218.937 9.01659 2
 -3 -3 10 108.262 6.79296 4
 -3 -3 10 101.614 6.65638 1
 3 -3 -10 130.406 6.43857 2
 3 3 -10 117.081 6.07759 3
 -3 3 10 129.436 6.55024 2
 -1 -3 10 146.153 8.00025 1
 -1 -3 10 160.572 7.38036 3
 1 -3 -10 161.879 7.64306 2
 -1 -3 10 147.205 7.61681 4
 -1 3 10 153.269 7.56181 2
 1 -3 10 0.90795 3.28383 1
 1 -3 10 0.03008 3.11568 4
 1 -3 10 2.29064 1.44658 2
 1 -3 10 -1.0279 3.31948 5
 -1 -3 -10 2.80341 2.84233 2
 1 -3 10 -1.4999 2.81167 3
 1 3 10 0.70138 2.59407 2
 1 3 10 -1.9272 2.76896 1
 3 -3 10 41.5025 5.61607 5
 3 -3 10 46.5416 4.66794 3
 -3 -3 -10 35.2155 5.10332 2
 3 -3 10 32.9734 3.24952 2
 -3 -3 -10 35.3388 3.47607 3
 -3 3 -10 34.8625 3.50604 2
 3 3 10 38.3534 5.08292 2
 -3 3 -10 38.9893 4.95956 4
 3 3 10 43.2883 4.44974 1
 5 -3 10 -1.0907 2.1936 2
 5 -3 10 -0.5085 3.01987 3
 -5 -3 -10 3.19995 2.02646 3
 5 -3 10 -0.0062 3.90204 5
 -5 -3 -10 1.78345 3.37368 2
 5 -3 10 1.22005 2.14318 2
 -5 3 -10 2.82256 3.06927 4
 5 3 10 3.33342 3.4879 1
 5 3 10 -4.4765 3.04754 2
 7 -3 10 13.2533 2.81107 2
 7 -3 10 18.1428 4.55567 5
 7 -3 10 19.2112 2.9307 2
 -7 -3 -10 14.8325 4.16652 2
 7 -3 10 18.7594 3.67184 3
 -7 3 -10 14.1236 3.77145 4
 7 3 10 10.8243 3.88236 2
 -9 -3 -10 19.693 4.51112 2
 9 -3 10 23.5811 4.88578 5
 9 -3 10 26.9729 3.93783 3
 9 -3 10 25.2235 3.28511 2
 9 -3 10 22.8293 3.45756 2
 9 3 10 19.6888 4.25723 2
 -9 3 -10 18.455 4.19925 4
 9 3 10 22.3824 3.0836 5
 11 -3 10 92.6922 6.46777 2
 11 -3 10 97.9459 8.49403 5
 -11 -3 -10 95.5209 8.43065 2
 11 -3 10 74.6502 6.32516 2
 11 3 10 97.3777 7.66512 2
 -11 3 -10 88.3232 7.75037 4
 13 -3 10 229.263 13.6034 5
 13 -3 10 230.296 10.7391 2
 13 -3 10 211.432 10.6522 2
 -13 -3 -10 234.168 12.5257 2
 13 -3 10 230.802 10.7394 3
 -13 3 -10 232.085 11.9282 4
 13 3 10 243.495 11.3994 2
 -15 -3 -10 -0.3024 4.97426 2
 15 -3 10 4.62209 5.54577 5
 15 -3 10 7.62097 4.23754 3
 15 -3 10 6.90554 4.73421 2
 -15 3 -10 9.09599 4.41005 4
 15 3 10 11.9549 3.85543 2
 -17 -3 -10 8.51717 5.26985 2
 17 -3 10 14.7914 5.45971 2
 17 -3 10 16.015 5.58192 2
 -17 3 -10 17.2563 4.874 4
 30 -4 -10 11.2704 6.48779 2
 30 -4 -10 -16.197 9.20237 6
 30 4 -10 7.43589 5.3338 2
 30 4 -10 -1.3161 6.95695 3
 28 -4 -10 -4.4215 8.10108 6
 28 -4 -10 -1.4212 5.68717 2
 28 4 -10 0.09482 5.70623 3
 28 4 -10 10.2135 5.15473 2
 26 -4 -10 33.7068 7.51205 6
 26 -4 -10 23.2197 5.31952 2
 26 4 -10 29.1023 5.89154 3
 26 4 -10 32.7489 5.35053 2
 -26 4 10 30.2056 5.75881 2
 -26 4 10 23.8493 7.69042 5
 24 -4 -10 10.2019 4.44339 2
 24 -4 -10 14.2622 6.40191 6
 24 4 -10 14.9571 4.88345 3
 24 4 -10 10.6495 4.91532 2
 22 -4 -10 5.57129 4.08738 2
 22 4 -10 -1.7177 3.98585 2
 22 4 -10 -0.8783 4.31708 3
 -22 4 10 5.77594 4.21122 2
 22 4 -10 5.03928 4.33738 6
 20 -4 -10 0.61014 3.69128 2
 20 4 -10 3.32623 3.95045 3
 -20 4 10 5.37291 3.68409 4
 20 4 -10 4.87089 3.84151 2
 20 4 -10 7.92912 4.17538 6
 18 -4 -10 3.82535 3.43318 2
 -18 4 10 11.2068 3.78159 2
 18 4 -10 7.75964 3.43506 2
 -18 4 10 6.42657 3.07537 4
 18 4 -10 6.77257 3.76631 3
 18 4 -10 5.6211 3.84999 6
 16 -4 -10 35.3632 4.94145 2
 -16 4 10 37.4731 6.29004 6
 16 4 -10 46.7376 5.11438 2
 16 4 -10 40.2674 5.38247 3
 -16 4 10 50.8876 5.77425 2
 16 4 -10 38.9382 4.93135 6
 14 -4 -10 16.8004 3.25378 2
 14 4 -10 25.4784 4.58145 6
 14 4 -10 21.841 3.25029 2
 -14 4 10 16.4318 4.88264 6
 -14 4 10 21.4374 3.58702 2
 14 4 -10 23.4167 3.80083 3
 14 4 -10 30.7802 4.87996 1
 12 -4 -10 40.0846 4.70427 2
 -12 4 10 39.9763 5.25058 2
 12 4 -10 44.0331 5.56356 1
 12 4 -10 35.8851 4.98576 3
 -12 4 10 37.9537 5.48251 6
 12 4 -10 32.7885 3.96417 2
 10 -4 -10 17.4428 3.08702 2
 10 4 -10 20.2933 4.27731 1
 10 4 -10 17.2135 3.47095 3
 -10 4 10 21.6505 4.87986 6
 -10 4 10 16.2593 3.04923 2
 10 4 -10 20.5336 2.64233 2
 8 -4 -10 -5.8098 3.49228 1
 -8 -4 10 -0.3228 3.60107 6
 8 -4 -10 4.00354 2.8819 2
 8 4 -10 -0.1894 1.84458 2
 -8 4 10 3.54239 2.84574 2
 8 4 -10 1.93076 3.53996 1
 8 4 -10 3.74935 2.9202 3
 6 -4 -10 32.8826 4.53952 2
 6 -4 -10 32.2873 4.45589 1
 -6 -4 10 33.9702 5.27509 6
 -6 -4 10 25.7184 4.00177 4
 -6 4 10 32.84 4.63974 2
 6 4 -10 38.0067 4.94873 1
 6 4 -10 28.2793 4.35258 3
 -4 -4 10 48.8521 6.00166 6
 4 -4 -10 53.403 5.21815 1
 -4 -4 10 59.5283 5.18235 3
 4 -4 -10 65.2221 5.86176 2
 -4 -4 10 61.6474 5.86636 4
 -4 -4 10 55.9362 6.10534 5
 -4 -4 10 57.1522 5.83199 1
 -4 4 10 64.1941 5.45164 2
 -2 -4 10 12.5769 3.62647 4
 -2 -4 10 16.1418 4.3797 6
 2 -4 -10 13.5948 3.41742 2
 -2 -4 10 11.0175 3.58418 3
 -2 -4 10 10.2662 4.01368 5
 -2 -4 10 8.84055 4.21542 1
 -2 4 10 14.9416 3.40872 2
 0 -4 10 35.324 6.1999 6
 0 -4 10 34.6169 6.46629 5
 0 -4 10 46.9542 5.53802 1
 0 -4 10 45.3563 5.07697 3
 0 -4 10 45.2006 5.59944 4
 0 -4 -10 38.6178 5.56003 2
 0 4 10 39.5978 5.52876 2
 2 -4 10 51.3364 5.73049 3
 2 -4 10 51.4522 7.21622 5
 2 -4 10 40.6727 5.64702 1
 2 -4 10 43.8544 6.73315 6
 2 -4 10 45.0127 6.6093 4
 -2 -4 -10 59.9474 6.41335 2
 -2 -4 -10 47.5669 4.98743 3
 2 4 10 46.5609 5.22843 1
 2 4 10 46.1463 5.59064 2
 4 -4 10 0.57119 4.46325 1
 4 -4 10 5.58694 4.60294 5
 4 -4 10 1.98698 3.75246 3
 -4 -4 -10 1.96093 3.10073 3
 -4 -4 -10 4.47006 3.86944 2
 4 4 10 3.98294 3.42786 2
 4 4 10 4.63277 4.23068 1
 6 -4 10 13.9342 4.84326 5
 6 -4 10 8.39234 4.13507 3
 -6 -4 -10 6.22115 2.97993 3
 -6 -4 -10 7.26872 4.1633 2
 6 4 10 11.0381 4.74119 1
 6 4 10 5.67689 3.63377 2
 -6 4 -10 1.51065 3.51455 4
 8 -4 10 15.431 4.53369 3
 8 -4 10 16.4854 2.94032 2
 -8 -4 -10 20.0653 4.83973 2
 8 4 10 25.6384 5.45991 1
 -8 4 -10 13.0958 4.31577 4
 8 4 10 15.4531 4.24416 2
 -10 -4 -10 5.16143 4.40193 2
 10 -4 10 12.6435 4.98562 5
 -10 4 -10 2.9253 4.13342 4
 10 4 10 8.48538 3.78054 2
 10 4 10 6.09387 5.55641 1
 -12 -4 -10 91.8782 9.44894 2
 12 -4 10 72.1108 9.80172 5
 12 4 10 72.5306 6.88016 2
 -12 4 -10 82.2253 8.54174 4
 12 4 10 70.2308 9.13182 1
 14 -4 10 12.9547 6.09965 5
 -14 -4 -10 14.3969 5.25911 2
 14 -4 10 9.37259 5.32432 3
 -14 4 -10 17.0786 4.8532 4
 14 4 10 8.65649 3.89281 2
 16 -4 10 -0.4142 5.74122 3
 16 -4 10 10.8825 5.42574 2
 -16 -4 -10 -1.0685 4.88035 2
 -16 4 -10 4.47195 4.67838 4
 -27 5 10 10.6559 6.90473 4
 27 5 -10 22.9194 6.47593 3
 -27 5 10 23.9451 6.96441 2
 27 5 -10 18.8239 6.95873 2
 25 5 -10 52.4365 9.03416 6
 25 5 -10 37.0675 6.54428 2
 -25 5 10 49.4546 8.74743 4
 25 5 -10 58.9627 8.37052 3
 -25 5 10 39.9954 6.87528 2
 23 5 -10 7.52033 4.81592 3
 -23 5 10 1.85806 4.98958 4
 23 5 -10 -0.3966 5.86294 6
 -23 5 10 -5.6538 5.40721 2
 23 5 -10 -8.4543 4.94812 2
 -21 5 10 7.07644 4.34226 4
 21 5 -10 6.59863 4.64234 3
 -21 5 10 -0.17 4.9065 2
 21 5 -10 9.91373 5.6338 6
 21 5 -10 5.04915 4.96749 2
 19 5 -10 -0.1373 3.75983 3
 19 5 -10 1.88834 5.09726 1
 19 5 -10 -1.183 5.1315 6
 -19 5 10 1.50606 3.73147 4
 19 5 -10 -3.8626 4.07801 2
 17 -5 -10 7.39067 3.93235 2
 17 5 -10 23.1399 5.04064 6
 17 5 -10 23.9799 5.63055 1
 17 5 -10 16.3294 4.21788 2
 -17 5 10 12.7398 6.49243 6
 17 5 -10 11.5613 4.19169 3
 -17 5 10 15.6371 4.76709 2
 15 5 -10 13.3047 4.88732 1
 15 5 -10 9.40583 4.82292 6
 15 5 -10 5.98383 3.67809 2
 -15 5 10 5.88146 5.83633 6
 15 5 -10 9.93632 4.19824 3
 13 -5 -10 4.73588 3.57658 2
 13 5 -10 14.7055 4.87443 6
 13 5 -10 9.01656 3.85259 3
 13 5 -10 8.75644 5.11326 1
 13 5 -10 6.84256 3.28859 2
 -13 5 10 1.3947 5.7652 6
 -13 5 10 5.07931 3.76325 2
 11 -5 -10 140.785 8.5859 1
 -11 -5 10 153.118 8.89413 5
 11 -5 -10 146.912 7.95212 2
 11 5 -10 143.633 6.77371 2
 -11 5 10 141.908 8.04729 2
 11 5 -10 141.55 9.08809 1
 -11 5 10 137.78 10.0413 6
 11 5 -10 135.223 8.23776 3
 9 -5 -10 208.675 9.66466 2
 -9 -5 10 208.128 10.609 5
 9 -5 -10 201.228 10.3755 1
 9 5 -10 200.789 9.96003 3
 -9 5 10 200.148 9.14095 2
 -9 5 10 189.042 11.3149 6
 9 5 -10 196.413 10.4373 1
 -7 -5 10 168.056 9.83572 6
 7 -5 -10 184.473 8.85325 2
 7 -5 -10 162.087 9.47511 1
 -7 -5 10 167.892 9.90819 5
 7 5 -10 165.93 9.2684 1
 -7 5 10 162.947 8.41835 2
 -5 -5 10 351.927 15.5447 5
 5 -5 -10 364.318 14.3028 2
 -5 -5 10 340.291 16.0891 6
 5 -5 -10 348.081 15.2366 1
 -5 -5 10 346.014 14.5475 3
 -5 -5 10 335.899 14.3342 4
 -5 5 10 352.305 14.0757 2
 -3 -5 10 39.5137 7.14552 5
 3 -5 -10 49.4672 6.20249 2
 -3 -5 10 49.3579 6.07074 3
 -3 -5 10 38.8112 6.42122 1
 -3 -5 10 44.28 7.11424 6
 -3 -5 10 57.0712 6.79543 4
 -3 5 10 55.222 6.64143 2
 -1 -5 10 3.73381 4.75762 5
 1 -5 -10 16.0353 4.19995 2
 -1 -5 10 5.78292 4.1643 4
 -1 -5 10 9.0666 4.0995 3
 -1 -5 10 5.84893 4.86222 1
 -1 -5 10 16.5093 5.85633 6
 -1 -5 -10 23.2767 4.6359 2
 -1 -5 -10 13.7277 4.19696 3
 1 -5 10 17.9843 6.31272 6
 1 -5 10 19.596 5.38642 5
 1 -5 10 10.3811 5.16138 1
 1 -5 10 13.1942 4.68324 3
 1 -5 10 17.3062 4.82018 4
 1 5 10 12.9264 4.40124 2
 3 -5 10 4.64597 5.21413 1
 3 -5 10 8.18295 6.56556 6
 -3 -5 -10 7.81003 4.10047 3
 -3 -5 -10 10.8218 4.33428 2
 3 -5 10 10.1264 4.83929 5
 3 -5 10 10.5615 4.57284 3
 3 5 10 14.8057 4.98464 1
 3 5 10 7.51898 3.97395 2
 -5 -5 -10 0.8735 4.37038 2
 5 -5 10 -4.0501 4.63821 3
 5 -5 10 1.07633 6.58067 6
 5 -5 10 -3.3206 4.75277 1
 5 -5 10 -2.6681 5.41931 5
 -5 -5 -10 -5.5468 4.02753 3
 5 5 10 -3.5493 5.15956 1
 7 -5 10 -2.4541 4.93079 5
 7 -5 10 -5.9 4.80856 3
 7 -5 10 8.27156 5.43506 1
 -7 -5 -10 2.6937 5.1671 2
 -7 -5 -10 2.27808 3.93042 3
 7 5 10 -5.311 5.41822 1
 -9 -5 -10 4.76048 4.84148 2
 9 -5 10 0.7313 5.19062 3
 9 -5 10 3.80535 6.30083 6
 9 -5 10 7.03487 5.50406 5
 9 -5 10 9.10163 6.27982 1
 9 5 10 1.43059 6.61008 1
 -9 5 -10 3.5589 4.5411 4
 11 -5 10 44.9287 8.8216 5
 -11 -5 -10 61.7138 9.51638 2
 -11 5 -10 50.3662 7.95952 4
 11 5 10 47.27 8.19822 1
 13 -5 10 55.7578 9.78817 6
 -13 -5 -10 70.2754 10.1741 2
 13 -5 10 45.2598 6.98556 3
 13 5 10 60.606 11.0687 1
 -13 5 -10 57.8396 8.6488 4
 13 5 10 50.4369 7.75897 2
 24 6 -10 12.9279 6.80101 1
 24 6 -10 7.91674 8.44923 6
 24 6 -10 3.33508 7.46614 2
 -24 6 10 10.5617 6.58149 4
 24 6 -10 12.2852 6.1163 3
 22 6 -10 -1.3191 5.90742 1
 22 6 -10 -7.4363 7.58505 6
 22 6 -10 5.1469 6.38443 2
 22 6 -10 0.00776 4.92006 3
 -20 6 10 -10.309 5.67951 2
 20 6 -10 -0.5399 6.87226 6
 20 6 -10 2.06949 4.7488 3
 -20 6 10 9.81873 7.44128 5
 20 6 -10 -0.8628 5.31117 2
 20 6 -10 5.96915 5.29515 1
 18 6 -10 7.74054 4.33921 3
 18 6 -10 14.7354 5.50767 1
 18 6 -10 7.61831 6.21094 6
 -18 6 10 -0.4375 7.01024 6
 18 6 -10 4.60778 5.0727 2
 -16 6 10 1.81035 6.42628 6
 16 6 -10 2.72923 4.1955 3
 16 6 -10 9.68974 6.26812 6
 16 6 -10 2.76668 4.6099 2
 -16 6 10 4.869 5.43967 2
 16 6 -10 -1.7453 5.18581 1
 14 -6 -10 9.59077 5.40109 1
 14 6 -10 7.61489 5.20118 1
 14 6 -10 2.72037 4.21299 3
 -14 6 10 3.72464 4.68471 2
 -14 6 10 8.7961 7.03327 6
 14 6 -10 7.56112 4.24803 2
 12 -6 -10 4.04264 4.27146 2
 12 -6 -10 9.40886 5.35597 1
 12 6 -10 -0.4889 4.95058 1
 -12 6 10 8.63706 4.59886 2
 -12 6 10 3.74197 7.03513 6
 12 6 -10 -0.5309 3.53159 2
 10 -6 -10 3.56168 4.31144 2
 10 -6 -10 3.84546 5.2651 1
 -10 6 10 0.22025 6.84337 6
 -10 6 10 3.40199 4.3221 2
 10 6 -10 0.64923 4.84465 1
 -8 -6 10 14.3823 5.92994 5
 8 -6 -10 1.22859 5.98161 1
 -8 6 10 16.7807 6.91379 6
 -4 -6 10 92.0503 9.16632 5
 -4 -6 10 71.6028 9.56769 6
 -2 -6 10 46.9983 8.48345 5
 -2 -6 10 35.9122 6.60921 3
 -2 -6 10 27.0122 5.83512 1
 2 -6 -10 28.5189 5.65789 2
 -2 -6 10 20.9994 7.42426 6
 -2 6 10 25.3725 5.25496 2
 0 -6 10 1.22498 5.44225 5
 0 -6 -10 3.63879 4.57965 2
 0 -6 10 -3.5945 5.307 1
 0 -6 10 5.55926 4.66527 3
 0 -6 10 4.11171 4.73141 4
 0 -6 -10 -4.9482 4.8365 3
 0 -6 10 4.1666 6.62404 6
 0 6 10 1.5063 4.75513 2
 -2 -6 -10 -2.946 4.87041 3
 2 -6 10 8.20929 5.02109 3
 2 -6 10 5.41514 5.06901 4
 2 -6 10 4.42317 7.32108 6
 2 -6 10 4.05646 5.3884 1
 2 -6 10 3.13786 5.56315 5
 -2 -6 -10 5.9868 5.22386 2
 2 6 10 1.18134 4.64521 2
 4 -6 10 6.30405 4.93493 3
 -4 -6 -10 5.7088 5.4173 2
 4 -6 10 4.34693 5.67002 5
 -4 -6 -10 2.89916 5.50664 3
 4 -6 10 23.449 8.39423 6
 4 -6 10 4.09905 5.66103 1
 6 -6 10 1.74587 5.63913 3
 6 -6 10 5.0354 8.25506 6
 6 -6 10 6.81057 5.94347 1
 -6 -6 -10 1.14425 5.4796 3
 -6 -6 -10 3.96073 5.79154 2
 6 -6 10 7.11407 6.02041 5
 6 6 10 5.31977 6.39561 1
 6 6 10 3.29766 4.54804 2
 8 -6 10 -5.8535 7.24482 6
 8 -6 10 17.5314 7.04797 1
 8 -6 10 -0.9166 6.05192 3
 8 -6 10 13.0778 6.36645 5
 -8 -6 -10 3.74874 6.03326 2
 8 6 10 -1.7506 6.90822 1
 10 -6 10 2.73725 7.05096 3
 10 -6 10 21.1962 7.59331 1
 -10 -6 -10 12.9197 6.0627 2
 10 6 10 1.21831 8.01973 1
 21 7 -10 4.31157 6.65834 1
 19 7 -10 0.50463 6.44132 1
 19 7 -10 -7.4827 8.77461 6
 17 -7 -10 10.7236 6.27084 1
 17 7 -10 3.83722 5.74189 1
 17 7 -10 1.19027 8.91319 6
 -17 7 10 6.0566 7.73427 6
 15 -7 -10 26.5027 6.894 1
 -15 7 10 -3.1556 7.61386 6
 15 7 -10 11.0488 6.04535 1
 15 7 -10 14.7898 8.53928 6
 13 7 -10 12.8702 5.3416 1
 -13 7 10 24.0683 6.24269 2
 -13 7 10 15.0137 7.67222 6
 11 -7 -10 54.7612 8.9529 1
 -11 -7 10 65.9645 10.697 5
 -11 7 10 50.9457 9.2939 6
 -11 7 10 68.1175 9.23571 2
 11 7 -10 55.1901 7.57623 1
 -9 -7 10 67.4552 9.20647 4
 9 -7 -10 69.4542 8.93164 1
 -9 7 10 97.806 10.8443 6
 -7 -7 10 85.202 11.2201 5
 7 -7 -10 59.9408 9.23671 1
 -7 -7 10 57.7394 8.6176 4
 -7 -7 10 62.3365 7.78466 3
 7 -7 -10 96.4059 9.91499 2
 -7 7 10 75.4747 10.0946 6
 -7 7 10 74.4709 9.79815 5
 -5 -7 10 25.0154 6.1779 4
 5 -7 -10 39.8096 7.68478 1
 -5 -7 10 31.6246 6.20138 3
 -5 -7 10 40.7558 8.50467 5
 -5 7 10 45.3729 8.45272 6
 -5 7 10 27.9631 6.35461 2
 -5 7 10 36.6785 7.52026 5
 3 -7 -10 14.3843 5.85013 3
 -3 -7 10 19.3637 6.63555 1
 -3 -7 10 11.61 5.83708 4
 -3 -7 10 6.2248 5.50043 3
 -3 -7 10 23.1881 8.16349 5
 -3 7 10 8.20108 7.80322 6
 -3 7 10 19.4464 6.53936 5
 -1 -7 10 9.03388 7.93073 6
 -1 -7 10 9.46358 6.24005 1
 1 -7 -10 5.95501 6.61633 2
 -1 -7 10 8.34921 5.68754 3
 -1 -7 10 3.74397 5.71072 4
 -1 -7 10 8.22205 6.79513 5
 1 -7 -10 3.343 5.59066 3
 -1 -7 -10 -0.5106 6.16786 3
 1 -7 10 -3.8193 5.41272 3
 1 -7 10 0.46934 7.12864 5
 -1 -7 -10 4.36937 6.74081 2
 1 -7 10 -1.1087 6.13942 4
 1 -7 10 -11.722 8.15449 6
 1 7 10 4.94876 5.17309 5
 1 7 10 -6.6494 6.2772 2
 3 -7 10 3.96915 6.11046 3
 -3 -7 -10 -9.3876 6.55434 3
 3 -7 10 -10.481 6.09156 1
 -3 -7 -10 15.059 7.62943 2
 3 -7 10 12.4428 6.72611 5
 5 -7 10 24.5692 7.64603 5
 5 -7 10 9.30154 6.91253 3
 -5 -7 -10 9.21607 7.83008 2
 5 -7 10 0.93456 7.00678 1
 -5 -7 -10 2.28491 7.3822 3
 12 -8 -10 28.5039 8.29862 1
 -12 8 10 25.087 9.12546 6
 -10 -8 10 6.23266 7.46861 4
 10 -8 -10 1.99993 7.85037 1
 -10 8 10 16.6066 8.71129 6
 8 -8 -10 4.56968 8.48503 1
 -8 -8 10 7.39904 7.40749 4
 -8 8 10 21.3721 9.39824 6
 6 -8 -10 10.3442 8.74875 2
 6 -8 -10 8.19754 6.79224 3
 -6 -8 10 -0.7498 7.12338 4
 -6 -8 10 9.78597 5.65006 3
 -6 8 10 1.47696 8.56031 5
 -6 8 10 27.3121 8.71011 6
 4 -8 -10 1.80634 6.86745 3
 -4 -8 10 6.41097 7.72874 4
 4 -8 -10 12.3057 8.75171 2
 -4 8 10 11.4375 7.5755 2
 -4 8 10 6.48483 8.07737 5
 -4 8 10 25.2975 9.45937 6
 34 0 -11 2.67551 6.67615 6
 34 0 -11 3.81111 4.59333 2
 32 0 -11 -7.5542 4.12561 2
 32 0 -11 -3.2694 5.30732 6
 30 0 -11 -4.5195 4.46091 6
 30 0 -11 -4.8783 3.92225 2
 28 0 -11 -6.7601 3.72372 2
 28 0 -11 -1.4935 3.76386 6
 -28 0 11 -0.3818 4.12054 2
 -26 0 11 -2.2114 4.01402 2
 26 0 -11 0.62661 3.15626 6
 24 0 -11 -4.1299 3.18494 2
 24 0 -11 -4.0904 2.70607 6
 -24 0 11 -4.7092 3.8068 2
 22 0 -11 8.73773 2.85858 2
 -22 0 11 9.22484 3.34602 2
 22 0 -11 4.69488 2.36431 6
 -20 0 11 2.35037 2.91087 2
 20 0 -11 4.37583 2.70659 2
 -18 0 11 -0.2749 2.60442 2
 18 0 -11 -2.2292 2.28599 2
 16 0 -11 -2.3728 2.3141 2
 -16 0 11 -3.8539 2.40469 2
 -14 0 11 -0.9938 2.36903 2
 14 0 -11 -4.167 2.16378 2
 -12 0 11 -3.9709 2.08362 2
 12 0 -11 -1.2961 2.08807 2
 -10 0 11 2.07306 2.01836 2
 10 0 -11 2.47058 1.92696 2
 -8 0 11 0.61945 2.00706 2
 8 0 -11 0.61656 1.91362 2
 -6 0 11 -0.5636 1.90619 2
 6 0 -11 0.18175 1.96629 2
 -6 0 11 -0.7827 1.94573 4
 -4 0 11 0.82988 1.946 2
 4 0 -11 0.16676 2.12141 2
 -4 0 11 -1.0596 2.07492 4
 -2 0 11 1.6892 2.07174 2
 2 0 -11 -0.5235 2.10061 2
 0 0 -11 -2.1384 2.31409 4
 2 0 11 22.484 3.5615 2
 -2 0 -11 26.8179 3.69473 2
 -2 0 -11 16.1866 2.56256 4
 -4 0 -11 -3.1129 2.35395 2
 -4 0 -11 -1.9552 2.53103 4
 4 0 11 -3.8881 2.26201 2
 6 0 11 -2.5509 2.40635 2
 -6 0 -11 -0.62 2.59856 2
 -6 0 -11 0.56605 2.67154 4
 6 0 11 -4.1111 2.86734 5
 -8 0 -11 4.01522 3.28316 4
 8 0 11 -6.0294 3.2063 5
 -8 0 -11 -1.6433 2.80182 2
 8 0 11 0.18663 2.86875 2
 10 0 11 0.37248 3.01411 2
 -10 0 -11 3.48555 3.29341 2
 10 0 11 -2.3712 3.78381 5
 12 0 11 1.71933 3.93778 5
 -12 0 -11 3.73207 3.94414 2
 12 0 11 2.96273 3.30657 2
 14 0 11 2.42737 3.71264 2
 14 0 11 -2.9519 4.47385 5
 -14 0 -11 -0.3872 4.02788 2
 16 0 11 9.89938 4.71235 2
 -16 0 -11 -2.0312 5.22742 2
 16 0 11 -0.167 5.0364 5
 16 0 11 -1.7355 4.10513 2
 18 0 11 4.38183 5.32427 2
 18 0 11 -0.2382 4.72036 2
 -18 0 -11 -6.4431 6.2866 2
 33 -1 -11 18.1991 5.01839 2
 33 -1 -11 20.3068 7.14923 6
 -33 1 11 9.64735 5.21798 2
 33 1 -11 34.1125 5.75236 2
 31 -1 -11 56.2202 7.61951 2
 31 -1 -11 41.6653 7.76422 6
 31 -1 -11 39.6902 5.57613 2
 31 1 -11 46.6943 8.42618 2
 29 -1 -11 5.81018 4.92896 6
 29 -1 -11 -3.1637 3.61052 2
 29 1 -11 2.96083 4.24945 2
 -29 1 11 -4.5337 4.2914 2
 27 -1 -11 -2.475 3.42679 2
 27 -1 -11 1.3764 4.1429 6
 -27 -1 11 -3.7241 3.59583 2
 27 1 -11 -1.892 3.86936 2
 27 1 -11 -6.2642 3.80247 2
 -27 1 11 -1.6697 4.29117 2
 -25 -1 11 12.0196 4.32466 2
 25 -1 -11 9.76916 3.35177 2
 -25 1 11 14.2866 4.37019 2
 25 1 -11 14.5219 3.99048 2
 23 -1 -11 25.3194 4.27175 6
 23 -1 -11 27.5692 4.88138 2
 -23 -1 11 23.6717 4.20649 2
 23 1 -11 27.7293 3.95902 2
 -23 1 11 31.7937 5.4506 2
 21 -1 -11 67.2023 4.74819 6
 21 -1 -11 71.7689 5.35102 2
 -21 -1 11 78.4893 5.94877 2
 -21 1 11 74.1366 5.98855 2
 21 1 -11 60.2547 5.40221 2
 19 -1 -11 338.975 13.4609 2
 -19 -1 11 361.205 13.6002 2
 -19 1 11 378.959 13.92 2
 19 1 -11 340.949 13.4325 2
 17 -1 -11 371.508 14.0111 2
 -17 -1 11 392.495 14.1368 2
 17 1 -11 362.345 13.9031 2
 -17 1 11 374.024 14.1081 2
 15 -1 -11 343.937 13.1914 2
 -15 -1 11 355.66 13.1377 2
 -15 1 11 351.985 14.1501 6
 15 1 -11 357.59 13.1921 2
 -15 1 11 359.931 13.3779 2
 13 -1 -11 198.733 8.48939 2
 -13 -1 11 222.955 8.40211 2
 -13 1 11 191.42 8.60439 2
 13 1 -11 210.316 8.32038 2
 11 -1 -11 44.4274 3.90751 2
 -11 -1 11 55.046 3.81229 2
 -11 1 11 38.6363 4.20158 2
 11 1 -11 53.7268 3.82813 2
 9 -1 -11 23.6964 3.5642 2
 -9 -1 11 31.223 3.0947 2
 9 1 -11 28.2229 3.16344 2
 -9 1 11 23.2121 3.42528 2
 -7 -1 11 447.669 16.1197 4
 7 -1 -11 438.196 15.9763 2
 -7 -1 11 450.613 15.6805 2
 -7 1 11 460.678 16.0674 2
 7 1 -11 444.194 15.6733 2
 7 1 -11 450.602 16.9149 1
 -7 1 11 434.206 15.4434 4
 -5 -1 11 277.467 10.8251 4
 -5 -1 11 282.145 10.2394 2
 5 -1 -11 282.887 10.7587 2
 5 1 -11 271.783 10.2579 2
 -5 1 11 288.583 10.6938 2
 3 -1 -11 36.5787 3.85777 2
 -3 -1 11 36.3326 4.23317 4
 -3 -1 11 37.549 3.03739 1
 3 -1 -11 37.5453 3.23482 4
 -3 -1 11 36.2804 3.22063 2
 3 1 -11 35.8232 3.10458 3
 -3 1 11 35.7217 4.01132 2
 3 1 -11 38.419 3.24175 2
 1 -1 -11 33.4649 3.39545 4
 1 -1 -11 33.244 3.90274 2
 -1 -1 11 40.8592 3.10923 1
 -1 -1 11 36.447 3.42023 2
 1 1 -11 38.1713 2.88677 3
 -1 1 11 36.2963 3.93056 2
 1 1 -11 31.8633 3.31387 2
 1 1 -11 33.1123 3.40427 4
 -1 -1 -11 5.0864 2.34465 4
 1 -1 11 8.51381 2.0621 2
 -1 -1 -11 11.5471 2.54819 2
 1 1 11 7.93491 2.52701 2
 -1 1 -11 10.6017 2.20866 2
 -1 1 -11 8.00593 2.45175 4
 3 -1 11 10.7808 2.45471 2
 -3 -1 -11 10.87 2.75 2
 3 1 11 10.762 2.90663 2
 -3 1 -11 9.9205 2.38846 2
 -3 1 -11 9.97737 2.75499 4
 5 -1 11 154.748 8.54332 5
 -5 -1 -11 164.411 7.86789 2
 5 -1 11 166.766 7.39118 2
 -5 1 -11 169.375 7.94886 4
 5 1 11 165.931 7.76114 2
 -5 1 -11 156.811 7.39965 2
 -7 -1 -11 138.379 7.64185 2
 7 -1 11 130.913 7.94682 5
 7 -1 11 140.33 6.98156 2
 7 1 11 122.658 7.21818 5
 -7 1 -11 138.391 7.22586 2
 7 1 11 139.192 7.49001 2
 -7 1 -11 142.993 7.75385 4
 -9 -1 -11 43.4066 5.61445 2
 9 -1 11 55.5689 5.66883 5
 -9 1 -11 46.4678 5.91267 4
 9 1 11 35.3551 5.31614 5
 -9 1 -11 40.7261 5.99627 2
 9 1 11 48.3597 5.88952 2
 11 -1 11 42.373 6.96488 5
 -11 -1 -11 60.5943 6.87146 2
 11 -1 11 53.4109 5.74278 2
 11 1 11 44.9498 6.11387 5
 11 1 11 51.9176 5.92403 2
 -11 1 -11 40.6091 6.76967 4
 -11 1 -11 55.7559 6.9467 2
 13 -1 11 75.2608 7.17467 2
 13 -1 11 63.5696 8.30904 5
 -13 -1 -11 65.4743 7.68073 2
 -13 1 -11 67.2182 7.59336 2
 13 1 11 60.183 6.87177 5
 -13 1 -11 74.8601 7.9717 4
 13 1 11 79.3358 7.32996 2
 15 -1 11 46.9134 5.54148 2
 -15 -1 -11 32.8526 5.44033 2
 15 -1 11 36.0973 6.2131 5
 15 -1 11 35.4473 5.15632 2
 15 1 11 41.4927 6.28348 2
 15 1 11 38.9603 5.74556 5
 -15 1 -11 37.5834 5.90545 2
 -17 -1 -11 22.1221 5.49304 2
 17 -1 11 13.584 5.26366 2
 17 -1 11 16.0802 5.33741 2
 17 1 11 16.5 4.34064 2
 34 -2 -11 5.16004 5.14718 2
 34 2 -11 22.2917 5.84888 2
 32 -2 -11 2.83778 4.76353 2
 32 -2 -11 10.9426 7.01084 6
 32 2 -11 17.353 5.0381 2
 30 -2 -11 -1.0574 5.7205 6
 30 -2 -11 5.12077 4.13494 2
 30 2 -11 3.67807 4.66443 2
 28 -2 -11 8.97749 3.86829 2
 28 -2 -11 10.5263 5.25663 6
 28 2 -11 3.99082 4.08661 2
 -28 2 11 6.66193 4.88533 2
 26 -2 -11 28.5844 4.286 2
 26 -2 -11 32.3794 5.19638 6
 -26 2 11 25.9226 4.93194 2
 26 2 -11 28.3629 4.80143 2
 -24 -2 11 8.82686 3.82137 2
 24 -2 -11 10.3272 3.61739 2
 -24 2 11 18.9263 4.33513 2
 24 2 -11 16.9602 4.09164 2
 24 2 -11 11.4397 3.95895 2
 22 -2 -11 77.5368 6.13819 2
 22 -2 -11 86.7401 6.31732 6
 -22 -2 11 83.5213 6.48831 2
 22 2 -11 88.5675 6.46386 2
 -22 2 11 91.8507 6.4765 2
 20 -2 -11 18.4174 3.22772 2
 -20 -2 11 20.5763 3.55011 2
 -20 2 11 26.9585 4.8656 2
 20 2 -11 22.9883 3.49609 2
 18 -2 -11 137.406 6.8911 2
 -18 -2 11 133.97 6.88388 2
 18 2 -11 128.157 6.82994 2
 -18 2 11 135.388 6.96542 2
 16 -2 -11 -2.5981 2.43611 2
 -16 2 11 2.17962 2.67548 2
 16 2 -11 -4.0266 2.41343 2
 -16 2 11 2.25738 2.77978 6
 14 -2 -11 -4.0825 2.26266 2
 14 2 -11 -3.7167 2.2117 2
 -14 2 11 -2.4096 2.48877 2
 -14 2 11 -5.0791 2.76605 6
 -12 -2 11 36.6385 2.9257 6
 12 -2 -11 35.4762 4.08576 2
 -12 -2 11 37.1339 3.56512 2
 12 2 -11 38.5129 3.59765 2
 -12 2 11 31.4953 4.12902 2
 -10 -2 11 91.555 4.51583 2
 10 -2 -11 82.2894 5.20735 2
 -10 -2 11 84.5231 4.7256 6
 10 2 -11 95.5472 5.36408 1
 10 2 -11 89.2796 4.5114 2
 -10 2 11 82.6463 5.22299 2
 -8 -2 11 1.7421 1.77512 2
 8 -2 -11 -1.3903 2.24226 2
 8 2 -11 0.04527 2.39767 3
 8 2 -11 2.18275 1.66255 2
 8 2 -11 0.20932 2.78883 1
 -8 2 11 -0.4254 2.34845 2
 6 -2 -11 9.97288 2.63764 2
 -6 -2 11 10.5997 1.79345 2
 -6 -2 11 5.82965 2.84062 4
 6 2 -11 10.2089 1.92966 2
 -6 2 11 6.53062 2.43891 2
 6 2 -11 8.07987 2.46814 3
 6 2 -11 11.1972 2.83262 1
 4 -2 -11 229.204 8.33167 4
 -4 -2 11 212.999 8.36789 2
 -4 -2 11 225.977 9.57317 4
 -4 -2 11 237.224 9.64428 1
 4 -2 -11 230.763 9.35338 2
 -4 2 11 232.895 9.35379 2
 4 2 -11 221.69 9.14772 3
 2 -2 -11 66.7795 4.9435 2
 -2 -2 11 57.0402 4.5935 1
 -2 -2 11 59.108 3.52544 2
 2 -2 -11 66.1242 3.86762 4
 -2 -2 11 62.4381 5.31576 4
 2 2 -11 59.8012 4.07128 3
 -2 2 11 72.844 4.98056 2
 2 2 -11 59.5147 3.54033 2
 0 -2 -11 116.724 6.20955 2
 0 -2 11 110.275 6.60218 4
 0 -2 11 113.981 5.11601 2
 0 -2 11 115.801 6.06144 1
 0 2 -11 111.405 6.24657 4
 0 2 11 120.075 6.08096 2
 0 2 -11 109.117 5.15113 2
 2 -2 11 262.245 10.0183 2
 -2 -2 -11 271.057 11.1768 2
 2 2 11 271.2 11.0235 2
 -2 2 -11 275.759 11.0641 4
 4 -2 11 94.6477 6.71085 5
 -4 -2 -11 92.7821 6.30061 2
 4 -2 11 85.3757 4.92765 2
 4 2 11 88.57 6.16695 2
 -4 2 -11 94.2557 6.01637 4
 -4 2 -11 81.712 5.03126 2
 6 -2 11 0.90615 2.56264 2
 6 -2 11 2.25007 3.80267 5
 -6 -2 -11 3.11368 3.24999 2
 -6 2 -11 5.42374 2.91337 2
 -6 2 -11 1.70791 2.98391 4
 6 2 11 -0.8868 3.03191 2
 8 -2 11 -2.3747 3.97085 5
 -8 -2 -11 0.36732 3.45205 2
 8 -2 11 -2.3434 2.75182 2
 8 2 11 -0.8838 3.03505 2
 -8 2 -11 1.28224 3.1912 4
 8 2 11 2.01383 3.05467 5
 10 -2 11 6.18526 3.1324 2
 -10 -2 -11 4.62095 3.71788 2
 10 -2 11 -0.5262 4.05393 5
 -10 2 -11 3.93399 3.59049 4
 10 2 11 4.37523 3.52533 2
 -10 2 -11 11.1166 3.78754 2
 10 2 11 0.07427 3.47992 5
 12 -2 11 18.5142 4.15634 2
 12 -2 11 28.2557 5.60765 5
 -12 -2 -11 25.4932 4.78933 2
 12 -2 11 20.4206 4.09852 2
 -12 2 -11 19.3346 4.21908 4
 12 2 11 21.9594 4.14121 5
 12 2 11 24.7335 4.26161 2
 -14 -2 -11 2.25604 4.40234 2
 14 -2 11 -1.6405 3.86439 2
 14 -2 11 -3.5558 5.02965 5
 14 -2 11 2.90169 4.20338 2
 14 2 11 0.53978 3.64508 2
 -14 2 -11 -0.5412 3.92882 4
 16 -2 11 -6.2603 5.50205 5
 16 -2 11 -6.9687 4.73819 2
 16 -2 11 -3.5502 4.93084 2
 -16 -2 -11 -9.4681 4.61115 2
 -16 2 -11 -5.5577 4.29374 4
 16 2 11 2.31584 3.87513 2
 33 -3 -11 3.04144 6.55027 2
 31 -3 -11 4.11732 8.16155 6
 31 -3 -11 17.2088 5.73422 2
 -31 3 11 11.9277 6.33108 2
 31 3 -11 25.5948 6.02339 2
 29 -3 -11 -6.8738 6.62865 6
 29 -3 -11 3.95871 4.55799 2
 29 3 -11 3.81685 4.77918 2
 -29 3 11 7.65998 6.00109 2
 27 -3 -11 7.16331 6.19578 6
 27 -3 -11 7.35607 4.10642 2
 -27 3 11 6.18909 5.0515 2
 27 3 -11 9.77429 4.49165 2
 25 -3 -11 139.408 8.59534 2
 25 -3 -11 142.996 9.58177 6
 25 3 -11 143.943 8.87567 2
 -25 3 11 132.553 8.88213 2
 23 -3 -11 -2.8033 3.51036 2
 -23 3 11 7.07702 3.995 2
 23 3 -11 -2.3488 3.85953 2
 21 -3 -11 100.566 7.09865 2
 21 3 -11 115.061 7.14724 2
 21 3 -11 109.764 5.80669 6
 -21 3 11 112.761 7.45907 2
 -19 -3 11 166.885 8.10476 2
 19 -3 -11 167.17 8.19013 2
 19 3 -11 166.903 7.60738 6
 -19 3 11 177.92 8.66443 2
 19 3 -11 178.651 8.63128 2
 19 3 -11 168.705 8.32917 2
 17 -3 -11 142.98 7.34574 2
 -17 -3 11 153.618 7.21955 2
 -17 3 11 152.477 8.45383 6
 -17 3 11 153.393 7.79486 2
 17 3 -11 150.142 7.78501 3
 17 3 -11 139.307 7.28409 2
 -15 -3 11 170.339 7.46369 2
 15 -3 -11 164.963 7.67746 2
 15 3 -11 161.296 7.47711 2
 -15 3 11 164.499 8.05362 2
 -15 3 11 158.77 8.83112 6
 15 3 -11 175.759 8.12248 3
 -13 -3 11 308.049 11.0675 2
 13 -3 -11 286.526 11.4036 2
 -13 3 11 281.445 11.5909 2
 -13 3 11 289.026 13.0674 6
 13 3 -11 299.379 11.0707 2
 13 3 -11 282.683 11.7409 3
 -11 -3 11 16.3096 2.42924 2
 -11 -3 11 19.3391 3.127 6
 11 -3 -11 13.5213 2.89447 2
 11 3 -11 20.598 2.5552 2
 -11 3 11 17.3129 3.08446 2
 11 3 -11 21.886 3.95097 1
 11 3 -11 13.574 3.09164 3
 9 -3 -11 113.23 5.98871 2
 -9 -3 11 111.562 5.04674 2
 -9 -3 11 106.616 6.17811 6
 -9 3 11 113.418 6.11204 2
 9 3 -11 108.324 4.99897 2
 9 3 -11 104.591 6.11636 3
 9 3 -11 112.692 6.39193 1
 -7 -3 11 165.471 6.36186 2
 7 -3 -11 146.51 7.51505 1
 7 -3 -11 162.329 7.52771 2
 -7 -3 11 158.49 8.05883 6
 -7 3 11 163.527 7.49344 2
 7 3 -11 166.497 7.54817 3
 7 3 -11 162.796 7.84525 1
 7 3 -11 161.5 6.26596 2
 5 -3 -11 13.0315 2.88438 2
 -5 -3 11 6.56631 3.26208 4
 -5 -3 11 10.3476 1.73486 2
 5 -3 -11 10.7616 2.97592 1
 5 3 -11 12.9362 2.85597 3
 -5 3 11 11.8762 2.86524 2
 -3 -3 11 0.52914 3.09699 4
 -3 -3 11 -2.4126 3.2717 1
 3 -3 -11 1.19773 2.56918 2
 -3 3 11 2.96625 2.74138 2
 3 3 -11 1.3797 2.53246 3
 -1 -3 11 10.6836 3.3043 4
 -1 -3 11 9.01414 3.74329 1
 1 -3 -11 10.4312 2.97402 2
 -1 3 11 9.58076 2.93707 2
 -1 -3 -11 1.35974 2.97257 2
 1 -3 11 1.53276 3.55122 5
 1 -3 11 0.95592 3.48814 4
 1 -3 11 -3.4582 3.39633 1
 1 -3 11 -1.4236 2.82041 3
 1 -3 11 -0.5765 1.77303 2
 1 3 11 -0.9452 2.90712 1
 1 3 11 0.50827 2.78483 2
 -3 -3 -11 3.43398 3.32795 2
 3 -3 11 2.07978 3.64163 1
 3 -3 11 3.3647 3.14667 3
 3 -3 11 1.69733 2.21101 2
 -3 -3 -11 3.83546 2.25587 3
 3 -3 11 3.15086 3.79413 5
 3 3 11 1.22399 3.11238 2
 -3 3 -11 5.13376 2.99528 4
 3 3 11 3.4979 3.3838 1
 -5 -3 -11 10.9343 3.87791 2
 5 -3 11 9.87714 4.43831 5
 5 -3 11 9.29924 2.45763 2
 5 -3 11 8.50623 3.46082 3
 -5 3 -11 9.83093 3.61929 4
 5 3 11 15.6808 3.94776 1
 5 3 11 5.08177 3.70233 2
 7 -3 11 18.4703 3.07613 2
 7 -3 11 23.355 4.90404 5
 7 -3 11 25.3871 3.25507 2
 7 -3 11 26.0364 3.80848 3
 -7 -3 -11 25.5553 4.83395 2
 7 3 11 15.3611 4.05638 2
 -7 3 -11 17.0053 4.2928 4
 -9 -3 -11 45.0858 7.00232 2
 9 -3 11 54.0985 7.60102 5
 9 -3 11 49.1716 5.36844 3
 9 -3 11 44.7464 5.33515 2
 9 -3 11 42.2569 5.48207 2
 9 3 11 46.2856 6.10746 2
 9 3 11 32.8156 4.66583 5
 -9 3 -11 44.0436 6.65368 4
 11 -3 11 56.3343 5.91128 2
 11 -3 11 44.0277 5.82755 2
 11 -3 11 48.0482 6.05535 3
 11 3 11 46.7523 5.15651 5
 -11 3 -11 54.6654 7.21597 4
 13 -3 11 119.674 7.68455 3
 13 -3 11 104.986 8.18834 2
 -13 -3 -11 123.359 10.0285 2
 13 -3 11 104.401 10.1236 5
 -13 3 -11 113.716 8.71071 4
 13 3 11 118.346 8.26406 2
 15 -3 11 -6.5046 5.50675 5
 15 -3 11 3.98799 4.67704 2
 -15 -3 -11 -4.3619 4.95483 2
 15 3 11 8.08823 3.88431 2
 -15 3 -11 -0.6399 4.37513 4
 30 -4 -11 18.7629 6.47961 2
 30 -4 -11 27.0907 9.48533 6
 -30 4 11 31.8526 8.00796 2
 30 4 -11 19.4936 5.98627 2
 30 4 -11 16.623 7.05213 3
 28 -4 -11 31.1473 6.55155 2
 28 -4 -11 46.6723 8.7162 6
 28 4 -11 43.8641 6.80247 3
 28 4 -11 44.8439 6.81841 2
 -28 4 11 47.3686 8.52428 2
 26 -4 -11 79.1675 8.32585 2
 26 4 -11 75.8503 7.52728 6
 -26 4 11 73.1915 8.52384 2
 26 4 -11 79.3468 8.3065 3
 26 4 -11 83.7555 9.54053 2
 24 -4 -11 12.0505 4.46206 2
 24 4 -11 18.1945 4.93729 6
 24 4 -11 7.88128 4.94115 2
 -24 4 11 13.8695 5.07427 2
 24 4 -11 16.2228 4.92385 3
 22 -4 -11 -4.4003 3.59591 2
 22 4 -11 -3.7738 4.19605 2
 22 4 -11 0.23388 4.1628 3
 -22 4 11 2.46585 4.40166 2
 22 4 -11 0.94015 3.92013 6
 20 -4 -11 11.1573 3.97073 2
 -20 4 11 13.6857 3.65769 4
 20 4 -11 16.921 4.23798 3
 20 4 -11 16.4538 4.32209 2
 20 4 -11 22.3374 4.0552 6
 -20 4 11 11.9889 4.28124 2
 18 4 -11 83.8159 5.89671 6
 -18 4 11 89.0012 6.79137 2
 18 4 -11 82.4888 6.72118 2
 -18 4 11 77.3086 5.20212 4
 -18 4 11 84.2717 7.59878 6
 18 4 -11 81.102 6.52075 3
 16 -4 -11 6.48175 3.25727 2
 16 4 -11 17.9221 3.7896 6
 16 4 -11 12.807 3.46195 2
 -16 4 11 12.9544 5.10428 6
 16 4 -11 17.0212 4.76026 1
 -16 4 11 14.189 3.88993 2
 16 4 -11 13.4491 3.75815 3
 14 -4 -11 10.395 3.21104 2
 14 4 -11 16.8649 3.5724 3
 -14 4 11 16.2676 5.3157 6
 14 4 -11 25.7787 4.94827 1
 14 4 -11 12.017 3.0373 2
 -14 4 11 19.2082 3.60816 2
 12 -4 -11 5.51112 3.0204 2
 -12 4 11 8.64535 4.60016 6
 12 4 -11 11.3371 4.14279 1
 12 4 -11 9.7888 2.7342 2
 12 4 -11 12.824 3.49178 3
 -10 -4 11 64.1715 5.83491 6
 10 -4 -11 70.9884 5.21905 2
 10 4 -11 72.0277 5.68345 3
 10 4 -11 73.3937 4.35044 2
 10 4 -11 67.1859 6.2099 1
 -10 4 11 70.3753 5.62365 2
 8 -4 -11 90.4998 5.9206 2
 8 -4 -11 85.1768 6.04165 1
 -8 -4 11 91.2856 6.58189 6
 8 4 -11 93.2783 4.30334 2
 8 4 -11 85.4984 6.43439 1
 8 4 -11 82.8206 6.01012 3
 -8 4 11 92.0246 6.40947 2
 6 -4 -11 31.9546 4.91148 2
 -6 -4 11 35.1506 5.42603 4
 -6 -4 11 38.4846 5.29787 6
 6 -4 -11 39.3266 4.71998 1
 6 4 -11 31.9556 4.58249 3
 -6 4 11 42.2688 5.2022 2
 -4 -4 11 176.984 9.05764 4
 -4 -4 11 176.972 9.21111 1
 -4 -4 11 185.342 9.72953 6
 4 -4 -11 170.327 8.57699 2
 -4 -4 11 172.274 9.33256 5
 -4 4 11 178.186 8.72554 2
 -2 -4 11 32.2288 4.91553 3
 -2 -4 11 36.7001 5.08141 1
 -2 -4 11 34.0095 6.37547 5
 -2 -4 11 33.6906 6.03137 6
 2 -4 -11 31.9152 5.31868 2
 -2 -4 11 36.1505 5.96336 4
 -2 4 11 33.1908 5.54579 2
 0 -4 -11 131.424 7.73329 2
 0 -4 11 126.767 8.82362 6
 0 -4 11 136.644 7.54389 3
 0 -4 11 128.864 7.91713 4
 0 -4 11 119.259 8.06453 1
 0 -4 11 128.486 8.51838 5
 0 4 11 117.539 7.65195 2
 -2 -4 -11 119.177 7.93144 2
 2 -4 11 130.208 7.43687 3
 2 -4 11 116.405 7.8955 1
 -2 -4 -11 115.325 6.51145 3
 2 -4 11 118.273 8.35219 5
 2 -4 11 104.502 7.74947 4
 2 4 11 112.014 7.49975 2
 2 4 11 115.269 7.26824 1
 4 -4 11 43.0129 5.88571 5
 -4 -4 -11 31.4158 4.65241 2
 -4 -4 -11 26.8522 4.62915 3
 4 -4 11 42.5498 5.75445 1
 4 -4 11 36.63 6.10616 3
 4 4 11 29.1909 5.71021 1
 4 4 11 33.5896 4.3477 2
 6 -4 11 3.78755 4.38743 5
 6 -4 11 1.40811 4.83153 1
 -6 -4 -11 3.48729 4.32451 2
 6 -4 11 -0.4584 3.8575 3
 6 4 11 -2.3101 4.78871 1
 6 4 11 -1.1406 3.43334 2
 -6 4 -11 -5.3137 3.57085 4
 -8 -4 -11 4.6141 4.46443 2
 8 -4 11 1.38766 2.99654 2
 8 -4 11 0.60044 4.65892 5
 8 -4 11 -4.6981 4.16429 3
 -8 4 -11 -2.5162 3.87791 4
 8 4 11 5.95986 5.31029 1
 8 4 11 0.54676 3.65153 2
 10 -4 11 0.47249 5.01799 5
 10 -4 11 0.02857 4.67703 3
 10 -4 11 5.22017 3.45261 2
 -10 -4 -11 12.3613 4.85475 2
 10 -4 11 3.30002 3.60343 2
 10 4 11 0.95276 3.84868 2
 10 4 11 1.95209 5.95419 1
 -10 4 -11 -4.1981 4.14545 4
 12 -4 11 0.90307 5.91674 5
 -12 -4 -11 16.9838 5.3731 2
 12 -4 11 8.16439 5.08251 3
 12 4 11 10.8909 4.06506 2
 -12 4 -11 10.9405 4.59298 4
 12 4 11 4.7315 6.89108 1
 14 -4 11 11.3058 5.01923 2
 14 -4 11 13.9146 5.61085 3
 14 -4 11 7.74917 6.21472 5
 -14 -4 -11 6.95514 5.60563 2
 14 4 11 14.1238 4.14434 2
 -14 4 -11 16.1294 5.06751 4
 29 -5 -11 -10.76 6.87668 2
 29 5 -11 6.97888 6.78225 3
 29 5 -11 -11.902 6.36248 2
 -29 5 11 -10.882 7.32594 4
 -27 5 11 -4.3114 6.68508 2
 27 5 -11 1.18163 6.92288 6
 27 5 -11 9.0153 6.12875 3
 -27 5 11 -4.2111 6.36319 4
 25 5 -11 -3.7115 5.55833 2
 -25 5 11 5.42334 5.61346 4
 25 5 -11 10.8249 6.31501 6
 25 5 -11 19.2863 5.85963 3
 -25 5 11 17.9108 6.19083 2
 -23 5 11 26.249 5.15051 4
 23 5 -11 38.053 6.86515 3
 23 5 -11 17.3805 5.67286 2
 23 5 -11 24.3358 6.04618 6
 -21 5 11 0.51973 4.00856 4
 21 5 -11 5.3002 4.22462 3
 21 5 -11 0.16281 5.0535 6
 21 5 -11 -1.4615 5.48 1
 19 -5 -11 -3.4483 3.94299 2
 19 5 -11 2.99279 4.60713 6
 -19 5 11 0.71989 4.27376 2
 19 5 -11 -3.2476 5.16178 1
 19 5 -11 -0.9678 3.97511 3
 19 5 -11 0.06499 4.51953 2
 -19 5 11 2.98699 6.37069 6
 17 5 -11 1.87915 4.06341 2
 -17 5 11 -1.6342 5.84665 6
 17 5 -11 7.48928 4.07284 3
 17 5 -11 8.39974 4.78254 6
 17 5 -11 6.51445 5.23108 1
 15 -5 -11 13.6439 4.02176 2
 15 5 -11 12.3695 3.75948 2
 -15 5 11 11.4535 4.35398 2
 15 5 -11 17.3644 5.49513 1
 15 5 -11 13.5298 4.23981 3
 -15 5 11 16.8743 6.31204 6
 13 -5 -11 6.13304 3.72875 2
 13 5 -11 -2.6673 4.74987 1
 -13 5 11 4.86956 3.74235 2
 13 5 -11 0.40166 3.44002 2
 13 5 -11 2.59607 3.82262 3
 -13 5 11 4.17133 5.7272 6
 11 -5 -11 10.262 4.79604 1
 11 5 -11 7.08558 4.57857 1
 -11 5 11 5.6939 3.63021 2
 11 5 -11 2.93788 2.90721 2
 11 5 -11 2.6872 3.81929 3
 -11 5 11 9.80324 5.68877 6
 9 -5 -11 13.7142 3.80705 2
 9 -5 -11 4.28549 4.97467 1
 -9 -5 11 11.0812 4.51854 5
 -9 5 11 5.02952 5.85171 6
 -9 5 11 11.7471 3.73855 2
 9 5 -11 11.6448 3.98259 3
 -7 -5 11 13.6935 4.4834 4
 -7 -5 11 11.6234 5.4436 6
 -7 -5 11 13.6123 4.6658 5
 -7 5 11 15.6704 3.81566 2
 -5 -5 11 12.88 4.12477 3
 -5 -5 11 18.5869 5.48776 6
 -5 -5 11 13.908 4.49262 4
 5 -5 -11 23.866 5.07239 1
 5 -5 -11 15.9898 3.88962 2
 -5 -5 11 15.5386 4.78588 5
 -3 -5 11 115.461 8.49861 1
 -3 -5 11 120.859 7.80435 3
 3 -5 -11 114.108 7.58173 2
 -3 -5 11 105.325 9.32988 6
 -3 -5 11 105.785 8.70483 5
 -3 -5 11 115.078 8.25918 4
 -3 5 11 119.688 7.96592 2
 -1 -5 11 13.4197 4.56823 3
 -1 5 11 10.5348 4.00989 2
 1 -5 11 1.66859 5.77304 6
 1 -5 11 1.61658 4.42495 3
 -1 -5 -11 2.91256 3.89644 3
 1 -5 11 4.64204 5.13846 5
 -1 -5 -11 8.61204 4.26592 2
 1 -5 11 -6.0974 5.18507 1
 1 -5 11 6.96556 4.70548 4
 -3 -5 -11 3.13658 4.62077 2
 -3 -5 -11 -1.2133 4.01876 3
 3 -5 11 1.50002 5.00887 1
 3 -5 11 5.58724 6.02173 6
 3 -5 11 0.47295 4.56839 3
 3 -5 11 -2.1311 4.61848 5
 3 5 11 0.78576 4.75499 1
 3 5 11 -5.6432 3.7797 2
 -5 -5 -11 8.48803 4.6652 2
 -5 -5 -11 1.84291 4.13327 3
 5 -5 11 7.53745 6.34066 6
 5 -5 11 2.56393 4.74507 3
 5 -5 11 3.52224 5.04802 5
 5 -5 11 6.41915 5.23511 1
 5 5 11 2.13539 3.88755 2
 5 5 11 -1.0387 5.05799 1
 7 -5 11 -2.2836 5.46466 5
 7 -5 11 1.12204 6.05593 6
 -7 -5 -11 4.5375 5.28763 2
 7 -5 11 7.66276 5.80374 1
 7 -5 11 2.43869 4.87164 3
 7 5 11 3.57032 4.16427 2
 7 5 11 -6.4879 5.86186 1
 9 -5 11 6.46132 5.60304 3
 9 -5 11 4.39454 6.60543 6
 -9 -5 -11 13.4667 5.30036 2
 9 -5 11 9.80837 6.08383 5
 9 -5 11 10.3047 6.62732 1
 9 5 11 8.14828 7.06722 1
 -9 5 -11 1.91472 4.25481 4
 11 -5 11 5.34012 7.12936 6
 -11 -5 -11 11.9096 5.63614 2
 11 -5 11 3.78112 6.09922 3
 11 -5 11 7.58237 5.38031 5
 -11 5 -11 3.56195 4.56565 4
 11 5 11 2.48348 7.78775 1
 -24 6 11 28.2042 6.64427 4
 24 6 -11 34.196 6.86099 1
 24 6 -11 30.8443 7.87527 2
 24 6 -11 55.0681 8.71475 3
 22 6 -11 1.94931 5.884 1
 -22 6 11 -10.425 5.86506 2
 22 6 -11 -7.7437 5.89846 2
 22 6 -11 2.48231 4.89726 3
 22 6 -11 10.5737 7.16344 6
 20 -6 -11 23.4414 5.63027 2
 20 6 -11 28.9449 5.97182 2
 20 6 -11 28.9496 5.22587 3
 20 6 -11 35.7982 7.24712 6
 18 6 -11 28.9141 5.67071 2
 -18 6 11 31.4584 5.86337 2
 18 6 -11 33.1925 6.53883 1
 -18 6 11 27.5634 7.70796 6
 18 6 -11 30.6169 7.08694 6
 18 6 -11 26.8799 5.03744 3
 16 6 -11 0.1746 4.2227 3
 16 6 -11 2.65218 4.61006 2
 -16 6 11 -2.8053 6.67375 6
 -16 6 11 -2.2924 5.21099 2
 16 6 -11 13.3432 6.46008 6
 16 6 -11 -3.2432 5.15506 1
 14 -6 -11 -1.07 5.59313 1
 14 6 -11 -2.1741 4.665 1
 14 6 -11 2.69796 4.07677 3
 -14 6 11 -7.9581 6.54901 6
 -14 6 11 3.61633 4.76451 2
 14 6 -11 -4.8827 4.06147 2
 12 -6 -11 22.9842 6.04934 1
 -12 6 11 15.1192 6.99531 6
 -12 6 11 12.058 4.7824 2
 12 6 -11 5.11778 4.78857 1
 10 -6 -11 50.3903 7.0485 1
 10 -6 -11 61.843 7.38005 2
 -10 6 11 51.9242 9.09704 6
 10 6 -11 56.9375 7.12871 1
 -10 6 11 55.9391 7.67205 2
 -8 -6 11 199.928 11.3744 4
 8 -6 -11 206.435 12.1947 1
 -8 -6 11 244.726 13.0692 5
 8 -6 -11 250.318 11.4125 2
 -8 6 11 238.671 11.1298 2
 -8 6 11 207.245 12.963 6
 -6 -6 11 212.393 12.7361 5
 -6 -6 11 190.475 10.8362 3
 -6 -6 11 208.563 11.3269 4
 6 -6 -11 202.485 11.8401 1
 -6 -6 11 218.054 13.0088 6
 6 -6 -11 221.919 10.9326 2
 -6 6 11 189.009 12.3852 6
 -6 6 11 205.856 10.758 2
 4 -6 -11 113.457 8.88068 2
 -4 -6 11 106.047 8.94453 4
 -4 -6 11 85.6004 10.102 6
 -4 -6 11 113.911 9.04792 1
 -4 -6 11 111.766 9.9186 5
 -4 -6 11 94.5356 7.96946 3
 -2 -6 11 19.5783 5.93331 5
 -2 -6 11 21.4776 5.65643 1
 -2 -6 11 17.3966 5.20648 3
 -2 -6 11 17.8425 5.0775 4
 2 -6 -11 27.386 5.30152 2
 -2 -6 11 16.9065 7.13576 6
 -2 6 11 16.3567 5.06411 2
 0 -6 11 30.553 5.66335 4
 0 -6 11 41.3992 7.95976 6
 0 -6 11 40.7311 6.71552 3
 0 -6 11 26.4431 5.88806 1
 0 -6 -11 32.0867 5.67434 3
 0 -6 11 28.0692 6.28299 5
 -2 -6 -11 36.6871 6.02535 3
 2 -6 11 62.1035 10.5768 6
 2 -6 11 46.9831 8.19505 3
 2 -6 11 41.8883 6.85349 1
 -2 -6 -11 51.4212 8.49811 2
 2 -6 11 39.7365 6.87101 5
 2 -6 11 43.026 6.27333 4
 2 6 11 25.4705 5.5742 2
 4 -6 11 53.6982 8.61109 1
 4 -6 11 63.2586 10.5878 6
 -4 -6 -11 45.9032 8.27194 3
 -4 -6 -11 71.483 9.11819 2
 4 -6 11 58.5603 8.26703 3
 4 -6 11 57.1529 9.44114 5
 4 6 11 49.385 8.80925 2
 6 -6 11 19.5777 8.41498 6
 -6 -6 -11 28.6211 6.55589 2
 6 -6 11 25.0582 6.84744 5
 6 -6 11 26.1831 6.69665 3
 6 -6 11 27.5393 7.37797 1
 -6 -6 -11 21.6674 5.83153 3
 6 6 11 24.9877 7.32541 1
 -8 -6 -11 15.7587 6.40183 2
 8 -6 11 19.2128 7.78306 1
 8 -6 11 22.3031 6.87314 5
 8 -6 11 22.4653 6.97701 3
 8 6 11 9.63446 7.89743 1
 21 7 -11 -5.7515 5.50419 3
 19 -7 -11 10.5261 7.09057 1
 -19 7 11 -2.0896 6.85661 2
 19 7 -11 -3.5844 6.22969 1
 19 7 -11 15.5118 9.2222 6
 17 -7 -11 6.22075 7.01699 1
 -17 7 11 15.5109 7.76904 6
 17 7 -11 19.053 9.44994 6
 17 7 -11 6.37475 5.90789 1
 15 -7 -11 19.5697 6.57943 1
 -15 7 11 12.6998 6.80566 2
 15 7 -11 3.14694 5.80833 1
 -15 7 11 3.5837 7.27653 6
 13 -7 -11 9.03225 6.51927 1
 -13 7 11 6.44814 7.51888 6
 13 7 -11 9.45859 5.44687 1
 11 -7 -11 13.4136 5.97114 2
 11 -7 -11 26.3886 7.72746 1
 -11 7 11 20.2699 6.2327 2
 11 7 -11 15.6424 5.50338 1
 -11 7 11 29.5182 8.91302 6
 9 -7 -11 22.3888 7.53656 1
 -9 -7 11 10.9039 5.88286 4
 -9 7 11 22.237 5.80001 2
 -9 7 11 22.1852 8.14436 6
 -7 -7 11 18.6124 8.10382 5
 7 -7 -11 7.87941 7.11019 1
 -7 -7 11 2.21047 5.92648 4
 -7 7 11 13.9006 8.05966 6
 -7 7 11 14.0297 5.86148 2
 5 -7 -11 115.592 10.0852 2
 -5 -7 11 112.542 11.7822 5
 -5 -7 11 102.007 9.7096 4
 -5 -7 11 84.7233 8.52367 3
 -5 7 11 70.1518 10.0564 6
 -5 7 11 93.929 9.82279 2
 -3 -7 11 10.6909 6.02632 4
 3 -7 -11 5.29164 5.81754 3
 -3 -7 11 3.81667 7.22186 5
 -3 -7 11 3.16649 5.49514 3
 3 -7 -11 12.455 6.94001 2
 -3 -7 11 12.8018 8.59918 6
 -3 -7 11 12.5129 6.34048 1
 -1 -7 11 9.86108 7.38126 5
 1 -7 -11 12.7061 7.00774 2
 -1 -7 11 11.0904 6.01132 3
 1 -7 -11 11.2068 6.35361 3
 -1 -7 11 1.03212 9.25945 6
 -1 -7 11 11.238 5.80264 4
 -1 -7 11 10.0853 5.82547 1
 -1 -7 -11 20.249 7.10483 2
 -1 -7 -11 3.66596 6.68333 3
 1 -7 11 7.97078 6.17564 4
 1 -7 11 0.2629 5.75089 3
 1 -7 11 7.40223 6.94642 5
 1 -7 11 -8.1971 6.41154 1
 1 7 11 2.82148 5.27785 5
 1 7 11 8.17902 6.69598 2
 -3 -7 -11 -1.9956 7.02474 3
 3 -7 11 9.5883 8.80167 6
 -3 -7 -11 23.7898 8.12367 2
 3 -7 11 16.7924 7.00589 5
 3 -7 11 2.96476 6.54546 3
 3 -7 11 0.10912 7.05101 1
 3 7 11 4.59252 6.74632 2
 -10 -8 11 0.99563 6.9407 4
 10 -8 -11 4.5554 9.01326 1
 -10 8 11 -2.5822 8.68809 6
 -8 -8 11 -6.2572 7.48747 4
 8 -8 -11 13.0037 8.87988 1
 -8 8 11 34.6226 9.4144 6
 6 -8 -11 7.70092 7.16155 3
 34 0 -12 25.8737 5.38075 2
 32 0 -12 45.5415 5.59725 2
 32 0 -12 55.51 7.0059 6
 -32 0 12 58.9251 6.8287 2
 -30 0 12 35.6521 5.08814 2
 30 0 -12 29.7265 5.21577 2
 30 0 -12 33.9485 5.631 6
 28 0 -12 27.4504 4.75077 6
 28 0 -12 16.4103 4.20752 2
 -28 0 12 25.4645 4.99854 2
 -26 0 12 46.4282 6.54063 2
 26 0 -12 41.2105 4.21248 6
 26 0 -12 33.622 4.34123 2
 -24 0 12 338.16 13.7216 2
 24 0 -12 319.789 13.2451 6
 24 0 -12 329.059 13.2533 2
 22 0 -12 8.44619 3.12257 2
 -22 0 12 5.98792 3.43644 2
 20 0 -12 0.75944 2.72334 2
 -20 0 12 -4.1295 2.9129 2
 -18 0 12 -3.1681 2.57601 2
 18 0 -12 -3.9054 2.35238 2
 -16 0 12 273.622 10.6708 2
 16 0 -12 265.06 10.6128 2
 14 0 -12 430.445 15.9783 2
 -14 0 12 453.709 16.1545 2
 12 0 -12 67.8334 4.472 2
 -12 0 12 73.907 4.61 2
 10 0 -12 228.378 8.85427 2
 -10 0 12 221.749 8.82029 2
 -8 0 12 308.565 11.2443 2
 8 0 -12 290.458 11.2524 2
 -8 0 12 306.574 11.2583 4
 6 0 -12 749.403 25.5021 2
 -6 0 12 735.675 25.4478 2
 -6 0 12 732.051 25.4944 4
 4 0 -12 785.918 27.5807 2
 -4 0 12 806.402 27.5516 2
 4 0 -12 807.696 27.6063 4
 -2 0 12 87.735 4.84309 2
 2 0 -12 66.8455 4.76411 4
 2 0 -12 79.1904 4.71915 2
 0 0 -12 250.836 9.91532 4
 0 0 -12 247.389 9.06947 3
 0 0 12 256.376 9.7809 2
 0 0 -12 245.035 9.78712 2
 2 0 12 21.6983 3.03403 2
 -2 0 -12 23.1388 3.01864 4
 -2 0 -12 21.7066 3.0511 2
 4 0 12 1.68405 2.67327 2
 -4 0 -12 1.59106 2.51478 2
 -4 0 -12 -0.3384 2.69349 4
 -6 0 -12 -1.612 2.85273 2
 6 0 12 1.04924 2.85748 2
 6 0 12 0.05937 3.17449 5
 -6 0 -12 1.71317 3.17124 4
 8 0 12 60.1212 6.41238 5
 -8 0 -12 75.4697 6.66495 4
 8 0 12 75.0504 5.85534 2
 -8 0 -12 75.7304 5.98064 2
 10 0 12 66.948 6.96825 5
 10 0 12 70.6212 6.64029 2
 -10 0 -12 80.3051 7.25355 2
 -10 0 -12 74.234 7.21101 4
 -12 0 -12 29.7772 5.0253 4
 12 0 12 35.109 5.31313 5
 12 0 12 36.2878 4.66231 2
 -12 0 -12 30.6859 5.05399 2
 14 0 12 69.4037 8.84405 5
 14 0 12 70.9971 7.18668 2
 -14 0 -12 72.4249 8.65878 2
 16 0 12 50.9536 6.98483 5
 -16 0 -12 60.7556 7.15207 2
 16 0 12 46.1338 7.89036 2
 16 0 12 72.6681 9.67421 2
 35 -1 -12 0.655 4.75936 2
 35 1 -12 -2.9518 5.34799 2
 35 1 -12 -3.4358 6.19785 6
 33 -1 -12 6.56846 4.6261 2
 33 -1 -12 9.05235 6.50595 6
 33 -1 -12 4.2725 4.08178 2
 33 1 -12 -0.4467 4.85849 2
 31 -1 -12 6.32746 4.30496 2
 31 -1 -12 3.31741 5.29184 6
 31 1 -12 2.34766 4.65426 2
 -31 1 12 0.41013 4.71893 2
 -29 -1 12 14.5165 4.44093 2
 29 -1 -12 14.7423 4.77685 6
 29 -1 -12 15.438 3.96634 2
 -29 1 12 17.213 4.68369 2
 29 1 -12 14.5259 4.43022 2
 29 1 -12 11.1485 4.24137 2
 27 -1 -12 -5.1045 3.83157 6
 27 -1 -12 -0.6131 3.35149 2
 -27 -1 12 -0.5829 3.90404 2
 27 1 -12 2.76333 2.70707 6
 27 1 -12 -5.6076 3.5406 2
 25 -1 -12 6.8539 3.43964 2
 -25 -1 12 10.1738 4.32532 2
 25 -1 -12 9.25683 3.67039 6
 -25 1 12 3.15449 3.97365 2
 25 1 -12 4.51842 3.62461 2
 23 -1 -12 55.0785 5.34234 2
 -23 -1 12 46.5865 6.03729 2
 23 1 -12 40.6056 5.48039 2
 -23 1 12 62.6721 6.08436 2
 -21 -1 12 26.0177 3.63242 2
 21 -1 -12 31.9561 4.67128 2
 -21 1 12 30.6796 4.86275 2
 21 1 -12 29.1353 3.4863 2
 19 -1 -12 26.0522 4.30249 2
 -19 -1 12 27.1069 4.44572 2
 -19 1 12 20.7693 3.49164 2
 19 1 -12 29.8516 4.45024 2
 -17 -1 12 8.03269 2.73007 2
 17 -1 -12 9.63937 2.77727 2
 -17 1 12 9.15672 2.90729 2
 17 1 -12 9.20278 2.72699 2
 15 -1 -12 5.53149 2.4555 2
 -15 -1 12 4.73422 2.46408 2
 -15 1 12 4.55711 2.41354 2
 -15 1 12 5.17596 2.39669 6
 15 1 -12 6.52824 2.50539 2
 -13 -1 12 4.52662 2.28939 2
 13 -1 -12 -0.3692 2.2484 2
 -13 1 12 0.19793 2.45541 2
 13 1 -12 3.72072 2.2913 2
 -11 -1 12 214.058 8.22539 2
 11 -1 -12 203.197 8.43275 2
 11 1 -12 192.531 7.98997 2
 -11 1 12 204.18 8.4293 2
 9 -1 -12 3.50621 2.30614 2
 -9 -1 12 5.47746 2.01989 2
 9 1 -12 5.15786 1.99147 2
 -9 1 12 4.33624 2.25597 2
 -7 -1 12 4.7626 1.90835 2
 -7 -1 12 2.65523 2.55958 4
 7 -1 -12 5.95751 2.35014 2
 7 1 -12 4.19562 2.05981 2
 7 1 -12 1.09155 2.29662 1
 -7 1 12 0.5343 1.88214 4
 -7 1 12 1.34247 2.20673 2
 5 -1 -12 27.4487 3.06527 2
 -5 -1 12 16.9184 2.89003 2
 -5 -1 12 21.5718 2.94925 4
 -5 1 12 22.581 2.8743 2
 5 1 -12 19.2515 3.1473 2
 3 -1 -12 11.1102 2.08225 4
 -3 -1 12 7.88628 2.13758 2
 3 -1 -12 8.39795 2.47626 2
 -3 -1 12 10.1387 2.75553 4
 -3 1 12 7.76253 2.46185 2
 3 1 -12 10.6599 2.18427 2
 3 1 -12 11.0251 2.0981 3
 1 -1 -12 68.0005 4.82495 2
 1 -1 -12 62.9983 4.30511 4
 -1 -1 12 70.9497 4.14304 2
 -1 -1 12 55.2493 3.99614 1
 1 1 -12 61.6067 3.72811 3
 -1 1 12 70.3681 4.83086 2
 1 1 -12 64.5517 4.83146 4
 1 1 -12 68.7075 4.16928 2
 -1 -1 -12 16.7737 2.90716 2
 -1 -1 -12 14.3662 2.72082 4
 1 -1 12 16.6932 2.52805 2
 1 1 12 17.4537 3.14509 2
 -1 1 -12 22.8201 3.04787 4
 -1 1 -12 20.0863 2.65178 2
 -3 -1 -12 10.7611 3.06869 4
 -3 -1 -12 11.151 3.09069 2
 3 -1 12 9.05789 2.59053 2
 -3 1 -12 12.9811 3.0365 4
 -3 1 -12 10.8217 2.62505 2
 3 1 12 11.7339 3.06333 2
 5 -1 12 -0.9863 3.28563 5
 5 -1 12 -0.0394 2.69897 2
 -5 -1 -12 -1.5858 2.81578 2
 5 1 12 -2.6706 2.63738 2
 -5 1 -12 -1.3622 2.49307 2
 -5 1 -12 4.03274 2.97977 4
 -7 -1 -12 0.31993 3.40616 2
 7 -1 12 0.36794 2.96947 2
 -7 1 -12 -4.0646 2.8645 2
 7 1 12 -2.4753 2.95309 2
 -7 1 -12 3.78848 3.10232 4
 7 1 12 -1.9407 3.05942 5
 9 -1 12 2.16561 3.03768 2
 -9 -1 -12 1.22619 3.35343 2
 9 -1 12 0.99059 4.16261 5
 -9 1 -12 0.19022 3.41091 4
 -9 1 -12 6.00187 3.54082 2
 9 1 12 2.32643 3.01972 2
 9 1 12 1.26445 3.44865 5
 11 -1 12 18.7358 4.77512 5
 11 -1 12 12.7897 3.74062 2
 -11 -1 -12 13.787 4.31341 2
 11 1 12 14.1287 4.06955 5
 -11 1 -12 12.8256 4.34073 2
 -11 1 -12 6.05224 3.99187 4
 13 -1 12 6.62623 3.78098 2
 -13 -1 -12 16.1333 4.72222 2
 13 -1 12 9.5372 5.37271 5
 -13 1 -12 6.40752 4.29928 4
 13 1 12 11.8239 3.97227 2
 -13 1 -12 15.9402 4.82057 2
 13 1 12 11.3481 4.85194 5
 15 -1 12 -0.1498 4.26853 2
 15 -1 12 -3.069 5.48845 5
 -15 -1 -12 -0.4337 4.63 2
 15 -1 12 5.42042 5.04093 2
 -15 1 -12 -0.0779 5.894 2
 -15 1 -12 -6.1722 4.41356 4
 15 1 12 -0.9942 4.7606 5
 15 1 12 0.59218 3.68892 2
 17 -1 12 5.96435 5.86712 2
 -17 -1 -12 9.72756 5.35842 2
 -17 1 -12 -4.8903 4.92329 4
 34 -2 -12 21.469 5.50444 2
 34 -2 -12 30.9978 8.59628 6
 32 -2 -12 58.2699 7.74286 2
 32 -2 -12 46.2331 7.48253 6
 -32 2 12 41.0006 6.59156 2
 32 2 -12 59.5256 7.96623 2
 30 -2 -12 7.24527 5.78968 6
 30 -2 -12 10.0136 4.15286 2
 30 2 -12 10.6249 5.0531 2
 28 -2 -12 14.5227 4.08543 2
 28 -2 -12 13.8442 5.57335 6
 28 2 -12 12.0749 4.41538 2
 -28 2 12 17.5657 4.82503 2
 28 2 -12 8.60231 4.14924 2
 26 -2 -12 18.8527 4.91873 6
 26 -2 -12 15.5569 3.97991 2
 -26 -2 12 6.56077 3.77312 2
 26 2 -12 10.0159 4.32111 2
 -24 -2 12 139.678 8.18102 2
 24 -2 -12 128.4 7.7454 2
 -24 2 12 153.12 8.2599 2
 24 2 -12 131.841 8.43755 2
 -22 -2 12 9.24285 3.72558 2
 22 -2 -12 6.97014 3.42724 2
 -22 2 12 8.44698 3.53048 2
 22 2 -12 8.49551 3.31973 2
 -20 -2 12 57.107 5.73589 2
 20 -2 -12 46.0305 5.23295 2
 20 2 -12 49.3374 5.23449 2
 -20 2 12 53.7691 5.61275 2
 18 -2 -12 -1.1494 2.55758 2
 -18 2 12 4.38837 3.05494 6
 -18 2 12 6.00775 2.97076 2
 18 2 -12 -3.5325 2.63262 2
 16 -2 -12 52.675 4.59694 2
 -16 -2 12 45.7557 4.54012 2
 16 2 -12 48.4495 4.58153 2
 -16 2 12 52.8007 5.44046 2
 -16 2 12 58.8112 4.75105 6
 14 -2 -12 93.6907 5.46684 2
 -14 -2 12 94.7239 5.1792 2
 -14 2 12 95.548 5.60445 2
 -14 2 12 91.1495 5.81628 6
 14 2 -12 87.3908 5.13427 2
 -12 -2 12 24.6241 3.36011 2
 12 -2 -12 25.5205 3.94633 2
 -12 -2 12 29.8654 2.87662 6
 12 2 -12 23.8396 3.44627 2
 -12 2 12 23.735 4.10881 2
 -10 -2 12 95.0061 4.81978 2
 10 -2 -12 97.0916 5.62862 2
 -10 2 12 95.5605 5.62104 2
 10 2 -12 91.318 4.70633 2
 10 2 -12 97.1175 5.51663 1
 -8 -2 12 166.559 6.69693 2
 8 -2 -12 168.497 7.49101 2
 8 2 -12 165.629 7.35427 3
 -8 2 12 164.386 7.41618 2
 8 2 -12 165.422 7.54335 1
 8 2 -12 156.556 6.59798 2
 -6 -2 12 384.542 14.4479 4
 -6 -2 12 371.945 13.5216 2
 6 -2 -12 382.502 14.2901 2
 6 2 -12 375.808 13.5712 2
 -6 2 12 395.535 14.402 2
 6 2 -12 387.41 14.3564 3
 -4 -2 12 334.346 12.4207 2
 4 -2 -12 357.197 13.3339 2
 -4 -2 12 354.065 13.9247 1
 -4 -2 12 343.973 13.576 4
 4 -2 -12 361.535 12.4887 4
 -4 2 12 366.702 13.4965 2
 4 2 -12 339.365 12.5052 2
 4 2 -12 351.097 13.2313 3
 2 -2 -12 131.989 5.89763 4
 -2 -2 12 123.542 5.62725 2
 -2 -2 12 131.054 7.22695 4
 2 -2 -12 138.77 6.75554 2
 -2 -2 12 133.066 6.61952 1
 2 2 -12 126.786 6.0181 3
 2 2 -12 128.371 5.68542 2
 -2 2 12 134.965 6.9277 2
 0 -2 12 229.594 9.36513 1
 0 -2 -12 203.465 9.02495 2
 0 -2 12 205.239 8.28299 2
 0 2 -12 212.39 8.36836 2
 0 2 12 213.339 9.06811 2
 0 2 -12 206.665 9.20746 4
 2 -2 12 22.4865 3.67349 2
 -2 -2 -12 30.0197 4.94096 2
 2 2 12 27.2384 3.5951 2
 -2 2 -12 31.0175 3.55781 2
 -2 2 -12 38.6408 4.84468 4
 4 -2 12 1.74378 3.50646 5
 -4 -2 -12 3.23032 3.11689 2
 4 -2 12 2.31001 2.53529 2
 -4 2 -12 4.27007 2.87613 4
 4 2 12 -1.9528 3.07273 2
 6 -2 12 -0.4124 3.93626 5
 6 -2 12 -4.055 2.64562 2
 -6 -2 -12 -0.881 3.41399 2
 -6 2 -12 -0.0568 3.18886 4
 6 2 12 -4.3224 2.96656 2
 8 -2 12 71.4281 7.55882 5
 -8 -2 -12 77.1908 7.27912 2
 8 -2 12 75.9811 5.82902 2
 -8 2 -12 80.1195 6.52773 2
 -8 2 -12 82.3487 6.88727 4
 8 2 12 76.3983 6.39704 2
 8 2 12 66.0929 5.95834 5
 10 -2 12 82.4571 6.24151 2
 -10 -2 -12 87.292 7.45676 2
 10 -2 12 84.56 8.34137 5
 10 2 12 65.581 6.50073 5
 -10 2 -12 84.0224 7.23427 4
 10 2 12 87.9867 6.86617 2
 12 -2 12 13.0504 5.18096 5
 12 -2 12 10.4803 4.19194 2
 -12 -2 -12 12.698 4.60125 2
 12 -2 12 4.12743 3.90793 2
 -12 2 -12 6.44808 4.04762 4
 12 2 12 -0.1979 3.51303 2
 14 -2 12 42.7623 5.40988 2
 14 -2 12 50.8712 8.00667 2
 14 -2 12 44.7187 7.28699 5
 -14 -2 -12 47.0753 8.51322 2
 14 2 12 47.1407 6.25595 2
 -14 2 -12 56.2262 7.39412 4
 16 -2 12 26.0333 6.20251 2
 -16 -2 -12 23.8492 6.22546 2
 16 -2 12 33.7962 7.06633 5
 16 -2 12 22.8087 5.6223 2
 -16 2 -12 36.3926 5.57967 4
 16 2 12 25.4181 4.81394 2
 33 -3 -12 -1.7755 5.64754 2
 33 -3 -12 -11.703 9.28332 6
 33 3 -12 8.46125 5.71819 2
 31 -3 -12 6.83324 5.18335 2
 31 -3 -12 3.63074 7.93872 6
 -31 3 12 15.4588 6.23827 2
 31 3 -12 7.31922 5.533 2
 29 -3 -12 2.03075 6.55165 6
 29 -3 -12 3.92815 4.34598 2
 -29 3 12 -0.1578 5.21677 2
 27 -3 -12 38.8231 6.5222 6
 27 -3 -12 31.5071 5.27655 2
 27 3 -12 24.5836 5.48185 2
 -27 3 12 17.5176 5.36166 2
 25 -3 -12 113.864 7.9289 2
 25 3 -12 104.365 8.44082 2
 25 3 -12 120.403 6.27944 6
 -25 3 12 122.381 8.38701 2
 23 -3 -12 -1.8874 3.66558 2
 23 3 -12 2.11934 2.62507 6
 23 3 -12 -7.3969 3.64292 2
 -23 3 12 0.04278 3.89891 2
 21 -3 -12 118.745 7.21081 2
 -21 -3 12 123.188 7.00329 2
 21 3 -12 116.986 7.62679 2
 -21 3 12 119.048 7.81615 2
 21 3 -12 124.972 7.84452 2
 21 3 -12 113.297 5.76496 6
 19 -3 -12 101.896 6.81045 2
 -19 -3 12 110.91 6.6629 2
 19 3 -12 105.437 6.60902 2
 -19 3 12 111.422 7.24603 2
 -19 3 12 113.42 7.27884 6
 17 -3 -12 103.849 6.35391 2
 -17 -3 12 113.18 6.3581 2
 -17 3 12 116.823 7.28525 2
 17 3 -12 90.8991 6.12539 2
 17 3 -12 105.939 6.35942 3
 -17 3 12 96.912 6.80653 6
 -15 -3 12 166.12 7.23632 2
 15 -3 -12 158.815 7.71846 2
 -15 3 12 141.031 8.46799 6
 15 3 -12 151.865 7.21792 2
 15 3 -12 153.568 7.77131 3
 -15 3 12 147.276 7.68252 2
 -13 -3 12 157.4 6.95159 2
 13 -3 -12 150.816 7.41064 2
 13 3 -12 156.526 7.5048 3
 -13 3 12 140.379 8.36776 6
 13 3 -12 164.544 8.17555 1
 13 3 -12 154.051 6.89255 2
 -13 3 12 156.886 7.71459 2
 11 -3 -12 -1.3385 2.66089 2
 -11 -3 12 0.7308 2.8938 6
 -11 -3 12 -3.0444 2.08918 2
 11 3 -12 -3.7308 2.08207 2
 11 3 -12 0.70518 3.31511 1
 11 3 -12 -4.3063 2.63124 3
 -11 3 12 -0.7495 2.61286 2
 -9 -3 12 15.1803 3.30536 6
 9 -3 -12 12.0199 2.7534 2
 9 3 -12 13.315 2.0323 2
 -9 3 12 10.6178 2.90075 2
 9 3 -12 8.19736 2.88014 3
 9 3 -12 10.9217 3.47208 1
 7 -3 -12 1.44125 2.73537 2
 7 -3 -12 0.36272 2.79382 1
 -7 -3 12 -0.9377 3.14521 6
 -7 -3 12 -0.2701 3.16127 4
 -7 -3 12 -0.5247 1.86743 2
 -7 3 12 1.28328 2.62669 2
 7 3 -12 3.68346 3.0782 1
 7 3 -12 4.26449 2.68601 3
 5 -3 -12 13.7964 2.95707 2
 -5 -3 12 9.85884 3.28915 4
 -5 3 12 15.5055 3.04936 2
 5 3 -12 14.0453 2.9353 3
 -3 -3 12 106.559 6.38316 1
 -3 -3 12 100.991 6.79895 4
 3 -3 -12 106.122 6.27744 2
 3 3 -12 102.111 5.74633 3
 -3 3 12 100.886 6.52336 2
 -1 -3 12 135.455 7.49654 1
 -1 -3 12 130.93 7.8968 4
 1 -3 -12 138.397 7.48654 2
 -1 3 12 133.159 7.38352 2
 1 -3 12 87.0685 4.75889 2
 -1 -3 -12 101.308 6.7839 2
 1 -3 12 87.6456 6.62948 1
 1 -3 12 94.6802 6.98364 5
 1 3 12 96.1634 6.52337 2
 1 3 12 95.3733 5.62894 1
 -3 -3 -12 147.051 6.30008 3
 3 -3 12 148.442 8.23731 1
 3 -3 12 144.083 8.70725 5
 -3 -3 -12 151.305 8.62987 2
 3 -3 12 133.335 6.52417 2
 3 3 12 136.371 8.0963 2
 -3 3 -12 154.951 8.42759 4
 3 3 12 155.651 7.70715 1
 -5 -3 -12 37.1471 4.90164 2
 5 -3 12 37.8263 5.11715 3
 5 -3 12 28.5089 4.06772 2
 5 -3 12 35.3115 6.81699 5
 5 3 12 28.9331 4.34255 2
 5 3 12 42.4002 5.47787 1
 -5 3 -12 37.7103 4.47182 4
 7 -3 12 12.1728 3.60582 3
 -7 -3 -12 13.7693 4.36965 2
 7 -3 12 6.44252 4.73971 5
 7 -3 12 7.57325 3.05808 2
 7 -3 12 8.92908 3.16281 2
 7 3 12 14.1293 4.72388 1
 7 3 12 6.42287 3.5552 2
 -7 3 -12 6.44961 3.94859 4
 9 -3 12 0.68662 3.42582 2
 -9 -3 -12 4.98019 4.24465 2
 9 -3 12 -1.2742 3.52323 2
 9 -3 12 5.01501 4.59381 5
 9 -3 12 -3.3274 3.44349 3
 -9 3 -12 4.27913 3.86228 4
 9 3 12 6.67465 3.7059 2
 11 -3 12 1.61449 4.17113 2
 11 -3 12 17.044 5.61131 5
 11 -3 12 2.83074 3.82285 2
 -11 -3 -12 13.1663 4.70053 2
 -11 3 -12 12.7405 4.25757 4
 11 3 12 8.34708 3.78053 2
 11 3 12 10.0192 3.55169 5
 13 -3 12 11.4716 4.52481 2
 -13 -3 -12 10.5374 5.02908 2
 13 -3 12 4.26945 5.76394 5
 -13 3 -12 18.5372 4.80117 4
 15 -3 12 -3.7361 6.15049 5
 -15 -3 -12 -0.1381 5.73682 2
 15 -3 12 1.37124 5.38039 2
 -15 3 -12 -1.2863 4.59086 4
 15 3 12 -3.2599 3.51349 2
 30 -4 -12 0.20472 5.85316 2
 30 4 -12 4.43346 5.58596 2
 -30 4 12 7.3003 7.06817 2
 30 4 -12 -4.9903 6.01299 6
 30 4 -12 -4.3674 6.40006 3
 28 -4 -12 -5.1568 5.10047 2
 28 4 -12 -1.6753 4.89152 2
 28 4 -12 2.4752 5.45974 6
 28 4 -12 2.99656 5.74143 3
 26 -4 -12 7.70734 4.67557 2
 26 4 -12 -5.2339 4.88809 2
 26 4 -12 8.09287 4.52036 6
 -26 4 12 3.32906 5.23571 2
 26 4 -12 7.79156 4.97828 3
 24 -4 -12 41.3913 6.76403 2
 24 4 -12 46.5895 6.72556 3
 24 4 -12 41.469 5.55391 6
 24 4 -12 41.946 5.53714 2
 22 -4 -12 66.5241 6.44521 2
 22 4 -12 65.3423 7.29995 2
 -22 4 12 63.8889 6.9482 2
 22 4 -12 63.7835 6.74579 3
 22 4 -12 73.1675 5.5748 6
 20 -4 -12 -3.9037 3.58455 2
 20 4 -12 2.06635 3.74984 3
 -20 4 12 4.97886 4.13343 2
 20 4 -12 1.66772 4.02093 2
 -20 4 12 4.7332 3.18502 4
 20 4 -12 6.07418 3.62804 6
 18 -4 -12 24.0652 4.07472 2
 18 4 -12 25.8234 4.16803 2
 -18 4 12 37.6174 6.11346 2
 -18 4 12 30.8319 5.93582 6
 18 4 -12 33.4907 5.27394 3
 16 -4 -12 1.86697 3.15248 2
 -16 4 12 -1.9739 4.97257 6
 16 4 -12 -0.698 3.08833 2
 16 4 -12 7.08164 4.82337 1
 -16 4 12 4.29585 3.64324 2
 16 4 -12 5.43966 3.54134 3
 14 -4 -12 35.8891 5.19915 2
 -14 4 12 45.2847 5.88996 2
 14 4 -12 46.3323 5.39608 3
 -14 4 12 33.0814 6.7948 6
 14 4 -12 52.9036 5.92371 1
 14 4 -12 49.8381 4.80968 2
 12 -4 -12 19.9909 3.50387 2
 12 4 -12 24.0987 4.59151 1
 12 4 -12 22.284 3.91729 2
 -12 4 12 18.0228 3.61333 2
 12 4 -12 20.9568 3.83867 3
 -12 4 12 17.1335 5.36196 6
 -10 -4 12 11.4771 4.21942 6
 -10 -4 12 17.4521 3.10677 2
 10 -4 -12 14.1108 3.30428 2
 10 -4 -12 25.4156 4.93037 1
 10 4 -12 16.9221 4.44381 1
 -10 4 12 14.1362 3.34945 2
 10 4 -12 14.4985 3.53275 3
 8 -4 -12 23.3615 3.63663 2
 -8 -4 12 20.0058 2.75713 2
 8 -4 -12 28.5843 4.46327 1
 -8 -4 12 26.7045 4.66347 6
 -8 -4 12 25.7907 4.2537 4
 8 4 -12 26.0367 4.38675 1
 8 4 -12 20.566 3.58627 3
 -8 4 12 19.2192 3.42579 2
 6 -4 -12 57.9353 5.46543 1
 -6 -4 12 70.9594 6.58046 4
 -6 -4 12 68.7379 6.51592 6
 6 -4 -12 60.8013 5.69016 2
 6 4 -12 62.149 5.60468 3
 -4 -4 12 85.171 7.06851 6
 -4 -4 12 87.2789 7.40384 5
 -4 -4 12 84.7141 7.00614 4
 4 -4 -12 89.8127 6.5936 2
 -4 -4 12 76.045 6.74663 1
 -4 4 12 92.8592 6.65184 2
 -2 -4 12 12.3725 4.59488 5
 -2 -4 12 14.5858 4.04776 4
 2 -4 -12 18.6135 3.67663 2
 -2 -4 12 12.8223 4.83145 6
 -2 -4 12 6.68054 4.52381 1
 -2 4 12 14.5351 3.66534 2
 0 -4 -12 4.03491 3.68063 2
 0 -4 12 2.32759 4.56647 1
 0 -4 12 2.74506 4.35163 5
 0 -4 12 6.9787 4.22897 4
 0 -4 12 0.6899 3.67017 3
 0 4 12 4.66687 3.51024 2
 2 -4 12 -3.5194 4.40774 1
 2 -4 12 -3.7144 3.82635 3
 -2 -4 -12 -2.0203 3.12656 3
 2 -4 12 1.40003 4.80022 5
 -2 -4 -12 0.70061 3.71878 2
 2 4 12 -0.4811 4.13581 1
 2 4 12 -0.769 3.22215 2
 4 -4 12 0.54433 4.70701 1
 -4 -4 -12 2.6202 3.97383 2
 4 -4 12 -1.5278 3.96528 3
 4 -4 12 -3.6353 4.5317 5
 -4 -4 -12 0.29946 2.98477 3
 4 4 12 -4.2457 4.23694 1
 6 -4 12 5.9142 2.82465 2
 6 -4 12 8.43984 4.48776 3
 -6 -4 -12 15.4393 4.70629 2
 6 -4 12 10.5725 5.02489 5
 6 -4 12 14.7726 5.42965 1
 -6 4 -12 5.16278 3.82077 4
 6 4 12 15.7977 5.35063 1
 6 4 12 5.3448 3.94465 2
 8 -4 12 3.88725 3.32403 2
 8 -4 12 -1.7473 4.39413 3
 8 -4 12 1.47451 5.16257 5
 -8 -4 -12 8.69299 4.94596 2
 8 4 12 8.39582 5.93341 1
 -8 4 -12 3.35027 4.13971 4
 8 4 12 -2.6007 3.7606 2
 10 -4 12 25.0535 5.3357 3
 10 -4 12 26.3884 4.31467 2
 10 -4 12 33.7234 6.24787 5
 -10 4 -12 42.3773 7.45161 4
 10 4 12 43.7839 8.61194 1
 -12 -4 -12 9.54695 5.44652 2
 12 -4 12 -2.9083 5.56124 5
 12 -4 12 2.33502 5.36251 3
 12 -4 12 5.80095 4.38995 2
 12 4 12 2.43851 7.39014 1
 -12 4 -12 5.90176 4.58253 4
 29 -5 -12 -12.831 6.83907 2
 29 5 -12 6.31575 7.62445 2
 -29 5 12 -4.3551 7.39507 2
 -29 5 12 -5.4705 7.20757 4
 29 5 -12 1.79406 6.44223 3
 29 5 -12 3.09888 7.15982 6
 27 -5 -12 -1.7228 6.02933 2
 -27 5 12 2.43671 6.9047 2
 -27 5 12 4.07046 6.15225 4
 27 5 -12 -2.4035 5.76708 3
 27 5 -12 -6.5819 6.83367 2
 27 5 -12 -0.2697 6.45812 6
 25 5 -12 11.4555 5.12472 3
 -25 5 12 7.32591 5.36778 4
 25 5 -12 0.96144 5.96172 6
 25 5 -12 6.60703 5.59237 2
 -25 5 12 15.1932 5.73456 2
 23 -5 -12 7.90556 4.98422 2
 23 5 -12 5.90357 5.13227 6
 -23 5 12 -3.8043 5.08975 2
 23 5 -12 -0.2838 5.32354 2
 -23 5 12 4.36436 4.53478 4
 23 5 -12 3.88719 4.41964 3
 21 -5 -12 9.92282 4.60741 2
 21 5 -12 17.4787 6.1125 1
 21 5 -12 15.8051 4.75674 3
 -21 5 12 12.2974 4.04211 4
 -21 5 12 12.1618 4.88965 2
 21 5 -12 12.1813 4.95191 2
 19 -5 -12 85.3634 7.32687 2
 19 5 -12 101.744 7.60132 3
 19 5 -12 111.342 7.71274 6
 -19 5 12 118.766 8.68896 2
 19 5 -12 96.968 8.63961 1
 -19 5 12 96.7149 8.97838 6
 19 5 -12 92.5596 7.50768 2
 17 5 -12 195.288 10.2436 3
 17 5 -12 204.19 11.0582 1
 17 5 -12 194.705 9.63536 2
 -17 5 12 192.678 11.6538 6
 15 -5 -12 166.582 9.07781 2
 15 5 -12 175.384 10.1926 1
 15 5 -12 177.135 8.41901 2
 -15 5 12 159.735 11.3266 6
 15 5 -12 152.853 9.30435 3
 13 -5 -12 101.506 7.12083 2
 13 5 -12 92.351 7.93631 1
 -13 5 12 93.1967 8.97795 6
 13 5 -12 99.5279 6.26487 2
 13 5 -12 92.2288 6.90191 3
 -13 5 12 98.1164 7.43369 2
 11 -5 -12 10.1025 4.97306 1
 11 -5 -12 5.97524 3.76903 2
 -11 5 12 8.87517 5.80159 6
 11 5 -12 0.79786 4.51196 1
 -11 5 12 7.34504 4.00476 2
 11 5 -12 5.94087 2.87783 2
 11 5 -12 8.46789 3.96973 3
 9 -5 -12 21.6109 4.1891 2
 -9 -5 12 22.3184 5.1051 5
 9 -5 -12 20.0479 5.43551 1
 -9 -5 12 28.3437 6.01449 6
 -9 5 12 21.5521 4.17544 2
 9 5 -12 30.6365 4.56047 3
 9 5 -12 22.172 5.06723 1
 7 -5 -12 2.61661 3.67468 2
 -7 -5 12 -1.7423 4.63753 5
 -7 -5 12 5.27433 5.58866 6
 -7 -5 12 -5.0585 4.33798 4
 7 -5 -12 2.9563 4.82347 1
 -7 5 12 -0.2062 3.6782 2
 5 -5 -12 3.18342 3.63001 2
 -5 -5 12 -0.312 4.64549 5
 -5 -5 12 -0.1547 5.54773 6
 -5 -5 12 -4.3627 4.18669 4
 -3 -5 12 304.985 15.7059 6
 -3 -5 12 290.116 14.8761 5
 -3 -5 12 327.49 15.0009 1
 -3 -5 12 347.52 14.1389 3
 3 -5 -12 317.346 13.5377 2
 -3 -5 12 313.884 14.0623 4
 -3 5 12 333.433 13.9008 2
 -1 -5 12 144.14 10.8264 5
 -1 -5 12 136.352 9.20737 1
 -1 -5 12 160.06 9.25518 3
 -1 -5 12 131.385 10.3173 6
 1 -5 -12 161.599 9.27711 2
 -1 -5 12 152.922 9.55633 4
 1 -5 12 45.3613 8.13728 5
 1 -5 12 57.5074 6.93614 3
 -1 -5 -12 46.0475 6.17074 3
 1 -5 12 55.5999 7.66394 6
 -1 -5 -12 59.592 7.56274 2
 1 -5 12 58.465 8.01239 4
 1 -5 12 44.8591 7.47383 1
 1 5 12 47.1588 5.44116 2
 -3 -5 -12 72.8108 6.76499 3
 -3 -5 -12 90.6497 8.19279 2
 3 -5 12 81.5696 7.74814 3
 3 -5 12 72.1435 8.29675 1
 3 -5 12 74.4354 9.30345 6
 3 -5 12 85.5213 8.44574 5
 3 5 12 75.4207 7.55611 2
 5 -5 12 35.1452 5.74227 3
 -5 -5 -12 48.5301 7.85046 2
 -5 -5 -12 34.3887 5.90945 3
 5 -5 12 37.5559 6.30267 5
 5 -5 12 39.4038 7.79559 1
 5 5 12 45.2884 6.72926 1
 5 5 12 30.409 5.10294 2
 7 -5 12 31.177 5.91856 5
 7 -5 12 32.9499 6.11024 3
 7 -5 12 35.9436 7.29634 6
 -7 -5 -12 32.032 5.93658 2
 7 -5 12 38.9954 7.04813 1
 7 5 12 28.1123 7.29113 1
 -9 -5 -12 55.6956 8.90431 2
 9 -5 12 64.1923 9.5287 1
 9 -5 12 52.7778 7.71606 5
 9 -5 12 44.0178 6.6116 3
 9 5 12 70.7282 8.05165 2
 9 5 12 56.9627 9.70419 1
 11 -5 12 36.7057 7.9278 5
 11 -5 12 32.6698 8.19248 6
 11 -5 12 33.8701 7.13593 3
 -11 -5 -12 47.2918 6.93717 2
 11 -5 12 43.2104 8.67923 1
 11 5 12 46.2294 9.38948 1
 -11 5 -12 31.5918 5.70433 4
 -26 6 12 6.84959 6.83004 4
 -26 6 12 6.86591 7.69011 2
 26 6 -12 -0.958 6.4775 3
 26 6 -12 -0.8303 7.4424 2
 26 6 -12 15.5897 7.94703 6
 24 6 -12 -2.0845 6.95352 2
 24 6 -12 -1.2712 7.23263 6
 24 6 -12 5.25722 5.75067 1
 24 6 -12 7.53321 5.77951 3
 22 6 -12 14.1374 5.2867 3
 22 6 -12 17.0155 5.99495 1
 22 6 -12 15.8781 7.42813 6
 22 6 -12 9.59238 6.49913 2
 -20 6 12 11.312 7.58712 6
 20 6 -12 14.7076 6.95654 6
 20 6 -12 10.1593 5.78464 1
 20 6 -12 3.84543 5.59037 2
 20 6 -12 0.91819 4.57517 3
 -18 6 12 7.70082 5.65415 2
 18 6 -12 4.06504 4.33267 3
 -18 6 12 -6.4605 7.1204 6
 18 6 -12 6.53039 5.64211 1
 16 6 -12 2.1676 5.37192 1
 16 6 -12 6.67013 4.41589 3
 -16 6 12 -1.9462 6.5548 6
 -16 6 12 7.08632 5.10092 2
 14 -6 -12 7.2906 4.68704 2
 14 -6 -12 12.9768 5.8077 1
 14 6 -12 5.61062 4.37067 3
 -14 6 12 6.05545 5.02865 2
 14 6 -12 6.50684 5.19524 1
 -14 6 12 0.62404 7.40686 6
 12 -6 -12 11.7239 5.89993 1
 12 6 -12 2.7344 4.98954 1
 -12 6 12 11.9469 4.89823 2
 -12 6 12 6.59229 6.99558 6
 10 -6 -12 14.8624 6.24711 1
 -10 -6 12 7.791 6.39306 5
 -10 6 12 11.9157 4.57505 2
 -8 -6 12 -1.8344 5.01722 4
 -8 -6 12 8.05556 6.27142 5
 8 -6 -12 12.4743 6.24982 1
 -8 6 12 10.597 6.73331 6
 6 -6 -12 5.56543 4.75788 2
 -6 -6 12 9.80372 6.01423 5
 6 -6 -12 16.6919 6.13196 1
 -6 -6 12 2.36971 5.02183 4
 -6 -6 12 7.21157 7.05939 6
 -6 6 12 2.15352 4.60316 2
 4 -6 -12 23.8636 5.26526 2
 -4 -6 12 14.7928 6.2701 5
 -4 -6 12 26.8322 5.938 1
 -4 -6 12 18.548 5.36035 4
 -4 -6 12 18.5076 7.29171 6
 -4 -6 12 16.6062 5.32638 3
 -4 6 12 16.1318 4.89661 2
 -2 -6 12 -0.7017 5.00364 3
 -2 -6 12 3.12603 5.33036 1
 2 -6 -12 9.3856 4.93031 2
 -2 -6 12 2.15224 4.80105 4
 -2 -6 12 3.77426 6.77783 6
 -2 -6 12 0.3267 5.31778 5
 -2 6 12 -0.3214 4.88735 2
 0 -6 12 -1.904 4.8104 3
 0 -6 -12 2.82528 5.13444 3
 0 -6 12 16.7151 7.81282 6
 0 -6 -12 11.9574 5.27775 2
 0 -6 12 5.3428 5.09317 4
 0 -6 12 1.97309 5.58321 5
 0 -6 12 1.70693 5.5307 1
 0 6 12 -6.4107 4.72133 2
 2 -6 12 4.80875 5.58697 3
 2 -6 12 2.91365 5.90384 1
 2 -6 12 5.22465 5.65288 5
 -2 -6 -12 11.9018 5.39448 2
 -2 -6 -12 -0.444 5.34556 3
 2 6 12 3.642 5.0238 2
 4 -6 12 8.72636 6.64729 1
 -4 -6 -12 5.32865 5.66084 3
 4 -6 12 2.55052 5.91246 3
 -4 -6 -12 16.2005 5.63356 2
 4 -6 12 1.2876 7.56261 6
 4 -6 12 6.45169 6.2908 5
 6 -6 12 0.62858 6.4717 3
 -6 -6 -12 5.53061 6.09628 2
 6 -6 12 8.85939 8.34114 6
 -6 -6 -12 1.10717 5.59999 3
 6 -6 12 3.28845 7.30216 1
 6 -6 12 -0.4368 6.04895 5
 8 -6 12 14.0109 8.29894 1
 8 -6 12 4.27077 6.51582 5
 8 -6 12 6.66791 7.72999 3
 8 -6 12 19.7282 9.0577 6
 -8 -6 -12 7.76627 6.20293 2
 8 6 12 5.64337 8.26971 1
 -21 7 12 -0.1454 7.24666 2
 21 7 -12 13.2002 10.1066 6
 21 7 -12 -1.7022 5.5856 3
 21 7 -12 11.8246 6.70519 1
 19 -7 -12 16.3919 7.80534 1
 -19 7 12 48.2595 9.68634 6
 19 7 -12 30.1954 6.73039 1
 17 -7 -12 58.2263 9.04698 1
 17 7 -12 49.8359 7.94664 1
 -17 7 12 54.259 9.662 6
 15 -7 -12 30.038 7.36884 1
 -15 7 12 17.6546 7.78394 6
 15 7 -12 6.948 5.43504 1
 13 -7 -12 2.81187 7.12958 1
 -13 7 12 4.31223 8.48202 6
 -13 7 12 13.5399 6.46598 2
 13 7 -12 9.76995 5.84841 1
 11 -7 -12 -2.3994 7.23515 1
 -11 -7 12 -0.3737 5.9543 4
 -11 -7 12 7.2887 8.02882 5
 11 -7 -12 -3.4407 5.99288 2
 -11 7 12 10.3989 7.85326 6
 -9 -7 12 -8.2304 5.41699 4
 9 -7 -12 -6.5328 6.97475 1
 -9 -7 12 4.5058 8.10023 5
 -9 7 12 3.9731 7.38364 6
 -7 -7 12 16.2123 6.48916 4
 7 -7 -12 54.2985 9.32414 2
 7 -7 -12 30.0126 7.81266 1
 -7 7 12 29.3146 6.38638 2
 -5 -7 12 25.0383 6.42158 4
 -5 -7 12 23.0665 5.94124 3
 5 -7 -12 33.2117 6.7679 2
 -5 -7 12 33.2075 8.32704 5
 -5 7 12 14.6036 6.1922 2
 -3 -7 12 31.8178 6.30351 3
 -3 -7 12 40.6214 9.85923 6
 3 -7 -12 34.6847 6.86445 3
 3 -7 -12 36.3031 7.6584 2
 -3 -7 12 37.2271 6.46506 4
 -3 -7 12 41.7332 7.20664 1
 -3 -7 12 42.4067 8.30315 5
 -3 7 12 36.8862 7.16388 2
 1 -7 -12 43.0217 7.07114 3
 1 -7 -12 51.3311 8.11296 2
 -1 -7 12 39.4142 10.3884 6
 -1 -7 12 55.2046 8.80652 5
 -1 -7 12 60.3306 9.61215 4
 -1 -7 12 37.6772 7.09183 3
 -1 -7 12 52.5367 8.83033 1
 -1 7 12 44.7341 6.82333 5
 1 -7 12 25.8247 7.43337 1
 -1 -7 -12 36.7939 7.51469 2
 1 -7 12 19.3989 6.85516 4
 1 -7 12 28.8971 8.07154 5
 1 -7 12 28.2246 9.7885 6
 -1 -7 -12 16.0814 6.95739 3
 1 -7 12 25.4199 6.76482 3
 1 7 12 21.595 5.78187 5
 1 7 12 22.7338 7.14978 2
 3 -7 12 17.2777 7.80007 1
 3 -7 12 38.2074 9.95413 6
 3 -7 12 29.381 7.95822 3
 -3 -7 -12 24.7149 7.80279 3
 3 -7 12 22.0812 7.46411 5
 3 7 12 28.2609 7.70046 2
 34 0 -13 -3.5241 4.18565 2
 -34 0 13 -3.3212 4.73828 2
 34 0 -13 -5.6421 4.62538 2
 34 0 -13 7.26132 5.7207 6
 32 0 -13 -4.0217 3.89638 2
 -32 0 13 11.4205 4.33776 2
 32 0 -13 2.70965 4.59925 6
 30 0 -13 -0.4317 3.80216 6
 30 0 -13 1.35897 3.94632 2
 -28 0 13 2.40179 4.20703 2
 28 0 -13 0.08787 3.65759 2
 28 0 -13 -4.0457 3.13798 6
 26 0 -13 -1.8114 3.18864 2
 -26 0 13 0.20132 4.15136 2
 24 0 -13 14.042 3.49372 2
 -24 0 13 14.2143 3.89056 2
 22 0 -13 0.20323 2.89855 2
 -22 0 13 -2.9966 3.26111 2
 20 0 -13 0.62211 2.64036 2
 -20 0 13 1.04285 2.89373 2
 18 0 -13 -1.2463 2.43676 2
 -18 0 13 -3.4723 2.61558 2
 -16 0 13 0.39852 2.55802 2
 14 0 -13 -1.9062 2.22227 2
 -14 0 13 -2.7512 2.24946 2
 -12 0 13 -0.9519 2.28152 2
 12 0 -13 -2.7958 2.0284 2
 -10 0 13 0.32688 2.05289 2
 10 0 -13 -0.3338 2.0536 2
 -8 0 13 2.26497 2.09824 2
 8 0 -13 -0.5806 2.0722 2
 -6 0 13 -0.8259 2.2196 4
 6 0 -13 -0.1586 2.01006 2
 -6 0 13 -0.7423 2.00946 2
 4 0 -13 2.42876 2.08082 2
 -4 0 13 4.81795 2.12189 2
 4 0 -13 1.56127 2.06525 4
 2 0 -13 -0.7388 1.96835 2
 -2 0 13 0.64786 2.22044 2
 2 0 -13 -1.9304 2.14378 4
 0 0 13 0.37158 2.41096 2
 0 0 -13 2.25287 2.33891 4
 0 0 -13 -0.0157 2.3656 2
 0 0 -13 1.22611 1.46273 3
 -2 0 -13 -4.2765 2.52475 4
 2 0 13 -4.39 2.4729 2
 -2 0 -13 0.01952 2.46124 2
 -4 0 -13 -1.9546 2.74303 4
 -4 0 -13 -0.3873 2.57889 2
 4 0 13 -3.2588 2.68928 2
 -6 0 -13 -3.0238 3.03897 4
 6 0 13 -2.1682 2.90199 2
 -6 0 -13 0.51066 3.00957 2
 6 0 13 -2.2588 3.32348 5
 -8 0 -13 3.59801 3.52811 4
 8 0 13 -3.1257 3.65587 5
 -8 0 -13 1.93286 3.23983 2
 8 0 13 -3.1759 3.0169 2
 -10 0 -13 -0.2067 3.71921 4
 10 0 13 -1.0769 4.18739 5
 -10 0 -13 1.84318 3.68821 2
 10 0 13 -4.1247 3.10327 2
 12 0 13 -0.453 4.55275 5
 12 0 13 1.42105 3.51143 2
 -12 0 -13 3.58312 4.69525 2
 -14 0 -13 -2.5776 4.67962 4
 14 0 13 -1.3719 4.06488 2
 -14 0 -13 -2.7574 4.92895 2
 16 0 13 7.46236 5.928 2
 -16 0 -13 11.2981 6.64582 2
 -16 0 -13 -3.2856 5.33718 4
 16 0 13 5.02556 6.10925 5
 35 -1 -13 7.6954 4.80747 2
 35 -1 -13 5.87964 4.79167 2
 35 -1 -13 14.2652 7.01243 6
 35 1 -13 10.2319 5.6913 6
 33 -1 -13 17.0279 6.00779 6
 33 -1 -13 12.6882 4.34008 2
 33 1 -13 17.9765 4.73261 6
 -33 1 13 18.075 5.1631 2
 33 1 -13 2.87054 5.04224 2
 31 -1 -13 60.0934 6.6994 2
 -31 -1 13 57.9015 6.70316 2
 31 -1 -13 41.4205 6.76328 6
 31 1 -13 53.3023 5.18897 6
 31 1 -13 39.2918 7.03886 2
 -29 -1 13 103.863 7.66482 2
 29 -1 -13 84.5699 7.15164 6
 29 -1 -13 99.5438 7.29395 2
 -29 1 13 110.859 8.00723 2
 29 1 -13 77.0713 7.72886 2
 -27 -1 13 163.341 9.20824 2
 27 -1 -13 169.895 8.85081 2
 27 1 -13 140.279 8.78032 2
 -27 1 13 162.183 9.2197 2
 25 -1 -13 291.731 12.2691 2
 -25 -1 13 298.983 12.6405 2
 -25 1 13 292.439 12.6443 2
 25 1 -13 269.138 12.3214 2
 23 -1 -13 972.429 34.4202 2
 -23 -1 13 1015.64 34.6229 2
 23 1 -13 967.852 34.3358 2
 -23 1 13 981.951 34.5232 2
 -21 -1 13 65.6987 5.58147 2
 21 -1 -13 69.5576 5.73759 2
 -21 1 13 76.9264 5.92605 2
 21 1 -13 71.6578 5.57707 2
 -19 -1 13 28.5364 4.66536 2
 19 -1 -13 34.8811 3.80907 2
 -19 1 13 32.2756 4.92581 2
 19 1 -13 26.3041 4.55587 2
 17 -1 -13 31.2082 3.51947 2
 -17 -1 13 28.8455 3.31656 2
 17 1 -13 27.6305 3.38136 2
 -17 1 13 24.8777 3.38159 2
 -17 1 13 24.1535 3.0938 6
 15 -1 -13 9.21862 2.664 2
 -15 -1 13 6.70069 2.53875 2
 -15 1 13 9.98408 2.63312 6
 15 1 -13 8.17997 2.62599 2
 -15 1 13 7.38587 2.86258 2
 -13 -1 13 -1.5781 2.2956 2
 13 -1 -13 -2.5642 2.171 2
 -13 1 13 -1.9006 2.31577 2
 13 1 -13 0.0445 2.22468 2
 -11 -1 13 11.8182 2.36199 2
 11 -1 -13 14.3237 2.6281 2
 -11 1 13 11.1442 2.58847 2
 11 1 -13 14.6692 2.34044 2
 9 -1 -13 748.461 25.954 2
 -9 -1 13 745.978 25.6734 2
 -9 -1 13 764.864 26.131 4
 9 1 -13 765.358 27.8334 1
 9 1 -13 711.353 25.6328 2
 -9 1 13 744.386 25.5134 4
 -9 1 13 746.016 26.0457 2
 7 -1 -13 66.7079 4.63397 2
 -7 -1 13 63.1262 4.89909 4
 -7 -1 13 68.4779 4.19869 2
 7 1 -13 70.0378 4.20689 2
 7 1 -13 62.8292 3.83349 1
 -7 1 13 67.5384 4.6969 2
 5 -1 -13 264.845 9.4974 4
 -5 -1 13 242.61 9.39754 2
 -5 -1 13 246.27 10.0953 4
 5 -1 -13 245.305 9.91569 2
 -5 1 13 250.478 9.93848 2
 5 1 -13 238.147 9.50978 2
 -3 -1 13 757.622 27.3642 4
 3 -1 -13 787.674 27.0122 4
 3 -1 -13 792.703 27.3684 2
 -3 -1 13 763.941 26.877 2
 -3 1 13 810.512 27.324 2
 3 1 -13 771.677 26.9388 2
 3 1 -13 795.002 27.3691 4
 3 1 -13 780.264 27.4834 3
 1 -1 -13 165.186 7.77085 2
 -1 -1 13 177.45 7.34076 2
 1 -1 -13 167.983 7.46784 4
 1 1 -13 183.361 7.82325 4
 1 1 -13 166.963 7.38852 2
 -1 1 13 178.7 7.85856 2
 1 1 -13 165.126 6.92263 3
 -1 -1 -13 76.7943 5.66479 2
 -1 -1 -13 89.1669 5.34031 4
 1 -1 13 80.7706 5.04722 2
 1 1 13 89.6972 5.44666 2
 -1 1 -13 83.0326 5.15814 2
 -1 1 -13 98.397 5.75424 4
 -3 -1 -13 29.6838 4.79253 2
 3 -1 13 28.4018 4.18209 2
 -3 -1 -13 30.6354 4.68088 4
 3 1 13 31.8198 4.65254 2
 -3 1 -13 26.5457 4.44139 2
 -3 1 -13 35.4238 4.80192 4
 -5 -1 -13 28.7413 3.86239 2
 5 -1 13 29.7665 3.5918 2
 5 -1 13 32.1015 4.53316 5
 -5 -1 -13 28.4485 4.1205 4
 5 1 13 29.8193 3.90523 2
 -5 1 -13 28.8749 5.06853 4
 -5 1 -13 25.8171 3.65013 2
 7 -1 13 30.8457 5.16372 5
 7 -1 13 27.4765 4.92831 2
 -7 -1 -13 32.7934 5.84354 2
 -7 1 -13 31.5705 4.07353 2
 7 1 13 32.5458 4.3295 5
 -7 1 -13 31.3407 4.10388 4
 7 1 13 33.6918 4.19559 2
 9 -1 13 1.814 4.26393 5
 -9 -1 -13 4.44377 3.76266 2
 9 -1 13 4.61727 3.2208 2
 9 1 13 6.25077 3.2483 2
 9 1 13 4.43186 3.79809 5
 -9 1 -13 9.00157 3.79348 2
 -9 1 -13 0.35132 3.48228 4
 -11 -1 -13 27.2959 5.00602 2
 11 -1 13 25.6594 4.45757 2
 11 -1 13 29.6448 5.62459 5
 11 1 13 29.6486 4.85869 5
 -11 1 -13 23.1863 4.8826 2
 11 1 13 21.3692 3.98088 2
 -11 1 -13 25.884 4.75206 4
 13 -1 13 21.4753 4.87025 2
 13 -1 13 28.9095 6.30518 5
 -13 -1 -13 27.0966 5.49778 2
 -13 1 -13 25.7666 5.51696 2
 -13 1 -13 20.3819 4.80499 4
 13 1 13 21.8022 4.16963 2
 13 1 13 27.904 5.78912 5
 -15 -1 -13 16.5144 5.65456 2
 15 -1 13 19.9371 6.35581 5
 15 -1 13 15.003 5.06912 2
 15 -1 13 27.2378 6.11173 2
 -15 1 -13 16.6798 6.73024 2
 -15 1 -13 12.901 5.42157 4
 15 1 13 21.46 6.10011 5
 15 1 13 20.2349 4.63229 2
 34 -2 -13 2.83606 4.9704 2
 34 -2 -13 -3.8804 8.17498 6
 34 2 -13 -1.8304 4.9098 2
 32 -2 -13 8.00222 7.04887 6
 32 -2 -13 11.3564 4.91504 2
 32 2 -13 4.26034 4.61577 2
 30 -2 -13 28.7221 4.84549 2
 30 -2 -13 39.328 6.56013 6
 -30 2 13 34.0122 5.51647 2
 30 2 -13 25.4206 5.08424 2
 -28 -2 13 3.5779 4.06393 2
 28 -2 -13 2.72707 3.55549 2
 28 2 -13 2.17022 4.39175 2
 -28 2 13 0.1999 4.30626 2
 26 -2 -13 1.76442 3.50328 2
 -26 -2 13 -1.41 4.13615 2
 -26 2 13 6.49064 4.33857 2
 26 2 -13 -3.4493 3.90934 2
 24 -2 -13 14.4788 3.50782 2
 -24 -2 13 12.6772 3.94148 2
 24 2 -13 14.728 4.08043 2
 -22 -2 13 128.109 7.49875 2
 22 -2 -13 122.181 7.29668 2
 22 2 -13 126.822 7.44505 2
 -22 2 13 124.999 7.71873 2
 -20 -2 13 263.447 11.0292 2
 20 -2 -13 261.501 11.0143 2
 20 2 -13 258.689 10.8927 2
 -20 2 13 267.667 11.3003 2
 18 -2 -13 96.9357 5.92246 2
 -18 -2 13 85.8615 5.94877 2
 18 2 -13 92.7283 5.91273 2
 -18 2 13 106.749 6.51172 2
 -18 2 13 93.633 5.96013 6
 16 -2 -13 25.3803 4.19887 2
 -16 -2 13 27.2983 3.18645 2
 -16 2 13 25.8923 4.10821 6
 16 2 -13 25.093 4.08665 2
 -16 2 13 24.1453 3.46821 2
 -14 -2 13 64.6258 4.52093 2
 -14 -2 13 65.1297 3.71531 6
 14 -2 -13 69.9782 5.03852 2
 14 2 -13 64.8428 4.58128 2
 -14 2 13 69.0384 5.28119 2
 12 -2 -13 226.037 9.6056 2
 -12 -2 13 242.514 9.29106 2
 -12 -2 13 235.28 9.84336 6
 -12 2 13 230.02 9.66772 2
 12 2 -13 231.51 9.09442 2
 10 -2 -13 14.2497 2.74183 2
 -10 -2 13 17.4405 3.1447 2
 10 2 -13 17.4609 2.35098 2
 -10 2 13 11.821 2.76406 2
 10 2 -13 18.6208 3.28508 1
 8 -2 -13 64.7772 4.88805 2
 -8 -2 13 61.1789 3.70856 2
 -8 -2 13 49.1334 5.25762 4
 8 2 -13 60.8675 4.4447 3
 -8 2 13 57.755 4.81463 2
 8 2 -13 56.9235 3.98568 2
 8 2 -13 57.5922 4.39763 1
 -6 -2 13 74.0318 4.05627 2
 6 -2 -13 80.0051 5.09359 2
 -6 -2 13 67.5001 5.68833 4
 6 2 -13 72.5731 4.86347 3
 6 2 -13 71.585 4.08675 2
 -6 2 13 81.5474 5.2987 2
 4 -2 -13 9.25549 2.7639 2
 -4 -2 13 7.57545 1.99277 2
 4 -2 -13 8.86025 2.00018 4
 -4 -2 13 2.18911 3.06667 4
 -4 2 13 7.8004 2.9461 2
 4 2 -13 8.90687 2.52897 3
 -2 -2 13 7.54844 3.31159 4
 -2 -2 13 5.93098 2.01022 2
 -2 -2 13 2.05431 3.02595 1
 2 -2 -13 6.43529 2.14377 4
 2 -2 -13 6.3174 2.66536 2
 -2 2 13 4.1998 2.70533 2
 2 2 -13 4.45931 2.32065 3
 0 -2 -13 185.286 7.97215 4
 0 -2 -13 175.219 8.3864 2
 0 -2 13 192.368 8.53191 1
 0 -2 13 179.83 7.66778 2
 0 2 -13 189.01 8.56491 4
 0 2 13 182.267 8.61635 2
 -2 -2 -13 33.1245 5.39369 2
 2 -2 13 33.7946 4.0513 2
 -2 2 -13 36.0395 4.02213 2
 -2 2 -13 38.7105 5.38115 4
 2 2 13 39.4416 4.3928 2
 4 -2 13 13.6569 2.97821 2
 -4 -2 -13 10.6821 3.57538 2
 4 -2 13 13.7089 4.08143 5
 4 2 13 12.4543 3.67469 2
 -4 2 -13 16.2843 3.45586 4
 6 -2 13 12.3064 4.51723 5
 6 -2 13 11.1418 3.18461 2
 -6 -2 -13 11.5878 3.85451 2
 6 2 13 6.55694 3.34362 2
 -6 2 -13 14.7756 3.75714 4
 8 -2 13 48.1655 7.54372 5
 8 -2 13 50.0792 5.40609 2
 -8 -2 -13 48.2385 7.17931 2
 -8 2 -13 61.6719 6.54177 4
 8 2 13 51.487 5.72146 2
 8 2 13 39.9233 5.60249 5
 10 -2 13 24.7412 5.0501 5
 -10 -2 -13 20.7597 4.4256 2
 10 -2 13 20.0429 4.24923 2
 10 2 13 21.4863 4.56936 5
 -10 2 -13 19.0547 4.311 4
 10 2 13 23.0853 4.24614 2
 12 -2 13 38.2479 5.26288 2
 12 -2 13 35.0936 6.51425 5
 -12 -2 -13 32.5239 5.48151 2
 12 -2 13 33.4539 5.08241 2
 12 2 13 33.8082 4.98023 5
 12 2 13 24.3683 4.46828 2
 -12 2 -13 26.5331 4.7052 4
 14 -2 13 6.5325 5.15493 2
 -14 -2 -13 11.9861 5.09811 2
 14 -2 13 5.88735 4.86671 2
 14 -2 13 1.29116 6.03609 5
 14 2 13 2.7344 3.67765 2
 14 2 13 9.27376 4.9333 5
 -14 2 -13 5.82891 4.42768 4
 33 -3 -13 36.7625 9.21178 6
 33 -3 -13 26.3485 6.36476 2
 33 3 -13 24.6354 6.13864 2
 31 -3 -13 70.8043 8.24927 2
 31 3 -13 65.4365 8.43189 2
 29 -3 -13 29.6708 5.01909 2
 -29 3 13 24.7025 5.71944 2
 29 3 -13 29.7408 5.56053 2
 27 -3 -13 53.082 7.12716 2
 27 3 -13 47.4873 6.32066 2
 -27 3 13 44.1532 7.50679 2
 25 -3 -13 7.73419 4.1417 2
 -25 3 13 5.28896 4.28274 2
 25 3 -13 -1.3825 4.39413 2
 23 -3 -13 112.484 7.38394 2
 -23 -3 13 112.355 7.33209 2
 -23 3 13 111.456 7.64652 2
 23 3 -13 100.821 7.88794 2
 -21 -3 13 13.0839 3.76412 2
 21 -3 -13 7.83478 3.48217 2
 21 3 -13 9.32183 3.64524 2
 -21 3 13 7.37566 3.69374 2
 -19 -3 13 20.62 3.84124 2
 19 -3 -13 16.838 3.53089 2
 -19 3 13 21.0097 4.74934 6
 19 3 -13 16.0205 3.61241 2
 -19 3 13 33.7569 5.61539 2
 -17 -3 13 3.12739 3.02937 2
 17 -3 -13 4.58862 3.01451 2
 17 3 -13 12.7021 3.63408 3
 -17 3 13 1.83498 3.31664 2
 -17 3 13 -0.1443 4.02099 6
 17 3 -13 4.17392 2.94398 2
 15 -3 -13 17.4819 3.28904 2
 -15 -3 13 13.7995 3.00645 2
 15 3 -13 16.7052 3.59438 3
 -15 3 13 16.4585 3.42007 2
 -15 3 13 9.60937 4.23128 6
 15 3 -13 19.8084 3.14673 2
 -13 -3 13 21.5637 3.35288 6
 -13 -3 13 15.1919 2.84514 2
 13 -3 -13 18.4448 3.12175 2
 13 3 -13 26.5852 4.08003 1
 -13 3 13 19.1821 3.30077 2
 13 3 -13 21.1224 2.94287 2
 13 3 -13 23.8475 4.19842 3
 -11 -3 13 33.4532 4.16266 6
 11 -3 -13 31.413 4.6216 2
 -11 -3 13 27.3194 3.55001 2
 11 3 -13 28.4196 4.44182 3
 11 3 -13 32.5621 4.76637 1
 -11 3 13 29.5779 4.74364 2
 11 3 -13 34.9204 3.56358 2
 -9 -3 13 60.4789 4.05368 2
 -9 -3 13 62.0743 5.28435 6
 9 -3 -13 64.5561 5.05109 2
 9 -3 -13 63.0892 4.66532 1
 9 3 -13 65.8791 4.00374 2
 9 3 -13 56.4591 5.13635 1
 -9 3 13 61.8192 5.40782 2
 9 3 -13 59.7348 5.0084 3
 -7 -3 13 40.4524 5.51194 4
 7 -3 -13 29.9606 3.87108 1
 7 -3 -13 45.6135 5.02247 2
 7 3 -13 38.03 4.37879 3
 -7 3 13 39.0601 4.95973 2
 5 -3 -13 154.999 7.81062 2
 -5 -3 13 148.641 8.09072 4
 5 3 -13 142.893 7.18777 3
 -5 3 13 153.744 7.71912 2
 3 -3 -13 30.2483 5.03473 2
 -3 -3 13 24.3411 4.78842 1
 3 -3 -13 33.0393 3.52225 4
 -3 -3 13 33.368 5.65831 4
 -3 3 13 33.4035 5.36573 2
 3 3 -13 23.2718 4.30762 3
 -1 -3 13 132.658 7.87189 1
 -1 -3 13 150.993 8.39358 4
 -1 -3 13 124.348 5.85926 2
 1 -3 -13 146.009 7.7004 2
 -1 3 13 136.978 7.6985 2
 1 -3 13 77.4587 7.17825 5
 1 -3 13 70.1703 4.63589 2
 1 -3 13 64.8891 6.29404 1
 -1 -3 -13 71.4769 6.73587 2
 1 3 13 62.7454 6.31473 2
 3 -3 13 36.8306 5.70463 1
 -3 -3 -13 35.1371 6.08165 2
 -3 -3 -13 38.3766 3.33285 3
 3 -3 13 35.6192 6.78679 5
 3 -3 13 35.9569 4.34189 2
 3 3 13 41.5274 4.8945 2
 3 3 13 42.8502 5.07764 1
 -3 3 -13 42.2221 5.84966 4
 -5 -3 -13 37.5843 6.63666 2
 5 -3 13 29.6521 3.63604 2
 5 -3 13 35.136 5.70756 5
 5 3 13 42.8492 5.56248 1
 5 3 13 33.5921 4.71455 2
 -5 3 -13 37.6583 4.82314 4
 -7 -3 -13 35.3494 5.10127 2
 7 -3 13 28.8663 4.04433 2
 7 -3 13 31.1991 4.89183 2
 7 -3 13 35.6401 5.86721 5
 -7 3 -13 33.1433 4.9253 4
 7 3 13 33.5998 6.15953 1
 7 3 13 30.4475 4.63607 2
 9 -3 13 3.00945 3.79153 2
 9 -3 13 3.33231 4.84565 5
 -9 -3 -13 6.65447 4.3667 2
 9 3 13 0.34201 3.54385 5
 -9 3 -13 5.89784 4.01551 4
 11 -3 13 1.38484 5.62379 5
 11 -3 13 -5.3344 4.14792 2
 11 -3 13 -2.1104 4.10434 2
 -11 -3 -13 4.50068 4.19907 2
 -11 3 -13 0.11389 3.82074 4
 11 3 13 -1.0404 3.47641 2
 13 -3 13 19.869 5.13869 2
 -13 -3 -13 22.3752 5.46097 2
 13 -3 13 24.3615 7.07627 5
 -13 3 -13 27.2904 4.93312 4
 30 -4 -13 26.9811 6.60867 2
 30 4 -13 21.4503 6.62922 3
 -30 4 13 20.1078 7.17491 2
 30 4 -13 21.9365 5.38199 6
 28 -4 -13 -5.2948 4.91786 2
 28 4 -13 -4.0603 4.40255 6
 28 4 -13 -2.9467 5.38248 3
 28 4 -13 -5.0794 5.44248 2
 26 -4 -13 -0.9876 4.29523 2
 26 4 -13 4.14387 4.88417 3
 -26 4 13 1.44854 5.05543 2
 26 4 -13 -7.5168 5.29379 2
 24 -4 -13 3.67656 4.32546 2
 24 4 -13 -1.1523 4.77741 2
 24 4 -13 9.28645 3.82781 6
 24 4 -13 8.78127 4.42548 3
 22 -4 -13 6.97301 3.98373 2
 -22 4 13 9.96639 4.36514 2
 22 4 -13 7.04022 4.34142 2
 22 4 -13 13.7653 4.338 3
 20 -4 -13 77.4326 6.52577 2
 -20 4 13 76.8689 7.74132 6
 20 4 -13 58.2961 6.52012 2
 20 4 -13 69.6636 6.81485 3
 -20 4 13 93.342 7.41559 2
 18 -4 -13 175.723 9.12537 2
 -18 4 13 186.956 10.7203 6
 -18 4 13 197.097 9.78237 2
 18 4 -13 176.324 8.98632 2
 18 4 -13 176.465 9.5067 3
 -16 -4 13 109.461 6.4537 2
 16 -4 -13 99.1463 7.08864 2
 16 4 -13 122.973 7.98677 1
 16 4 -13 107.059 7.35105 3
 16 4 -13 119.293 6.90402 2
 -16 4 13 117.2 7.58508 2
 -16 4 13 116.885 8.87536 6
 -14 -4 13 215.911 8.90644 2
 14 -4 -13 199.518 9.77503 2
 -14 4 13 214.958 9.98666 2
 14 4 -13 213.98 8.99771 2
 14 4 -13 209.403 9.99102 3
 14 4 -13 218.314 10.6674 1
 -14 4 13 202.123 11.1111 6
 -12 -4 13 255.643 11.9226 6
 12 -4 -13 261.151 11.2509 2
 -12 -4 13 272.943 10.1153 2
 12 4 -13 268.268 10.1793 2
 12 4 -13 252.308 11.4691 3
 -12 4 13 255.997 11.3394 2
 12 4 -13 254.544 12.1251 1
 10 -4 -13 81.0891 6.27322 2
 -10 -4 13 83.7844 4.66694 2
 -10 -4 13 76.9125 6.46029 6
 10 -4 -13 81.4365 6.04573 1
 10 4 -13 65.3597 6.50438 1
 -10 4 13 73.8778 6.28569 2
 10 4 -13 82.7958 4.63474 2
 10 4 -13 79.2732 6.16573 3
 -8 -4 13 63.1814 6.3877 6
 8 -4 -13 58.3176 5.99256 2
 8 -4 -13 48.7488 5.52213 1
 -8 -4 13 48.6466 6.51155 4
 -8 4 13 51.3615 5.73612 2
 8 4 -13 67.3062 5.87071 1
 8 4 -13 56.6275 5.43737 3
 6 -4 -13 85.9616 6.1546 1
 6 -4 -13 92.375 6.74845 2
 -6 -4 13 93.9915 7.18435 6
 -6 -4 13 96.697 7.65152 4
 6 4 -13 88.9998 6.33866 3
 -6 4 13 93.2085 6.55591 2
 -4 -4 13 5.28047 4.82204 6
 -4 -4 13 9.65693 4.49925 1
 4 -4 -13 11.8544 3.46582 2
 -4 -4 13 9.11785 4.34746 5
 -4 -4 13 13.0542 4.2929 4
 -4 4 13 10.0798 3.71653 2
 -2 -4 13 15.5326 4.79549 1
 -2 -4 13 18.2097 4.77037 5
 -2 -4 13 15.4939 4.40402 4
 2 -4 -13 13.826 3.82165 2
 -2 -4 13 12.5639 5.18327 6
 -2 4 13 15.8148 4.00919 2
 0 -4 -13 29.8572 4.55577 2
 0 -4 13 34.3094 5.62205 1
 0 -4 13 24.3347 5.44563 5
 0 -4 13 31.2808 5.13796 4
 0 4 13 26.389 4.31697 2
 -2 -4 -13 3.45436 3.9922 2
 2 -4 13 2.41011 4.99723 5
 2 -4 13 2.6894 5.06434 1
 -2 -4 -13 1.43246 3.14254 3
 4 -4 13 -4.55 4.71161 5
 -4 -4 -13 -0.5912 3.01136 3
 4 -4 13 3.0635 5.00833 1
 4 -4 13 0.58265 4.0343 3
 -4 -4 -13 -0.9023 4.03395 2
 4 4 13 -0.6979 4.48211 1
 4 4 13 0.38266 3.56848 2
 6 -4 13 22.5218 6.23608 1
 6 -4 13 16.4297 4.73565 3
 -6 -4 -13 26.8179 5.01426 2
 6 -4 13 17.7913 5.33579 5
 6 4 13 14.2361 4.28629 2
 -6 4 -13 8.69739 4.26134 4
 6 4 13 23.8326 5.5843 1
 8 -4 13 43.7528 8.10838 1
 8 -4 13 47.1649 8.51701 5
 8 -4 13 35.3113 6.60685 3
 -8 -4 -13 53.0993 8.77048 2
 -8 4 -13 34.4997 5.11313 4
 -10 -4 -13 33.1343 5.65777 2
 10 -4 13 33.187 5.42738 3
 10 -4 13 33.0438 7.22722 5
 10 4 13 48.3742 9.0109 1
 10 4 13 26.1495 4.78066 2
 12 -4 13 13.382 6.58388 5
 -12 -4 -13 40.2389 6.21954 2
 12 -4 13 24.1496 5.00453 2
 12 4 13 23.1375 4.92192 2
 -29 5 13 3.40245 7.64229 2
 29 5 -13 -1.5216 6.44003 6
 29 5 -13 -4.0156 6.66172 3
 -29 5 13 -0.0903 6.86226 4
 29 5 -13 7.6378 7.08023 2
 27 -5 -13 4.76362 5.93487 2
 -27 5 13 14.393 6.50783 2
 27 5 -13 3.46513 5.71664 3
 -27 5 13 2.13709 5.83442 4
 -25 5 13 10.1659 5.15515 4
 25 5 -13 5.77486 5.76876 2
 25 5 -13 4.63673 4.79683 3
 25 5 -13 11.8082 5.41751 6
 23 -5 -13 18.2634 5.10637 2
 23 5 -13 27.4583 5.92963 2
 -23 5 13 24.0182 4.6394 4
 -23 5 13 21.1668 5.64498 2
 23 5 -13 31.2793 5.28383 3
 23 5 -13 37.2005 6.80572 6
 21 -5 -13 4.4302 4.48531 2
 -21 5 13 11.3323 6.92941 6
 21 5 -13 8.44349 4.29839 3
 21 5 -13 9.10993 5.4639 1
 21 5 -13 1.14764 4.52373 2
 19 -5 -13 17.5212 4.4955 2
 19 5 -13 26.7544 5.67116 1
 -19 5 13 28.2622 6.73549 6
 19 5 -13 36.4763 6.11243 3
 -17 5 13 10.6877 4.609 2
 17 5 -13 9.11853 4.1259 2
 17 5 -13 12.1899 4.30647 3
 17 5 -13 17.8338 5.44116 1
 -17 5 13 15.4294 6.43917 6
 15 -5 -13 2.98212 3.85209 2
 -15 5 13 2.85314 6.36535 6
 -15 5 13 4.14748 4.1437 2
 15 5 -13 4.56776 3.63376 2
 15 5 -13 6.98718 5.15519 1
 15 5 -13 2.76299 3.94539 3
 13 -5 -13 8.1871 3.9266 2
 13 -5 -13 12.1928 5.17001 1
 13 5 -13 9.07527 5.14523 1
 13 5 -13 10.0791 3.38285 2
 13 5 -13 14.2791 4.17174 3
 -13 5 13 7.8778 4.15322 2
 -13 5 13 10.3478 5.99224 6
 11 -5 -13 20.7364 5.35659 1
 11 -5 -13 15.7752 4.11782 2
 -11 5 13 14.7953 4.15469 2
 11 5 -13 15.4512 4.11964 3
 11 5 -13 13.9904 4.78499 1
 -11 5 13 16.1156 6.29083 6
 -9 -5 13 6.0031 5.88844 6
 -9 -5 13 4.05601 5.01851 5
 9 -5 -13 11.3826 5.32051 1
 -9 5 13 10.4294 4.09616 2
 9 5 -13 9.11204 4.11038 3
 9 5 -13 19.3965 4.73968 1
 -7 -5 13 48.3723 7.47371 6
 -7 -5 13 49.0557 7.22151 5
 7 -5 -13 38.2951 6.27026 1
 7 -5 -13 37.1024 6.56264 2
 -7 -5 13 21.2287 5.3336 4
 -7 5 13 30.5445 4.62042 2
 5 -5 -13 14.6495 4.12377 2
 -5 -5 13 4.50785 5.21167 5
 -5 -5 13 10.2567 5.92519 6
 -5 -5 13 1.29882 4.57804 4
 -5 5 13 3.65945 3.89898 2
 -3 -5 13 68.5151 8.20873 5
 3 -5 -13 83.8597 7.2763 2
 -3 -5 13 63.8449 8.44092 6
 -3 -5 13 84.0112 8.05866 4
 -3 -5 13 69.5244 7.44038 1
 -1 -5 13 8.40637 4.70338 4
 1 -5 -13 8.55891 4.44268 2
 -1 -5 13 5.37237 5.19058 1
 -1 -5 13 8.60736 5.35092 5
 -1 -5 13 -5.2501 6.01837 6
 -1 -5 13 3.72605 4.39133 3
 -1 5 13 -1.1214 3.99025 2
 -1 -5 -13 10.4653 4.45005 2
 1 -5 13 2.88669 5.02622 5
 1 -5 13 2.50127 4.72219 3
 1 -5 13 -3.5393 6.04504 6
 -1 -5 -13 6.8319 4.23977 3
 1 -5 13 4.40007 5.55593 1
 1 5 13 -0.4927 3.97506 2
 3 -5 13 6.11223 5.12407 5
 3 -5 13 -3.4365 4.75138 3
 3 -5 13 -6.0454 6.21105 6
 -3 -5 -13 -0.4302 4.2784 3
 3 -5 13 4.79088 6.09849 1
 -3 -5 -13 7.07633 4.51048 2
 3 5 13 -2.1623 4.36669 2
 5 -5 13 1.86258 5.43377 5
 5 -5 13 4.51983 5.07128 3
 -5 -5 -13 6.05429 4.79992 2
 5 -5 13 4.95625 6.08534 1
 -5 -5 -13 0.82155 3.9964 3
 5 5 13 -3.0175 5.79429 1
 5 5 13 2.44843 4.17555 2
 -7 -5 -13 10.791 5.60399 2
 7 -5 13 14.5557 6.51075 5
 7 -5 13 7.29582 7.15081 6
 7 -5 13 3.90543 5.98113 3
 7 -5 13 17.5807 7.19589 1
 7 5 13 10.7252 4.35734 2
 7 5 13 3.58832 6.80034 1
 9 -5 13 3.01037 7.54614 6
 9 -5 13 13.9174 8.21277 1
 -9 -5 -13 4.74547 5.45166 2
 9 -5 13 0.72792 6.22955 3
 9 -5 13 -0.0058 6.09414 5
 9 5 13 6.68529 4.48273 2
 9 5 13 8.68855 7.61558 1
 26 6 -13 2.93522 6.23191 3
 26 6 -13 7.71901 7.92559 6
 26 6 -13 -2.8323 7.57019 2
 24 6 -13 9.23892 5.90556 1
 24 6 -13 19.4381 7.61975 6
 24 6 -13 7.79663 5.56999 3
 -24 6 13 10.6316 6.5808 2
 24 6 -13 6.44537 6.52997 2
 22 6 -13 9.36311 5.73734 1
 22 6 -13 8.8595 4.90603 3
 22 6 -13 1.17672 6.13661 2
 -20 6 13 30.3489 8.30957 6
 20 6 -13 18.6045 5.70942 1
 20 6 -13 10.9266 4.75213 3
 18 6 -13 69.2982 7.27753 3
 18 6 -13 59.3377 7.76676 1
 -18 6 13 65.0987 9.53539 6
 16 -6 -13 86.3047 8.45363 2
 16 -6 -13 81.478 8.44717 1
 16 6 -13 75.4955 8.32625 1
 16 6 -13 82.1181 7.44794 2
 -16 6 13 90.9909 9.08408 2
 -16 6 13 71.2618 9.52721 6
 16 6 -13 80.4797 7.67605 3
 14 -6 -13 136.335 9.79652 1
 14 6 -13 122.961 9.44092 1
 14 6 -13 123.061 8.99664 3
 -14 6 13 147.381 9.92285 2
 -14 6 13 139.307 10.8748 6
 -12 -6 13 113.09 10.5953 5
 12 -6 -13 109.085 9.21343 1
 12 -6 -13 121.046 8.93463 2
 -12 6 13 124.82 9.23916 2
 12 6 -13 107.863 8.68302 1
 -12 6 13 116.351 9.89745 6
 12 6 -13 100.009 7.70907 3
 -10 -6 13 21.1519 5.77006 4
 10 -6 -13 29.4343 5.33659 2
 -10 -6 13 20.2524 6.68875 5
 10 -6 -13 28.7536 7.05862 1
 -10 6 13 25.8836 5.43078 2
 -10 6 13 26.7533 7.57686 6
 8 -6 -13 4.16362 4.74689 2
 -8 -6 13 3.18148 7.19075 6
 -8 -6 13 -9.6181 5.83963 5
 8 -6 -13 -1.0227 5.90036 1
 -8 6 13 4.99462 4.83015 2
 -6 -6 13 8.10627 7.36113 6
 -6 -6 13 10.9954 6.1113 5
 -6 -6 13 6.0509 5.02306 4
 6 -6 -13 7.90503 4.69504 2
 -6 6 13 3.27389 4.57449 2
 -4 -6 13 -4.5985 5.99144 5
 -4 -6 13 -2.8767 6.58909 6
 -4 -6 13 -3.3205 5.07603 4
 -4 -6 13 6.16552 5.56562 1
 4 -6 -13 4.68856 5.04096 2
 -4 6 13 -3.3022 4.6192 2
 2 -6 -13 8.43608 5.09838 2
 -2 -6 13 3.7959 5.16703 3
 -2 -6 13 1.78638 5.51446 1
 -2 -6 13 6.31457 7.94956 6
 -2 -6 13 3.83439 5.85324 5
 -2 -6 13 8.00927 5.18149 4
 0 -6 13 -6.4418 5.81028 1
 0 -6 13 21.46 8.61577 6
 0 -6 13 11.5084 5.7413 5
 0 -6 13 5.82738 5.43228 3
 0 -6 -13 3.37305 5.22054 3
 0 -6 13 10.4237 5.42094 4
 0 -6 -13 7.31815 5.59404 2
 0 6 13 -6.9536 4.8888 2
 -2 -6 -13 3.96816 5.65638 3
 2 -6 13 17.414 6.74251 5
 2 -6 13 10.7068 8.82803 6
 2 -6 13 8.69372 5.79306 3
 -2 -6 -13 22.6567 5.8301 2
 2 -6 13 8.61491 7.00321 1
 -4 -6 -13 20.3269 6.22526 3
 4 -6 13 24.9687 6.43554 5
 4 -6 13 17.128 8.94764 6
 4 -6 13 19.6889 6.59754 3
 4 -6 13 23.3957 7.8616 1
 4 6 13 9.65887 5.82147 2
 6 -6 13 25.1405 8.73654 1
 -6 -6 -13 39.9071 7.18849 2
 6 -6 13 21.6082 6.95806 5
 6 -6 13 36.3145 9.41124 6
 6 -6 13 21.7582 7.43083 3
 19 -7 -13 12.045 7.86194 1
 19 7 -13 0.32965 5.1162 3
 19 7 -13 10.9183 6.16969 1
 -19 7 13 28.8609 8.58148 6
 -19 7 13 25.1169 7.52937 2
 17 -7 -13 18.2515 7.7642 1
 -17 7 13 14.0941 7.44775 2
 17 7 -13 21.7326 6.49069 1
 -17 7 13 11.011 7.53431 6
 15 -7 -13 13.0538 7.45207 1
 15 7 -13 11.0024 5.51304 1
 -15 7 13 8.32563 8.1763 6
 -15 7 13 9.41441 6.39945 2
 13 -7 -13 2.58719 7.47579 1
 -13 7 13 6.73791 8.4482 6
 13 7 -13 5.79695 5.3129 1
 -13 7 13 4.48442 6.40585 2
 -11 -7 13 12.286 8.98825 5
 11 -7 -13 10.219 6.48392 2
 11 -7 -13 2.99972 7.54429 1
 -11 -7 13 -8.3226 5.92278 4
 -11 7 13 7.06007 6.0166 2
 -11 7 13 -2.7114 7.45609 6
 -9 -7 13 19.3667 8.35851 5
 9 -7 -13 11.1392 7.82595 1
 9 -7 -13 17.2734 6.60167 2
 -9 7 13 13.5718 6.06885 2
 7 -7 -13 52.1903 9.15728 2
 -7 -7 13 65.5485 11.0041 5
 -5 -7 13 5.30783 6.12483 4
 -5 -7 13 6.58587 8.14191 5
 5 -7 -13 11.5369 6.71644 2
 -5 7 13 2.47487 6.524 2
 -3 -7 13 10.5427 7.57963 5
 -3 -7 13 14.7757 6.10077 4
 3 -7 -13 13.9115 7.1043 2
 -3 -7 13 2.14926 5.75099 3
 -3 -7 13 -2.7305 9.87211 6
 3 -7 -13 8.83428 6.57988 3
 -1 -7 13 7.94764 6.16657 4
 1 -7 -13 6.72271 7.12497 2
 -1 -7 13 5.45959 6.07978 3
 -1 -7 13 2.14266 9.98934 6
 1 -7 -13 5.64362 6.83278 3
 -1 -7 13 4.8869 6.99277 1
 -1 -7 13 14.3744 7.70904 5
 1 -7 13 19.0099 7.77582 5
 -1 -7 -13 9.64199 7.35603 3
 1 -7 13 19.2576 6.87685 4
 1 -7 13 13.7782 6.92728 3
 -1 -7 -13 28.1062 7.56821 2
 -34 0 14 1.33214 4.44611 2
 34 0 -14 -8.0126 4.81859 6
 34 0 -14 5.76208 4.62367 2
 32 0 -14 1.76014 4.29982 6
 32 0 -14 6.03411 4.38081 2
 -32 0 14 1.80072 4.59214 2
 -30 0 14 42.4211 6.62416 2
 30 0 -14 29.7807 4.40707 2
 -28 0 14 62.7287 6.93622 2
 28 0 -14 46.435 6.14348 2
 26 0 -14 70.1043 6.38445 2
 -26 0 14 67.5422 6.58422 2
 -24 0 14 309.546 12.8968 2
 24 0 -14 291.795 12.4955 2
 -22 0 14 205.021 9.55062 2
 22 0 -14 208.758 9.46069 2
 -20 0 14 883.867 30.5791 2
 20 0 -14 855.464 30.4331 2
 18 0 -14 316.172 12.5487 2
 -18 0 14 329.249 12.6107 2
 -16 0 14 2.04547 2.58768 2
 16 0 -14 2.64268 2.50296 2
 14 0 -14 -2.3238 2.21713 2
 -14 0 14 -4.7293 2.31164 2
 12 0 -14 12.6184 2.54108 2
 -12 0 14 9.85864 2.5251 2
 -10 0 14 4.7593 2.28046 2
 -10 0 14 4.28525 2.48033 4
[truncated: 191,174 more chars]
